# Supplementary material for: Copper mediated C–H amination with oximes: en route to primary anilines
Source: PubMed Central journal article supplement — Chem Sci. 2018 May 14;9(23):5160–4. doi: 10.1039/c8sc01256c (PMC6001278; doi:10.1039/c8sc01256c), 2018-05-14

## Supporting Information

For

### Copper Catalyzed C-H Amination with Oximes: En Route to Primary Anilines

Lin-Lin Xu<sup>b, †</sup>, Xing Wang<sup>a, †</sup>, Biao Ma<sup>a</sup>, Ming-Xing Yin<sup>a</sup>, Hai-Xia Lin<sup>b</sup>, Hui-Xiong Dai<sup>\*a</sup>, Jin-Quan Yu<sup>c</sup>

<sup>a</sup>Departement of Medicinal Chemistry, Shanghai Institute of Materia Medica, Chinese Academy of Sciences, 555 Zu Chong Zhi Road, Shanghai 201203, China; University of Chinese Academy of Sciences, Beijing 100049, China. <sup>b</sup>Department of Chemistry, Innovative Drug Research Center, Shanghai University, 99 Shangda Road, Shanghai 200444, China. <sup>c</sup>Department of Chemistry, The Scripps Research Institute, 10550 N. Torrey Pines Road, La Jolla, California 92037, USA.

#### Table of Contents

|                                                                                     |     |
|-------------------------------------------------------------------------------------|-----|
| 1. General Information.....                                                         | S2  |
| 2. Experimental Section.....                                                        | S2  |
| 2.1 Preparation of Substrates.....                                                  | S2  |
| 2.2 Optimization Studies.....                                                       | S6  |
| 2.3 Typical Procedures for Copper Catalyzed Primary Amination of Aryl C–H bond..... | S11 |
| 2.4 Typical Procedure for Directing Group Removal.....                              | S12 |
| 2.5 Typical Procedure for Preparation of Aniline Derivatives.....                   | S13 |
| 2.6 Typical Procedure for Gram-Scale Reaction.....                                  | S13 |
| 2.7 Procedure for Kinetic Isotope Effect Experiments.....                           | S15 |
| 3. Analytical Data.....                                                             | S17 |
| 3.1 Characterization of Substrates .....                                            | S17 |
| 3.2 Characterization of Products.....                                               | S30 |
| 3.3 X-ray Crystallographic Date of <b>3a-A</b> , <b>5a</b> .....                    | S50 |
| 4. References.....                                                                  | S66 |
| 5. NMR Spectra for New Compounds.....                                               | S68 |

## 1. General Information

All commercial reagents were purchased from TCI, Sigma-Aldrich, Adamas-beta, 9-Ding chemistry and Energy Chemical of the highest purity grade. They were used without further purification unless specified.  $^1\text{H}$  and  $^{13}\text{C}$  NMR spectra were recorded on Bruker AVANCE III 400, Bruker AVANCE III 500 and Bruker AVANCE III 600 (400 MHz, 125 MHz and 150 MHz, respectively) instruments.  $^{19}\text{F}$  NMR spectra were recorded on Bruker AVANCE III 500 instrument and are reported relative to the  $\text{CFCl}_3$  as the internal standard. The peaks were internally referenced to TMS (0.00 ppm) or residual undeuterated solvent signal. The following abbreviations were used to explain multiplicities: s = singlet, d = doublet, t = triplet, q = quartet, m = multiplet, and br = broad. High resolution mass spectra were recorded at the Center for Mass Spectrometry, Shanghai Institute of Organic Chemistry and Shanghai Institute of Material Medica.

## 2. Experimental Section

### 2.1.1 Preparation of Substrates 1a-1t, 4a-4h.

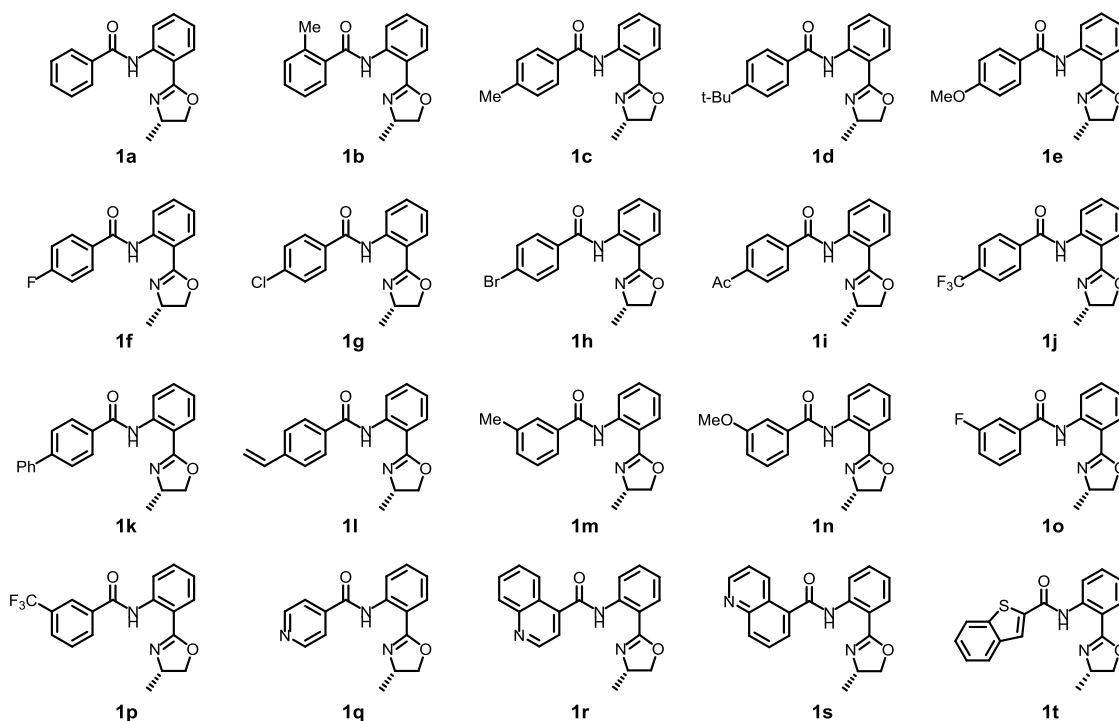

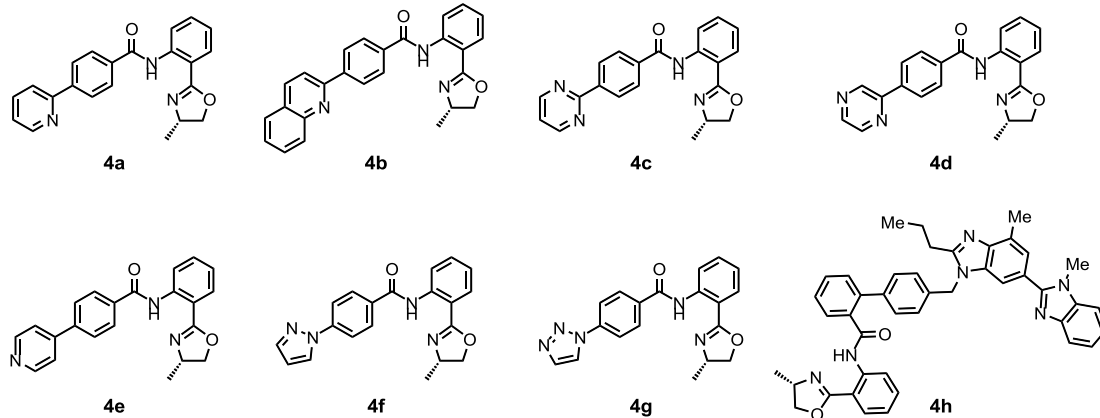

### 2.1.2 Synthesis of (*S*)-2-(4-methyl-4,5-dihydrooxazol-2-yl)aniline.<sup>1,2</sup>

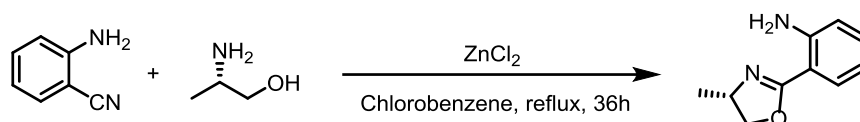

2-aminobenzonitrile (19.8 g, 168 mmol) and  $\text{ZnCl}_2$  (2.32 g, 17 mmol) was added to a 500 mL three-necked flask, and then suspended in chlorobenzene (240 mL) under nitrogen. L-Alanine (39.2 ml, 504 mmol) was added to the suspension via a syringe. The mixture was slowly heated to reflux until no gas was produced. After refluxing for 36 hours, the reaction mixture was cooled down to room temperature and the solvent was removed in a rotary evaporator.  $\text{CH}_2\text{Cl}_2$  (250 mL) was added to the residue and washed with saturated  $\text{NaHCO}_3$  (150 mL) and  $\text{H}_2\text{O}$  (150 mL). The aqueous fraction was extracted with  $\text{CH}_2\text{Cl}_2$  (250 mL  $\times$  3). The combined organic phase was dried over  $\text{Na}_2\text{SO}_4$ , filtered and the solvent was removed in a rotary evaporator. The crude product was purified by flash column chromatography on silica gel with a gradient eluent of petroleum ether and ethyl acetate to give yellow oil of the compound (*S*)-2-(4-methyl-4,5-dihydrooxazol-2-yl)aniline 23.4 g (79%).

### 2.1.3 Preparation of Substrates 1a-1p.

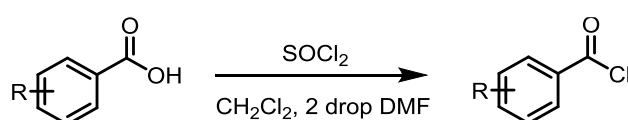

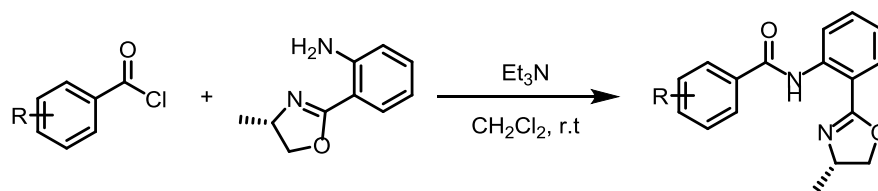

An acid chloride (5 mmol), prepared from the corresponding carboxylic acid and thionyl chloride and (S)-2-(4-methyl-4,5-dihydrooxazol-2-yl)aniline (5 mmol) were added to a 50 mL flask and then dissolved with CH<sub>2</sub>Cl<sub>2</sub> (15 mL). Et<sub>3</sub>N (7.5 mmol) was taken to the vigorously stirred solution via a syringe. The reaction mixture was stirred at room temperature for 6 h and quenched with saturated NaHCO<sub>3</sub>. H<sub>2</sub>O (100 mL) was added to the mixture and extracted with CH<sub>2</sub>Cl<sub>2</sub> (50 mL x 3). Combined organic phase was washed with saturated NaCl (aq) and dried over Na<sub>2</sub>SO<sub>4</sub>, and then filtered, the solvent was removed in a rotary evaporator. The crude product was purified by flash column chromatography on silica gel with a gradient eluent of petroleum ether and ethyl acetate to give colorless crystals of the product with the yield from 70% to 95%.

#### 2.1.4 Preparation of Substrates 1q-1t, 4a-4g.<sup>3</sup>

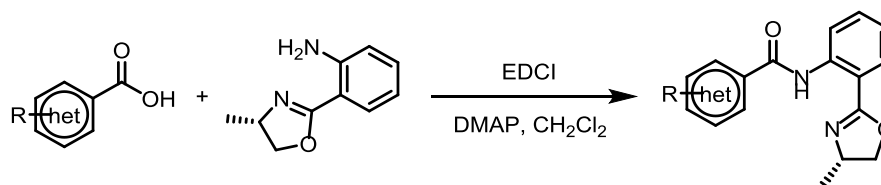

A heterocycle carboxylic acid (4 mmol) and (S)-2-(4-methyl-4,5-dihydrooxazol-2-yl)aniline (3 mmol) were taken to a 50 mL flask and dissolved with CH<sub>2</sub>Cl<sub>2</sub> (20 mL). DMAP (0.5 mmol) and EDCI (6 mmol) were added to the mixture under ice bath and then stirred for 24 h at room temperature. Saturated NaHCO<sub>3</sub> was added to the mixture to quench reaction and then extracted with CH<sub>2</sub>Cl<sub>2</sub> (50 mL x 3). Combined organic phase was washed with saturated NaCl (aq) and dried over Na<sub>2</sub>SO<sub>4</sub>, and then filtered, the solvent was removed in a rotary evaporator. The crude product was purified by flash column chromatography on silica gel with a gradient eluent of petroleum ether and ethyl acetate with the yield from 55% to 90%.

#### 2.1.5 Preparation of Substrate 4h.<sup>4</sup>



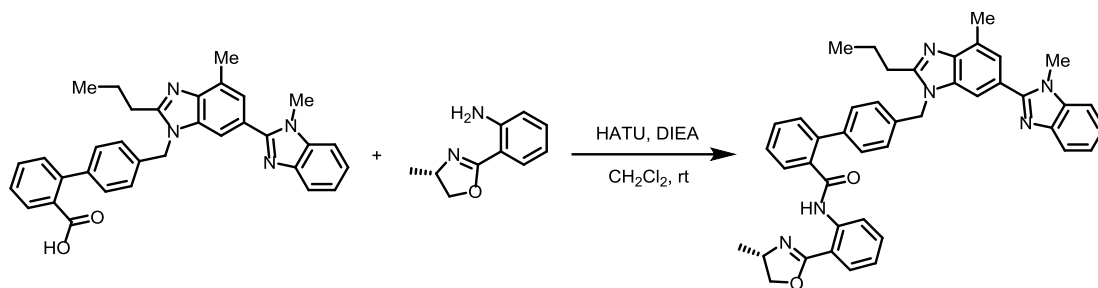

Telmisartan (3 mmol) and DIEA (4.5 mmol) were dispersed with  $\text{CH}_2\text{Cl}_2$  (15 mL) in a 50 mL flask. After the suspension turned transparent, HATU (4.5 mmol) was added. The solvent was stirred for 2 hours before (*S*)-2-(4-methyl-4,5-dihydrooxazol-2-yl)aniline (4.5 mmol) was added, then stirred for another 8 hours at room temperature. Saturated  $\text{NaHCO}_3$  was added to the mixture to quench reaction and then extracted with  $\text{CH}_2\text{Cl}_2$  (30 mL x 3). Combined organic phase was washed with saturated  $\text{NaCl}$  (aq) and dried over  $\text{Na}_2\text{SO}_4$ , and then filtered, the solvent was removed in a rotary evaporator. The crude product was purified by flash column chromatography on aluminum oxide with a gradient eluent of petroleum ether and ethyl acetate with the yield 75%.

### 2.1.6 Preparation of Aminated Agent 2a.<sup>5</sup>

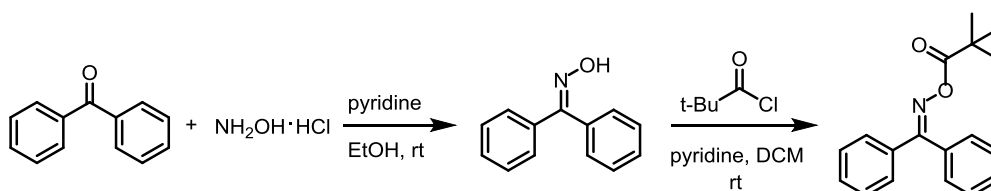

Hydroxylamine hydrochloride (2.86 g, 1.5 equiv) and pyridine (4.4 mL, 2.0 equiv) were added to the diphenylmethanone (5 g, 27.44 mmol) in 30 mL EtOH and the mixture was stirred at room temperature for 8 hours. The solvent was removed in vacuo and the resulting residue was dissolved in 20 mL DCM and washed with Dilute hydrochloric acid. Aqueous phase was extracted with  $\text{CH}_2\text{Cl}_2$  three times, combined organic phase was washed with Saturated  $\text{NaHCO}_3$  and brine, dried over  $\text{Na}_2\text{SO}_4$ , and then filtered, the solvent was removed in a rotary evaporator. The crude product was dissolved in 30 mL DCM and cooled to 0 °C. After the addition of pyridine (2.4 mL, 1.1 equiv), pivaloyl chloride (3.7 mL, 1.1 equiv) was added dropwise at 0 °C. The mixture was stirred at room temperature overnight and quenched with water. The

aqueous layer was extracted with DCM three times and the combined organic layers were washed with saturated NaHCO<sub>3</sub> and brine, dried over Na<sub>2</sub>SO<sub>4</sub>, filtered and concentrated in vacuo. The crude product was recrystallized from DCM/Hexane to give colorless crystals of the product with 93% yield (7.2 g).

## 2.2 Optimization Studies

The reaction tube was directly placed into a pre-heated 90 °C oil bath.

**Table S1. Screening of Oxime Esters.<sup>a</sup>**

| entry | 2a | Yield (%) |  | entry | 2a | Yield (%) |
|-------|----|-----------|--|-------|----|-----------|
| 1     |    | trace     |  | 6     |    | 17        |
| 2     |    | trace     |  | 7     |    | trace     |
| 3     |    | trace     |  | 8     |    | N.R.      |
| 4     |    | trace     |  | 9     |    | N.R.      |
| 5     |    | N.R.      |  | 10    |    | 25        |

<sup>a</sup>1a (0.1 mmol), 2a (0.15 mmol), CuCl (20 mol %), DMSO (1 mL), 100 °C, 8 h, N<sub>2</sub>, HCl (aq, 2 mol/L, 2 mL). The yield was determined by <sup>1</sup>H NMR analysis of crude product using CH<sub>2</sub>Br<sub>2</sub> as internal standard.

**Table S2. Screening of the Solvents.<sup>a</sup>**

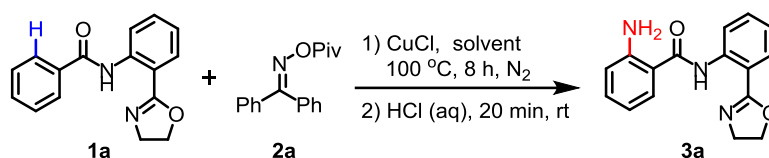

| entry | solvent            | Yield (%) | entry | solvent        | Yield (%) |
|-------|--------------------|-----------|-------|----------------|-----------|
| 1     | DMSO               | 25        | 7     | Chlorobenzene  | N.R.      |
| 2     | DMF                | 19        | 8     | DMA            | 8         |
| 3     | 1,4-Dioxane        | 5         | 9     | DMP            | N.R.      |
| 4     | CH <sub>3</sub> CN | trace     | 10    | THF            | N.R.      |
| 5     | HFIP               | N.R.      | 11    | Toluene        | N.R.      |
| 6     | DCE                | N.R.      | 12    | 50%DMSO+50%DMF | 24        |

<sup>a</sup>**1a** (0.1 mmol), **2a** (0.15 mmol), CuCl (20 mol %), solvent (1 mL), 100 °C, 8 h, N<sub>2</sub>, HCl (aq, 2 mol/L, 2 mL). the yield was determined by <sup>1</sup>H NMR analysis of crude product using CH<sub>2</sub>Br<sub>2</sub> as internal standard.

**Table S3. The Effect of Concentration.<sup>a</sup>**

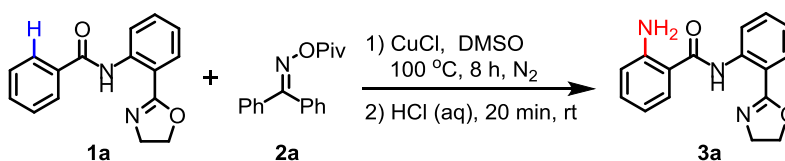

| entry | DMSO(mL) | Yield (%) |
|-------|----------|-----------|
| 1     | 0.5      | 23        |
| 2     | 1        | 25        |
| 3     | 2        | 21        |
| 4     | 3        | 16        |
| 5     | 5        | 5         |

<sup>a</sup>**1a** (0.1 mmol), **2a** (0.15 mmol), CuCl (20 mol %), DMSO (x mL), 100 °C, 8 h, N<sub>2</sub>, HCl (aq, 2 mol/L, 2 mL). the yield was determined by <sup>1</sup>H NMR analysis of crude product using CH<sub>2</sub>Br<sub>2</sub> as internal standard.

**Table S4. Screening of the Copper Salts.<sup>a</sup>**

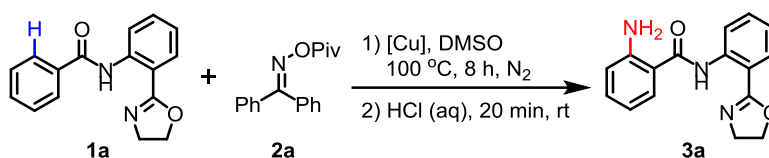

| entry | [Cu]                  | Yield (%) |
|-------|-----------------------|-----------|
| 1     | Cu <sub>2</sub> O     | 10        |
| 2     | CuBr·SMe <sub>2</sub> | 17        |
| 3     | CuOAc                 | 28        |
| 4     | Cu(OAc) <sub>2</sub>  | 21        |
| 5     | CuI                   | 21        |
| 6     | CuBr                  | 24        |
| 7     | CuCl                  | 25        |

<sup>a</sup> **1a** (0.1 mmol), **2a** (0.15 mmol), [Cu] (20 mol %), DMSO (1 mL), 100 °C, 8 h, N<sub>2</sub>, HCl (aq, 2 mol/L, 2 mL). the yield was determined by <sup>1</sup>H NMR analysis of crude product using CH<sub>2</sub>Br<sub>2</sub> as internal standard.

**Table S5. The Effect of Atmosphere.<sup>a</sup>**

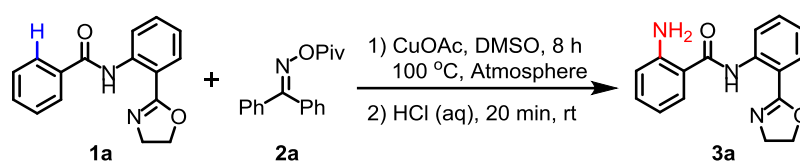

| entry | Atmosphere     | yield(%) |
|-------|----------------|----------|
| 1     | N <sub>2</sub> | 28       |
| 2     | Air            | 25       |

<sup>a</sup> **1a** (0.1 mmol), **2a** (0.15 mmol), CuOAc (20 mol %), DMSO (1 mL), 100 °C, 8 h, HCl (aq, 2 mol/L, 2 mL). the yield was determined by <sup>1</sup>H NMR analysis of crude product using CH<sub>2</sub>Br<sub>2</sub> as internal standard.

**Table S6. Screening of Directing Group.<sup>a</sup>**

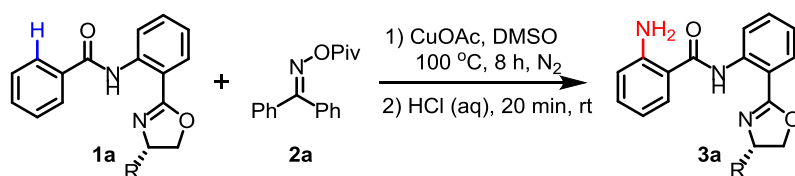

|                    |     |
|--------------------|-----|
| R=H                | 28% |
| R=Me               | 35% |
| R= <sup>i</sup> Pr | 20% |
| R= <sup>t</sup> Bu | 20% |
| R=Ph               | 26% |
| R=Bn               | 21% |

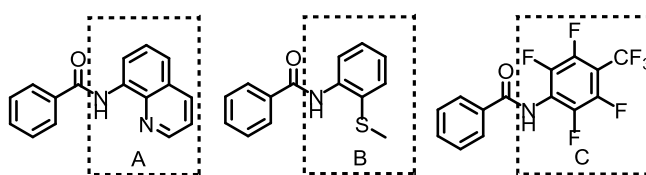

N.R.

N.R.

N.R.

<sup>a</sup>**1a** (0.1 mmol), **2a** (0.15 mmol), CuOAc (20 mol %), DMSO (1 mL), 100 °C, 8 h, N<sub>2</sub>, HCl (aq, 2 mol/L, 2 mL). the yield was determined by <sup>1</sup>H NMR analysis of crude product using CH<sub>2</sub>Br<sub>2</sub> as internal standard.

**Table S7. Screening of Bases.<sup>a</sup>**

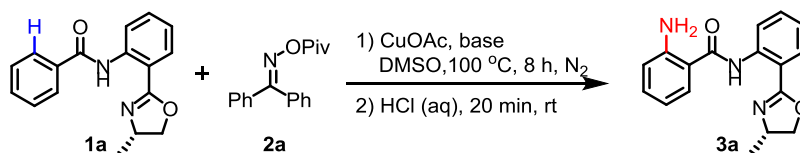

| entry | base                            | yield(%) | entry | base                            | yield(%) |
|-------|---------------------------------|----------|-------|---------------------------------|----------|
| 1     | Na <sub>2</sub> CO <sub>3</sub> | 39       | 8     | KH <sub>2</sub> PO <sub>4</sub> | 42       |
| 2     | K <sub>2</sub> CO <sub>3</sub>  | 16       | 9     | NaOAc                           | 41       |
| 3     | Cs <sub>2</sub> CO <sub>3</sub> | 0        | 10    | NaF                             | 40       |
| 4     | NaHCO <sub>3</sub>              | 36       | 11    | KF                              | 32       |
| 5     | KHCO <sub>3</sub>               | 37       | 12    | CsF                             | 35       |
| 6     | K <sub>3</sub> PO <sub>4</sub>  | 35       | 13    | Py                              | 9        |
| 7     | K <sub>2</sub> HPO <sub>4</sub> | 46       | 14    | ---                             | 40       |

<sup>a</sup> **1a** (0.1 mmol), **2a** (0.15 mmol), CuOAc (30 mol %), base (0.1 mmol), DMSO (1 mL), 100 °C, 8 h, N<sub>2</sub>, HCl (aq, 2 mol/L, 2 mL). The yield was determined by <sup>1</sup>H NMR analysis of crude product using CH<sub>2</sub>Br<sub>2</sub> as internal standard.

**Table S8. Screening of Amount of CuOAc.<sup>a</sup>**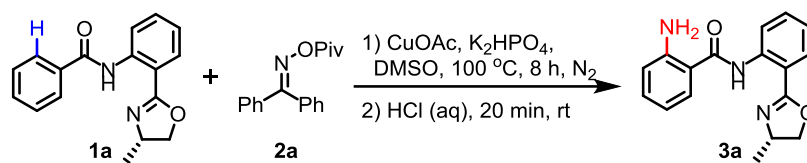

| entry | Cu     | Yield (%) |
|-------|--------|-----------|
| 1     | 0.2 eq | 38        |
| 2     | 0.3 eq | 46        |
| 3     | 0.6 eq | 50        |
| 4     | 1.0 eq | 52        |
| 5     | 1.5 eq | 58        |

<sup>a</sup>**1a** (0.1 mmol), **2a** (0.15 mmol), CuOAc (x mmol), K<sub>2</sub>HPO<sub>4</sub> (0.1 mmol), DMSO (1 mL), 100 °C, 8 h, N<sub>2</sub>, HCl (aq, 2 mol/L, 2 mL). the yield was determined by <sup>1</sup>H NMR analysis of crude product using CH<sub>2</sub>Br<sub>2</sub> as internal standard.

**Table S9. Screening of Temperature.<sup>a</sup>**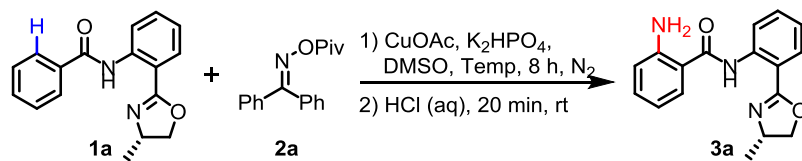

| entry | Temp (°C) | Yield (%) |
|-------|-----------|-----------|
| 1     | 70        | 59        |
| 2     | 80        | 67        |
| 3     | 90        | 78        |
| 4     | 100       | 58        |

<sup>a</sup>**1a** (0.1 mmol), **2a** (0.15 mmol), CuOAc (0.15 mmol), DMSO (1 mL), K<sub>2</sub>HPO<sub>4</sub> (0.1 mmol), 8 h, N<sub>2</sub>, HCl (aq, 2 mol/L, 2 mL). the yield was determined by <sup>1</sup>H NMR analysis of crude product using CH<sub>2</sub>Br<sub>2</sub> as internal standard.

**Table S10. Screening of Amount of 2a.<sup>a</sup>**

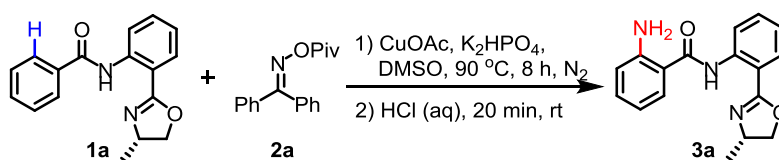

| entry | <b>2a</b> | Yield (%) |
|-------|-----------|-----------|
| 1     | 1.0 eq    | 68        |
| 2     | 1.5 eq    | 78        |
| 3     | 2.0 eq    | 64        |
| 4     | 3.0 eq    | 59        |

<sup>a</sup>**1a** (0.1 mmol), **2a** (x mmol), CuOAc (0.15 mol), K<sub>2</sub>HPO<sub>4</sub> (0.1 mol), DMSO (1 mL), 90 °C, 8h, N<sub>2</sub>, HCl (aq, 2 mol/L, 2 mL). the yield was determined by <sup>1</sup>H NMR analysis of crude product using CH<sub>2</sub>Br<sub>2</sub> as internal standard.

**Table S11. Screening of Time.<sup>a</sup>**

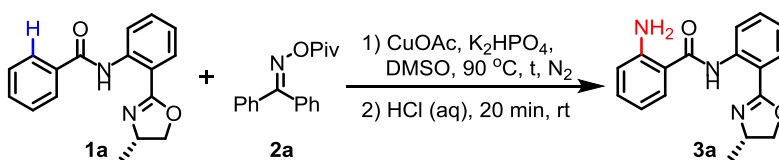

| entry | t (h) | Yield (%) |
|-------|-------|-----------|
| 1     | 8     | 38        |
| 2     | 10    | 45        |
| 3     | 12    | 49        |
| 4     | 14    | 48        |

<sup>a</sup>**1a** (0.1 mmol), **2a** (0.15 mmol), CuOAc (30 mol %), K<sub>2</sub>HPO<sub>4</sub> (0.1 mol), DMSO (1 mL), 90 °C, N<sub>2</sub>, HCl (aq, 2 mol/L, 2 mL). the yield was determined by <sup>1</sup>H NMR analysis of crude product using CH<sub>2</sub>Br<sub>2</sub> as internal standard.

## 2.3 Typical Procedures for Copper Catalyzed Primary Amination of Aryl C–H

### Bond

To a 25 mL sealed tube was added substrates **1** (0.1 mmol, 1 equiv), CuOAc (0.15 mmol), K<sub>2</sub>HPO<sub>4</sub> (0.1 mmol), DMSO (1 mL) and **2a** (0.15 mmol). The reaction tube was placed into a pre-heated oil bath and stirred at 90 °C for 8 h under N<sub>2</sub>. Upon completion, 2 mL 2N HCl was added after cooling to room temperature. The resulting mixture was stirred at room temperature for 20 mins under air atmosphere before it was quenched with

the addition of 2N NaOH (2 mL). Then EtOAc was added to dilute the mixture and washed with NH<sub>3</sub> H<sub>2</sub>O and saturated NaCl(aq). The organic fraction was dried over anhydrous Na<sub>2</sub>SO<sub>4</sub>, evaporated and the residue purified by a silica gel packed flash chromatography column, using ethyl acetate/hexane as the eluent.

#### 2.4 Typical Procedure for Directing Group Removal.<sup>6</sup>

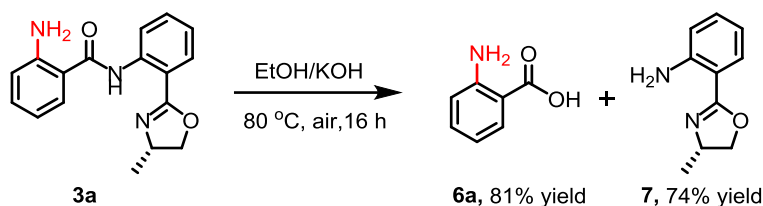

To a 50 mL round-bottomed flask was added **3a** (188 mg, 0.64 mmol), KOH (1428 mg, 25.5 mmol), EtOH (13 mL). The reaction mixture was stirred at 80 °C for 16 h under air. After completion, evaporated to remove solvent, and added EtOAc (40 mL x 3) to extract. The organic phase was dried over Na<sub>2</sub>SO<sub>4</sub> evaporated and purified by flash column chromatography on silica gel with a gradient eluent of petroleum ether and ethyl acetate to recovery Directing Group **7** with a yield of 74% (83 mg). The water fraction was acidated with 1N HCl to PH 4~5, and then extracted with EtOAc. The organic fraction was dried over Na<sub>2</sub>SO<sub>4</sub> evaporated and purified by flash column chromatography on silica gel with a gradient eluent of petroleum ether and ethyl acetate to get hydrolysis product **6a** with a yield of 81% (71 mg).

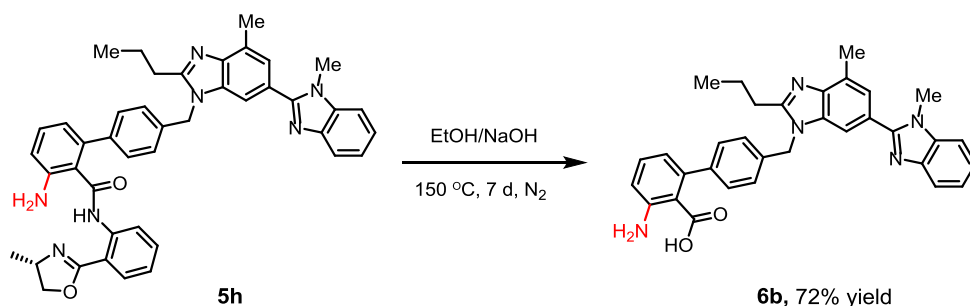

To a 25 mL sealed tube was added **5h** (27.5 mg, 0.04 mmol), NaOH (160 mg, 4.0 mmol), EtOH (2 mL). The reaction mixture was stirred at 150 °C for 7 days under N<sub>2</sub>. After completion, evaporated to remove solvent, diluted HCl solution was added to the



reaction mixture until pH is around 7, then the product was retracted from aqueous phase with dichloromethane and ethyl acetate. Organic fraction was dried over Na<sub>2</sub>SO<sub>4</sub>, evaporated and a crude product was obtained. The product was purified with flash column chromatography on silica gel (DCM:MeOH:HOAc = 10:1:0.2) to get hydrolysis product **6b** with a yield of 72% (15.2 mg).

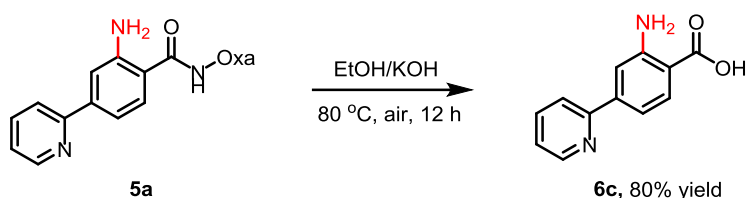

To a 15 mL sealed tube was added substrate **5a** (11.2 mg, 0.03 mmol), KOH (67.2 mg, 1.2 mmol), EtOH (0.5 ml). The reaction mixture was stirred at 80 °C for 12 h under air. Upon completion, 1N hydrochloric acid was added to acidify the mixture to around pH 7.0 and then extracted with dichloromethane. The organic fraction was dried over Na<sub>2</sub>SO<sub>4</sub>, evaporated and purified by flash column chromatography on silica gel (DCM:EtOAc:HCOOH = 3:1:0.03) to get hydrolysis product **6c** with a yield of 80% (5.1 mg).

## 2.5 Typical Procedure for Preparation of Aniline derivatives

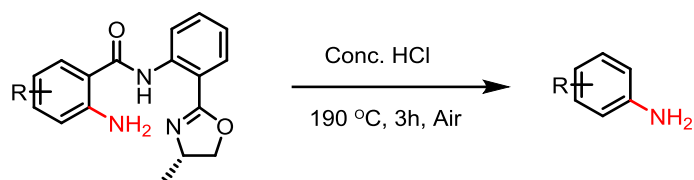

To a 15 mL sealed tube was added substrates **3** or **5** (0.03 mmol), conc.HCl (0.5 ml). The reaction mixture was stirred at 190 °C for 3 h under air. Upon completion, diluted NaOH solution was added to the reaction mixture until pH is around 9, then the product was retracted from aqueous phase with dichloromethane. Organic fraction was dried over Na<sub>2</sub>SO<sub>4</sub>, evaporated and a crude product was obtained. The product was purified by a silica gel packed flash chromatography column.

## 2.6 Typical Procedure for Gram-Scale Reaction.

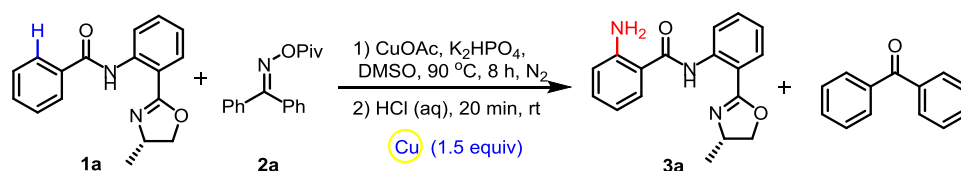

To a 250 mL sealed tube was added substrates **1a** (1.0 g, 3.57 mmol), CuOAc (656 mg, 5.36 mmol), K<sub>2</sub>HPO<sub>4</sub> (621 mg, 3.57 mmol), **2a** (1.05 g, 3.57 mmol). and DMSO (18 mL) The reaction tube was placed into a pre-heated oil bath and stirred at 90 °C for 8 h under N<sub>2</sub>. Upon completion, 36 mL 2N HCl was added after cooling to room temperature. The resulting mixture was stirred at room temperature for 40 min under air atmosphere before it was quenched with the addition of 2N NaOH (36 mL). Then EtOAc was added to dilute the mixture and washed with NH<sub>3</sub> H<sub>2</sub>O and saturated NaCl (aq), Aqueous phase was extracted with EtOAc three times. Combined organic phase was washed with brine, dried over Na<sub>2</sub>SO<sub>4</sub>, and then filtered, the solvent was removed in a rotary evaporator and purified by a silica gel packed flash chromatography column, using ethyl acetate/hexane as the eluent to afford the product **3a** with 62% yield (652 mg) and diphenylmethanone 91% yield (886 mg).

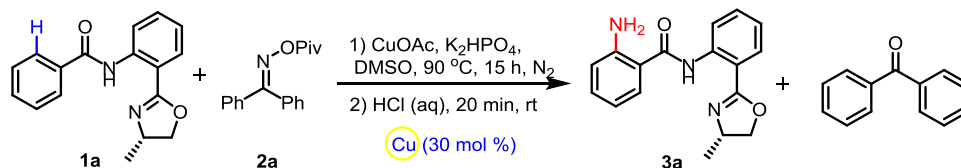

To a 250 mL sealed tube was added substrates **1a** (1.0 g, 3.57 mmol), CuOAc (131.3 mg, 1.67 mmol), K<sub>2</sub>HPO<sub>4</sub> (621 mg, 3.57 mmol), **2a** (1.05 g, 3.57 mmol). and DMSO (18 mL) The reaction tube was placed into a pre-heated oil bath and stirred at 90 °C for 15 h under N<sub>2</sub>. Upon completion, 36 mL 2N HCl was added after cooling to room temperature. The resulting mixture was stirred at room temperature for 40 min under air atmosphere before it was quenched with the addition of 2N NaOH (36 mL). Then EtOAc was added to dilute the mixture and washed with NH<sub>3</sub> H<sub>2</sub>O and saturated NaCl (aq), Aqueous phase was extracted with EtOAc three times. Combined organic phase was washed with brine, dried over Na<sub>2</sub>SO<sub>4</sub>, and then filtered, the solvent was removed in a rotary evaporator and purified by a silica gel packed flash chromatography column, using ethyl acetate/hexane as the eluent to afford the product **3a** with 45% yield (472 mg) and

diphenylmethanone 71% yield (688 mg).

## 2.7 Procedure for Kinetic Isotope Effect Experiments

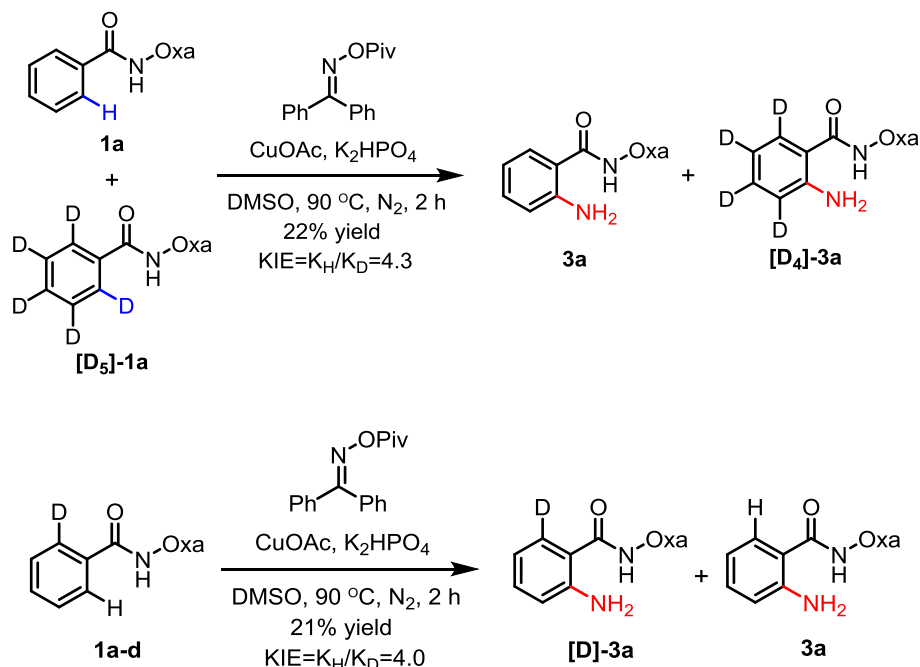

### A. Intermolecular competition experiment between **1a** and **[D<sub>5</sub>]-1a**:

To a 25 mL sealed tube was added substrates (*S*)-N-(2-(4-methyl-4,5-dihydrooxazol-2-yl)phenyl)benzamide **1a** (0.05 mmol, 1 equiv), (*S*)-N-(2-(4-methyl-4,5-dihydrooxazol-2-yl)phenyl)benzamide-2,3,4,5-d<sub>4</sub> **[D<sub>5</sub>]-1a** (0.05 mmol, 1 equiv), CuOAc (0.15 mmol), K<sub>2</sub>HPO<sub>4</sub> (0.1 mmol), DMSO (1 mL). Then the tube was placed into a pre-heated oil bath (90 °C) and stirred for 2 h. Upon completion, 2 mL 2 N HCl was added after cooling to room temperature. The resulting mixture was stirred at room temperature for 20 min under air atmosphere before it was quenched with the addition of 2 N NaOH (2 mL). EtOAc was added to dilute the mixture and then washed with NH<sub>3</sub> H<sub>2</sub>O and saturated NaCl (aq). The organic fraction was dried over Na<sub>2</sub>SO<sub>4</sub>, evaporated and a mixture of product **3a** and **[D<sub>4</sub>]-3a** was purified by flash column chromatography on silica gel with a gradient eluent of hexane and ethyl acetate. The distribution of **3a** and **[D<sub>4</sub>]-3a** was calculated from the integrals of their respective <sup>1</sup>H NMR signals at 7.88 ppm (**3a** and **[D<sub>4</sub>]-3a**) and 7.87 ppm (**3a**) (see Figure S1).

**Figure S1.** Detail of the  $^1\text{H}$  NMR spectrum of the product mixture obtained in the intermolecular KIE experiment

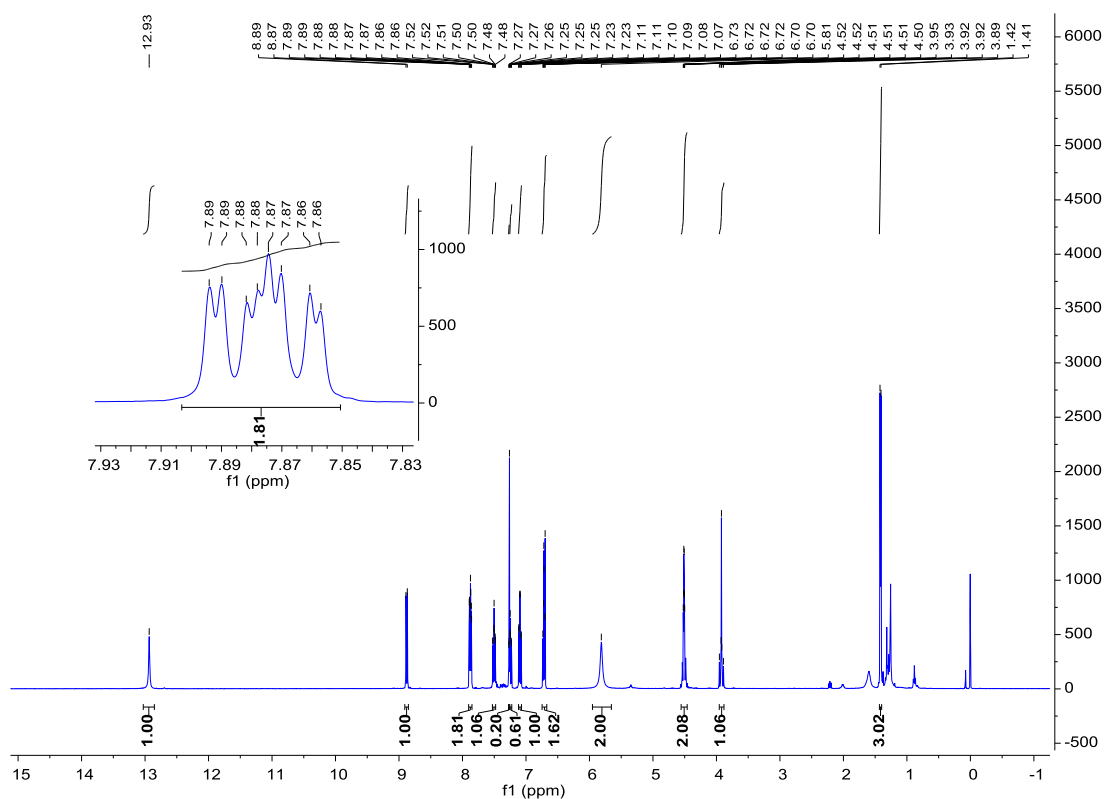

### B. Intramolecular competition experiment between **1a** and **1a-d**:

To a 25 mL sealed tube was added substrates (*S*)-*N*-(2-(4-methyl-4,5-dihydrooxazol-2-yl)phenyl)benzamide-2-d **1a-d** (0.1 mmol, 1 equiv), CuOAc (0.15 mmol),  $\text{K}_2\text{HPO}_4$  (0.1 mmol), DMSO (1 mL). Then the tube was placed into a pre-heated oil bath (90 °C) and stirred for 2 h. Upon completion, 2 mL 2N HCl was added after cooling to room temperature. The resulting mixture was stirred at room temperature for 20 min under air atmosphere before it was quenched with the addition of 2N NaOH (2 mL). EtOAc was added to dilute the mixture and then washed with  $\text{NH}_3 \cdot \text{H}_2\text{O}$  and saturated NaCl (aq). The organic fraction was dried over  $\text{Na}_2\text{SO}_4$ , evaporated and a mixture of product **3a** and [**D**]-**3a** was purified by flash column chromatography on silica gel with a gradient eluent of hexane and ethyl acetate. The distribution of **3a** and [**D**]-**3a** was calculated from the integrals of their respective  $^1\text{H}$  NMR signals at 7.88 ppm (**3a** and [**D**]-**3a**) and 7.87 ppm (**3a**) (see Figure S2).

**Figure S2.** Detail of the  $^1\text{H}$  NMR spectrum of the product mixture obtained in the intramolecular KIE experiment

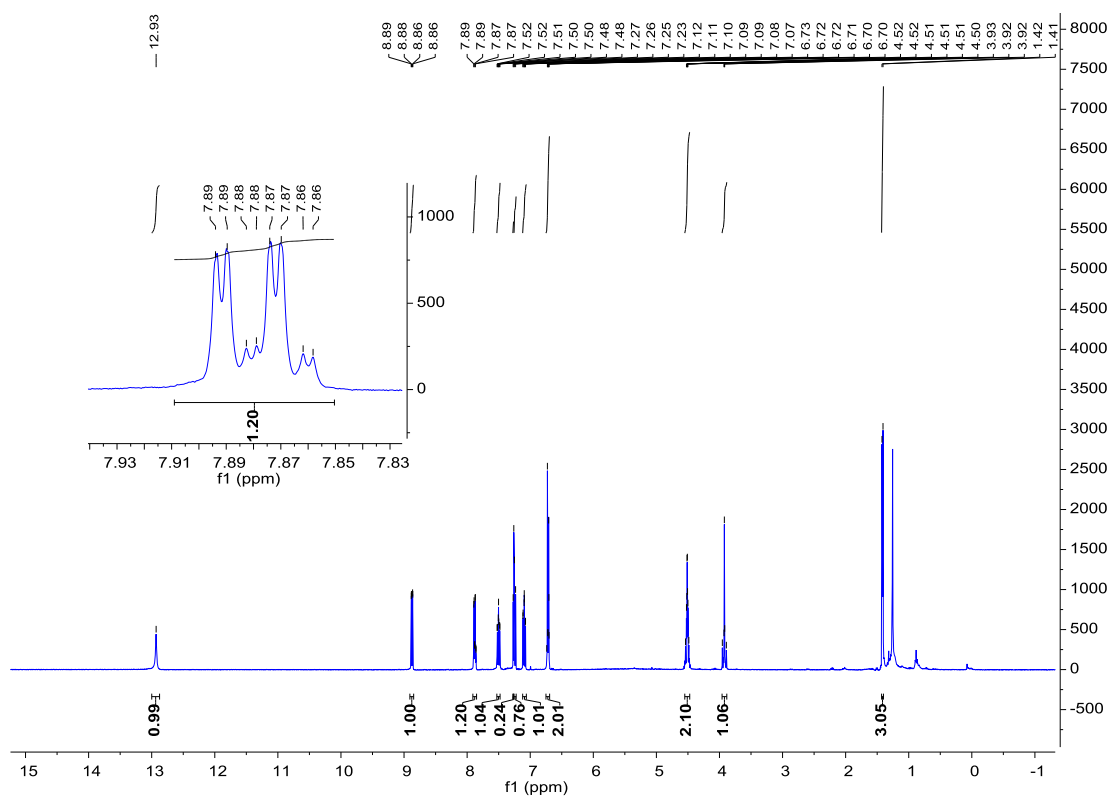

### 3. Analytical Data.

#### 3.1 Characterization of Substrates.

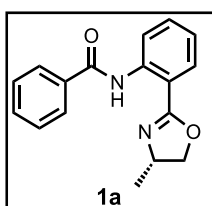

**(S)-N-(2-(4-methyl-4,5-dihydrooxazol-2-yl)phenyl)benzamide (1a):** white solid. Mp =101.2-102.6 °C.  $^1\text{H}$  NMR (400 MHz,  $\text{CDCl}_3$ )  $\delta$  13.14 (s, 1H), 8.98 (d,  $J$  = 8.4, 1H), 8.15 – 8.09 (m, 2H), 7.89 (dd,  $J$  = 7.9, 1.5 Hz, 1H), 7.58 – 7.46 (m, 4H), 7.14 – 7.07 (m, 1H), 4.59 – 4.45 (m, 2H), 3.97 – 3.87 (m, 1H), 1.43 (d,  $J$  = 6.3 Hz, 3H).  $^{13}\text{C}$  NMR (151 MHz,  $\text{CDCl}_3$ )  $\delta$  165.98, 163.61, 140.20, 135.29, 132.61, 131.60, 129.15, 128.43, 127.71, 122.32, 119.71, 113.48, 72.68, 61.91, 21.45. **HRMS** (ESI-TOF)  $m/z$  Calcd for

C<sub>17</sub>H<sub>16</sub>N<sub>2</sub>O<sub>2</sub> [M+H]<sup>+</sup> 281.1285, found 281.1285.

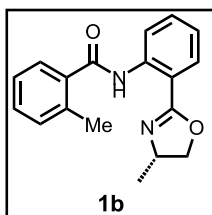

**(S)-2-methyl-N-(2-(4-methyl-4,5-dihydrooxazol-2-yl)phenyl)benzamide (1b):** white solid. Mp=97.8-99.4 °C. <sup>1</sup>H NMR (400 MHz, CDCl<sub>3</sub>) δ 12.73 (s, 1H), 8.95 (d, J = 8.4 Hz, 1H), 7.87 (dd, J = 7.9, 1.6 Hz, 1H), 7.67 (d, J = 8.1 Hz, 1H), 7.57 – 7.47 (m, 1H), 7.39 – 7.32 (m, 1H), 7.31 – 7.23 (m, 2H), 7.17 – 7.07 (m, 1H), 4.51 – 4.23 (m, 2H), 3.88 (t, J = 7.6 Hz, 1H), 2.59 (s, 3H), 1.29 (d, J = 6.4 Hz, 3H). <sup>13</sup>C NMR (126 MHz, CDCl<sub>3</sub>) δ 168.54, 163.30, 140.17, 137.32, 136.57, 132.49, 131.32, 130.10, 129.10, 127.54, 125.54, 122.33, 119.59, 113.41, 72.62, 61.82, 21.34, 20.35. HRMS (ESI-TOF) m/z Calcd for C<sub>18</sub>H<sub>18</sub>N<sub>2</sub>O<sub>2</sub> [M+H]<sup>+</sup> 295.1441, found 295.1441.

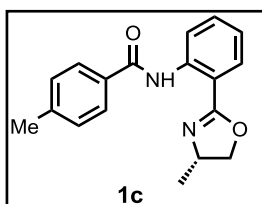

**(S)-4-methyl-N-(2-(4-methyl-4,5-dihydrooxazol-2-yl)phenyl)benzamide (1c):** white solid. Mp=139.4-142.6 °C. <sup>1</sup>H NMR (400 MHz, CDCl<sub>3</sub>) δ 13.07 (s, 1H), 8.98 (dd, J = 8.5, 0.6 Hz, 1H), 8.02 (d, J = 8.2 Hz, 2H), 7.88 (dd, J = 7.9, 1.3 Hz, 1H), 7.56 – 7.47 (m, 1H), 7.33 – 7.27 (m, 2H), 7.13 – 7.07 (m, 1H), 4.66 – 4.42 (m, 2H), 4.07 – 3.83 (m, 1H), 2.43 (s, 3H), 1.43 (d, J = 6.0 Hz, 3H). <sup>13</sup>C NMR (126 MHz, CDCl<sub>3</sub>) δ 166.02, 163.66, 142.05, 140.38, 132.61, 132.58, 129.15, 127.77, 122.17, 119.74, 113.44, 72.70, 61.96, 21.46, 21.44. HRMS (ESI-TOF) m/z Calcd for C<sub>18</sub>H<sub>18</sub>N<sub>2</sub>O<sub>2</sub> [M+H]<sup>+</sup> 295.1441, found 295.1441.

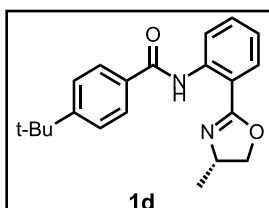

**(S)-4-(tert-butyl)-N-(2-(4-methyl-4,5-dihydrooxazol-2-yl)phenyl)benzamide (1d):** white solid. Mp=113.6-115.1 °C. <sup>1</sup>H NMR (400 MHz, CDCl<sub>3</sub>) δ 13.08 (s, 1H), 8.99 (dd, J = 8.5, 1.1 Hz, 1H), 8.10 – 8.04 (m, 2H), 7.89 (dd, J = 7.9, 1.6 Hz, 1H), 7.53 – 7.49 (m, 3H), 7.10 (td, J = 7.9, 1.2 Hz, 1H), 4.63 – 4.46 (m, 2H), 4.00 – 3.89 (m, 1H), 1.46 (d, J = 6.3 Hz, 3H), 1.37 (s, 9H). <sup>13</sup>C NMR (151 MHz, CDCl<sub>3</sub>) δ 165.95, 163.63, 155.11, 140.37, 132.62, 132.42, 129.16, 127.61, 125.41, 122.18, 119.75, 113.42, 72.68, 61.97, 34.94, 31.17, 21.60. HRMS (ESI-TOF) m/z Calcd for C<sub>21</sub>H<sub>24</sub>N<sub>2</sub>O<sub>2</sub> [M+H]<sup>+</sup> 337.1910, found 337.1991.

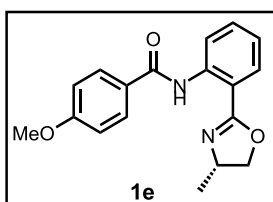

**(S)-4-methoxy-N-(2-(4-methyl-4,5-dihydrooxazol-2-yl)phenyl)benzamide (1e):** white solid. Mp=132.8-134.4 °C. <sup>1</sup>H NMR (400 MHz, CDCl<sub>3</sub>) δ 13.01 (s, 1H), 8.95 (dd, J = 8.5, 1.2 Hz, 1H), 8.12 – 8.06 (m, 2H), 7.88 (dd, J = 7.9, 1.6 Hz, 1H), 7.51 (ddd, J = 8.7, 7.3, 1.7 Hz, 1H), 7.13 – 7.07 (m, 1H), 7.01 – 6.96 (m, 2H), 4.58 – 4.49 (m, 2H), 3.98 – 3.91 (m, 1H), 3.89 (s, 3H), 1.44 (d, J = 6.3 Hz, 3H). <sup>13</sup>C NMR (126 MHz, CDCl<sub>3</sub>) δ 165.67, 163.76, 162.37, 140.49, 132.67, 129.65, 129.18, 127.77, 122.10, 119.73, 113.69, 113.37, 72.71, 61.99, 55.43, 21.56. HRMS (ESI-TOF) m/z Calcd for C<sub>18</sub>H<sub>18</sub>N<sub>2</sub>O<sub>3</sub> [M+H]<sup>+</sup> 311.1390, found 311.1390.

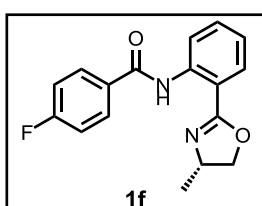

**(S)-4-fluoro-N-(2-(4-methyl-4,5-dihydrooxazol-2-yl)phenyl)benzamide (1f):** white solid. Mp=136.4-137.7 °C. <sup>1</sup>H NMR (400 MHz, CDCl<sub>3</sub>) δ 13.11 (s, 1H), 8.93 (d, J = 8.5 Hz, 1H), 8.18 – 8.09 (m, 2H), 7.93 – 7.86 (m, 1H), 7.52 (t, J = 7.9 Hz, 1H), 7.17 (t, J = 8.6 Hz, 2H), 7.12 (t, J = 7.6 Hz, 1H), 4.60 – 4.45 (m, 2H), 3.98 – 3.89 (m, 1H), 1.43 (d, J = 5.9 Hz, 3H). <sup>13</sup>C NMR (126 MHz, CDCl<sub>3</sub>) δ 164.93, 164.92(d, J<sub>C-F</sub> = 252.6 Hz), 163.84, 140.18, 132.74, 131.60(d, J<sub>C-F</sub> = 2.9 Hz), 130.11(d, J<sub>C-F</sub> = 9.0 Hz), 129.25, 122.48,

119.76, 115.51 (d,  $J_{C-F} = 21.8$  Hz), 113.52, 72.78, 61.96, 21.52. **HRMS** (ESI-TOF)  $m/z$  Calcd for  $C_{17}H_{15}FN_2O_2$   $[M+H]^+$  299.1191, found 299.1190.

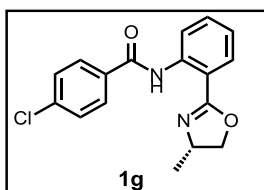

**(S)-4-chloro-N-(2-(4-methyl-4,5-dihydrooxazol-2-yl)phenyl)benzamide (1g):** white solid.  $Mp = 151.2-152.7$  °C.  **$^1H$  NMR** (400 MHz,  $CDCl_3$ )  $\delta$  13.15 (s, 1H), 8.93 (dd,  $J = 8.5, 0.9$  Hz, 1H), 8.10 – 8.04 (m, 2H), 7.89 (dd,  $J = 7.9, 1.6$  Hz, 1H), 7.57 – 7.50 (m, 1H), 7.49 – 7.44 (m, 2H), 7.16 – 7.09 (m, 1H), 4.59 – 4.51 (m, 2H), 4.00 – 3.89 (m, 1H), 1.43 (d,  $J = 6.4$  Hz, 3H).  **$^{13}C$  NMR** (126 MHz,  $CDCl_3$ )  $\delta$  164.90, 163.82, 140.08, 137.92, 133.82, 132.75, 129.25, 129.19, 128.75, 122.57, 119.77, 113.54, 72.78, 61.94, 21.51. **HRMS** (ESI-TOF)  $m/z$  Calcd for  $C_{17}H_{15}ClN_2O_2$   $[M+H]^+$  315.0894, found 315.0895.

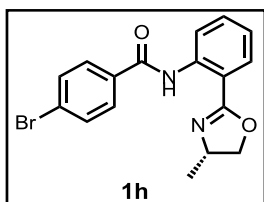

**(S)-4-bromo-N-(2-(4-methyl-4,5-dihydrooxazol-2-yl)phenyl)benzamide (1h):** white solid.  $Mp = 150.9-152.4$  °C.  **$^1H$  NMR** (400 MHz,  $CDCl_3$ )  $\delta$  13.16 (s, 1H), 8.93 (dd,  $J = 8.5, 0.9$  Hz, 1H), 8.03 – 7.96 (m, 2H), 7.89 (dd,  $J = 7.9, 1.6$  Hz, 1H), 7.67 – 7.61 (m, 2H), 7.56 – 7.48 (m, 1H), 7.13 (td,  $J = 7.9, 1.2$  Hz, 1H), 4.58 – 4.48 (m, 2H), 4.04 – 3.87 (m, 1H), 1.43 (d,  $J = 6.5$ , 3H).  **$^{13}C$  NMR** (126 MHz,  $CDCl_3$ )  $\delta$  165.01, 163.81, 140.04, 134.27, 132.75, 131.73, 129.37, 129.25, 126.45, 122.60, 119.77, 113.55, 72.78, 61.93, 21.52. **HRMS** (ESI-TOF)  $m/z$  Calcd for  $C_{17}H_{15}BrN_2O_2$   $[M+H]^+$  359.0389, found 359.0390.

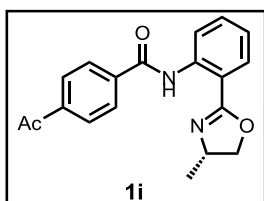



**(S)-4-acetyl-N-(2-(4-methyl-4,5-dihydrooxazol-2-yl)phenyl)benzamide (1i):** white solid. Mp=161.5-162.8 °C.  $^1\text{H NMR}$  (400 MHz,  $\text{CDCl}_3$ )  $\delta$  13.27 (s, 1H), 8.94 (d,  $J$  = 8.5 Hz, 1H), 8.20 (d,  $J$  = 8.3 Hz, 2H), 8.06 (d,  $J$  = 8.3 Hz, 2H), 7.89 (dd,  $J$  = 7.9, 1.6 Hz, 1H), 7.57 – 7.48 (m, 1H), 7.18 – 7.10 (m, 1H), 4.59 – 4.48 (m, 2H), 4.03 – 3.86 (m, 1H), 2.66 (s, 3H), 1.44 (d,  $J$  = 6.4 Hz, 3H).  $^{13}\text{C NMR}$  (126 MHz,  $\text{CDCl}_3$ )  $\delta$  197.55, 164.84, 163.74, 139.90, 139.22, 139.17, 132.71, 129.24, 128.39, 127.99, 122.74, 119.77, 113.63, 72.79, 61.91, 26.80, 21.50. **HRMS** (ESI-TOF)  $m/z$  Calcd for  $\text{C}_{19}\text{H}_{18}\text{N}_2\text{O}_3$   $[\text{M}+\text{H}]^+$  323.1389, found 323.1390.

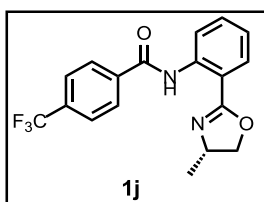

**(S)-N-(2-(4-methyl-4,5-dihydrooxazol-2-yl)phenyl)-4-(trifluoromethyl)benzamide (1j):** white solid.  $^1\text{H NMR}$  (400 MHz,  $\text{CDCl}_3$ )  $\delta$  13.28 (s, 1H), 8.94 (dd,  $J$  = 8.5, 1.0 Hz, 1H), 8.23 (d,  $J$  = 8.1 Hz, 2H), 7.90 (dd,  $J$  = 7.9, 1.6 Hz, 1H), 7.76 (d,  $J$  = 8.2 Hz, 2H), 7.59 – 7.50 (m, 1H), 7.19 – 7.11 (m, 1H), 4.61 – 4.48 (m, 2H), 4.04 – 3.88 (m, 1H), 1.44 (d,  $J$  = 6.4 Hz, 3H).  $^{13}\text{C NMR}$  (126 MHz,  $\text{CDCl}_3$ )  $\delta$  164.54, 163.85, 139.88, 138.64, 133.26 (q,  $J_{\text{C-F}}$  = 33 Hz), 132.80, 129.30, 128.18, 125.51 (q,  $J_{\text{C-F}}$  = 3.8 Hz), 123.86 (q,  $J_{\text{C-F}}$  = 272.4 Hz), 122.85, 119.83, 113.67, 72.82, 61.93, 21.54. **HRMS** (ESI-TOF)  $m/z$  Calcd for  $\text{C}_{18}\text{H}_{15}\text{F}_3\text{N}_2\text{O}_2$   $[\text{M}+\text{H}]^+$  349.1158, found 349.1158.

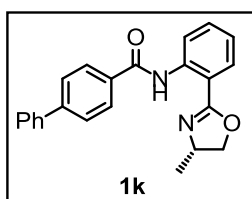

**(S)-N-(2-(4-methyl-4,5-dihydrooxazol-2-yl)phenyl)-[1,1'-biphenyl]-4-carboxamide (1k):** white solid. Mp=130.9-132.2 °C.  $^1\text{H NMR}$  (400 MHz,  $\text{CDCl}_3$ )  $\delta$  13.19 (s, 1H), 9.01 (d,  $J$  = 8.5 Hz, 1H), 8.26 – 8.16 (m, 2H), 7.91 (dd,  $J$  = 7.9, 1.5 Hz, 1H), 7.77 – 7.71 (m, 2H), 7.69 – 7.64 (m, 2H), 7.54 (ddd,  $J$  = 8.7, 7.3, 1.6 Hz, 1H), 7.51 – 7.45 (m, 2H), 7.43 – 7.38 (m, 1H), 7.13 (td,  $J$  = 7.9, 1.2 Hz, 1H), 4.73 – 4.42 (m, 2H), 4.31 – 3.72 (m, 1H), 1.46 (d,  $J$  = 6.4 Hz, 3H).  $^{13}\text{C NMR}$  (151MHz,  $\text{CDCl}_3$ )  $\delta$  165.74, 163.70, 144.35,

140.26, 140.05, 134.03, 132.67, 129.19, 128.86, 128.28, 127.94, 127.20, 127.13, 122.34, 119.75, 113.48, 72.72, 61.96, 21.54. **HRMS** (ESI-TOF)  $m/z$  Calcd for  $C_{23}H_{20}N_2O_2$   $[M+H]^+$  357.1596, found 357.1598.

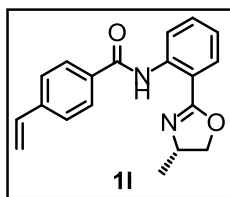

**(S)-N-(2-(4-methyl-4,5-dihydrooxazol-2-yl)phenyl)-4-vinylbenzamide (1l):** white solid.  $M_p=123.1-124.8$  °C.  $^1H$  NMR (400 MHz,  $CDCl_3$ )  $\delta$  13.13 (s, 1H), 8.97 (dd,  $J = 8.5, 1.0$  Hz, 1H), 8.14 – 8.05 (m, 2H), 7.89 (dd,  $J = 7.9, 1.6$  Hz, 1H), 7.57 – 7.47 (m, 3H), 7.11 (ddd,  $J = 8.5, 7.7, 1.2$  Hz, 1H), 6.78 (dd,  $J = 17.6, 10.9$  Hz, 1H), 5.88 (dd,  $J = 17.6, 0.7$  Hz, 1H), 5.38 (dd,  $J = 10.9, 0.6$  Hz, 1H), 4.63 – 4.46 (m, 2H), 3.99 – 3.89 (m, 1H), 1.44 (d,  $J = 6.3$  Hz, 3H).  $^{13}C$  NMR (126 MHz,  $CDCl_3$ )  $\delta$  165.63, 163.70, 140.72, 140.28, 136.04, 134.49, 132.65, 129.19, 128.07, 126.24, 122.32, 119.77, 115.92, 113.49, 72.73, 61.96, 21.51. **HRMS** (ESI-TOF)  $m/z$  Calcd for  $C_{19}H_{18}N_2O_2$   $[M+H]^+$  307.1440, found 307.1441.

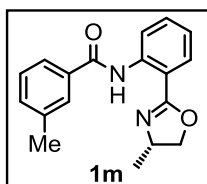

**(S)-3-methyl-N-(2-(4-methyl-4,5-dihydrooxazol-2-yl)phenyl)benzamide (1m):** white solid.  $M_p=78.8-80.2$  °C.  $^1H$  NMR (400 MHz,  $CDCl_3$ )  $\delta$  13.09 (s, 1H), 8.99 (d,  $J = 8.5$  Hz, 1H), 7.99 – 7.85 (m, 3H), 7.57 – 7.47 (m, 1H), 7.43 – 7.32 (m, 2H), 7.16 – 7.05 (m, 1H), 4.60 – 4.44 (m, 2H), 3.99 – 3.89 (m, 1H), 2.45 (s, 3H), 1.45 (d,  $J = 6.3$  Hz, 3H).  $^{13}C$  NMR (126 MHz,  $CDCl_3$ )  $\delta$  166.18, 163.66, 140.32, 138.15, 135.31, 132.63, 132.33, 129.17, 128.38, 128.35, 124.91, 122.25, 119.74, 113.46, 72.69, 61.98, 21.45, 21.43. **HRMS** (ESI-TOF)  $m/z$  Calcd for  $C_{18}H_{18}N_2O_2$   $[M+H]^+$  295.1441, found 295.1441.

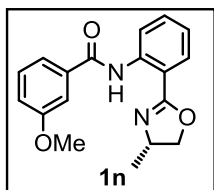

**(S)-3-methoxy-N-(2-(4-methyl-4,5-dihydrooxazol-2-yl)phenyl)benzamide (1n):** white solid. Mp=77.4-78.7 °C.  $^1\text{H NMR}$  (400 MHz,  $\text{CDCl}_3$ )  $\delta$  13.11 (s, 1H), 8.97 (dd,  $J = 8.5, 1.0$  Hz, 1H), 7.89 (dd,  $J = 7.9, 1.5$  Hz, 1H), 7.76 – 7.65 (m, 2H), 7.58 – 7.48 (m, 1H), 7.40 (t,  $J = 7.9$  Hz, 1H), 7.16 – 7.04 (m, 2H), 4.58 – 4.47 (m, 2H), 3.98 – 3.92 (m, 1H), 3.89 (s, 3H), 1.44 (d,  $J = 6.4$  Hz, 3H).  $^{13}\text{C NMR}$  (126 MHz,  $\text{CDCl}_3$ )  $\delta$  165.86, 163.65, 159.84, 140.20, 136.81, 132.67, 129.41, 129.20, 122.39, 119.78, 117.90, 113.54, 112.98, 72.74, 62.00, 55.43, 21.52. **HRMS** (ESI-TOF)  $m/z$  Calcd for  $\text{C}_{18}\text{H}_{18}\text{N}_2\text{O}_3$   $[\text{M}+\text{H}]^+$  311.1391, found 311.1391.

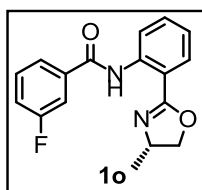

**(S)-3-fluoro-N-(2-(4-methyl-4,5-dihydrooxazol-2-yl)phenyl)benzamide (1o):** white solid. Mp=180.1-181.2 °C.  $^1\text{H NMR}$  (400 MHz,  $\text{CDCl}_3$ )  $\delta$  12.13 (s, 1H), 8.86 – 8.74 (m, 1H), 7.81 – 7.77 (m, 1H), 7.77 – 7.72 (m, 1H), 7.56 (dd,  $J = 12.4, 4.6$  Hz, 2H), 7.49 (td,  $J = 8.0, 5.6$  Hz, 1H), 7.29 – 7.21 (m, 1H), 7.14 (td,  $J = 7.8, 1.1$  Hz, 1H), 4.65 – 4.54 (m, 1H), 3.84 (dd,  $J = 11.2, 4.1$  Hz, 1H), 3.68 (dd,  $J = 11.2, 3.4$  Hz, 1H), 1.40 (d,  $J = 6.7$  Hz, 3H).  $^{13}\text{C NMR}$  (126 MHz,  $\text{CDCl}_3$ )  $\delta$  168.57, 164.19 (d,  $J_{\text{C-F}} = 2.1$  Hz), 162.93 (d,  $J_{\text{C-F}} = 247.6$  Hz), 139.91, 137.20 (d,  $J_{\text{C-F}} = 6.8$  Hz), 133.12, 130.39 (d,  $J_{\text{C-F}} = 7.9$  Hz), 126.58, 123.15, 122.69 (d,  $J_{\text{C-F}} = 3.0$  Hz), 121.64, 119.90, 118.85 (d,  $J_{\text{C-F}} = 21.5$  Hz), 114.85 (d,  $J_{\text{C-F}} = 23.1$  Hz), 49.21, 45.77, 17.93. **HRMS** (ESI-TOF)  $m/z$  Calcd for  $\text{C}_{17}\text{H}_{15}\text{FN}_2\text{O}_2$   $[\text{M}+\text{H}]^+$  299.1192, found 299.1190.

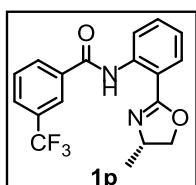

**(S)-N-(2-(4-methyl-4,5-dihydrooxazol-2-yl)phenyl)-3-(trifluoromethyl)benzamide**

**(1p):** white solid. Mp=72.0-73.1 °C. <sup>1</sup>H NMR (400 MHz, CDCl<sub>3</sub>) δ 13.32 (s, 1H), 8.95 (dd, *J* = 8.5, 0.8 Hz, 1H), 8.41 (s, 1H), 8.33 (d, *J* = 7.9 Hz, 1H), 7.90 (d, *J* = 7.9 Hz, 1H), 7.80 (d, *J* = 7.8 Hz, 1H), 7.64 (t, *J* = 7.8 Hz, 1H), 7.53 (t, *J* = 7.9 Hz, 1H), 7.18 – 7.10 (m, 1H), 4.59 – 4.46 (m, 2H), 4.02 – 3.85 (m, 1H), 1.42 (d, *J* = 6.3 Hz, 3H). <sup>13</sup>C NMR (126 MHz, CDCl<sub>3</sub>). δ 164.28, 163.80, 139.89, 136.10, 132.74, 131.50, 130.92 (q, *J* = 32.6 Hz), 129.29, 129.19, 128.15 (q, *J* = 3.7 Hz), 124.32 (q, *J* = 3.8 Hz), 123.89 (d, *J* = 272.3 Hz), 122.77, 119.74, 113.62, 72.84, 61.95, 21.25. **HRMS** (ESI-TOF) *m/z* Calcd for C<sub>18</sub>H<sub>15</sub>F<sub>3</sub>N<sub>2</sub>O<sub>2</sub> [M+H]<sup>+</sup> 349.1158, found 349.1158.

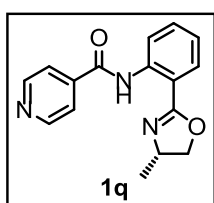

**(S)-N-(2-(4-methyl-4,5-dihydrooxazol-2-yl)phenyl)nicotinamide (1q):** white solid.

Mp=141.0-142.7 °C. <sup>1</sup>H NMR (400 MHz, CDCl<sub>3</sub>) δ 13.36 (s, 1H), 8.92 (dd, *J* = 8.5, 1.1 Hz, 1H), 8.84 – 8.78 (m, 2H), 7.97 – 7.93 (m, 2H), 7.91 (dd, *J* = 7.9, 1.7 Hz, 1H), 7.55 (ddd, *J* = 8.7, 7.3, 1.7 Hz, 1H), 7.17 (m, *J* = 7.6, 1.2 Hz, 1H), 4.6 – 4.52 (m, 2H), 4.03 – 3.86 (m, 1H), 1.45 (d, *J* = 6.3 Hz, 3H). <sup>13</sup>C NMR (126 MHz, CDCl<sub>3</sub>) δ 163.87, 163.80, 150.55, 142.39, 139.55, 132.80, 129.30, 123.09, 121.42, 119.86, 113.72, 72.83, 61.89, 21.52. **HRMS** (ESI-TOF) *m/z* Calcd for C<sub>16</sub>H<sub>15</sub>N<sub>3</sub>O<sub>2</sub> [M+H]<sup>+</sup> 282.1237, found 282.1237.

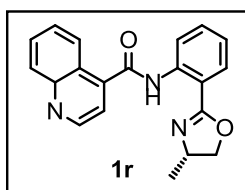

**(S)-N-(2-(4-methyl-4,5-dihydrooxazol-2-yl)phenyl)quinoline-3-carboxamide (1r):**

white solid. Mp=130.0-131.6 °C. <sup>1</sup>H NMR (400 MHz, CDCl<sub>3</sub>) δ 13.20 (s, 1H), 9.02 (dd, *J* = 12.1, 6.4 Hz, 2H), 8.54 (d, *J* = 8.5 Hz, 1H), 8.19 (d, *J* = 8.4 Hz, 1H), 7.91 (dd, *J* = 7.9, 1.7 Hz, 1H), 7.83 – 7.74 (m, 1H), 7.71 (d, *J* = 4.4 Hz, 1H), 7.61 (m, *J* = 19.5, 7.5 Hz, 2H), 7.19 (t, *J* = 7.6 Hz, 1H), 4.45 (t, *J* = 8.7 Hz, 1H), 4.31 (q, *J* = 8.2, 7.7 Hz, 1H), 3.88

(t,  $J = 8.0$  Hz, 1H), 1.20 (d,  $J = 6.6$  Hz, 3H).  $^{13}\text{C}$  NMR (126 MHz,  $\text{CDCl}_3$ )  $\delta$  165.86, 163.42, 149.78, 149.02, 142.08, 139.65, 132.73, 129.88, 129.78, 129.24, 127.57, 125.80, 124.77, 123.17, 119.86, 119.00, 113.70, 72.77, 61.73, 21.34. **HRMS** (ESI-TOF)  $m/z$  Calcd for  $\text{C}_{20}\text{H}_{17}\text{N}_3\text{O}_2$   $[\text{M}+\text{H}]^+$  332.1388, found 332.1394.

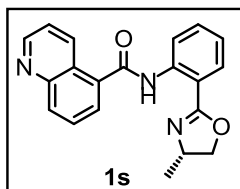

**(S)-N-(2-(4-methyl-4,5-dihydrooxazol-2-yl)phenyl)quinoline-6-carboxamide (1s):** white solid.  $\text{Mp}=143.0\text{-}144.9$  °C.  $^1\text{H}$  NMR (400 MHz,  $\text{CDCl}_3$ )  $\delta$  13.11 (s, 1H), 9.06 (m,  $J = 8.6, 1.7, 0.9$  Hz, 1H), 9.01 (dd,  $J = 8.4, 1.2$  Hz, 1H), 8.97 (dd,  $J = 4.2, 1.7$  Hz, 1H), 8.26 (m,  $J = 8.6, 1.1$  Hz, 1H), 8.03 (dd,  $J = 7.2, 1.3$  Hz, 1H), 7.91 (dd,  $J = 7.9, 1.6$  Hz, 1H), 7.77 (dd,  $J = 8.5, 7.2$  Hz, 1H), 7.57 (m,  $J = 8.8, 7.4, 1.7$  Hz, 1H), 7.49 (dd,  $J = 8.7, 4.2$  Hz, 1H), 7.17 (m,  $J = 7.7, 1.2$  Hz, 1H), 4.47 (dd,  $J = 9.4, 8.0$  Hz, 1H), 4.42 – 4.30 (m, 1H), 3.90 (t,  $J = 7.9$  Hz, 1H), 1.27 (d,  $J = 6.5$  Hz, 3H).  $^{13}\text{C}$  NMR (151 MHz,  $\text{CDCl}_3$ )  $\delta$  166.84, 163.43, 150.73, 148.33, 139.98, 134.54, 134.52, 132.65, 129.20, 128.08, 126.45, 126.25, 122.79, 121.91, 119.64, 113.56, 72.69, 61.76, 21.38. **HRMS** (ESI-TOF)  $m/z$  Calcd for  $\text{C}_{20}\text{H}_{17}\text{N}_3\text{O}_2$   $[\text{M}+\text{H}]^+$  332.1388, found 332.1394.

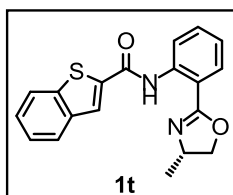

**(S)-N-(2-(4-methyl-4,5-dihydrooxazol-2-yl)phenyl)benzo[b]thiophene-2-carboxamide (1t):** white solid.  $\text{Mp}=150.8\text{-}151.9$  °C.  $^1\text{H}$  NMR (400 MHz,  $\text{CDCl}_3$ )  $\delta$  13.34 (s, 1H), 8.88 (dd,  $J = 8.5, 1.2$  Hz, 1H), 8.08 (d,  $J = 0.8$  Hz, 1H), 7.93 – 7.84 (m, 3H), 7.53 (m,  $J = 8.7, 7.3, 1.7$  Hz, 1H), 7.43 (m,  $J = 7.2, 5.6$  Hz, 2H), 7.13 (m,  $J = 7.6, 1.2$  Hz, 1H), 4.67 – 4.51 (m, 2H), 3.97 (t,  $J = 7.5$  Hz, 1H), 1.52 (d,  $J = 6.4$  Hz, 3H).  $^{13}\text{C}$  NMR (151 MHz,  $\text{CDCl}_3$ )  $\delta$  163.76, 161.09, 141.42, 140.86, 139.83, 139.23, 132.72, 129.20, 126.26, 125.56, 125.06, 124.75, 122.76, 122.55, 119.66, 113.30, 72.79, 61.96, 21.55. **HRMS** (ESI-TOF)  $m/z$  Calcd for  $\text{C}_{19}\text{H}_{16}\text{N}_2\text{O}_2\text{S}$   $[\text{M}+\text{H}]^+$  337.1005, found 337.1005.

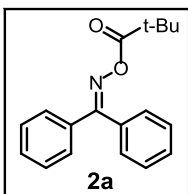

**diphenylmethanone O-pivaloyl oxime (2a):** white solid.<sup>7</sup>  $^1\text{H NMR}$  (400 MHz,  $\text{CDCl}_3$ )  $\delta$  7.62 (dd,  $J = 8.4, 1.4$  Hz, 2H), 7.48 – 7.41 (m, 4H), 7.39 – 7.33 (m, 2H), 7.32 – 7.27 (m, 2H), 1.09 (s, 9H).

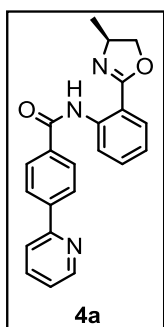

**(S)-N-(2-(4-methyl-4,5-dihydrooxazol-2-yl)phenyl)-4-(pyridin-2-yl)benzamide (4a):** white solid.  $\text{Mp} = 133.0\text{--}134.0$  °C.  $^1\text{H NMR}$  (400 MHz,  $\text{CDCl}_3$ )  $\delta$  13.23 (s, 1H), 8.99 (dd,  $J = 8.5, 1.2$  Hz, 1H), 8.76 – 8.72 (m, 1H), 8.27 – 8.22 (m, 2H), 8.16 – 8.12 (m, 2H), 7.90 (dd,  $J = 7.9, 1.6$  Hz, 1H), 7.81 (m,  $J = 8.0, 6.3, 1.4$  Hz, 2H), 7.54 (m,  $J = 8.8, 7.3, 1.7$  Hz, 1H), 7.29 (m,  $J = 6.7, 4.8, 2.0$  Hz, 1H), 7.13 (m,  $J = 7.6, 1.2$  Hz, 1H), 4.59 – 4.50 (m, 2H), 4.00 – 3.92 (m, 1H), 1.47 (d,  $J = 6.2$  Hz, 3H).  $^{13}\text{C NMR}$  (151 MHz,  $\text{CDCl}_3$ )  $\delta$  165.56, 163.64, 156.21, 149.77, 142.20, 140.18, 136.85, 135.48, 132.63, 129.17, 128.22, 126.88, 122.69, 122.38, 120.85, 119.73, 113.50, 72.71, 61.92, 21.53. **HRMS** (ESI-TOF)  $m/z$  Calcd for  $\text{C}_{22}\text{H}_{19}\text{N}_3\text{O}_2$   $[\text{M}+\text{H}]^+$  358.1549, found 358.1550.

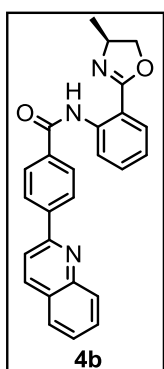

**(S)-N-(2-(4-methyl-4,5-dihydrooxazol-2-yl)phenyl)-4-(quinolin-2-yl)benzamide (4b):** white solid. Mp=170.1-171.0 °C. <sup>1</sup>H NMR (400 MHz, CDCl<sub>3</sub>) δ 13.26 (s, 1H), 9.01 (dd, *J* = 8.5, 1.2 Hz, 1H), 8.34 (d, *J* = 8.4 Hz, 2H), 8.26 (dd, *J* = 8.5, 4.8 Hz, 3H), 8.20 (dd, *J* = 8.4, 1.0 Hz, 1H), 7.95 (dd, *J* = 8.6, 1.6 Hz, 1H), 7.91 (dd, *J* = 7.9, 1.6 Hz, 1H), 7.86 (dd, *J* = 8.2, 1.4 Hz, 1H), 7.76 (ddd, *J* = 8.4, 6.9, 1.5 Hz, 1H), 7.59-7.52 (m, 2H), 7.14 (td, *J* = 7.7, 1.1 Hz, 1H), 4.63 – 4.47 (m, 2H), 3.99 – 3.94 (m, 1H), 1.47 (d, *J* = 6.3 Hz, 3H). <sup>13</sup>C NMR (151 MHz, CDCl<sub>3</sub>) δ 165.63, 163.71, 156.18, 148.27, 142.52, 140.23, 136.98, 135.82, 132.70, 129.87, 129.76, 129.22, 128.33, 127.61, 127.51, 127.37, 126.67, 122.46, 119.82, 118.98, 113.57, 72.77, 61.99, 21.64. HRMS (ESI-TOF) *m/z* Calcd for C<sub>26</sub>H<sub>21</sub>N<sub>3</sub>O<sub>2</sub> [M+H]<sup>+</sup> 673.3286, found 673.3279.

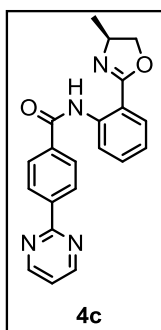

**(S)-N-(2-(4-methyl-4,5-dihydrooxazol-2-yl)phenyl)-4-(pyrimidin-2-yl)benzamide (4c):** white solid. Mp=157.2-158.3 °C. <sup>1</sup>H NMR (400 MHz, CDCl<sub>3</sub>) δ 13.27 (s, 1H), 9.00 (dd, *J* = 8.5, 1.1 Hz, 1H), 8.87 (d, *J* = 4.9 Hz, 2H), 8.61 – 8.56 (m, 2H), 8.29 – 8.24 (m, 2H), 7.91 (dd, *J* = 7.9, 1.6 Hz, 1H), 7.55 (d, *J* = 1.4 Hz, 1H), 7.26 (t, *J* = 4.9 Hz, 1H), 7.14 (ddd, *J* = 7.9, 7.4, 1.2 Hz, 1H), 4.58 – 4.51 (m, 2H), 4.02 – 3.91 (m, 1H), 1.48 (d, *J* = 6.4 Hz, 3H). <sup>13</sup>C NMR (151 MHz, CDCl<sub>3</sub>) δ 165.57, 163.91, 163.71, 157.34, 140.39, 140.19, 137.17, 132.72, 129.21, 128.24, 128.09, 122.49, 119.82, 119.57, 113.57, 72.79, 61.99, 21.58. HRMS (ESI-TOF) *m/z* Calcd for C<sub>21</sub>H<sub>18</sub>N<sub>4</sub>O<sub>2</sub> [M+H]<sup>+</sup> 359.1497, found 359.1503.

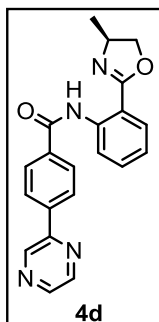

**(S)-N-(2-(4-methyl-4,5-dihydrooxazol-2-yl)phenyl)-4-(pyrazin-2-yl)benzamide (4d):** white solid. Mp=184.3-185.9 °C.  $^1\text{H NMR}$  (400 MHz,  $\text{CDCl}_3$ )  $\delta$  13.26 (s, 1H), 9.12 (d,  $J = 1.5$  Hz, 1H), 8.99 (dd,  $J = 8.7, 1.2$  Hz, 1H), 8.69 (dd,  $J = 2.5, 1.6$  Hz, 1H), 8.57 (d,  $J = 2.5$  Hz, 1H), 8.31 – 8.25 (m, 2H), 8.20 – 8.14 (m, 2H), 7.94 – 7.88 (m, 1H), 7.54 (ddd,  $J = 8.7, 7.3, 1.7$  Hz, 1H), 7.14 (ddd,  $J = 7.9, 7.3, 1.2$  Hz, 1H), 4.58 – 4.52 (m, 2H), 3.99 – 3.94 (m, 1H), 1.47 (d,  $J = 6.3$  Hz, 3H).  $^{13}\text{C NMR}$  (151 MHz,  $\text{CDCl}_3$ )  $\delta$  165.29, 163.77, 151.76, 144.31, 143.55, 142.43, 140.11, 139.19, 136.50, 132.75, 129.24, 128.52, 126.99, 122.58, 119.81, 113.58, 72.78, 61.97, 21.61. **HRMS** (ESI-TOF)  $m/z$  Calcd for  $\text{C}_{21}\text{H}_{18}\text{N}_4\text{O}_2$   $[\text{M}+\text{H}]^+$  359.1496, found 359.1503.

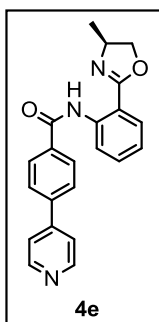

**(S)-N-(2-(4-methyl-4,5-dihydrooxazol-2-yl)phenyl)-4-(pyridin-4-yl)benzamide (4e):** white solid. Mp=182.0-183.2 °C.  $^1\text{H NMR}$  (400 MHz,  $\text{CDCl}_3$ )  $\delta$  13.23 (s, 1H), 8.98 (dd,  $J = 8.5, 1.1$  Hz, 1H), 8.71 (s, 2H), 8.24 – 8.20 (m, 2H), 7.90 (dd,  $J = 7.9, 1.7$  Hz, 1H), 7.79 – 7.73 (m, 2H), 7.61 – 7.50 (m, 3H), 7.13 (td,  $J = 7.7, 1.2$  Hz, 1H), 4.56 – 4.49 (m, 2H), 4.00 – 3.91 (m, 1H), 1.46 (d,  $J = 6.2$  Hz, 3H).  $^{13}\text{C NMR}$  (151 MHz,  $\text{CDCl}_3$ )  $\delta$  165.27, 163.80, 150.40, 147.27, 141.21, 140.11, 135.81, 132.77, 129.26, 128.58, 127.15, 122.59, 121.68, 119.80, 113.55, 72.77, 61.96, 21.60. **HRMS** (ESI-TOF)  $m/z$  Calcd for  $\text{C}_{22}\text{H}_{19}\text{N}_3\text{O}_2$   $[\text{M}+\text{H}]^+$  358.1548, found 358.1550.



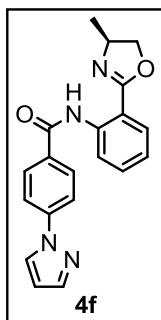

**(S)-N-(2-(4-methyl-4,5-dihydrooxazol-2-yl)phenyl)-4-(1H-pyrazol-1-yl)benzamide**

**(4f):** white solid. Mp=179.3-180.8 °C. <sup>1</sup>H NMR (400 MHz, CDCl<sub>3</sub>) δ 13.19 (s, 1H), 8.96 (dd, *J* = 8.5, 1.1 Hz, 1H), 8.26 – 8.19 (m, 2H), 8.02 (dd, *J* = 2.6, 0.6 Hz, 1H), 7.89 (dd, *J* = 7.9, 1.7 Hz, 1H), 7.86 – 7.82 (m, 2H), 7.77 (dd, *J* = 1.8, 0.6 Hz, 1H), 7.53 (ddd, *J* = 8.8, 7.3, 1.7 Hz, 1H), 7.12 (ddd, *J* = 7.9, 7.3, 1.2 Hz, 1H), 6.51 (dd, *J* = 2.5, 1.8 Hz, 1H), 4.58 – 4.48 (m, 2H), 3.99 – 3.90 (m, 1H), 1.45 (d, *J* = 6.3 Hz, 3H). <sup>13</sup>C NMR (151 MHz, CDCl<sub>3</sub>) δ 165.01, 163.78, 142.33, 141.76, 140.16, 133.02, 132.73, 129.27, 129.23, 126.82, 122.47, 119.74, 118.48, 113.50, 108.31, 72.77, 61.95, 21.56. **HRMS** (ESI-TOF) *m/z* Calcd for C<sub>20</sub>H<sub>18</sub>N<sub>4</sub>O<sub>2</sub> [M+H]<sup>+</sup> 347.1497, found 347.1503.

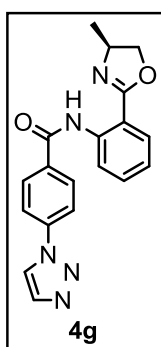

**(S)-N-(2-(4-methyl-4,5-dihydrooxazol-2-yl)phenyl)-4-(1H-1,2,3-triazol-1-yl)benzamide**

**(4g):** white solid. Mp=177.3-179.2 °C. <sup>1</sup>H NMR (400 MHz, CDCl<sub>3</sub>) δ 13.24 (s, 1H), 8.98 (dd, *J* = 8.5, 1.1 Hz, 1H), 8.29 – 8.20 (m, 4H), 7.92 (dd, *J* = 7.9, 1.7 Hz, 1H), 7.88 (s, 2H), 7.54 (ddd, *J* = 8.7, 7.5, 1.6 Hz, 1H), 7.14 (ddd, *J* = 7.9, 7.4, 1.2 Hz, 1H), 4.60 – 4.50 (m, 2H), 4.01 – 3.91 (s, 1H), 1.47 (d, *J* = 6.3 Hz, 3H). <sup>13</sup>C NMR (151 MHz, CDCl<sub>3</sub>) δ 164.93, 163.80, 141.85, 140.12, 136.12, 134.22, 132.75, 129.24, 129.11, 122.53, 119.76, 118.66, 113.53, 72.79, 61.96, 21.55. **HRMS** (ESI-TOF) *m/z* Calcd for C<sub>19</sub>H<sub>17</sub>N<sub>5</sub>O<sub>2</sub> [M+H]<sup>+</sup> 348.1449, found 348.1455.

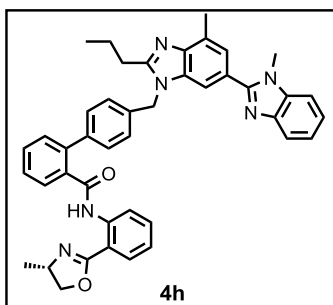

**(S)-4'-((1,7'-dimethyl-2'-propyl-1H,3'H-[2,5'-bibenzo[d]imidazol]-3'-yl)methyl)-N-(2-(4-methyl-4,5-dihydrooxazol-2-yl)phenyl)-[1,1'-biphenyl]-2-carboxamide (4h):** white sticky foam.  $^1\text{H NMR}$  (400 MHz,  $\text{CDCl}_3$ )  $\delta$  12.47 (s, 1H), 8.69 (d,  $J = 8.4$  Hz, 1H), 7.82 – 7.77 (m, 1H), 7.73 – 7.69 (m, 2H), 7.49 (td,  $J = 7.5, 1.5$  Hz, 1H), 7.46 – 7.34 (m, 8H), 7.31 – 7.28 (m, 2H), 7.05 – 6.97 (m, 3H), 5.37 (s, 2H), 4.32 – 4.16 (m, 2H), 3.80 – 3.71 (m, 4H), 2.89 – 2.79 (m, 2H), 2.75 (s, 3H), 1.86 – 1.73 (m, 2H), 1.18 (d,  $J = 6.4$  Hz, 3H), 0.99 (t,  $J = 7.3$  Hz, 3H).  $^{13}\text{C NMR}$  (126 MHz,  $\text{CDCl}_3$ )  $\delta$  168.36, 162.94, 156.45, 154.66, 143.08, 142.91, 140.37, 139.78, 139.73, 136.85, 136.67, 134.98, 134.75, 132.38, 130.51, 130.19, 129.43, 129.30, 128.97, 128.30, 127.41, 125.98, 123.87, 122.43, 122.41, 122.25, 119.55, 113.31, 109.48, 108.75, 72.48, 61.72, 45.94, 31.82, 29.77, 21.79, 21.38, 16.86, 14.02. **HRMS** (ESI-TOF)  $m/z$  Calcd for  $\text{C}_{43}\text{H}_{40}\text{N}_6\text{O}_2$   $[\text{M}+\text{H}]^+$  673.3286, found 673.3279.

### 3.2 Characterization of Products 3a-3t,5a-5h,6a-6k,7,8,9

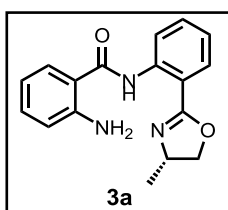

**(S)-2-amino-N-(2-(4-methyl-4,5-dihydrooxazol-2-yl)phenyl)benzamide (3a):** white solid.  $\text{Mp} = 109.1\text{--}110.4$  °C.  $^1\text{H NMR}$  (400 MHz,  $\text{CDCl}_3$ )  $\delta$  12.93 (s, 1H), 8.88 (dd,  $J = 8.5, 1.1$  Hz, 1H), 7.86 (ddd,  $J = 8.2, 2.9, 1.5$  Hz, 2H), 7.49 (ddd,  $J = 8.8, 7.3, 1.7$  Hz, 1H), 7.26 – 7.19 (m, 1H), 7.07 (td,  $J = 7.6, 1.2$  Hz, 1H), 6.70 (t,  $J = 7.5$  Hz, 2H), 5.82 (s, br, 2H), 4.53 – 4.41 (m, 2H), 3.94 – 3.83 (m, 1H), 1.39 (d,  $J = 6.3$  Hz, 3H).  $^{13}\text{C NMR}$  (151 MHz,  $\text{CDCl}_3$ )  $\delta$  168.59, 163.53, 149.87, 140.36, 132.49, 132.45, 129.17, 128.44, 122.02, 119.62, 117.35, 116.26, 116.16, 113.52, 72.71, 61.94, 21.42. **HRMS** (ESI-TOF)  $m/z$

Calcd for C<sub>17</sub>H<sub>17</sub>N<sub>3</sub>O<sub>2</sub> [M+H]<sup>+</sup> 296.1395, found 296.1394.

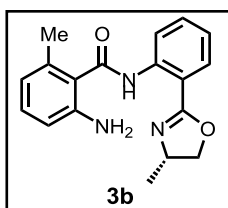

**(S)-2-amino-6-methyl-N-(2-(4-methyl-4,5-dihydrooxazol-2-yl)phenyl)benzamide**

**(3b):** white solid. Mp = 95.6–96.9 °C. <sup>1</sup>H NMR (400 MHz, CDCl<sub>3</sub>) δ 12.60 (s, 1H), 8.97 (d, J = 8.4 Hz, 1H), 7.87 (dd, J = 7.9, 1.7 Hz, 1H), 7.52 (ddd, J = 8.8, 7.4, 1.7 Hz, 1H), 7.12 (td, J = 7.7, 1.2 Hz, 1H), 7.07 (t, J = 7.8 Hz, 1H), 6.65 – 6.54 (m, 2H), 4.37 – 4.30 (m, 2H), 3.87 (t, J = 7.7 Hz, 1H), 2.43 (s, 3H), 1.24 (d, J = 6.5 Hz, 3H). <sup>13</sup>C NMR (126 MHz, CDCl<sub>3</sub>) δ 168.40, 163.01, 145.34, 139.75, 135.36, 132.49, 130.08, 129.16, 123.40, 122.58, 120.32, 119.78, 113.90, 113.53, 72.62, 61.82, 21.25, 20.67. HRMS (ESI-TOF) m/z Calcd for C<sub>18</sub>H<sub>19</sub>N<sub>3</sub>O<sub>2</sub> [M+H]<sup>+</sup> 310.1546, found 310.1550.

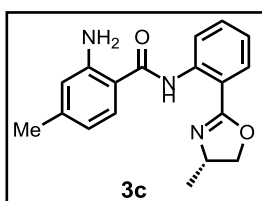

**(S)-2-amino-4-methyl-N-(2-(4-methyl-4,5-dihydrooxazol-2-yl)phenyl)benzamide**

**(3c):** white solid. Mp = 135.6–136.9 °C. <sup>1</sup>H NMR (400 MHz, CDCl<sub>3</sub>) δ 12.88 (s, 1H), 8.87 (dd, J = 8.5, 1.1 Hz, 1H), 7.87 (dd, J = 7.9, 1.7 Hz, 1H), 7.77 (d, J = 8.0 Hz, 1H), 7.49 (ddd, J = 8.7, 7.3, 1.7 Hz, 1H), 7.08 (ddd, J = 7.9, 7.3, 1.2 Hz, 1H), 6.56 – 6.50 (m, 2H), 5.81 (s, br, 2H), 4.57 – 4.44 (m, 2H), 3.97 – 3.87 (m, 1H), 2.29 (s, 3H), 1.42 (d, J = 6.3 Hz, 3H). <sup>13</sup>C NMR (126 MHz, CDCl<sub>3</sub>) δ 168.61, 163.57, 150.05, 143.09, 140.52, 132.44, 129.17, 128.45, 121.86, 119.62, 117.65, 117.60, 113.60, 113.46, 72.71, 61.98, 21.45, 21.41. HRMS (ESI-TOF) m/z Calcd for C<sub>18</sub>H<sub>19</sub>N<sub>3</sub>O<sub>2</sub> [M+H]<sup>+</sup> 310.1550, found 310.1550.

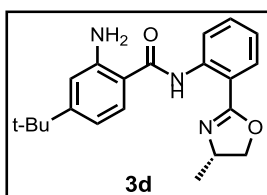

**(S)-2-amino-4-(tert-butyl)-N-(2-(4-methyl-4,5-dihydrooxazol-2-yl)phenyl)benzamide (3d):** white solid. Mp = 124.5-125.6 °C. <sup>1</sup>H NMR (400 MHz, CDCl<sub>3</sub>) δ 12.88 (s, 1H), 8.89 (dd, *J* = 8.5, 1.1 Hz, 1H), 7.88 (dd, *J* = 7.9, 1.6 Hz, 1H), 7.83 (d, *J* = 8.5 Hz, 1H), 7.49 (ddd, *J* = 8.8, 7.3, 1.7 Hz, 1H), 7.08 (ddd, *J* = 7.9, 7.3, 1.2 Hz, 1H), 6.75 (dd, *J* = 8.5, 1.9 Hz, 1H), 6.71 (d, *J* = 1.9 Hz, 1H), 5.85 (s, br, 2H), 4.56 – 4.48 (m, 2H), 3.97 – 3.88 (m, 1H), 1.44 (d, *J* = 6.3 Hz, 3H). <sup>13</sup>C NMR (126 MHz, CDCl<sub>3</sub>) δ 168.50, 163.54, 156.12, 149.94, 140.53, 132.44, 129.17, 128.20, 121.85, 119.64, 114.25, 114.10, 113.45, 113.41, 72.70, 61.99, 34.69, 30.93, 21.55. HRMS (ESI-TOF) *m/z* Calcd for C<sub>21</sub>H<sub>25</sub>N<sub>3</sub>O<sub>2</sub> [M+H]<sup>+</sup> 352.2019, found 352.2020.

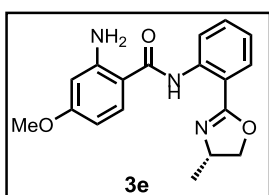

**(S)-2-amino-4-methoxy-N-(2-(4-methyl-4,5-dihydrooxazol-2-yl)phenyl)benzamide (3e):** white solid. Mp = 103.4-104.8 °C. <sup>1</sup>H NMR (400 MHz, CDCl<sub>3</sub>) δ 12.81 (s, 1H), 8.84 (dd, *J* = 8.5, 1.1 Hz, 1H), 7.87 (dd, *J* = 7.9, 1.7 Hz, 1H), 7.82 (d, *J* = 8.9 Hz, 1H), 7.49 (d, *J* = 1.5 Hz, 1H), 7.07 (d, *J* = 1.2 Hz, 1H), 6.29 (dd, *J* = 8.9, 2.5 Hz, 1H), 6.16 (d, *J* = 2.5 Hz, 1H), 5.98 (s, br, 2H), 4.55 – 4.46 (m, 2H), 3.95 – 3.87 (m, 1H), 3.80 (s, 3H), 1.41 (d, *J* = 5.8 Hz, 3H). <sup>13</sup>C NMR (151 MHz, CDCl<sub>3</sub>) δ 168.33, 163.60, 163.03, 152.12, 140.60, 132.42, 130.22, 129.15, 121.70, 119.54, 113.34, 109.38, 104.11, 100.29, 72.68, 61.95, 55.13, 21.46. HRMS (ESI-TOF) *m/z* Calcd for C<sub>18</sub>H<sub>19</sub>N<sub>3</sub>O<sub>3</sub> [M+H]<sup>+</sup> 326.1499, found 326.1499.

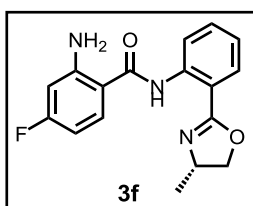

**(S)-2-amino-4-fluoro-N-(2-(4-methyl-4,5-dihydrooxazol-2-yl)phenyl)benzamide (3f):** white solid. Mp = 126.2-127.9 °C. <sup>1</sup>H NMR (400 MHz, CDCl<sub>3</sub>) δ 12.90 (s, 1H), 8.83 (dd, *J* = 8.6, 1.1 Hz, 1H), 7.87 (ddd, *J* = 9.8, 6.7, 4.0 Hz, 2H), 7.50 (ddd, *J* = 8.8, 7.3, 1.7 Hz, 1H), 7.09 (td, *J* = 7.5, 1.2 Hz, 1H), 6.43 – 6.34 (m, 2H), 6.01 (s, br, 2H), 4.56 – 4.42 (m,

2H), 3.97 – 3.88 (m, 1H), 1.40 (d,  $J = 6.0$  Hz, 3H).  $^{13}\text{C}$  NMR (126 MHz,  $\text{CDCl}_3$ )  $\delta$  167.83 , 165.48 (d,  $J = 249.9$  Hz), 163.65 , 152.15 (d,  $J = 12.0$  Hz), 140.27 , 132.48 , 130.77 (d,  $J = 11.2$  Hz), 129.20 , 122.09 , 119.57 , 113.48 , 112.61 (d,  $J = 1.6$  Hz), 103.82 (d,  $J = 22.5$  Hz), 102.85 (d,  $J = 24.0$  Hz). 72.73, 61.90, 21.40.  $^{19}\text{F}$  NMR (471 MHz,  $\text{CDCl}_3$ )  $\delta$  -107.97 (s). HRMS (ESI-TOF)  $m/z$  Calcd for  $\text{C}_{17}\text{H}_{16}\text{FN}_3\text{O}_2$   $[\text{M}+\text{H}]^+$  314.1300, found 314.1299.

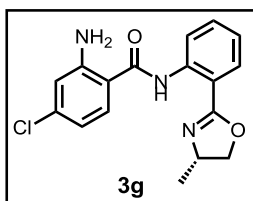

**(S)-2-amino-4-chloro-N-(2-(4-methyl-4,5-dihydrooxazol-2-yl)phenyl)benzamide**

**(3g)**: white solid. Mp = 114.0–115.9 °C.  $^1\text{H}$  NMR (400 MHz,  $\text{CDCl}_3$ )  $\delta$  12.95 (s, 1H), 8.83 (dd,  $J = 8.5, 1.1$  Hz, 1H), 7.88 (dd,  $J = 7.9, 1.7$  Hz, 1H), 7.79 (d,  $J = 8.5$  Hz, 1H), 7.50 (ddd,  $J = 8.7, 7.4, 1.7$  Hz, 1H), 7.10 (td,  $J = 7.7, 1.2$  Hz, 1H), 6.70 (d,  $J = 2.1$  Hz, 1H), 6.67 (dd,  $J = 8.4, 2.1$  Hz, 1H), 5.92 (s, br, 2H), 4.55 – 4.48 (m, 2H), 3.98 – 3.89 (m, 1H), 1.41 (d,  $J = 6.3$  Hz, 3H).  $^{13}\text{C}$  NMR (126 MHz,  $\text{CDCl}_3$ )  $\delta$  167.85, 163.69, 150.85, 140.19, 138.34, 132.56, 129.78, 129.25, 122.26, 119.63, 116.59, 116.49, 114.63, 113.55, 72.78, 61.94, 21.48. HRMS (ESI-TOF)  $m/z$  Calcd for  $\text{C}_{17}\text{H}_{16}\text{ClN}_3\text{O}_2$   $[\text{M}+\text{H}]^+$  330.1003, found 330.1004.

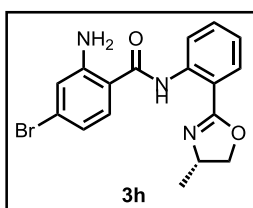

**(S)-2-amino-4-bromo-N-(2-(4-methyl-4,5-dihydrooxazol-2-yl)phenyl)benzamide**

**(3h)**: white solid. Mp = 117.8–119.1 °C.  $^1\text{H}$  NMR (400 MHz,  $\text{CDCl}_3$ )  $\delta$  12.96 (s, 1H), 8.83 (dd,  $J = 8.6, 1.1$  Hz, 1H), 7.88 (dd,  $J = 7.9, 1.7$  Hz, 1H), 7.71 (d,  $J = 8.6$  Hz, 1H), 7.50 (t,  $J = 1.5$  Hz, 1H), 7.10 (td,  $J = 7.6, 1.2$  Hz, 1H), 6.87 (d,  $J = 1.9$  Hz, 1H), 6.82 (dd,  $J = 8.5, 1.9$  Hz, 1H), 5.90 (s, br, 2H), 4.55 – 4.47 (m, 2H), 3.96 – 3.88 (m, 1H), 1.41 (d,  $J = 6.3$  Hz, 3H).  $^{13}\text{C}$  NMR (126 MHz,  $\text{CDCl}_3$ )  $\delta$  167.92, 163.67, 150.91, 140.16, 132.54, 129.80, 129.24, 126.86, 122.26, 119.62, 119.30, 114.99, 113.55, 72.78, 61.93, 21.46.

**HRMS** (ESI-TOF)  $m/z$  Calcd for  $C_{17}H_{16}BrN_3O_2$   $[M+H]^+$  374.0495, found 374.0499.

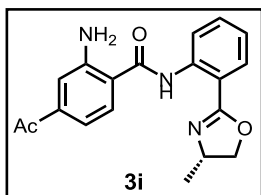

**(S)-4-acetyl-2-amino-N-(2-(4-methyl-4,5-dihydrooxazol-2-yl)phenyl)benzamide (3i):**

white solid.  $M_p$  = 138.5-139.8 °C.  $^1H$  NMR (500 MHz,  $CDCl_3$ )  $\delta$  13.05 (s, 1H), 8.87 (dd,  $J$  = 8.4, 1.1 Hz, 1H), 7.93 (d,  $J$  = 8.2 Hz, 1H), 7.89 (dd,  $J$  = 7.9, 1.7 Hz, 1H), 7.51 (ddd,  $J$  = 8.8, 7.3, 1.7 Hz, 1H), 7.28 – 7.23 (m, 2H), 7.12 (td,  $J$  = 7.7, 1.2 Hz, 1H), 5.91 (s, br, 2H), 4.54 – 4.47 (m, 2H), 3.97 – 3.90 (m, 1H), 2.59 (s, 3H), 1.42 (d,  $J$  = 5.9 Hz, 3H).  $^{13}C$  NMR (126 MHz,  $CDCl_3$ )  $\delta$  197.98, 167.72, 163.64, 149.74, 140.04, 139.90, 132.55, 129.25, 128.77, 122.46, 119.67, 119.61, 117.12, 115.58, 113.66, 72.79, 61.92, 26.78, 21.50. **HRMS** (ESI-TOF)  $m/z$  Calcd for  $C_{19}H_{19}N_3O_3$   $[M+H]^+$  372.1705, found 372.1707.

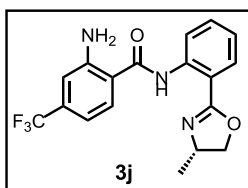

**(S)-2-amino-N-(2-(4-methyl-4,5-dihydrooxazol-2-yl)phenyl)-4-(trifluoromethyl)benzamide (3j):** white solid.  $M_p$  = 146.5-147.9 °C.  $^1H$  NMR (400 MHz, Chloroform-*d*)  $\delta$  13.08 (s, 1H), 8.86 (dd,  $J$  = 8.5, 1.2 Hz, 1H), 7.95 (d,  $J$  = 8.2 Hz, 1H), 7.90 (dd,  $J$  = 7.9, 1.7 Hz, 1H), 7.52 (ddd,  $J$  = 8.7, 7.3, 1.7 Hz, 1H), 7.13 (td,  $J$  = 7.6, 1.2 Hz, 1H), 6.96 – 6.89 (m, 2H), 5.98 (s, br, 2H), 4.57 – 4.48 (m, 2H), 4.00 – 3.90 (m, 1H), 1.42 (d,  $J$  = 6.3 Hz, 3H).  $^{13}C$  NMR (126 MHz,  $CDCl_3$ )  $\delta$  167.54, 163.72, 149.74, 140.02, 134.01 (q,  $J$  = 32.9 Hz), 132.60, 129.30, 129.14, 123.69 (q,  $J$  = 272.5 Hz), 122.54, 119.70, 118.67, 113.97 (q,  $J$  = 3.8 Hz), 113.69, 112.35 (q,  $J$  = 3.8 Hz), 72.83, 61.94, 21.51.  $^{19}F$  NMR (471 MHz,  $CDCl_3$ )  $\delta$  -63.61 (s). **HRMS** (ESI-TOF)  $m/z$  Calcd for  $C_{18}H_{16}F_3N_3O_2$   $[M+H]^+$  364.1261, found 364.1267.

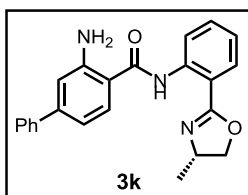

**(S)-3-amino-N-(2-(4-methyl-4,5-dihydrooxazol-2-yl)phenyl)-[1,1'-biphenyl]-4-carboxamide (3k):** white solid. Mp = 134.5-135.6 °C.  $^1\text{H NMR}$  (400 MHz,  $\text{CDCl}_3$ )  $\delta$  13.00 (s, 1H), 8.91 (d,  $J = 8.5$  Hz, 1H), 7.96 (d,  $J = 8.3$  Hz, 1H), 7.92 – 7.87 (m, 1H), 7.62 (d,  $J = 7.2$  Hz, 2H), 7.52 (s, 1H), 7.45 (t,  $J = 7.5$  Hz, 2H), 7.39 (d,  $J = 7.2$  Hz, 1H), 7.10 (s, 1H), 7.00 – 6.90 (m, 2H), 5.95 (s, br, 2H), 4.57 – 4.47 (m, 2H), 3.97 – 3.88 (m, 1H), 1.44 (d,  $J = 5.6$  Hz, 3H).  $^{13}\text{C NMR}$  (126 MHz,  $\text{CDCl}_3$ )  $\delta$  168.41, 163.58, 150.23, 145.23, 140.40, 140.28, 132.47, 129.19, 128.99, 128.69, 127.86, 127.04, 122.02, 119.62, 115.64, 115.46, 115.02, 113.50, 72.72, 61.95, 21.47. **HRMS** (ESI-TOF)  $m/z$  Calcd for  $\text{C}_{23}\text{H}_{21}\text{N}_3\text{O}_2$   $[\text{M}+\text{H}]^+$  372.1705, found 372.1707.

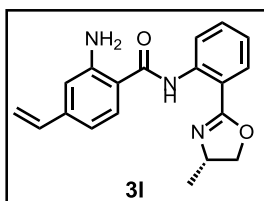

**(S)-2-amino-N-(2-(4-methyl-4,5-dihydrooxazol-2-yl)phenyl)-4-vinylbenzamide (3l):** white sticky foam.  $^1\text{H NMR}$  (400 MHz,  $\text{CDCl}_3$ )  $\delta$  12.94 (s, 1H), 8.87 (dd,  $J = 8.5, 1.1$  Hz, 1H), 7.88 (dd,  $J = 7.9, 1.7$  Hz, 1H), 7.84 (d,  $J = 8.3$  Hz, 1H), 7.50 (ddd,  $J = 8.8, 7.3, 1.7$  Hz, 1H), 7.09 (td,  $J = 7.6, 1.2$  Hz, 1H), 6.81 (dd,  $J = 8.3, 1.7$  Hz, 1H), 6.71 (d,  $J = 1.6$  Hz, 1H), 6.64 (dd,  $J = 17.6, 10.8$  Hz, 1H), 5.86 (s, br, 2H), 5.81 (dd,  $J = 17.6, 0.9$  Hz, 1H), 5.33 (dd,  $J = 10.8, 0.8$  Hz, 1H), 4.58 – 4.46 (m, 2H), 3.97 – 3.88 (m, 1H), 1.43 (d,  $J = 6.0$  Hz, 3H).  $^{13}\text{C NMR}$  (126 MHz,  $\text{CDCl}_3$ )  $\delta$  168.31, 163.56, 150.13, 141.44, 140.38, 136.23, 132.46, 129.18, 128.74, 122.00, 119.62, 115.67, 115.41, 115.22, 114.14, 113.49, 72.72, 61.95, 21.48. **HRMS** (ESI-TOF)  $m/z$  Calcd for  $\text{C}_{19}\text{H}_{19}\text{N}_3\text{O}_2$   $[\text{M}+\text{H}]^+$  338.1498, found 338.1499.

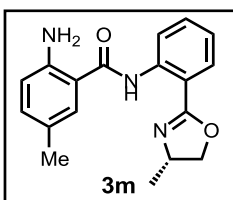

**(S)-2-amino-5-methyl-N-(2-(4-methyl-4,5-dihydrooxazol-2-yl)phenyl)benzamide**

**(3m)**: white sticky foam.  $^1\text{H NMR}$  (400 MHz,  $\text{CDCl}_3$ )  $\delta$  12.88 (s, 1H), 8.91 (dd,  $J = 8.5$ , 1.2 Hz, 1H), 7.89 (dd,  $J = 7.8$ , 1.7 Hz, 1H), 7.72 – 7.64 (m, 1H), 7.50 (ddd,  $J = 8.7$ , 7.2, 1.7 Hz, 1H), 7.12 – 7.06 (m, 2H), 6.64 (d,  $J = 8.3$  Hz, 1H), 5.66 (s, br, 2H), 4.58 – 4.45 (m, 2H), 3.99 – 3.85 (m, 1H), 2.31 (s, 3H), 1.44 (d,  $J = 6.3$  Hz, 3H).  $^{13}\text{C NMR}$  (126 MHz,  $\text{CDCl}_3$ )  $\delta$  168.64, 163.59, 147.65, 140.45, 133.45, 132.49, 129.21, 128.40, 125.32, 121.97, 119.59, 117.52, 116.14, 113.43, 72.68, 62.02, 21.47, 20.52. **HRMS** (ESI-TOF)  $m/z$  Calcd for  $\text{C}_{18}\text{H}_{19}\text{N}_3\text{O}_2$   $[\text{M}+\text{H}]^+$  310.1550, found 310.1550.

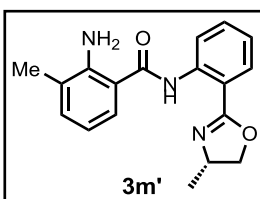

**(S)-2-amino-3-methyl-N-(2-(4-methyl-4,5-dihydrooxazol-2-yl)phenyl)benzamide**

**(3m')** white sticky foam.  $^1\text{H NMR}$  (400 MHz,  $\text{CDCl}_3$ )  $\delta$  12.92 (s, 1H), 8.88 (dd,  $J = 8.5$ , 1.2 Hz, 1H), 7.88 (dd,  $J = 7.9$ , 1.7 Hz, 1H), 7.77 (dd,  $J = 8.3$ , 1.4 Hz, 1H), 7.53 – 7.47 (m, 1H), 7.18 (d,  $J = 7.2$  Hz, 1H), 7.12 – 7.05 (m, 1H), 6.67 (t,  $J = 7.6$  Hz, 1H), 5.87 (s, br, 2H), 4.56 – 4.44 (m, 2H), 3.96 – 3.87 (m, 1H), 2.20 (s, 3H), 1.41 (d,  $J = 6.3$  Hz, 3H).  $^{13}\text{C NMR}$  (126 MHz,  $\text{CDCl}_3$ )  $\delta$  168.64, 163.59, 147.65, 140.45, 133.45, 132.49, 129.21, 128.40, 125.32, 121.97, 119.59, 117.52, 116.14, 113.43, 72.68, 62.02, 21.47, 20.52. **HRMS** (ESI-TOF)  $m/z$  Calcd for  $\text{C}_{18}\text{H}_{19}\text{N}_3\text{O}_2$   $[\text{M}+\text{H}]^+$  310.1550, found 310.1550.

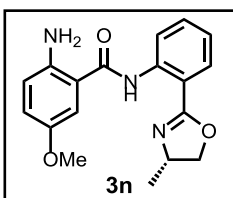

**(S)-2-amino-5-methoxy-N-(2-(4-methyl-4,5-dihydrooxazol-2-yl)phenyl)benzamide**

**(3n)**: white sticky foam.  $^1\text{H NMR}$  (400 MHz,  $\text{CDCl}_3$ )  $\delta$  12.85 (s, 1H), 8.87 (dd,  $J = 8.5$ ,



1.2 Hz, 1H), 7.89 (dd,  $J = 7.9, 1.7$  Hz, 1H), 7.50 (ddd,  $J = 8.8, 7.4, 1.7$  Hz, 1H), 7.42 (d,  $J = 2.8$  Hz, 1H), 7.10 (td,  $J = 7.6, 1.2$  Hz, 1H), 6.93 (dd,  $J = 8.8, 2.8$  Hz, 1H), 6.68 (d,  $J = 8.9$  Hz, 1H), 5.46 (s, br, 2H), 4.56 – 4.42 (m, 2H), 3.99 – 3.85 (m, 1H), 3.81 (s, 3H), 1.39 (d,  $J = 6.3$  Hz, 3H).  $^{13}\text{C}$  NMR (100 MHz,  $\text{CDCl}_3$ )  $\delta$  168.21, 163.56, 150.93, 144.07, 140.26, 132.44, 129.20, 122.10, 120.22, 119.66, 118.63, 116.70, 113.52, 112.81, 72.67, 62.01, 56.08, 21.48. HRMS (ESI-TOF)  $m/z$  Calcd for  $\text{C}_{18}\text{H}_{19}\text{N}_3\text{O}_3$   $[\text{M}+\text{H}]^+$  326.1498, found 326.1499.

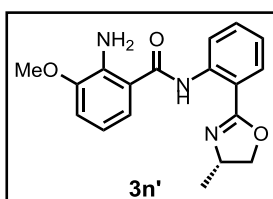

**(S)-2-amino-3-methoxy-N-(2-(4-methyl-4,5-dihydrooxazol-2-yl)phenyl)benzamide**

**(3n')**: white sticky foam.  $^1\text{H}$  NMR (400 MHz,  $\text{CDCl}_3$ )  $\delta$  12.90 (s, 1H), 8.89 (dd,  $J = 8.5, 1.2$  Hz, 1H), 7.87 (dd,  $J = 7.9, 1.7$  Hz, 1H), 7.54 – 7.46 (m, 2H), 7.09 (td,  $J = 7.6, 1.2$  Hz, 1H), 6.85 (dd,  $J = 7.8, 1.2$  Hz, 1H), 6.66 (t,  $J = 8.0$  Hz, 1H), 6.12 (s, br, 2H), 4.57 – 4.44 (m, 2H), 3.96 – 3.88 (m, 1H), 3.89 (s, 3H), 1.41 (d,  $J = 5.8$  Hz, 3H).  $^{13}\text{C}$  NMR (100 MHz,  $\text{CDCl}_3$ )  $\delta$  168.68, 163.52, 147.61, 141.00, 140.43, 132.46, 129.17, 121.97, 120.05, 119.68, 115.40, 114.67, 113.53, 111.77, 72.73, 61.99, 55.72, 21.46. HRMS (ESI-TOF)  $m/z$  Calcd for  $\text{C}_{18}\text{H}_{19}\text{N}_3\text{O}_3$   $[\text{M}+\text{H}]^+$  326.1498, found 326.1499.

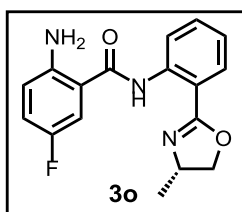

**(S)-2-amino-5-fluoro-N-(2-(4-methyl-4,5-dihydrooxazol-2-yl)phenyl)benzamide (3o):**

white solid. Mp=149.7-150.8 °C.  $^1\text{H}$  NMR (400 MHz,  $\text{CDCl}_3$ )  $\delta$  12.99 (s, 1H), 8.86 (dd,  $J = 8.5, 1.1$  Hz, 1H), 7.88 (dd,  $J = 7.9, 1.7$  Hz, 1H), 7.66 (dd,  $J = 8.2, 1.3$  Hz, 1H), 7.51 (ddd,  $J = 8.9, 7.3, 1.8$  Hz, 1H), 7.13 – 7.06 (m, 2H), 6.63 (td,  $J = 8.0, 5.2$  Hz, 1H), 5.90 (s, br, 2H), 4.58 – 4.46 (m, 2H), 3.97 – 3.88 (m, 1H), 1.41 (d,  $J = 6.5$  Hz, 3H).  $^{13}\text{C}$  NMR (126 MHz,  $\text{CDCl}_3$ )  $\delta$  167.77 (d,  $J = 2.7$  Hz), 163.62, 152.00 (d,  $J = 239.8$  Hz), 140.14, 139.09 (d,  $J = 13.8$  Hz), 132.54, 129.23, 123.51 (d,  $J = 3.6$  Hz), 122.30, 119.68, 118.02

(d,  $J = 4.5$  Hz), 117.13 (d,  $J = 19.0$  Hz), 114.73 (d,  $J = 7.4$  Hz), 113.61, 72.76, 61.94, 21.44.  $^{19}\text{F}$  NMR (471 MHz,  $\text{CDCl}_3$ )  $\delta$  -128.31 (s). HRMS (ESI-TOF)  $m/z$  Calcd for  $\text{C}_{17}\text{H}_{16}\text{FN}_3\text{O}_2$   $[\text{M}+\text{H}]^+$  314.1295, found 314.1299.

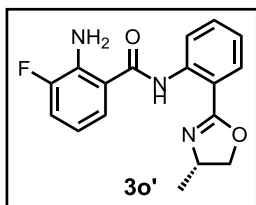

**(S)-2-amino-3-fluoro-N-(2-(4-methyl-4,5-dihydrooxazol-2-yl)phenyl)benzamide**

**(3o')**: white solid. Mp = 154.6–155.9 °C.  $^1\text{H}$  NMR (400 MHz,  $\text{CDCl}_3$ )  $\delta$  13.00 (s, 1H), 8.86 (dd,  $J = 8.5, 1.1$  Hz, 1H), 7.89 (dd,  $J = 8.0, 1.7$  Hz, 1H), 7.66 (dd,  $J = 10.2, 2.9$  Hz, 1H), 7.50 (ddd,  $J = 8.7, 7.3, 1.7$  Hz, 1H), 7.11 (ddd,  $J = 7.9, 7.3, 1.2$  Hz, 1H), 7.01 (ddd,  $J = 8.9, 7.7, 2.9$  Hz, 1H), 6.66 (dd,  $J = 9.0, 4.7$  Hz, 1H), 5.68 (s, br, 2H), 4.56 – 4.50 (m, 2H), 3.97 – 3.91 (m, 1H), 1.47 (d,  $J = 1.8$  Hz, 3H).  $^{13}\text{C}$  NMR (126 MHz,  $\text{CDCl}_3$ )  $\delta$  167.53, 163.68, 154.33 (d,  $J = 234.5$  Hz), 146.32, 140.16, 132.58, 129.24, 122.32, 120.03 (d,  $J = 23.0$  Hz), 119.53, 118.43 (d,  $J = 7.3$  Hz), 116.11 (d,  $J = 5.5$  Hz), 114.07 (d,  $J = 23.8$  Hz), 113.57, 72.86, 62.01, 21.27.  $^{19}\text{F}$  NMR (471 MHz,  $\text{CDCl}_3$ )  $\delta$  -135.58 (s). HRMS (ESI-TOF)  $m/z$  Calcd for  $\text{C}_{17}\text{H}_{16}\text{FN}_3\text{O}_2$   $[\text{M}+\text{H}]^+$  314.1295, found 314.1299.

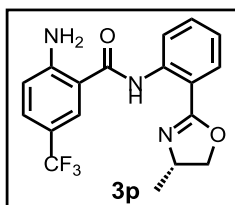

**(S)-2-amino-N-(2-(4-methyl-4,5-dihydrooxazol-2-yl)phenyl)-5-(trifluoromethyl)benzamide (3p)**: white solid. Mp = 166.3–167.8 °C.  $^1\text{H}$  NMR (400 MHz,  $\text{CDCl}_3$ )  $\delta$  13.15 (s, 1H), 8.86 (dd,  $J = 8.5, 1.1$  Hz, 1H), 8.22 – 8.17 (m, 1H), 7.91 (dd,  $J = 7.9, 1.7$  Hz, 1H), 7.51 (t,  $J = 1.4$  Hz, 1H), 7.45 (dd,  $J = 8.6, 2.0$  Hz, 1H), 7.13 (dd,  $J = 7.5, 1.2$  Hz, 1H), 6.73 (d,  $J = 8.6$  Hz, 1H), 6.24 (s, br, 2H), 4.59 – 4.45 (m, 2H), 3.99 – 3.91 (m, 1H), 1.39 (d,  $J = 6.3$  Hz, 3H).  $^{13}\text{C}$  NMR (126 MHz,  $\text{CDCl}_3$ )  $\delta$  167.49, 163.63, 152.34, 140.05, 132.52, 129.31, 128.97 (q,  $J = 3.4$  Hz), 126.23 (q,  $J = 4.0$  Hz), 124.63 (q,  $J = 270.7$  Hz), 122.43, 119.57, 117.96 (q,  $J = 33.1$  Hz), 117.12, 114.96, 113.67, 72.86, 61.98, 21.17.  $^{19}\text{F}$

**NMR** (471 MHz, CDCl<sub>3</sub>)  $\delta$  -61.10 (s). **HRMS** (ESI-TOF)  $m/z$  Calcd for C<sub>18</sub>H<sub>16</sub>F<sub>3</sub>N<sub>3</sub>O<sub>2</sub> [M+H]<sup>+</sup> 364.1266, found 364.1267.

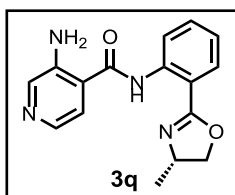

**(S)-3-amino-N-(2-(4-methyl-4,5-dihydrooxazol-2-yl)phenyl)nicotinamide (3q)**: white solid. Mp=151.2-152.9 °C. **<sup>1</sup>H NMR** (400 MHz, CDCl<sub>3</sub>)  $\delta$  13.19 (s, 1H), 8.85 (d, J = 8.4 Hz, 1H), 8.21 (s, 1H), 7.99 (d, J = 5.3 Hz, 1H), 7.90 (d, J = 7.9 Hz, 1H), 7.65 (d, J = 5.3 Hz, 1H), 7.52 (t, J = 8.0 Hz, 1H), 7.15 (t, J = 7.6 Hz, 1H), 5.79 (s, br, 2H), 4.58 – 4.49 (m, 2H), 3.99 – 3.90 (m, 1H), 1.43 (d, J = 5.6 Hz, 3H). **<sup>13</sup>C NMR**(126 MHz, CDCl<sub>3</sub>)  $\delta$  166.82, 163.69, 144.46, 141.14, 139.70, 137.24, 132.61, 129.30, 122.77, 120.79, 120.49, 119.71, 113.74, 72.85, 61.91, 21.45. **HRMS** (ESI-TOF)  $m/z$  Calcd for C<sub>16</sub>H<sub>17</sub>N<sub>4</sub>O<sub>2</sub> [M+H]<sup>+</sup> 297.1341, found 297.1346.

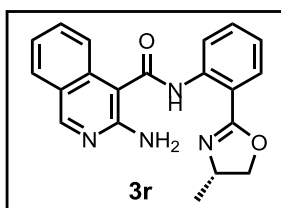

**(S)-4-amino-N-(2-(4-methyl-4,5-dihydrooxazol-2-yl)phenyl)quinoline-3-carboxamide (3r)**: white solid. Mp=181.6-182.9 °C. **<sup>1</sup>H NMR** (400 MHz, CDCl<sub>3</sub>)  $\delta$  13.20 (s, 1H), 9.02 (d, J = 8.0 Hz, 1H), 8.56 (s, 1H), 8.07 – 8.03 (m, 1H), 8.01 – 7.97 (m, 1H), 7.88 (dd, J = 7.9, 1.6 Hz, 1H), 7.57 (ddd, J = 8.7, 7.4, 1.7 Hz, 1H), 7.47 – 7.39 (m, 2H), 7.17 (td, J = 7.6, 1.2 Hz, 1H), 4.99 (s, br, 2H), 4.36 (dd, J = 9.3, 8.1 Hz, 1H), 4.11 – 3.97 (m, 1H), 3.78 (t, J = 8.1 Hz, 1H), 0.84 (d, J = 6.6 Hz, 3H). **<sup>13</sup>C NMR** (126 MHz, CDCl<sub>3</sub>)  $\delta$  165.90, 162.88, 144.31, 142.50, 139.54, 138.71, 132.59, 129.57, 129.21, 127.50, 125.18, 124.90, 124.03, 123.07, 119.93, 118.21, 113.76, 72.73, 61.61, 20.85. **HRMS** (ESI-TOF)  $m/z$  Calcd for C<sub>20</sub>H<sub>18</sub>N<sub>4</sub>O<sub>2</sub> [M+H]<sup>+</sup> 347.1498, found 347.1503.

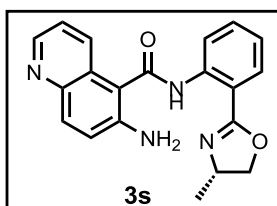

**(S)-5-amino-N-(2-(4-methyl-4,5-dihydrooxazol-2-yl)phenyl)quinoline-6-carboxamide (3s):** white solid. Mp=181.9-182.9 °C.  $^1\text{H NMR}$  (400 MHz,  $\text{CDCl}_3$ )  $\delta$  13.01 (s, 1H), 9.03 (dd,  $J = 8.4, 1.3$  Hz, 1H), 8.63 (dd,  $J = 4.2, 1.6$  Hz, 1H), 8.43 (ddd,  $J = 8.7, 1.6, 0.9$  Hz, 1H), 7.95 (dd,  $J = 9.0, 0.8$  Hz, 1H), 7.87 (dd,  $J = 7.9, 1.7$  Hz, 1H), 7.56 (ddd,  $J = 8.8, 7.4, 1.7$  Hz, 1H), 7.28 (q,  $J = 2.2$  Hz, 1H), 7.18 – 7.14 (m, 2H), 5.21 (s, br, 2H), 4.35 (dd,  $J = 9.4, 8.2$  Hz, 1H), 4.09 – 3.98 (m, 1H), 3.77 (t,  $J = 8.1$  Hz, 1H), 0.85 (d,  $J = 6.6$  Hz, 3H).  $^{13}\text{C NMR}$  (126 MHz,  $\text{CDCl}_3$ )  $\delta$  167.06, 162.96, 146.19, 145.27, 143.19, 139.86, 133.08, 132.58, 132.38, 129.21, 126.89, 122.74, 122.42, 121.48, 119.81, 113.59, 111.79, 72.67, 61.61, 20.92. **HRMS** (ESI-TOF)  $m/z$  Calcd for  $\text{C}_{20}\text{H}_{18}\text{N}_4\text{O}_2$   $[\text{M}+\text{H}]^+$  352.1113, found 352.1114.

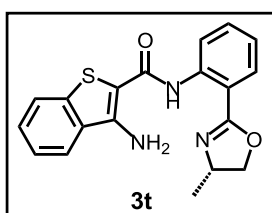

**(S)-3-amino-N-(2-(4-methyl-4,5-dihydrooxazol-2-yl)phenyl)benzo[b]thiophene-2-carboxamide (3t):** white solid. Mp=179.6-181.0 °C.  $^1\text{H NMR}$ (400 MHz,  $\text{CDCl}_3$ )  $\delta$  12.65 (s, 1H), 8.86 (d,  $J = 8.5$  Hz, 1H), 7.87 (dd,  $J = 7.9, 1.6$  Hz, 1H), 7.76 (d,  $J = 8.0$  Hz, 1H), 7.65 (d,  $J = 8.0$  Hz, 1H), 7.52 – 7.43 (m, 2H), 7.37 (t,  $J = 7.6$  Hz, 1H), 7.08 (t,  $J = 7.6$  Hz, 1H), 6.26 (s, br, 2H), 4.67 – 4.55 (m, 1H), 4.54 – 4.47 (m, 1H), 3.94 (t,  $J = 7.8$  Hz, 1H), 1.51 (d,  $J = 6.7$  Hz, 3H).  $^{13}\text{C NMR}$  (126 MHz,  $\text{CDCl}_3$ )  $\delta$  164.84, 163.34, 148.00, 140.44, 138.42, 132.25, 132.22, 129.03, 127.79, 123.93, 123.13, 121.83, 121.02, 119.73, 113.25, 102.60, 72.78, 62.01, 21.61. **HRMS** (ESI-TOF)  $m/z$  Calcd for  $\text{C}_{19}\text{H}_{17}\text{N}_3\text{O}_2\text{S}$   $[\text{M}+\text{H}]^+$  352.1113, found 352.1114.

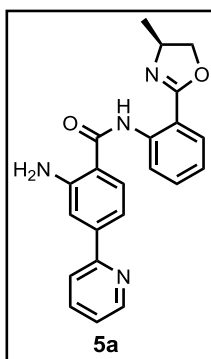

**(S)-2-amino-N-(2-(4-methyl-4,5-dihydrooxazol-2-yl)phenyl)-4-(pyridin-2-yl)benzamide (5a)**: white solid. Mp = 160.0–161.8 °C.  $^1\text{H NMR}$  (400 MHz,  $\text{CDCl}_3$ )  $\delta$  13.04 (s, 1H), 8.91 (dd,  $J = 8.5, 1.1$  Hz, 1H), 8.72 (dt,  $J = 4.9, 1.4$  Hz, 1H), 8.00 (d,  $J = 8.4$  Hz, 1H), 7.90 (dd,  $J = 7.9, 1.7$  Hz, 1H), 7.79 – 7.75 (m, 2H), 7.53 (ddd,  $J = 8.8, 7.3, 1.7$  Hz, 1H), 7.39 (d,  $J = 1.8$  Hz, 1H), 7.36 – 7.33 (m, 1H), 7.28 (td,  $J = 5.4, 2.7$  Hz, 1H), 7.12 (td,  $J = 7.6, 1.2$  Hz, 1H), 5.99 (s, br, 2H), 4.58 – 4.49 (m, 2H), 3.98 – 3.91 (m, 1H), 1.45 (d,  $J = 6.3$  Hz, 3H).  $^{13}\text{C NMR}$  (126 MHz,  $\text{CDCl}_3$ )  $\delta$  168.31, 163.57, 156.45, 150.26, 149.60, 142.94, 140.34, 136.74, 132.47, 129.19, 129.00, 122.64, 122.09, 120.85, 119.66, 116.37, 115.60, 114.84, 113.55, 72.74, 61.95, 21.53. **HRMS** (ESI-TOF)  $m/z$  Calcd for  $\text{C}_{22}\text{H}_{20}\text{N}_4\text{O}_2$   $[\text{M}+\text{H}]^+$  373.1653, found 373.1659.

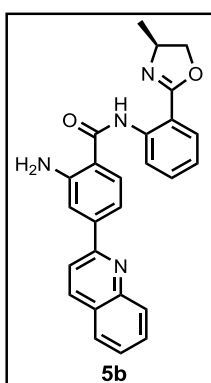

**(S)-2-amino-N-(2-(4-methyl-4,5-dihydrooxazol-2-yl)phenyl)-4-(quinolin-2-yl)benzamide (5b)**: white solid. Mp = 167.4–169.0 °C.  $^1\text{H NMR}$  (400 MHz,  $\text{CDCl}_3$ )  $\delta$  13.05 (s, 1H), 8.91 (dd,  $J = 8.5, 1.1$  Hz, 1H), 8.24 (d,  $J = 8.3$  Hz, 1H), 8.19 (dd,  $J = 8.4, 1.0$  Hz, 1H), 8.04 (d,  $J = 8.4$  Hz, 1H), 7.92 – 7.87 (m, 2H), 7.84 (dd,  $J = 8.1, 1.4$  Hz, 1H), 7.75 (ddd,  $J = 8.4, 6.9, 1.5$  Hz, 1H), 7.58 – 7.51 (m, 3H), 7.51 – 7.47 (m, 1H), 7.11 (td,  $J = 7.6, 1.2$  Hz, 1H), 6.02 (s, br, 2H), 4.57 – 4.47 (m, 2H), 3.99 – 3.90 (m, 1H), 1.46 (d,  $J =$

6.2 Hz, 3H).  $^{13}\text{C}$  NMR (126 MHz,  $\text{CDCl}_3$ )  $\delta$  168.36, 163.62, 156.46, 150.31, 148.20, 143.26, 140.37, 136.77, 132.51, 129.76, 129.23, 129.09, 127.46, 127.43, 126.54, 122.14, 119.73, 119.06, 116.71, 116.30, 115.51, 113.61, 72.78, 62.00, 21.59. HRMS (ESI-TOF)  $m/z$  Calcd for  $\text{C}_{26}\text{H}_{22}\text{N}_4\text{O}_2$   $[\text{M}+\text{H}]^+$  423.1811, found 423.1816.

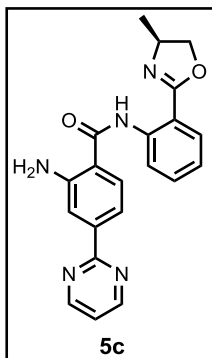

**(S)-2-amino-N-(2-(4-methyl-4,5-dihydrooxazol-2-yl)phenyl)-4-(pyrimidin-2-yl)benzamide (5c)**: white solid. Mp=195.6-196.4 °C.  $^1\text{H}$  NMR (400 MHz,  $\text{CDCl}_3$ )  $\delta$  13.07 (s, 1H), 8.90 (dd,  $J$  = 8.5, 1.1 Hz, 1H), 8.84 (d,  $J$  = 4.8 Hz, 2H), 8.02 (d,  $J$  = 8.4 Hz, 1H), 7.89 (dd,  $J$  = 7.8, 1.7 Hz, 1H), 7.84 (d,  $J$  = 1.7 Hz, 1H), 7.78 (dd,  $J$  = 8.4, 1.7 Hz, 1H), 7.52 (ddd,  $J$  = 8.7, 7.3, 1.7 Hz, 1H), 7.24 (t,  $J$  = 4.8 Hz, 1H), 7.11 (ddd,  $J$  = 8.3, 7.5, 1.2 Hz, 1H), 5.96 (s, br, 2H), 4.62 – 4.44 (m, 2H), 3.99 – 3.89 (m, 1H), 1.44 (d,  $J$  = 6.3 Hz, 3H).  $^{13}\text{C}$  NMR (126 MHz,  $\text{CDCl}_3$ )  $\delta$  168.28, 164.01, 163.59, 157.20, 150.11, 140.94, 140.32, 132.51, 129.21, 128.89, 122.18, 119.71, 119.49, 117.87, 117.03, 115.89, 113.61, 72.79, 61.99, 21.58. HRMS(ESI-TOF)  $m/z$  Calcd for  $\text{C}_{21}\text{H}_{19}\text{N}_5\text{O}_2$   $[\text{M}+\text{H}]^+$  374.1607, found 374.1612.

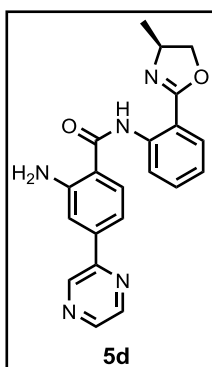

**(S)-2-amino-N-(2-(4-methyl-4,5-dihydrooxazol-2-yl)phenyl)-4-(pyrazin-2-yl)benzamide (5d)**: white solid. Mp=166.3-167.8 °C.  $^1\text{H}$  NMR (400 MHz,  $\text{CDCl}_3$ )  $\delta$  13.05 (s,

1H), 8.91 (dd,  $J = 8.5, 1.1$  Hz, 1H), 8.26 – 8.22 (m, 1H), 8.19 (dq,  $J = 8.4, 0.9$  Hz, 1H), 8.04 (d,  $J = 8.4$  Hz, 1H), 7.91 – 7.87 (m, 1H), 7.84 (dd,  $J = 8.1, 1.4$  Hz, 1H), 7.75 (ddd,  $J = 8.4, 6.9, 1.5$  Hz, 1H), 7.59 – 7.51 (m, 1H), 7.51 – 7.47 (m, 1H), 7.11 (td,  $J = 7.6, 1.2$  Hz, 1H), 6.02 (s, br, 2H), 4.58 – 4.45 (m, 2H), 3.99 – 3.91 (m, 1H), 1.46 (d,  $J = 6.2$  Hz, 3H).  **$^{13}\text{C}$  NMR** (126 MHz,  $\text{CDCl}_3$ )  $\delta$  168.06, 163.63, 151.89, 150.33, 144.12, 143.41, 142.40, 140.23, 139.82, 132.52, 129.29, 129.23, 122.24, 119.67, 117.14, 115.53, 114.52, 113.59, 72.77, 61.95, 21.55. **HRMS** (ESI-TOF)  $m/z$  Calcd for  $\text{C}_{21}\text{H}_{19}\text{N}_5\text{O}_2$   $[\text{M}+\text{H}]^+$  374.1606, found 374.1612.

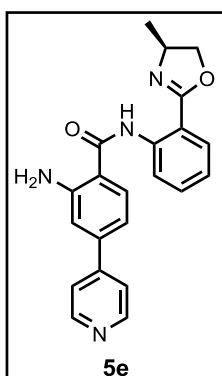

**(S)-2-amino-N-(2-(4-methyl-4,5-dihydrooxazol-2-yl)phenyl)-4-(pyridin-4-yl)benzamide (5e)**: white solid.  $\text{Mp} = 187.2\text{-}188.6$  °C.  **$^1\text{H}$  NMR** (400 MHz,  $\text{CDCl}_3$ )  $\delta$  13.03 (s, 1H), 8.88 (dd,  $J = 8.5, 1.1$  Hz, 1H), 8.66 (s, 2H), 7.97 (d,  $J = 8.2$  Hz, 1H), 7.89 (dd,  $J = 7.9, 1.7$  Hz, 1H), 7.55 – 7.46 (m, 3H), 7.11 (td,  $J = 7.6, 1.2$  Hz, 1H), 6.96 (d,  $J = 7.9$  Hz, 2H), 5.99 (s, br, 2H), 4.58 – 4.45 (m, 2H), 3.98 – 3.89 (m, 1H), 1.43 (d,  $J = 6.1$  Hz, 3H).  **$^{13}\text{C}$  NMR** (126 MHz,  $\text{CDCl}_3$ )  $\delta$  168.06, 163.67, 150.30, 150.14, 147.64, 142.01, 140.22, 132.54, 129.33, 129.25, 122.26, 121.61, 119.65, 116.47, 115.55, 114.90, 113.57, 72.76, 61.95, 21.51. **HRMS** (ESI-TOF)  $m/z$  Calcd for  $\text{C}_{22}\text{H}_{20}\text{N}_4\text{O}_2$   $[\text{M}+\text{H}]^+$  373.1652, found 373.1659.

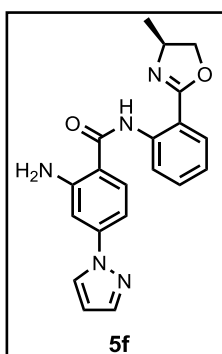

**(S)-2-amino-N-(2-(4-methyl-4,5-dihydrooxazol-2-yl)phenyl)-4-(1H-pyrazol-1-yl)benzamide (5f)**: white solid. Mp = 169.1-170.3 °C.  $^1\text{H NMR}$  (400 MHz,  $\text{CDCl}_3$ )  $\delta$  12.98 (s, 1H), 8.86 (dd,  $J = 8.5, 1.1$  Hz, 1H), 7.99 – 7.95 (m, 2H), 7.89 (dd,  $J = 7.9, 1.7$  Hz, 1H), 7.74 (dd,  $J = 1.8, 0.6$  Hz, 1H), 7.51 (ddd,  $J = 8.7, 7.3, 1.7$  Hz, 1H), 7.13 – 7.06 (m, 2H), 7.04 (dd,  $J = 8.6, 2.2$  Hz, 1H), 6.48 (dd,  $J = 2.5, 1.8$  Hz, 1H), 6.06 (s, br, 2H), 4.57 – 4.48 (m, 2H), 3.97 – 3.88 (m, 1H), 1.43 (d,  $J = 6.5$  Hz, 3H).  $^{13}\text{C NMR}$  (126 MHz,  $\text{CDCl}_3$ )  $\delta$  167.89, 163.65, 151.15, 142.93, 141.39, 140.29, 132.50, 130.08, 129.21, 126.77, 122.11, 119.60, 114.00, 113.50, 107.90, 106.68, 106.39, 72.74, 61.93, 21.52. **HRMS** (ESI-TOF)  $m/z$  Calcd for  $\text{C}_{20}\text{H}_{19}\text{N}_5\text{O}_2$   $[\text{M}+\text{H}]^+$  362.1605, found 362.1612.

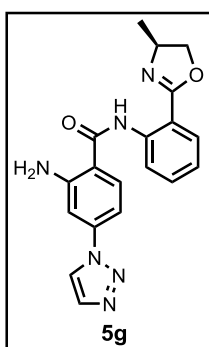

**(S)-2-amino-N-(2-(4-methyl-4,5-dihydrooxazol-2-yl)phenyl)-4-(1H-1,2,3-triazol-1-yl)benzamide (5g)**: white solid. Mp = 172.6-173.8 °C.  $^1\text{H NMR}$  (400 MHz,  $\text{CDCl}_3$ )  $\delta$  13.03 (s, 1H), 8.86 (dd,  $J = 8.5, 1.1$  Hz, 1H), 8.00 (dd,  $J = 8.4, 0.7$  Hz, 1H), 7.88 (dd,  $J = 7.9, 1.7$  Hz, 1H), 7.83 (s, 2H), 7.51 (ddd,  $J = 8.7, 7.3, 1.7$  Hz, 1H), 7.44 (d,  $J = 8.4$  Hz, 2H), 7.10 (td,  $J = 7.6, 1.2$  Hz, 1H), 6.09 (s, br, 2H), 4.57 – 4.45 (m, 2H), 3.98 – 3.89 (m, 1H), 1.43 (d,  $J = 6.4$  Hz, 3H).  $^{13}\text{C NMR}$  (126 MHz,  $\text{CDCl}_3$ )  $\delta$  167.84, 163.66, 150.93, 142.40, 140.24, 135.80, 132.52, 129.98, 129.22, 122.19, 119.61, 115.03, 113.54, 106.73, 106.54, 72.77, 61.94, 21.51. **HRMS** (ESI-TOF)  $m/z$  Calcd for  $\text{C}_{19}\text{H}_{18}\text{N}_6\text{O}_2$   $[\text{M}+\text{H}]^+$  363.1558, found 363.1564.

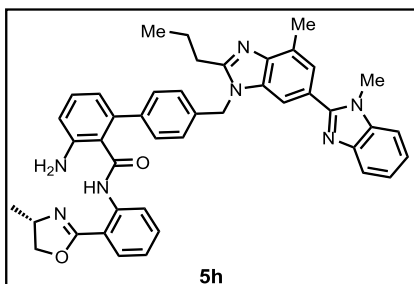



**(S)-3-amino-4'-((1,7'-dimethyl-2'-propyl-1H,3'H-[2,5'-bibenzo[d]imidazol]-3'-yl)methyl)-N-(2-(4-methyl-4,5-dihydrooxazol-2-yl)phenyl)-[1,1'-biphenyl]-2-carboxamide (5h):** white sticky foam.  $^1\text{H NMR}$  (400 MHz,  $\text{CDCl}_3$ )  $\delta$  11.95 (s, 1H), 8.73 (d,  $J = 8.4$  Hz, 1H), 7.87 – 7.81 (m, 1H), 7.50 (dd,  $J = 7.8, 1.6$  Hz, 1H), 7.47 – 7.44 (m, 2H), 7.42 – 7.36 (m, 4H), 7.36 – 7.32 (m, 2H), 7.22 (t,  $J = 7.8$  Hz, 1H), 6.92 (d,  $J = 8.0$  Hz, 2H), 6.87 (td,  $J = 7.6, 1.2$  Hz, 1H), 6.73 (dt,  $J = 7.5, 1.6$  Hz, 2H), 5.31 (d,  $J = 3.3$  Hz, 2H), 4.61 (s, br, 2H), 4.13 – 4.02 (m, 2H), 3.82 (s, 3H), 3.64 – 3.55 (m, 1H), 2.78 (s, 3H), 2.74 – 2.68 (m, 2H), 1.72 (h,  $J = 7.4$  Hz, 2H), 1.07 (d,  $J = 6.2$  Hz, 3H), 0.93 (t,  $J = 7.3$  Hz, 3H).;  $^{13}\text{C NMR}$  (126 MHz,  $\text{CDCl}_3$ )  $\delta$  168.43, 162.18, 156.53, 154.36, 146.15, 143.07, 142.12, 140.77, 139.85, 139.46, 136.45, 135.09, 134.58, 132.09, 130.46, 129.44, 129.31, 128.79, 125.63, 123.76, 123.37, 122.73, 122.59, 122.29, 121.41, 119.60, 119.35, 119.32, 115.54, 113.28, 109.55, 108.75, 72.27, 61.64, 46.82, 31.88, 29.63, 21.62, 21.22, 16.89, 13.93.; **HRMS** (ESI-TOF)  $m/z$  Calcd for  $\text{C}_{43}\text{H}_{41}\text{N}_7\text{O}_2$   $[\text{M}+\text{H}]^+$  688.3395, found 688.3401.

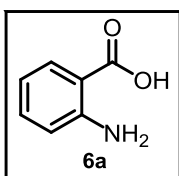

**2-aminobenzoic acid (6a):** light yellow solid. $^{15}$   $^1\text{H NMR}$  (400 MHz,  $\text{CDCl}_3$ )  $\delta$  7.94 (dd,  $J = 8.3, 1.7$  Hz, 1H), 7.32 (ddd,  $J = 8.5, 7.1, 1.6$  Hz, 1H), 6.74 – 6.62 (m, 2H).  $^{13}\text{C NMR}$  (101 MHz,  $\text{CDCl}_3$ )  $\delta$  173.71, 151.08, 135.12, 132.11, 116.77, 116.44, 109.48. **HRMS** (ESI-TOF)  $m/z$  Calcd for  $\text{C}_7\text{H}_7\text{NO}_2$   $[\text{M}-\text{H}]^-$  136.0404, found 136.0401

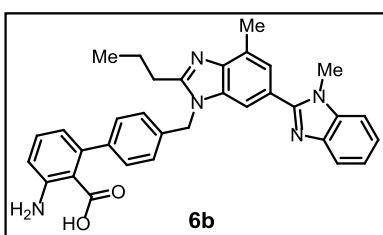

**3-amino-4'-((1,7'-dimethyl-2'-propyl-1H,3'H-[2,5'-bibenzo[d]imidazol]-3'-yl)methyl)-[1,1'-biphenyl]-2-carboxylic acid (6b):** white sticky foam.  $^1\text{H NMR}$  (400 MHz,  $\text{CDCl}_3$ )  $\delta$  8.33 – 8.21 (m, 1H), 7.35 – 7.28 (m, 5H), 7.19 (t,  $J = 7.8$  Hz, 1H), 7.14 – 7.08 (m, 2H), 7.04 (s, 1H), 6.93 (s, 1H), 6.70 (d,  $J = 8.2$  Hz, 1H), 6.66 (d,  $J = 7.3$  Hz, 1H), 5.37 (s, 2H), 3.71 (s, 3H), 3.10 (t,  $J = 7.8$  Hz, 2H), 2.69 (s, 3H), 2.03 – 1.90 (m, 2H),

1.14 (t,  $J = 7.3, 1.9$  Hz, 3H).  $^{13}\text{C}$  NMR (126 MHz,  $\text{CDCl}_3$ )  $\delta$  171.67, 156.62, 153.96, 149.01, 144.20, 143.84, 143.27, 141.07, 135.65, 134.52, 133.15, 130.88, 129.09, 128.85, 126.91, 123.64, 123.14, 123.09, 121.92, 119.65, 118.18, 115.78, 115.73, 111.53, 109.48, 48.84, 31.86, 29.98, 22.43, 17.04, 14.16. HRMS (ESI-TOF)  $m/z$  Calcd for  $\text{C}_{33}\text{H}_{31}\text{N}_5\text{O}_2$   $[\text{M}+\text{H}]^+$  530.2551, found 530.2556.

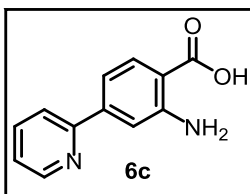

**2-amino-4-(pyridin-2-yl)benzoic acid (6c):** white sticky foam.  $^1\text{H}$  NMR (400 MHz,  $(\text{CD}_3)_2\text{CO}$ )  $\delta$  8.71 (dt,  $J = 4.8, 1.6$  Hz, 1H), 7.98 (d,  $J = 8.4$  Hz, 1H), 7.96 – 7.88 (m, 2H), 7.65 (d,  $J = 1.8$  Hz, 1H), 7.39 (ddd,  $J = 6.7, 4.7, 1.7$  Hz, 1H), 7.34 (dd,  $J = 8.4, 1.7$  Hz, 1H), 6.64 (s, 2H).  $^{13}\text{C}$  NMR (126 MHz,  $(\text{CD}_3)_2\text{CO}$ )  $\delta$  170.70, 157.69, 153.71, 151.25, 145.94, 138.50, 133.53, 124.55, 122.15, 116.25, 115.10, 111.60. HRMS (ESI-TOF)  $m/z$  Calcd for  $\text{C}_{12}\text{H}_{10}\text{N}_2\text{O}_2$   $[\text{M}+\text{H}]^+$  215.0815, found 215.0818.

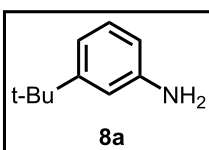

**3-(tert-butyl)aniline (8a)<sup>8</sup>:**  $^1\text{H}$  NMR (400 MHz,  $\text{CDCl}_3$ )  $\delta$  7.10 (t,  $J = 7.8$  Hz, 1H), 6.81 (ddd,  $J = 7.8, 1.9, 1.0$  Hz, 1H), 6.73 (t,  $J = 2.1$  Hz, 1H), 6.53 (ddd,  $J = 7.8, 2.3, 1.0$  Hz, 1H), 3.64 (s, br, 2H), 1.29 (s, 9H).

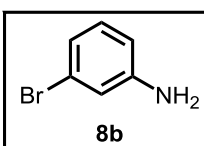

**3-bromoaniline (8b)<sup>9</sup>:**  $^1\text{H}$  NMR (400 MHz,  $\text{CDCl}_3$ )  $\delta$  7.00 (t,  $J = 7.9$  Hz, 1H), 6.86 (ddd,  $J = 7.9, 1.8, 1.0$  Hz, 1H), 6.84 (t,  $J = 2.1$  Hz, 1H), 6.59 (ddd,  $J = 7.9, 2.3, 1.0$  Hz, 1H), 3.71 (s, br, 2H).

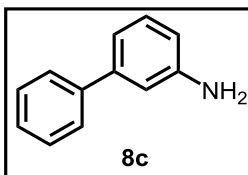

**[1,1'-biphenyl]-3-amine (8c)<sup>10</sup>:** <sup>1</sup>H NMR (400 MHz, CDCl<sub>3</sub>) δ 7.59 – 7.55 (m, 2H), 7.45 – 7.40 (m, 2H), 7.37 – 7.31 (m, 1H), 7.24 (t, *J* = 7.8 Hz, 1H), 7.05 – 7.00 (m, 1H), 6.94 (t, *J* = 2.0 Hz, 1H), 6.71 (ddd, *J* = 7.8, 2.3, 1.0 Hz, 1H), 3.76 (s, br, 2H).

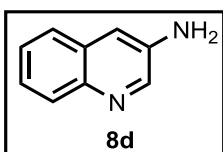

**quinolin-3-amine (8d)<sup>11</sup>:** <sup>1</sup>H NMR (400 MHz, CDCl<sub>3</sub>) δ 8.51 (d, *J* = 2.8 Hz, 1H), 8.00 – 7.93 (m, 1H), 7.63 – 7.55 (m, 1H), 7.51 – 7.38 (m, 2H), 7.24 (d, *J* = 2.8, 1H), 3.91 (s, br, 2H).

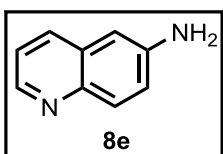

**quinolin-6-amine (8e)<sup>11</sup>:** <sup>1</sup>H NMR (400 MHz, CDCl<sub>3</sub>) δ 8.66 (dd, *J* = 4.2, 1.6 Hz, 1H), 7.91 (d, *J* = 8.9 Hz, 1H), 7.90 (dd, *J* = 8.0, 1.6 Hz, 1H), 7.27 (dd, *J* = 8.0, 4.2 Hz, 1H), 7.16 (dd, *J* = 8.9, 2.6 Hz, 1H), 6.90 (d, *J* = 2.6 Hz, 1H), 3.96 (s, br, 2H).

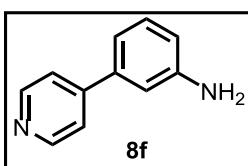

**3-(pyridin-4-yl)aniline (8f)<sup>12</sup>:** <sup>1</sup>H NMR (400 MHz, CDCl<sub>3</sub>) δ 8.66 – 8.60 (m, 2H), 7.50 – 7.44 (m, 2H), 7.29 (t, *J* = 7.8 Hz, 1H), 7.02 (ddd, *J* = 7.7, 1.7, 1.0 Hz, 1H), 6.93 (t, *J* = 2.0 Hz, 1H), 6.76 (ddd, *J* = 8.0, 2.4, 0.9 Hz, 1H), 3.81 (s, br, 2H).

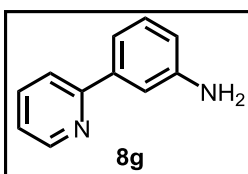

**3-(pyridin-2-yl)aniline (8g)<sup>13</sup>:** <sup>1</sup>H NMR (400 MHz, CDCl<sub>3</sub>) δ 8.67 (dt, *J* = 4.7, 1.3 Hz, 1H), 7.74 (td, *J* = 7.5, 7.1, 1.8 Hz, 1H), 7.70 (dt, *J* = 8.0, 1.3 Hz, 1H), 7.39 (t, *J* = 2.0 Hz, 1H), 7.32 (dt, *J* = 7.7, 1.4 Hz, 1H), 7.27 (t, *J* = 7.7 Hz, 1H), 7.22 (ddd, *J* = 6.6, 4.7, 1.5 Hz, 1H), 6.75 (ddd, *J* = 7.7, 2.4, 1.1 Hz, 1H), 3.75 (s, br, 2H).

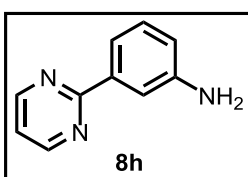

**3-(pyrimidin-2-yl)aniline (8h)<sup>14</sup>:** <sup>1</sup>H NMR (400 MHz, CDCl<sub>3</sub>) δ 8.79 (d, *J* = 4.8 Hz, 2H), 7.84 (ddd, *J* = 7.8, 1.6, 1.0 Hz, 1H), 7.79 – 7.76 (m, 1H), 7.29 (t, *J* = 7.8 Hz, 1H), 7.18 (t, *J* = 4.8 Hz, 1H), 6.82 (ddd, *J* = 7.8, 2.5, 1.0 Hz, 1H), 3.79 (s, br, 2H).

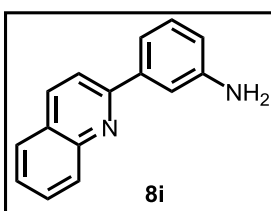

**2-(3-aminophenyl)quinoline (8i)<sup>15</sup>:** <sup>1</sup>H NMR (400 MHz, CDCl<sub>3</sub>) δ 8.21 (d, *J* = 8.6 Hz, 1H), 8.16 (dd, *J* = 8.4, 1.2 Hz, 1H), 7.85 (d, *J* = 8.6 Hz, 1H), 7.83 (dd, *J* = 8.1, 1.5 Hz, 1H), 7.72 (ddd, *J* = 8.4, 6.8, 1.5 Hz, 1H), 7.57 (t, *J* = 2.1 Hz, 1H), 7.52 (ddd, *J* = 8.1, 6.8, 1.2 Hz, 1H), 7.48 (ddd, *J* = 7.8, 1.7, 1.0 Hz, 1H), 7.31 (t, *J* = 7.8 Hz, 1H), 6.80 (ddd, *J* = 7.8, 2.4, 1.0 Hz, 1H), 3.83 (s, br, 2H).

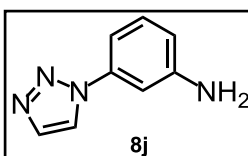

**3-(1H-1,2,3-triazol-1-yl)aniline (8j)<sup>16</sup>:** <sup>1</sup>H NMR (400 MHz, CDCl<sub>3</sub>) δ 7.78 (s, 2H),

7.46 (ddd,  $J = 8.0, 2.1, 0.9$  Hz, 1H), 7.42 (t,  $J = 2.2$  Hz, 1H), 7.25 (t,  $J = 8.0$  Hz, 1H), 6.66 (ddd,  $J = 8.0, 2.3, 0.9$  Hz, 1H), 3.83 (s, br, 2H).

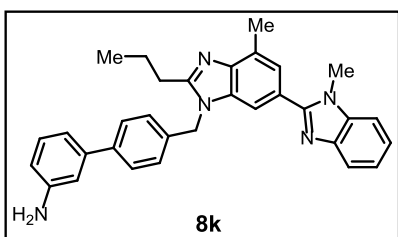

**4'-((1,7'-dimethyl-2'-propyl-1H,3'H-[2,5'-bibenzo[d]imidazol]-3'-yl)methyl)-[1,1'-biphenyl]-3-amine (8k):** white sticky foam.  $^1\text{H NMR}$  (400 MHz,  $\text{CDCl}_3$ )  $\delta$  7.84 – 7.78 (m, 1H), 7.51 (s, 1H), 7.47 (d,  $J = 8.1$  Hz, 2H), 7.43 (s, 1H), 7.37 – 7.33 (m, 1H), 7.32 – 7.27 (m, 2H), 7.19 (t,  $J = 7.8$  Hz, 1H), 7.10 (d,  $J = 7.9$  Hz, 2H), 6.90 (d,  $J = 7.7$  Hz, 1H), 6.82 (s, 1H), 6.65 (dd,  $J = 7.9, 2.2$  Hz, 1H), 5.43 (s, 2H), 3.77 (s, 3H), 2.96 – 2.89 (m, 2H), 2.77 (s, 3H), 1.87 (h,  $J = 7.5$  Hz, 2H), 1.05 (t,  $J = 7.4$  Hz, 3H).;  $^{13}\text{C NMR}$  (126 MHz,  $\text{CDCl}_3$ )  $\delta$  156.67, 154.28, 146.77, 143.20, 141.67, 141.46, 141.13, 136.26, 135.02, 134.62, 129.99, 129.73, 129.51, 127.62, 126.53, 123.77, 122.85, 122.75, 119.18, 117.40, 114.29, 113.62, 109.63, 109.34, 47.10, 31.85, 29.81, 21.83, 16.90, 14.07.; **HRMS** (ESI-TOF)  $m/z$  Calcd for  $\text{C}_{32}\text{H}_{31}\text{N}_5$   $[\text{M}-\text{H}]^-$  484.2507, found 484.2520.

### 3.3.1 X-ray Crystallographic Data of 3a-A.

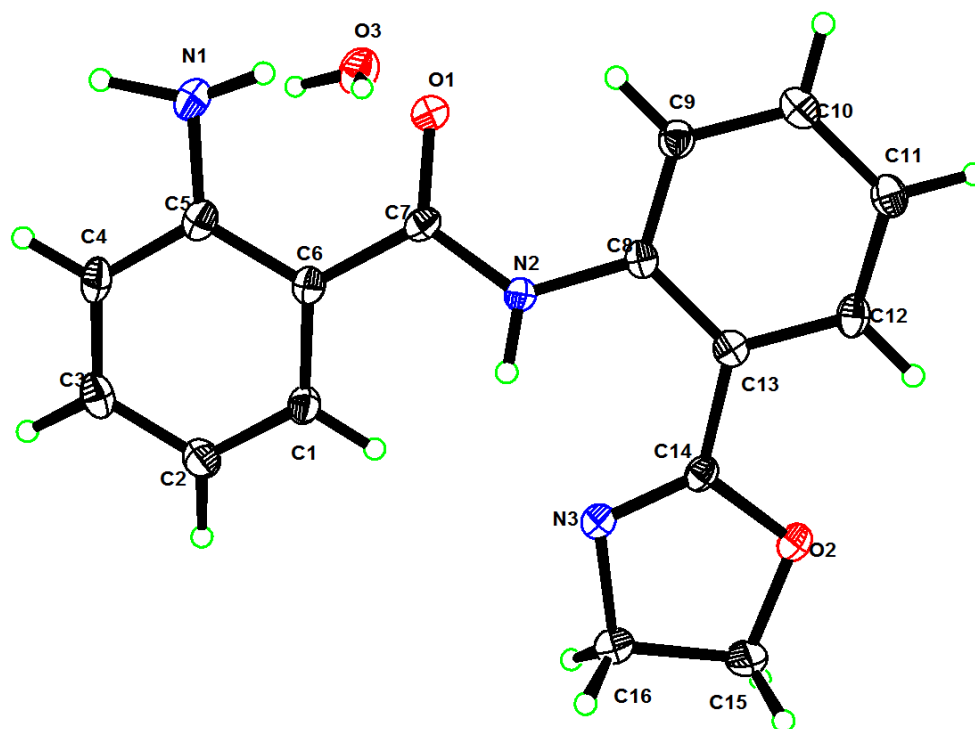

#### Crystal data

|                                                                                     |                                                         |
|-------------------------------------------------------------------------------------|---------------------------------------------------------|
| $2(\text{C}_{16}\text{H}_{15}\text{N}_3\text{O}_2) \cdot 0.5(\text{H}_4\text{O}_2)$ | $D_x = 1.428 \text{ Mg m}^{-3}$                         |
| $M_r = 580.63$                                                                      | Mo $K\alpha$ radiation, $\lambda = 0.71073 \text{ \AA}$ |
| Orthorhombic, $Fdd2$                                                                | Cell parameters from 1035 reflections                   |
| $a = 29.697 (4) \text{ \AA}$                                                        | $\theta = 2.7\text{--}27.5^\circ$                       |
| $b = 33.356 (5) \text{ \AA}$                                                        | $\mu = 0.10 \text{ mm}^{-1}$                            |
| $c = 5.4539 (8) \text{ \AA}$                                                        | $T = 170 \text{ K}$                                     |
| $V = 5402.4 (14) \text{ \AA}^3$                                                     | Block, colourless                                       |
| $Z = 8$                                                                             | $0.25 \times 0.18 \times 0.1 \text{ mm}$                |
| $F(000) = 2448$                                                                     |                                                         |

#### Data collection

|                                                                                                                                                                                                                                                                        |                                                                        |
|------------------------------------------------------------------------------------------------------------------------------------------------------------------------------------------------------------------------------------------------------------------------|------------------------------------------------------------------------|
| Bruker APEX-II CCD diffractometer                                                                                                                                                                                                                                      | 1855 reflections with $I > 2\sigma(I)$                                 |
| $\phi$ and $\omega$ scans                                                                                                                                                                                                                                              | $R_{\text{int}} = 0.058$                                               |
| Absorption correction: multi-scan SADABS2008/1 (Bruker,2008) was used for absorption correction. $wR2(\text{int})$ was 0.0590 before and 0.0429 after correction. The Ratio of minimum to maximum transmission is 0.8637. The $\lambda/2$ correction factor is 0.0015. | $\theta_{\text{max}} = 25.0^\circ$ ; $\theta_{\text{min}} = 1.8^\circ$ |
| $T_{\text{min}} = 0.644$ , $T_{\text{max}} = 0.746$                                                                                                                                                                                                                    | $h = -34 \rightarrow 29$                                               |
| 9526 measured reflections                                                                                                                                                                                                                                              | $k = -38 \rightarrow 39$                                               |
| 2262 independent reflections                                                                                                                                                                                                                                           | $l = -6 \rightarrow 6$                                                 |

### Refinement

|                                  |                                                                                                                                                       |
|----------------------------------|-------------------------------------------------------------------------------------------------------------------------------------------------------|
| Refinement on $F^2$              | Hydrogen site location: mixed                                                                                                                         |
| Least-squares matrix: full       | H atoms treated by a mixture of independent and constrained refinement                                                                                |
| $R[F^2 > 2\sigma(F^2)] = 0.040$  | $w = 1/[\sigma^2(F_o^2) + (0.049P)^2]$<br>where $P = (F_o^2 + 2F_c^2)/3$                                                                              |
| $wR(F^2) = 0.092$                | $(\Delta/\sigma)_{\text{max}} < 0.001$                                                                                                                |
| $S = 1.01$                       | $\Delta_{\text{max}} = 0.15 \text{ e } \text{\AA}^{-3}$                                                                                               |
| 2262 reflections                 | $\Delta_{\text{min}} = -0.17 \text{ e } \text{\AA}^{-3}$                                                                                              |
| 203 parameters                   | Absolute structure: Flack x determined using 633 quotients $[(I^+)-(I^-)]/[(I^+)+(I^-)]$ (Parsons, Flack and Wagner, Acta Cryst. B69 (2013) 249-259). |
| 6 restraints                     | Flack parameter: 0.3 (10)                                                                                                                             |
| Primary atom site location: dual |                                                                                                                                                       |

### Special details

**Geometry.** All esds (except the esd in the dihedral angle between two l.s. planes) are

estimated using the full covariance matrix. The cell esds are taken into account individually in the estimation of esds in distances, angles and torsion angles; correlations between esds in cell parameters are only used when they are defined by crystal symmetry. An approximate (isotropic) treatment of cell esds is used for estimating esds involving l.s. planes.

Fractional atomic coordinates and isotropic or equivalent isotropic displacement parameters ( $\text{\AA}^2$ )

|     | x            | y            | z           | $U_{\text{iso}}^*/U_{\text{eq}}$ | Occ. (<1) |
|-----|--------------|--------------|-------------|----------------------------------|-----------|
| O2  | 0.44217 (7)  | 0.63272 (7)  | -0.1272 (4) | 0.0332 (6)                       |           |
| O1  | 0.34560 (8)  | 0.74402 (7)  | 0.6582 (5)  | 0.0371 (6)                       |           |
| O3  | 0.2500       | 0.7500       | 0.5445 (8)  | 0.0447 (10)                      |           |
| H3A | 0.2756       | 0.7451       | 0.6074      | 0.067*                           | 0.5       |
| H3B | 0.2296       | 0.7388       | 0.6296      | 0.067*                           | 0.5       |
| N2  | 0.38244 (8)  | 0.69290 (8)  | 0.4684 (5)  | 0.0247 (6)                       |           |
| H2  | 0.3866       | 0.6668       | 0.4701      | 0.030*                           |           |
| N3  | 0.40825 (9)  | 0.62472 (8)  | 0.2391 (6)  | 0.0291 (7)                       |           |
| N1  | 0.30274 (10) | 0.72957 (9)  | 1.0752 (6)  | 0.0373 (8)                       |           |
| H1A | 0.3198       | 0.7439       | 0.9798      | 0.045*                           |           |
| C14 | 0.42527 (10) | 0.64867 (10) | 0.0823 (6)  | 0.0244 (8)                       |           |
| C13 | 0.42870 (10) | 0.69244 (9)  | 0.1028 (7)  | 0.0242 (7)                       |           |
| C7  | 0.35261 (9)  | 0.70742 (10) | 0.6358 (6)  | 0.0254 (8)                       |           |
| C8  | 0.40755 (9)  | 0.71427 (10) | 0.2929 (6)  | 0.0227 (7)                       |           |
| C5  | 0.30395 (10) | 0.69035 (10) | 0.9975 (7)  | 0.0279 (8)                       |           |
| C1  | 0.32594 (10) | 0.63667 (9)  | 0.7226 (7)  | 0.0295 (8)                       |           |
| H1  | 0.3418       | 0.6277       | 0.5817      | 0.035*                           |           |
| C6  | 0.32797 (10) | 0.67764 (9)  | 0.7859 (6)  | 0.0251 (8)                       |           |
| C12 | 0.45387 (9)  | 0.71305 (10) | -0.0731 (6) | 0.0283 (8)                       |           |
| H12 | 0.4683       | 0.6984       | -0.2004     | 0.034*                           |           |
| C9  | 0.41241 (10) | 0.75578 (10) | 0.3008 (6)  | 0.0282 (8)                       |           |
| H9  | 0.3987       | 0.7707       | 0.4293      | 0.034*                           |           |



|      |              |              |             |             |  |
|------|--------------|--------------|-------------|-------------|--|
| C3   | 0.27861 (11) | 0.62212 (11) | 1.0644 (7)  | 0.0343 (9)  |  |
| H3   | 0.2617       | 0.6035       | 1.1585      | 0.041*      |  |
| C10  | 0.43718 (10) | 0.77549 (11) | 0.1217 (8)  | 0.0317 (8)  |  |
| H10  | 0.4397       | 0.8039       | 0.1276      | 0.038*      |  |
| C4   | 0.28005 (10) | 0.66151 (10) | 1.1324 (7)  | 0.0328 (9)  |  |
| H4   | 0.2644       | 0.6697       | 1.2757      | 0.039*      |  |
| C11  | 0.45824 (10) | 0.75458 (10) | -0.0654 (6) | 0.0297 (8)  |  |
| H11  | 0.4754       | 0.7683       | -0.1862     | 0.036*      |  |
| C16  | 0.41328 (12) | 0.58381 (10) | 0.1411 (7)  | 0.0362 (9)  |  |
| H16A | 0.3835       | 0.5709       | 0.1187      | 0.043*      |  |
| H16B | 0.4318       | 0.5671       | 0.2522      | 0.043*      |  |
| C2   | 0.30184 (11) | 0.60933 (11) | 0.8576 (7)  | 0.0342 (9)  |  |
| H2A  | 0.3011       | 0.5819       | 0.8101      | 0.041*      |  |
| C15  | 0.43683 (13) | 0.58975 (10) | -0.1047 (8) | 0.0407 (10) |  |
| H15A | 0.4665       | 0.5762       | -0.1062     | 0.049*      |  |
| H15B | 0.4183       | 0.5790       | -0.2405     | 0.049*      |  |
| H1B  | 0.2849 (14)  | 0.7286 (8)   | 1.239 (6)   | 0.103 (19)* |  |

Atomic displacement parameters ( $\text{\AA}^2$ )

|     | $U^{11}$    | $U^{22}$    | $U^{33}$    | $U^{12}$     | $U^{13}$     | $U^{23}$     |
|-----|-------------|-------------|-------------|--------------|--------------|--------------|
| O2  | 0.0413 (13) | 0.0325 (14) | 0.0258 (14) | 0.0014 (10)  | 0.0084 (11)  | -0.0044 (11) |
| O1  | 0.0478 (15) | 0.0269 (13) | 0.0366 (17) | 0.0032 (11)  | 0.0129 (12)  | -0.0011 (12) |
| O3  | 0.042 (2)   | 0.057 (3)   | 0.035 (3)   | 0.009 (2)    | 0.000        | 0.000        |
| N2  | 0.0293 (14) | 0.0236 (14) | 0.0212 (17) | 0.0009 (11)  | 0.0026 (12)  | 0.0004 (12)  |
| N3  | 0.0329 (15) | 0.0267 (15) | 0.0278 (18) | 0.0008 (12)  | 0.0056 (13)  | -0.0019 (13) |
| N1  | 0.0410 (18) | 0.0392 (18) | 0.032 (2)   | 0.0050 (13)  | 0.0115 (14)  | -0.0034 (15) |
| C14 | 0.0234 (15) | 0.0295 (19) | 0.020 (2)   | 0.0037 (14)  | -0.0006 (15) | -0.0019 (15) |
| C13 | 0.0197 (15) | 0.0276 (18) | 0.025 (2)   | -0.0005 (13) | -0.0046 (14) | 0.0012 (16)  |

|     |             |             |             |              |              |              |
|-----|-------------|-------------|-------------|--------------|--------------|--------------|
| C7  | 0.0264 (16) | 0.0271 (19) | 0.023 (2)   | 0.0036 (13)  | -0.0015 (14) | -0.0047 (16) |
| C8  | 0.0195 (15) | 0.0288 (18) | 0.0199 (19) | -0.0011 (14) | -0.0039 (14) | 0.0035 (14)  |
| C5  | 0.0246 (17) | 0.038 (2)   | 0.022 (2)   | 0.0060 (14)  | -0.0031 (15) | 0.0002 (15)  |
| C1  | 0.0326 (18) | 0.033 (2)   | 0.023 (2)   | 0.0014 (15)  | 0.0034 (15)  | 0.0007 (17)  |
| C6  | 0.0221 (16) | 0.031 (2)   | 0.022 (2)   | 0.0003 (14)  | -0.0011 (13) | 0.0009 (15)  |
| C12 | 0.0234 (16) | 0.039 (2)   | 0.022 (2)   | -0.0018 (15) | -0.0001 (15) | 0.0016 (16)  |
| C9  | 0.0294 (18) | 0.0305 (19) | 0.025 (2)   | -0.0013 (14) | -0.0001 (15) | -0.0010 (16) |
| C3  | 0.0308 (18) | 0.043 (2)   | 0.029 (2)   | -0.0024 (16) | -0.0015 (17) | 0.0120 (18)  |
| C10 | 0.0327 (18) | 0.0303 (19) | 0.032 (2)   | -0.0053 (15) | -0.0041 (16) | 0.0047 (17)  |
| C4  | 0.0293 (17) | 0.049 (2)   | 0.020 (2)   | 0.0058 (16)  | 0.0030 (14)  | 0.0055 (17)  |
| C11 | 0.0280 (17) | 0.035 (2)   | 0.026 (2)   | -0.0041 (15) | -0.0025 (15) | 0.0047 (17)  |
| C16 | 0.043 (2)   | 0.029 (2)   | 0.037 (3)   | 0.0022 (15)  | 0.0064 (18)  | -0.0031 (17) |
| C2  | 0.0376 (19) | 0.032 (2)   | 0.033 (2)   | -0.0031 (15) | 0.0003 (18)  | 0.0035 (17)  |
| C15 | 0.056 (2)   | 0.027 (2)   | 0.039 (3)   | 0.0011 (16)  | 0.0091 (18)  | -0.0053 (18) |

Geometric parameters (Å, °)

|        |           |         |           |
|--------|-----------|---------|-----------|
| O2—C14 | 1.357 (4) | C1—H1   | 0.9500    |
| O2—C15 | 1.447 (4) | C1—C6   | 1.411 (4) |
| O1—C7  | 1.244 (3) | C1—C2   | 1.374 (5) |
| O3—H3A | 0.8500    | C12—H12 | 0.9500    |
| O3—H3B | 0.8492    | C12—C11 | 1.392 (4) |
| N2—H2  | 0.8800    | C9—H9   | 0.9500    |
| N2—C7  | 1.361 (4) | C9—C10  | 1.388 (5) |
| N2—C8  | 1.407 (4) | C3—H3   | 0.9500    |
| N3—C14 | 1.275 (4) | C3—C4   | 1.366 (5) |
| N3—C16 | 1.473 (4) | C3—C2   | 1.389 (5) |
| N1—H1A | 0.8708    | C10—H10 | 0.9500    |
| N1—C5  | 1.375 (4) | C10—C11 | 1.385 (5) |

|             |            |             |           |
|-------------|------------|-------------|-----------|
| N1—H1B      | 1.04 (2)   | C4—H4       | 0.9500    |
| C14—C13     | 1.468 (4)  | C11—H11     | 0.9500    |
| C13—C8      | 1.414 (5)  | C16—H16A    | 0.9900    |
| C13—C12     | 1.397 (5)  | C16—H16B    | 0.9900    |
| C7—C6       | 1.481 (5)  | C16—C15     | 1.525 (5) |
| C8—C9       | 1.393 (4)  | C2—H2A      | 0.9500    |
| C5—C6       | 1.422 (5)  | C15—H15A    | 0.9900    |
| C5—C4       | 1.404 (5)  | C15—H15B    | 0.9900    |
|             |            |             |           |
| C14—O2—C15  | 106.0 (3)  | C11—C12—H12 | 119.4     |
| H3A—O3—H3B  | 109.4      | C8—C9—H9    | 119.9     |
| C7—N2—H2    | 115.8      | C10—C9—C8   | 120.2 (3) |
| C7—N2—C8    | 128.4 (3)  | C10—C9—H9   | 119.9     |
| C8—N2—H2    | 115.8      | C4—C3—H3    | 120.0     |
| C14—N3—C16  | 107.3 (3)  | C4—C3—C2    | 120.0 (3) |
| H1A—N1—H1B  | 145.9      | C2—C3—H3    | 120.0     |
| C5—N1—H1A   | 108.9      | C9—C10—H10  | 119.4     |
| C5—N1—H1B   | 104.3 (15) | C11—C10—C9  | 121.3 (3) |
| O2—C14—C13  | 115.4 (3)  | C11—C10—H10 | 119.4     |
| N3—C14—O2   | 117.8 (3)  | C5—C4—H4    | 118.9     |
| N3—C14—C13  | 126.9 (3)  | C3—C4—C5    | 122.2 (4) |
| C8—C13—C14  | 122.5 (3)  | C3—C4—H4    | 118.9     |
| C12—C13—C14 | 118.3 (3)  | C12—C11—H11 | 120.6     |
| C12—C13—C8  | 119.2 (3)  | C10—C11—C12 | 118.8 (3) |
| O1—C7—N2    | 121.6 (3)  | C10—C11—H11 | 120.6     |
| O1—C7—C6    | 121.4 (3)  | N3—C16—H16A | 110.9     |
| N2—C7—C6    | 117.0 (3)  | N3—C16—H16B | 110.9     |
| N2—C8—C13   | 118.2 (3)  | N3—C16—C15  | 104.2 (3) |

|                |            |                |            |
|----------------|------------|----------------|------------|
| C9—C8—N2       | 122.5 (3)  | H16A—C16—H16B  | 108.9      |
| C9—C8—C13      | 119.2 (3)  | C15—C16—H16A   | 110.9      |
| N1—C5—C6       | 123.2 (3)  | C15—C16—H16B   | 110.9      |
| N1—C5—C4       | 118.5 (3)  | C1—C2—C3       | 119.3 (3)  |
| C4—C5—C6       | 118.3 (3)  | C1—C2—H2A      | 120.3      |
| C6—C1—H1       | 118.9      | C3—C2—H2A      | 120.3      |
| C2—C1—H1       | 118.9      | O2—C15—C16     | 104.7 (3)  |
| C2—C1—C6       | 122.3 (3)  | O2—C15—H15A    | 110.8      |
| C5—C6—C7       | 119.8 (3)  | O2—C15—H15B    | 110.8      |
| C1—C6—C7       | 122.4 (3)  | C16—C15—H15A   | 110.8      |
| C1—C6—C5       | 117.8 (3)  | C16—C15—H15B   | 110.8      |
| C13—C12—H12    | 119.4      | H15A—C15—H15B  | 108.9      |
| C11—C12—C13    | 121.3 (3)  |                |            |
|                |            |                |            |
| O2—C14—C13—C8  | 171.4 (3)  | C7—N2—C8—C9    | 14.3 (5)   |
| O2—C14—C13—C12 | -8.5 (4)   | C8—N2—C7—O1    | -3.4 (5)   |
| O1—C7—C6—C5    | -15.1 (5)  | C8—N2—C7—C6    | 175.1 (3)  |
| O1—C7—C6—C1    | 162.7 (3)  | C8—C13—C12—C11 | -0.4 (4)   |
| N2—C7—C6—C5    | 166.4 (3)  | C8—C9—C10—C11  | -1.2 (5)   |
| N2—C7—C6—C1    | -15.8 (4)  | C6—C5—C4—C3    | -1.1 (5)   |
| N2—C8—C9—C10   | -179.3 (3) | C6—C1—C2—C3    | -0.2 (5)   |
| N3—C14—C13—C8  | -8.5 (5)   | C12—C13—C8—N2  | -179.9 (3) |
| N3—C14—C13—C12 | 171.5 (3)  | C12—C13—C8—C9  | -0.2 (4)   |
| N3—C16—C15—O2  | -1.2 (4)   | C9—C10—C11—C12 | 0.6 (5)    |
| N1—C5—C6—C7    | -1.0 (5)   | C4—C5—C6—C7    | 178.5 (3)  |
| N1—C5—C6—C1    | -178.9 (3) | C4—C5—C6—C1    | 0.6 (5)    |
| N1—C5—C4—C3    | 178.4 (3)  | C4—C3—C2—C1    | -0.3 (5)   |
| C14—O2—C15—C16 | 1.8 (3)    | C16—N3—C14—O2  | 1.3 (4)    |

|                     |            |                |            |
|---------------------|------------|----------------|------------|
| C14—N3—C16—C15      | 0.0 (4)    | C16—N3—C14—C13 | -178.8 (3) |
| C14—C13—C8—N2       | 0.2 (4)    | C2—C1—C6—C7    | -177.8 (3) |
| C14—C13—C8—C9       | 179.8 (3)  | C2—C1—C6—C5    | 0.0 (5)    |
| C14—C13—C12—C1<br>1 | 179.6 (3)  | C2—C3—C4—C5    | 1.0 (5)    |
| C13—C8—C9—C10       | 1.0 (4)    | C15—O2—C14—N3  | -2.1 (4)   |
| C13—C12—C11—C1<br>0 | 0.2 (5)    | C15—O2—C14—C13 | 178.0 (3)  |
| C7—N2—C8—C13        | -166.1 (3) |                |            |

### 3.3.2 X-ray Crystallographic Data of 5a.

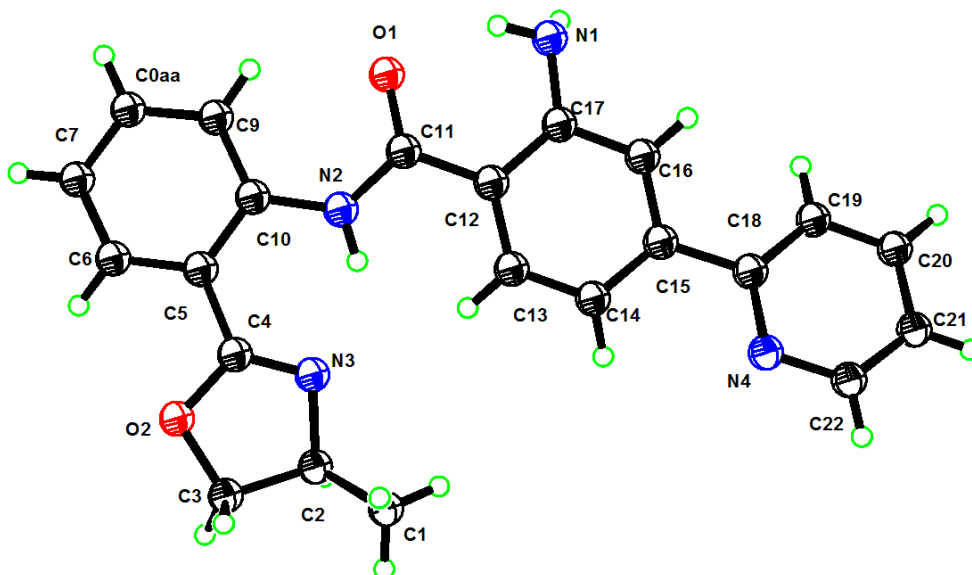

Table S12 Crystal data and structure refinement for mo\_2017795\_0m.

|                       |                                                               |
|-----------------------|---------------------------------------------------------------|
| Identification code   | mo_2017795_0m                                                 |
| Empirical formula     | C <sub>22</sub> H <sub>20</sub> N <sub>4</sub> O <sub>2</sub> |
| Formula weight        | 372.42                                                        |
| Temperature/K         | 296.15                                                        |
| Crystal system        | monoclinic                                                    |
| Space group           | P2 <sub>1</sub>                                               |
| a/Å                   | 12.646(2)                                                     |
| b/Å                   | 8.4619(16)                                                    |
| c/Å                   | 17.452(3)                                                     |
| $\alpha$ /°           | 90                                                            |
| $\beta$ /°            | 90.459(5)                                                     |
| $\gamma$ /°           | 90                                                            |
| Volume/Å <sup>3</sup> | 1867.5(6)                                                     |

|                                                |                                                               |
|------------------------------------------------|---------------------------------------------------------------|
| Z                                              | 4                                                             |
| $\rho_{\text{calc}}/\text{cm}^3$               | 1.325                                                         |
| $\mu/\text{mm}^{-1}$                           | 0.088                                                         |
| F(000)                                         | 784.0                                                         |
| Crystal size/ $\text{mm}^3$                    | $0.18 \times 0.11 \times 0.08$                                |
| Radiation                                      | MoK $\alpha$ ( $\lambda = 0.71073$ )                          |
| 2 $\Theta$ range for data collection/ $^\circ$ | 2.334 to 54.942                                               |
| Index ranges                                   | $-16 \leq h \leq 16, -10 \leq k \leq 10, -22 \leq l \leq 22$  |
| Reflections collected                          | 17022                                                         |
| Independent reflections                        | 8399 [ $R_{\text{int}} = 0.0601, R_{\text{sigma}} = 0.1120$ ] |
| Data/restraints/parameters                     | 8399/446/510                                                  |
| Goodness-of-fit on $F^2$                       | 0.966                                                         |
| Final R indexes [ $I \geq 2\sigma(I)$ ]        | $R_1 = 0.0607, wR_2 = 0.1164$                                 |
| Final R indexes [all data]                     | $R_1 = 0.1385, wR_2 = 0.1516$                                 |
| Largest diff. peak/hole / $e \text{ \AA}^{-3}$ | 0.20/-0.20                                                    |
| Flack parameter                                | -2(2)                                                         |

Table S13 Fractional Atomic Coordinates ( $\times 10^4$ ) and Equivalent Isotropic Displacement Parameters ( $\text{\AA}^2 \times 10^3$ ) for mo\_2017795\_0m.  $U_{\text{eq}}$  is defined as 1/3 of the trace of the orthogonalised  $U_{ij}$  tensor.

| Atom | x        | y       | z          | U(eq)    |
|------|----------|---------|------------|----------|
| O1   | 3592(3)  | 4514(4) | 127.0(18)  | 50.8(10) |
| O2   | 652(3)   | 1030(4) | 2553.5(19) | 52(1)    |
| O3   | 5503(3)  | 1330(5) | 2540(2)    | 57.5(10) |
| O4   | 8614(3)  | 4832(5) | 4888.9(19) | 55(1)    |
| N2   | 2839(3)  | 3427(5) | 1170(2)    | 41.6(10) |
| N6   | 7756(3)  | 3822(5) | 3855(2)    | 43.1(11) |
| N5   | 6982(3)  | 2809(5) | 2517(2)    | 46.5(11) |
| N3   | 2244(3)  | 2236(5) | 2525(2)    | 45.7(11) |
| C11  | 3585(4)  | 4344(6) | 832(3)     | 35.7(11) |
| N1   | 5271(4)  | 6343(6) | 245(2)     | 58.9(13) |
| C12  | 4383(4)  | 5090(5) | 1336(3)    | 33.5(11) |
| C35  | 10174(4) | 6305(6) | 3940(3)    | 41.9(12) |
| C14  | 5107(4)  | 5650(6) | 2607(3)    | 38.7(12) |
| C32  | 6890(4)  | 3068(6) | 4214(3)    | 44.2(13) |

|     |          |         |         |          |
|-----|----------|---------|---------|----------|
| C17 | 5180(4)  | 6050(6) | 1013(3) | 38.5(12) |
| C10 | 1977(4)  | 2634(6) | 832(3)  | 40.0(12) |
| C27 | 6158(4)  | 2242(6) | 3750(3) | 43.9(13) |
| N7  | 10234(4) | 6739(7) | 4704(2) | 68.2(15) |
| C37 | 10939(4) | 6509(6) | 2672(3) | 38.6(11) |
| C5  | 1284(4)  | 1805(6) | 1318(3) | 40.2(12) |
| C18 | 6683(4)  | 7437(6) | 2785(3) | 39.0(12) |
| N4  | 6400(4)  | 7697(6) | 3524(3) | 64.1(14) |
| C33 | 8558(4)  | 4630(6) | 4185(3) | 40.0(12) |
| C36 | 10919(4) | 6897(6) | 3438(3) | 45.4(13) |
| C4  | 1444(4)  | 1734(6) | 2148(3) | 40.7(12) |
| C13 | 4384(4)  | 4924(6) | 2135(3) | 37.7(12) |
| C16 | 5912(4)  | 6782(6) | 1508(3) | 39.8(12) |
| C8  | 12593(4) | 7950(6) | 2472(3) | 42.1(13) |
| C38 | 10185(4) | 5418(6) | 2395(3) | 42.7(13) |
| C26 | 6274(4)  | 2170(6) | 2916(3) | 44.5(13) |
| C39 | 9440(4)  | 4825(6) | 2880(3) | 40.7(12) |
| C34 | 9387(4)  | 5244(6) | 3665(3) | 39.3(12) |
| C15 | 5894(4)  | 6604(6) | 2295(3) | 37.5(11) |
| C24 | 6751(4)  | 2462(6) | 1698(3) | 47.6(13) |
| C2  | 2091(4)  | 1781(6) | 3337(3) | 47.7(13) |
| C40 | 11734(4) | 7236(6) | 2153(3) | 43.6(13) |
| C9  | 1784(4)  | 2638(7) | 50(3)   | 52.7(14) |
| C19 | 7633(4)  | 7935(7) | 2498(3) | 45.0(13) |
| N41 | 11535(4) | 7206(6) | 1378(3) | 74.1(16) |
| C25 | 5808(4)  | 1338(7) | 1745(3) | 53.5(14) |
| C3  | 926(4)   | 1267(7) | 3351(3) | 52.7(14) |
| C31 | 6752(4)  | 3100(8) | 5003(3) | 60.2(16) |
| C20 | 8314(5)  | 8737(7) | 2969(4) | 64.8(17) |
| C44 | 13290(4) | 8668(7) | 1997(4) | 70.6(18) |
| C7  | 255(4)   | 984(8)  | 219(3)  | 63.6(17) |
| C6  | 435(4)   | 983(7)  | 996(3)  | 53.3(15) |
| C22 | 7105(6)  | 8494(8) | 3973(4) | 75.0(19) |
| C23 | 7694(4)  | 1789(7) | 1296(3) | 64.6(17) |
| C21 | 8046(6)  | 9042(8) | 3715(4) | 75.0(19) |



|      |          |         |         |          |
|------|----------|---------|---------|----------|
| C0AA | 928(4)   | 1801(8) | -249(3) | 65.8(18) |
| C1   | 2363(5)  | 3118(7) | 3880(3) | 65.3(17) |
| C42  | 12272(7) | 7952(9) | 921(4)  | 83(2)    |
| C30  | 5902(5)  | 2317(8) | 5326(4) | 76(2)    |
| C28  | 5315(4)  | 1493(8) | 4098(3) | 61.7(16) |
| C43  | 13134(6) | 8706(8) | 1228(5) | 86(2)    |
| C29  | 5179(5)  | 1529(9) | 4880(4) | 78(2)    |

Table S14 Anisotropic Displacement Parameters ( $\text{\AA}^2 \times 10^3$ ) for mo\_2017795 \_0m. The Anisotropic displacement factor exponent takes the form:  $-2\pi^2[h^2a^2U_{11}+2hka*b* U_{12}+\dots]$ .

| Atom | U <sub>11</sub> | U <sub>22</sub> | U <sub>33</sub> | U <sub>23</sub> | U <sub>13</sub> | U <sub>12</sub> |
|------|-----------------|-----------------|-----------------|-----------------|-----------------|-----------------|
| O1   | 62(2)           | 59(2)           | 32.0(19)        | -2.1(18)        | 1.5(17)         | -8(2)           |
| O2   | 51(2)           | 57(2)           | 49(2)           | 10.8(19)        | 4.1(16)         | -6.4(19)        |
| O3   | 54(2)           | 55(2)           | 63(2)           | -4(2)           | -9.2(18)        | -10(2)          |
| O4   | 66(2)           | 64(3)           | 35(2)           | 1.7(19)         | -2.6(17)        | -8(2)           |
| N2   | 42(2)           | 49(3)           | 34(2)           | 4(2)            | -1.0(18)        | -1(2)           |
| N6   | 43(2)           | 52(3)           | 34(2)           | -4(2)           | -0.7(19)        | 0(2)            |
| N5   | 43(2)           | 53(3)           | 44(2)           | -9(2)           | -3.5(19)        | 1(2)            |
| N3   | 47(2)           | 51(3)           | 39(2)           | 3(2)            | 3.1(19)         | 0(2)            |
| C11  | 38(3)           | 35(3)           | 34(3)           | 4(2)            | 1(2)            | 9(2)            |
| N1   | 63(3)           | 79(4)           | 35(2)           | 1(2)            | 9(2)            | -13(3)          |
| C12  | 38(2)           | 32(3)           | 31(2)           | 4(2)            | 5.5(19)         | 7(2)            |
| C35  | 46(3)           | 44(3)           | 35(3)           | -7(2)           | -11(2)          | 5(2)            |
| C14  | 48(3)           | 37(3)           | 32(3)           | 7(2)            | 1(2)            | 2(2)            |
| C32  | 42(3)           | 46(3)           | 44(3)           | -3(2)           | 4(2)            | 6(2)            |
| C17  | 48(3)           | 36(3)           | 31(3)           | 0(2)            | 5(2)            | 3(2)            |
| C10  | 33(2)           | 48(3)           | 39(3)           | -1(2)           | 0(2)            | 3(2)            |
| C27  | 41(3)           | 42(3)           | 48(3)           | -5(2)           | 2(2)            | 5(2)            |
| N7   | 79(4)           | 87(4)           | 39(2)           | -11(3)          | 0(2)            | -29(3)          |
| C37  | 41(3)           | 35(3)           | 40(3)           | 0(2)            | -6(2)           | 10(2)           |
| C5   | 34(2)           | 45(3)           | 42(3)           | 4(2)            | -2(2)           | 8(2)            |
| C18  | 46(3)           | 34(3)           | 37(3)           | 2(2)            | -5(2)           | 8(2)            |

|      |        |       |        |        |        |        |
|------|--------|-------|--------|--------|--------|--------|
| N4   | 79(3)  | 65(3) | 48(3)  | 2(3)   | -7(2)  | 8(3)   |
| C33  | 47(3)  | 40(3) | 33(3)  | -3(2)  | -6(2)  | 8(2)   |
| C36  | 47(3)  | 46(3) | 42(3)  | -5(2)  | -4(2)  | -1(3)  |
| C4   | 40(3)  | 37(3) | 45(3)  | 5(2)   | 3(2)   | 4(2)   |
| C13  | 39(3)  | 36(3) | 38(3)  | 6(2)   | 6(2)   | 0(2)   |
| C16  | 44(3)  | 41(3) | 35(3)  | 4(2)   | 8(2)   | 0(2)   |
| C8   | 34(2)  | 39(3) | 53(3)  | -1(3)  | 0(2)   | 1(2)   |
| C38  | 47(3)  | 42(3) | 39(3)  | -6(2)  | 1(2)   | 0(3)   |
| C26  | 35(3)  | 41(3) | 57(3)  | -9(3)  | -5(2)  | 7(2)   |
| C39  | 45(3)  | 42(3) | 35(3)  | -3(2)  | -10(2) | -2(2)  |
| C34  | 44(3)  | 39(3) | 35(3)  | -4(2)  | -9(2)  | 4(2)   |
| C15  | 40(3)  | 38(3) | 35(2)  | 6(2)   | 1(2)   | 2(2)   |
| C24  | 58(3)  | 39(3) | 46(3)  | -1(2)  | -15(2) | 4(3)   |
| C2   | 60(3)  | 47(3) | 36(3)  | 7(2)   | -1(2)  | 7(3)   |
| C40  | 48(3)  | 34(3) | 48(3)  | -1(2)  | 2(2)   | 7(2)   |
| C9   | 53(3)  | 61(4) | 44(3)  | -4(3)  | -2(2)  | 2(3)   |
| C19  | 39(3)  | 44(3) | 52(3)  | 3(3)   | -3(2)  | 1(3)   |
| N41  | 102(4) | 67(4) | 53(3)  | 4(3)   | 5(3)   | 16(3)  |
| C25  | 59(3)  | 46(3) | 55(3)  | -6(3)  | -11(3) | 2(3)   |
| C3   | 60(3)  | 54(3) | 44(3)  | 7(3)   | 5(2)   | 3(3)   |
| C31  | 58(3)  | 72(4) | 51(3)  | -6(3)  | 11(3)  | 1(3)   |
| C20  | 46(3)  | 54(4) | 95(4)  | 14(4)  | -15(3) | -5(3)  |
| C44  | 43(3)  | 53(4) | 117(5) | 6(4)   | 14(3)  | 2(3)   |
| C7   | 49(3)  | 80(5) | 62(4)  | 5(3)   | -14(3) | -10(3) |
| C6   | 42(3)  | 65(4) | 53(3)  | 7(3)   | -5(2)  | -6(3)  |
| C22  | 97(5)  | 76(5) | 51(4)  | -4(3)  | -18(3) | 10(4)  |
| C23  | 71(4)  | 76(4) | 46(3)  | -7(3)  | 3(3)   | 3(3)   |
| C21  | 79(4)  | 57(4) | 88(5)  | -8(4)  | -43(4) | 12(4)  |
| C0AA | 57(3)  | 93(5) | 47(3)  | -4(3)  | -9(3)  | -11(3) |
| C1   | 89(4)  | 64(4) | 43(3)  | -1(3)  | -5(3)  | -3(4)  |
| C42  | 129(6) | 65(5) | 55(4)  | 12(3)  | 25(4)  | 21(4)  |
| C30  | 77(4)  | 95(5) | 58(4)  | -3(4)  | 24(3)  | -13(4) |
| C28  | 47(3)  | 67(4) | 72(4)  | -13(3) | 7(3)   | -6(3)  |
| C43  | 102(5) | 51(4) | 106(5) | 9(4)   | 61(4)  | 26(4)  |
| C29  | 68(4)  | 87(5) | 77(4)  | -7(4)  | 27(3)  | -18(4) |

Table S15 Bond Lengths for mo\_2017795\_0m.

| Atom | Atom | Length/Å | Atom | Atom | Length/Å  |
|------|------|----------|------|------|-----------|
| O1   | C11  | 1.239(5) | C37  | C38  | 1.410(7)  |
| O2   | C4   | 1.368(5) | C37  | C40  | 1.491(7)  |
| O2   | C3   | 1.445(6) | C5   | C4   | 1.463(7)  |
| O3   | C26  | 1.369(6) | C5   | C6   | 1.394(7)  |
| O3   | C25  | 1.443(6) | C18  | N4   | 1.360(6)  |
| O4   | C33  | 1.242(5) | C18  | C15  | 1.486(7)  |
| N2   | C11  | 1.360(6) | C18  | C19  | 1.371(7)  |
| N2   | C10  | 1.406(6) | N4   | C22  | 1.361(8)  |
| N6   | C32  | 1.418(6) | C33  | C34  | 1.486(7)  |
| N6   | C33  | 1.349(6) | C16  | C15  | 1.382(6)  |
| N5   | C26  | 1.260(6) | C8   | C40  | 1.358(7)  |
| N5   | C24  | 1.486(6) | C8   | C44  | 1.358(7)  |
| N3   | C4   | 1.275(6) | C38  | C39  | 1.367(7)  |
| N3   | C2   | 1.482(6) | C39  | C34  | 1.416(6)  |
| C11  | C12  | 1.475(7) | C24  | C25  | 1.528(7)  |
| N1   | C17  | 1.369(5) | C24  | C23  | 1.501(7)  |
| C12  | C17  | 1.415(6) | C2   | C3   | 1.537(7)  |
| C12  | C13  | 1.402(6) | C2   | C1   | 1.514(7)  |
| C35  | N7   | 1.383(6) | C40  | N41  | 1.374(7)  |
| C35  | C36  | 1.386(7) | C9   | C0AA | 1.392(7)  |
| C35  | C34  | 1.422(7) | C19  | C20  | 1.366(8)  |
| C14  | C13  | 1.371(6) | N41  | C42  | 1.384(8)  |
| C14  | C15  | 1.396(6) | C31  | C30  | 1.386(8)  |
| C32  | C27  | 1.410(7) | C20  | C21  | 1.372(9)  |
| C32  | C31  | 1.390(7) | C44  | C43  | 1.355(9)  |
| C17  | C16  | 1.405(7) | C7   | C6   | 1.373(7)  |
| C10  | C5   | 1.412(7) | C7   | C0AA | 1.371(8)  |
| C10  | C9   | 1.383(6) | C22  | C21  | 1.358(9)  |
| C27  | C26  | 1.466(7) | C42  | C43  | 1.369(10) |
| C27  | C28  | 1.386(7) | C30  | C29  | 1.370(9)  |
| C37  | C36  | 1.377(6) | C28  | C29  | 1.377(8)  |

Table S16 Bond Angles for mo\_2017795\_0m.

| Atom | Atom | Atom | Angle/°  | Atom | Atom | Atom | Angle/°  |
|------|------|------|----------|------|------|------|----------|
| C4   | O2   | C3   | 105.5(4) | N3   | C4   | O2   | 117.4(4) |
| C26  | O3   | C25  | 105.3(4) | N3   | C4   | C5   | 126.9(4) |
| C11  | N2   | C10  | 129.0(4) | C14  | C13  | C12  | 123.2(4) |
| C33  | N6   | C32  | 128.3(4) | C15  | C16  | C17  | 123.1(5) |
| C26  | N5   | C24  | 108.1(4) | C40  | C8   | C44  | 118.0(6) |
| C4   | N3   | C2   | 107.3(4) | C39  | C38  | C37  | 119.7(5) |
| O1   | C11  | N2   | 120.5(5) | O3   | C26  | C27  | 114.9(5) |
| O1   | C11  | C12  | 122.2(4) | N5   | C26  | O3   | 117.7(5) |
| N2   | C11  | C12  | 117.3(4) | N5   | C26  | C27  | 127.4(5) |
| C17  | C12  | C11  | 119.6(4) | C38  | C39  | C34  | 123.1(5) |
| C13  | C12  | C11  | 123.1(4) | C35  | C34  | C33  | 120.6(4) |
| C13  | C12  | C17  | 117.3(4) | C39  | C34  | C35  | 116.5(5) |
| N7   | C35  | C36  | 118.8(5) | C39  | C34  | C33  | 122.8(5) |
| N7   | C35  | C34  | 121.8(5) | C14  | C15  | C18  | 121.8(4) |
| C36  | C35  | C34  | 119.5(4) | C16  | C15  | C14  | 117.9(5) |
| C13  | C14  | C15  | 119.9(4) | C16  | C15  | C18  | 120.3(4) |
| C27  | C32  | N6   | 118.4(4) | N5   | C24  | C25  | 102.7(4) |
| C31  | C32  | N6   | 122.2(5) | N5   | C24  | C23  | 112.0(4) |
| C31  | C32  | C27  | 119.4(5) | C23  | C24  | C25  | 114.3(5) |
| N1   | C17  | C12  | 124.1(5) | N3   | C2   | C3   | 102.8(4) |
| N1   | C17  | C16  | 117.4(4) | N3   | C2   | C1   | 111.9(4) |
| C16  | C17  | C12  | 118.5(4) | C1   | C2   | C3   | 114.5(5) |
| N2   | C10  | C5   | 117.9(4) | C8   | C40  | C37  | 118.4(5) |
| C9   | C10  | N2   | 122.9(5) | C8   | C40  | N41  | 123.4(5) |
| C9   | C10  | C5   | 119.2(5) | N41  | C40  | C37  | 118.1(5) |
| C32  | C27  | C26  | 121.4(5) | C10  | C9   | C0AA | 120.0(5) |
| C28  | C27  | C32  | 118.6(5) | C20  | C19  | C18  | 118.9(5) |
| C28  | C27  | C26  | 120.0(5) | C40  | N41  | C42  | 116.1(6) |
| C36  | C37  | C38  | 118.1(5) | O3   | C25  | C24  | 105.6(4) |
| C36  | C37  | C40  | 120.6(5) | O2   | C3   | C2   | 104.2(4) |
| C38  | C37  | C40  | 121.3(4) | C30  | C31  | C32  | 119.9(6) |

|     |     |     |          |      |      |     |          |
|-----|-----|-----|----------|------|------|-----|----------|
| C10 | C5  | C4  | 122.3(4) | C19  | C20  | C21 | 120.3(6) |
| C6  | C5  | C10 | 119.0(5) | C43  | C44  | C8  | 121.7(7) |
| C6  | C5  | C4  | 118.6(5) | C0AA | C7   | C6  | 119.3(5) |
| N4  | C18 | C15 | 116.3(4) | C7   | C6   | C5  | 121.3(5) |
| N4  | C18 | C19 | 122.3(5) | C21  | C22  | N4  | 123.4(6) |
| C19 | C18 | C15 | 121.4(5) | C22  | C21  | C20 | 118.3(7) |
| C18 | N4  | C22 | 116.8(5) | C7   | C0AA | C9  | 121.2(5) |
| O4  | C33 | N6  | 121.9(5) | C43  | C42  | N41 | 121.6(7) |
| O4  | C33 | C34 | 121.4(5) | C29  | C30  | C31 | 121.2(6) |
| N6  | C33 | C34 | 116.6(4) | C29  | C28  | C27 | 121.8(6) |
| C37 | C36 | C35 | 123.1(5) | C44  | C43  | C42 | 119.1(7) |
| O2  | C4  | C5  | 115.7(4) | C30  | C29  | C28 | 119.1(6) |

Table S17 Hydrogen Atom Coordinates ( $\text{\AA} \times 10^4$ ) and Isotropic Displacement Parameters ( $\text{\AA}^2 \times 10^3$ ) for mo\_2017795\_0m.

| Atom | x     | y    | z    | U(eq) |
|------|-------|------|------|-------|
| H2   | 2904  | 3317 | 1658 | 50    |
| H6A  | 7772  | 3755 | 3363 | 52    |
| H1A  | 5789  | 5788 | 70   | 71    |
| H1B  | 4693  | 6065 | 15   | 71    |
| H14  | 5074  | 5507 | 3135 | 46    |
| H7A  | 10397 | 7724 | 4733 | 82    |
| H7B  | 9626  | 6588 | 4909 | 82    |
| H36  | 11429 | 7590 | 3627 | 54    |
| H13  | 3869  | 4290 | 2356 | 45    |
| H16  | 6434  | 7416 | 1295 | 48    |
| H8   | 12701 | 7946 | 3000 | 51    |
| H38  | 10194 | 5104 | 1885 | 51    |
| H39  | 8946  | 4113 | 2686 | 49    |
| H24  | 6530  | 3438 | 1440 | 57    |
| H2A  | 2540  | 868  | 3456 | 57    |
| H9   | 2225  | 3200 | -275 | 63    |
| H19  | 7810  | 7730 | 1992 | 54    |

|      |       |      |      |     |
|------|-------|------|------|-----|
| H25A | 5230  | 1709 | 1423 | 64  |
| H25B | 6007  | 285  | 1580 | 64  |
| H3A  | 842   | 296  | 3640 | 63  |
| H3B  | 487   | 2080 | 3577 | 63  |
| H31  | 7228  | 3645 | 5314 | 72  |
| H20  | 8962  | 9079 | 2783 | 78  |
| H44  | 13889 | 9146 | 2205 | 85  |
| H7   | -318  | 436  | 12   | 76  |
| H6   | -18   | 424  | 1313 | 64  |
| H22  | 6933  | 8673 | 4483 | 90  |
| H23A | 8257  | 2551 | 1300 | 97  |
| H23B | 7505  | 1540 | 776  | 97  |
| H23C | 7923  | 847  | 1554 | 97  |
| H21  | 8498  | 9609 | 4035 | 90  |
| H0AA | 810   | 1796 | -776 | 79  |
| H1C  | 3098  | 3382 | 3831 | 98  |
| H1D  | 2225  | 2795 | 4397 | 98  |
| H1E  | 1939  | 4026 | 3757 | 98  |
| H42  | 12179 | 7941 | 391  | 100 |
| H30  | 5822  | 2327 | 5856 | 92  |
| H28  | 4827  | 952  | 3796 | 74  |
| H43  | 13606 | 9236 | 913  | 103 |
| H29  | 4604  | 1025 | 5102 | 93  |

#### 4. References.

- [1] M. Shang, S.-Z. Sun, H.-X. Dai, J.-Q. Yu, *J. Am. Chem. Soc.* **2014**, *136*, 3354.
- [2] R. Giri, N. L. Maugel, B. M. Foxman, J.-Q. Yu, *Organometallics*. **2008**, *27*, 1667.
- [3] I. G. Dorota, C. Grzegorz, K. W. Agata, T. Piotr, D. Krystyna, *Eur. J. Med. Chem.* **2013**, *69*, 863.
- [4] M. Shang, M.-M. Wang, H.-X. Dai, J.-Q. Yu, *Angew. Chem. Int. Ed.* **2013**, *52*, 4457.
- [5] J. M. Neely, R. Tomislav, *J. Am. Chem. Soc.*, **2013**, *135*, 66.
- [6] M. Shang, S.-Z. Sun, H.-X. Dai, J.-Q. Yu, *J. Am. Chem. Soc.* **2014**, *136*, 3354.

- [7] R. Kupfer, S. Meier, E. Würthwein, *Synthesis*. **1984**, 08, 688.
- [8] C. Wolf, S.-L. Liu, B. Reinhardt, *Chem. Commun.* **2006**, 40, 4242.
- [9] U. Sharma, P. Kumar, N. Kumar, *Adv. Synth. Catal.* **2010**, 352, 1834.
- [10] M.-J. Jin, D.-H. Lee, *Angew. Chem. Int. Ed.* **2010**, 49, 1119.
- [11] G. D. Vo, J. F. Hartwig, *J. Am. Chem. Soc.* **2009**, 131, 11049.
- [12] M. Bonnet, U. F. Jack, D. A. Chan, et al. *Bioorg. Med. Chem.* **2011**, 19, 3347.
- [13] S. Li, J. Huang, G. Chen, et al. *Chem. Commun.* **2011**, 47, 12840.
- [14] O. P. Shkurko, E. P. Khmeleva, *Chemischer Informationsdienst*, **1979**, 10, 14.
- [15] L. A. Saavedra, V. C. Gabriel, V. V. Kouznetsov, et al. *Synthesis*. **2010**, 4, 593.
- [16] Z. J. Jia, C. Venkataramani, W. Huang, M. Mehrotra, Y. Song, Q. Xu, S. M. Bauer, A. W. O. Pandey, Patent 2009136995, 2009.

## 5. NMR Spectra for New Compounds.

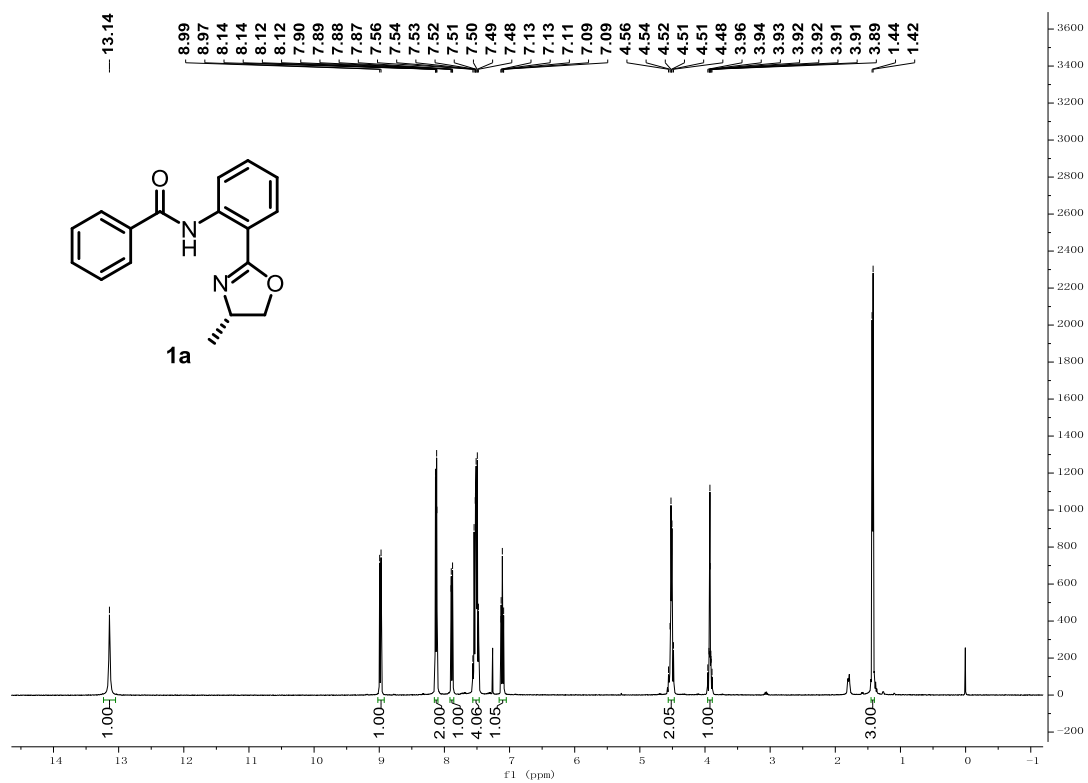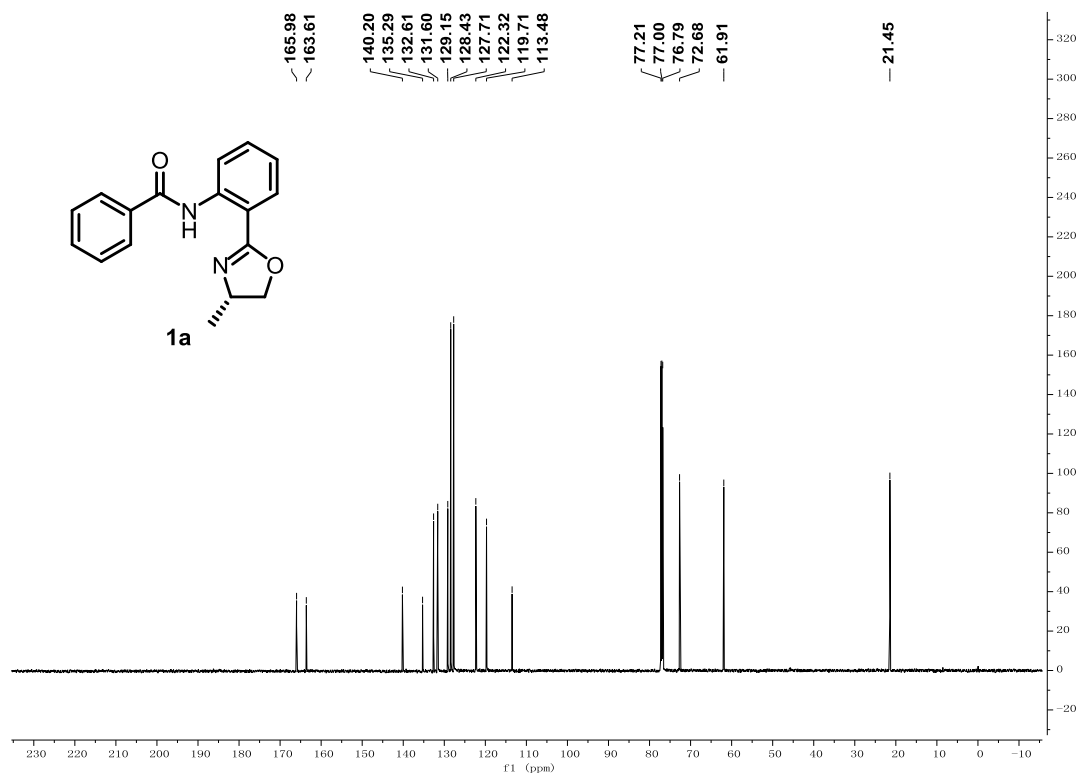



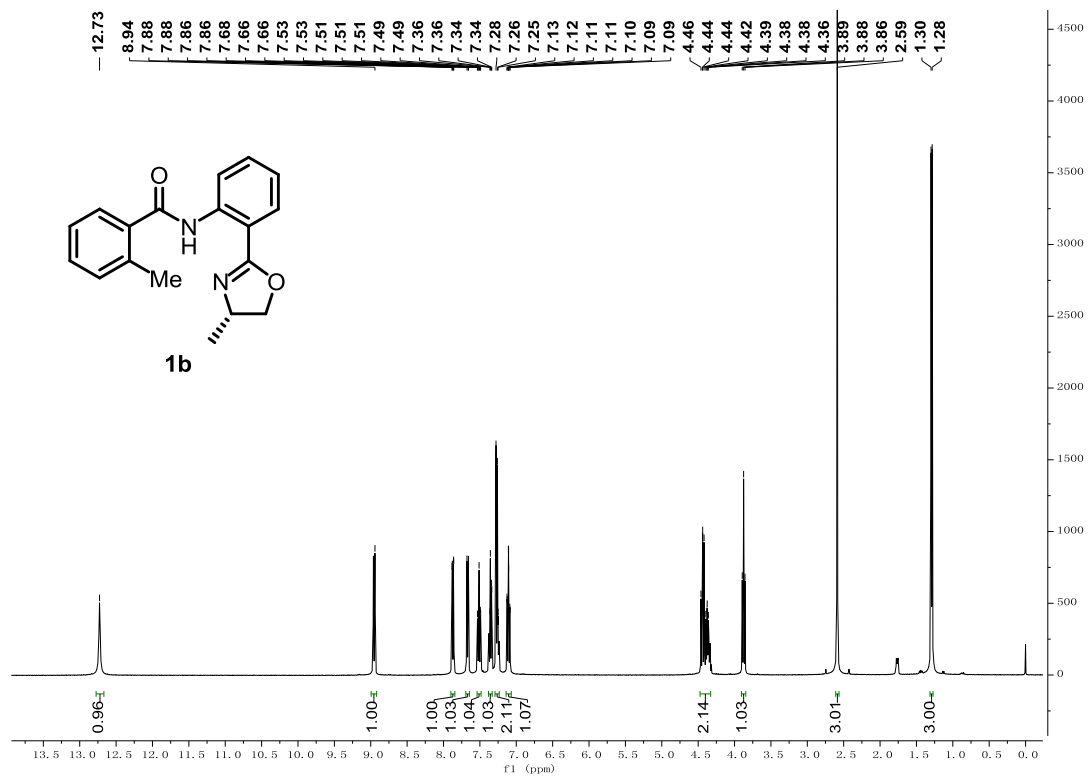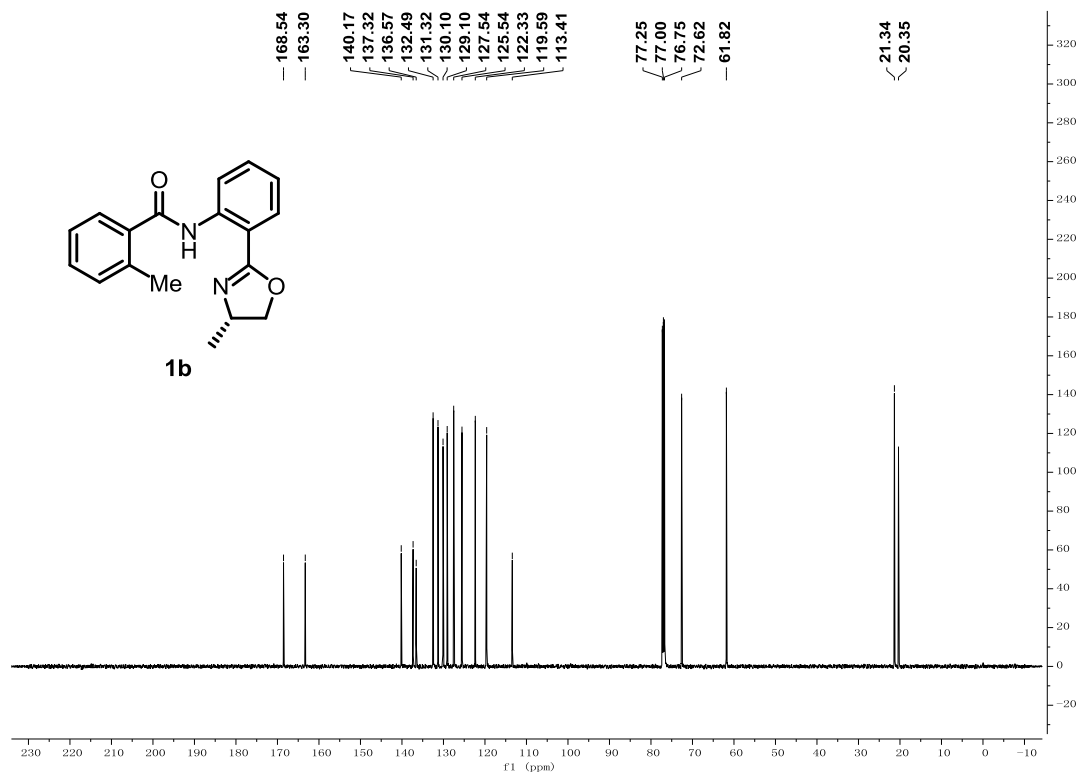

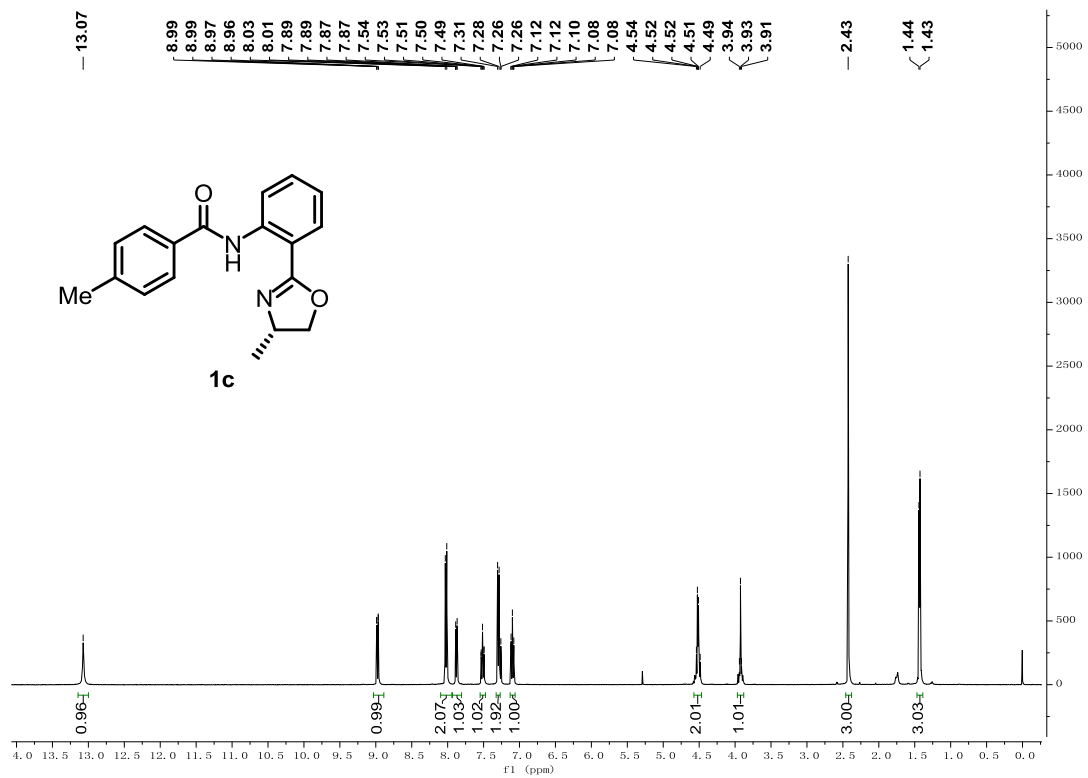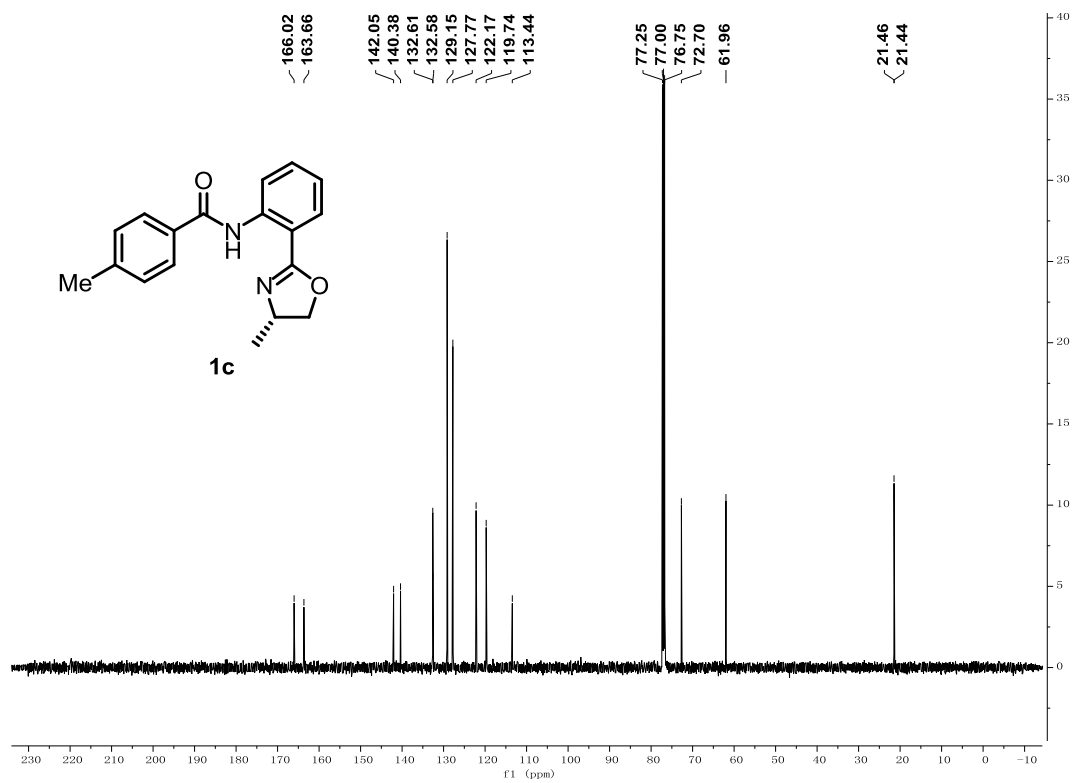

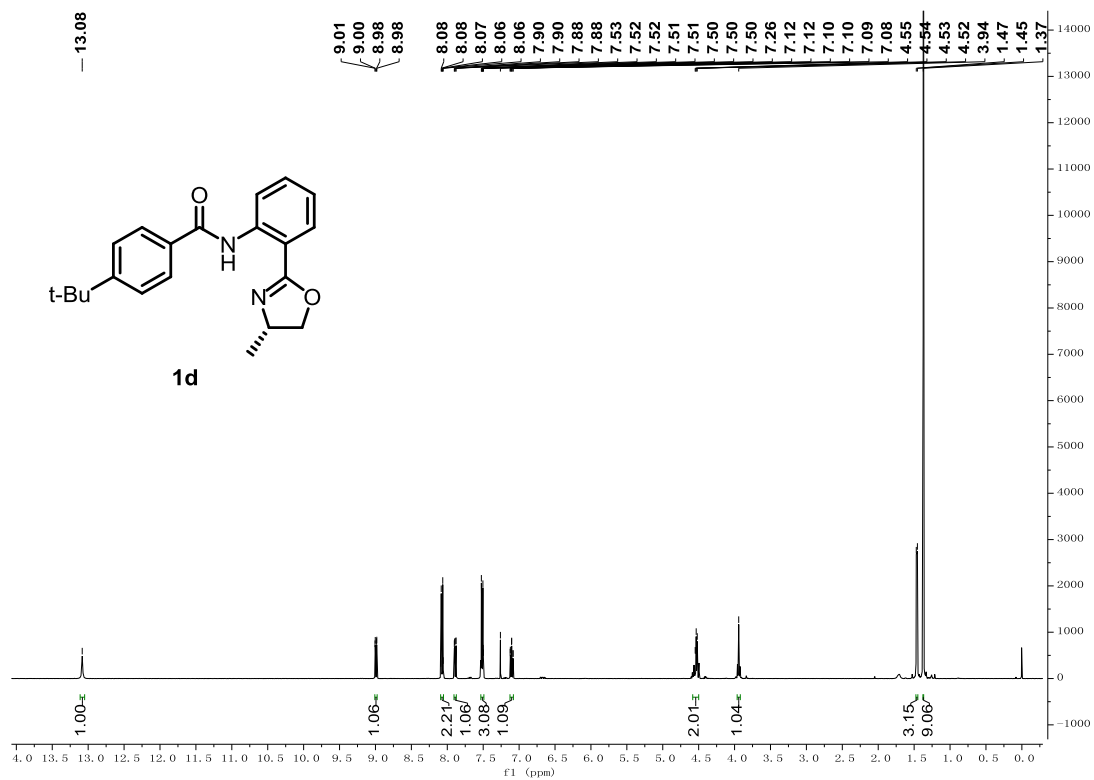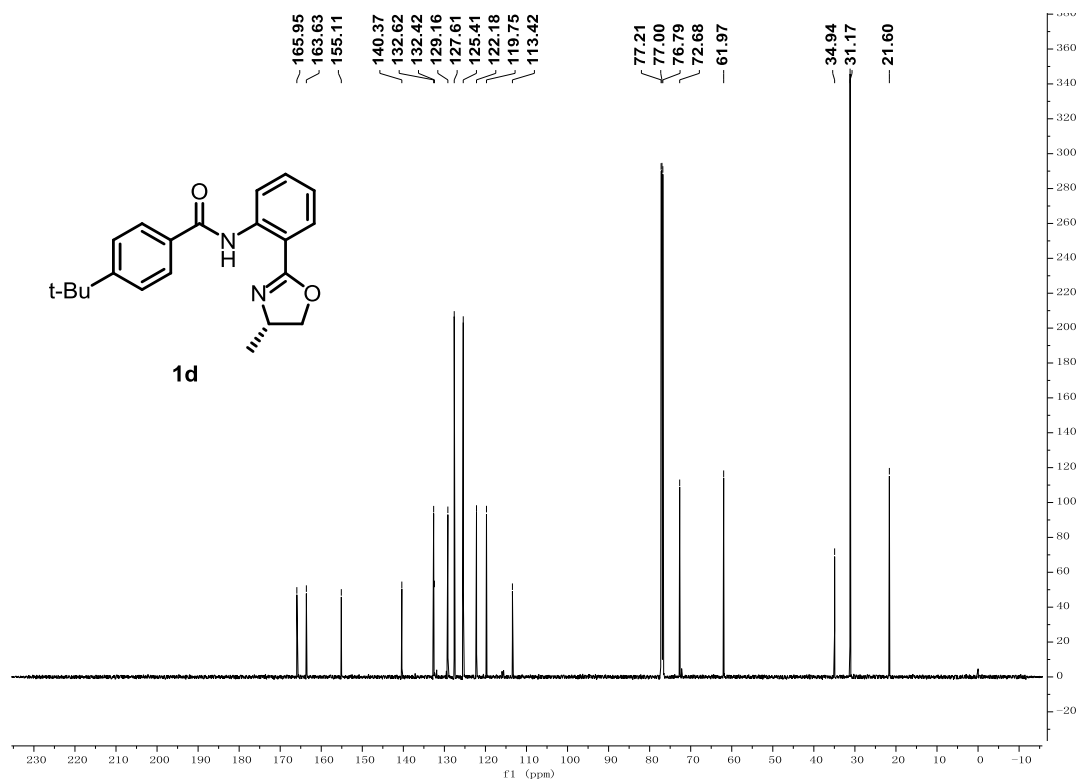

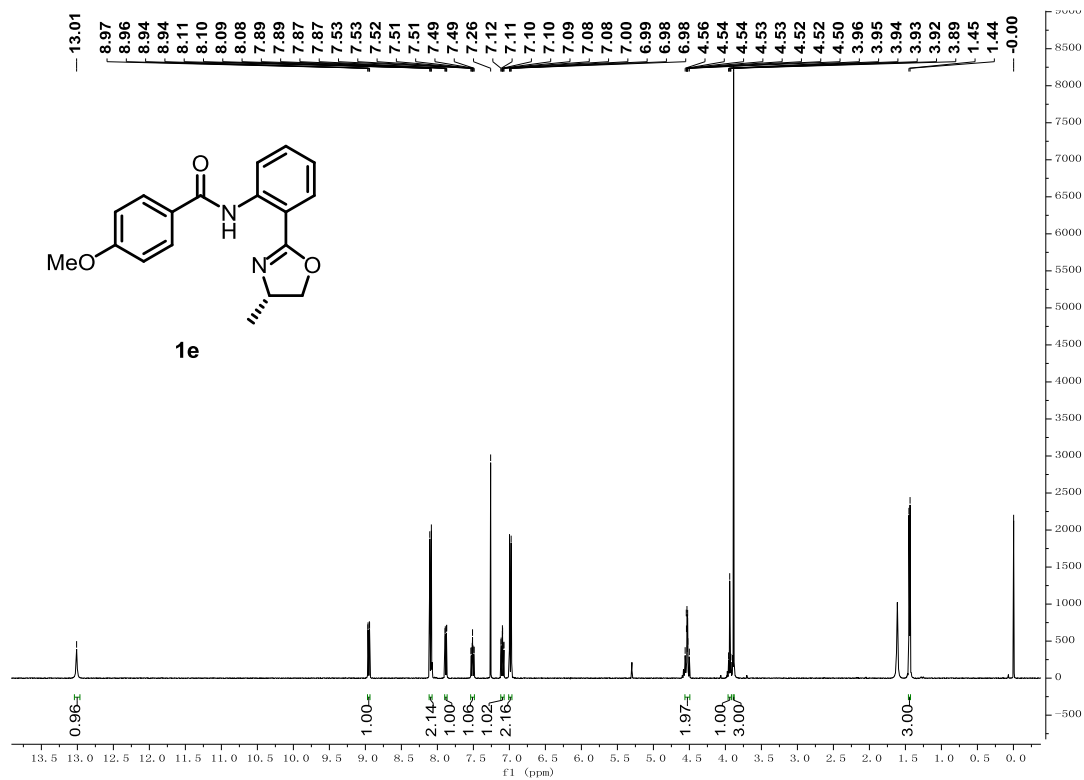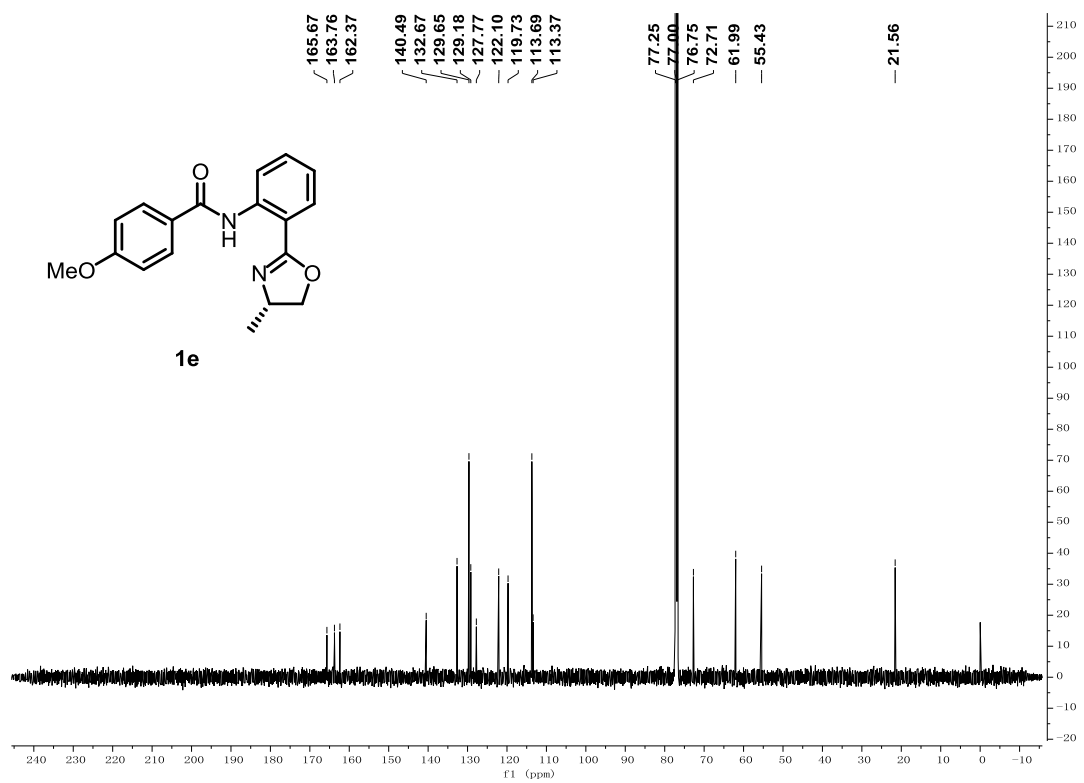

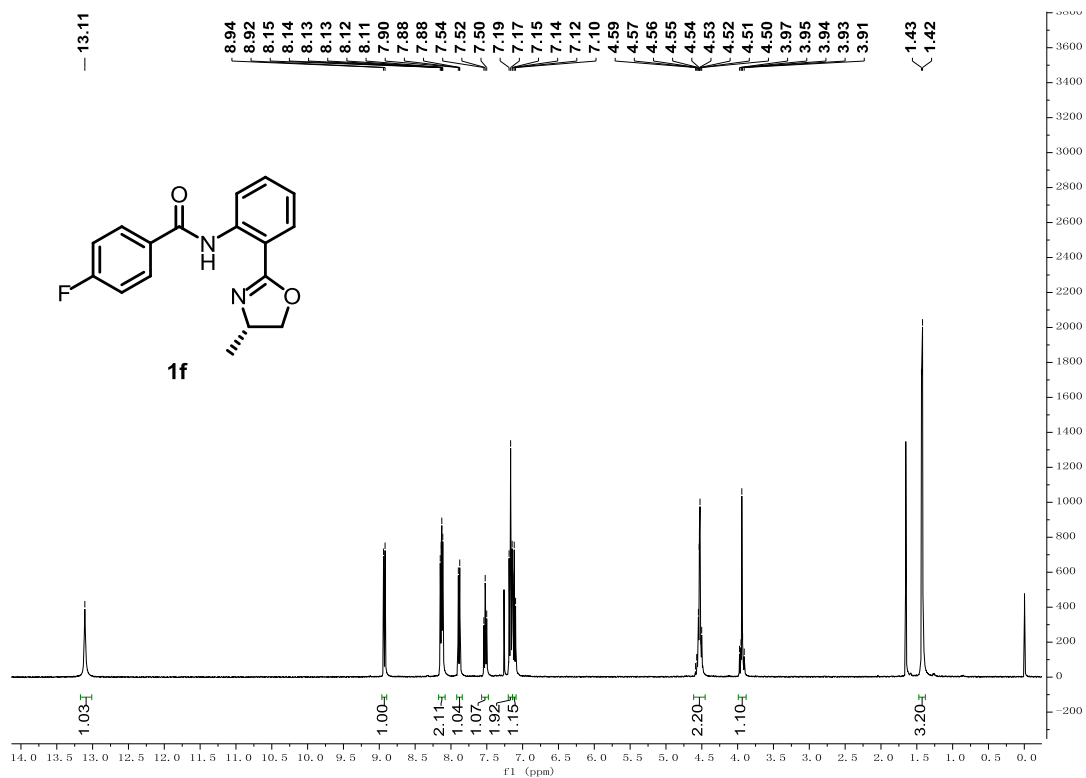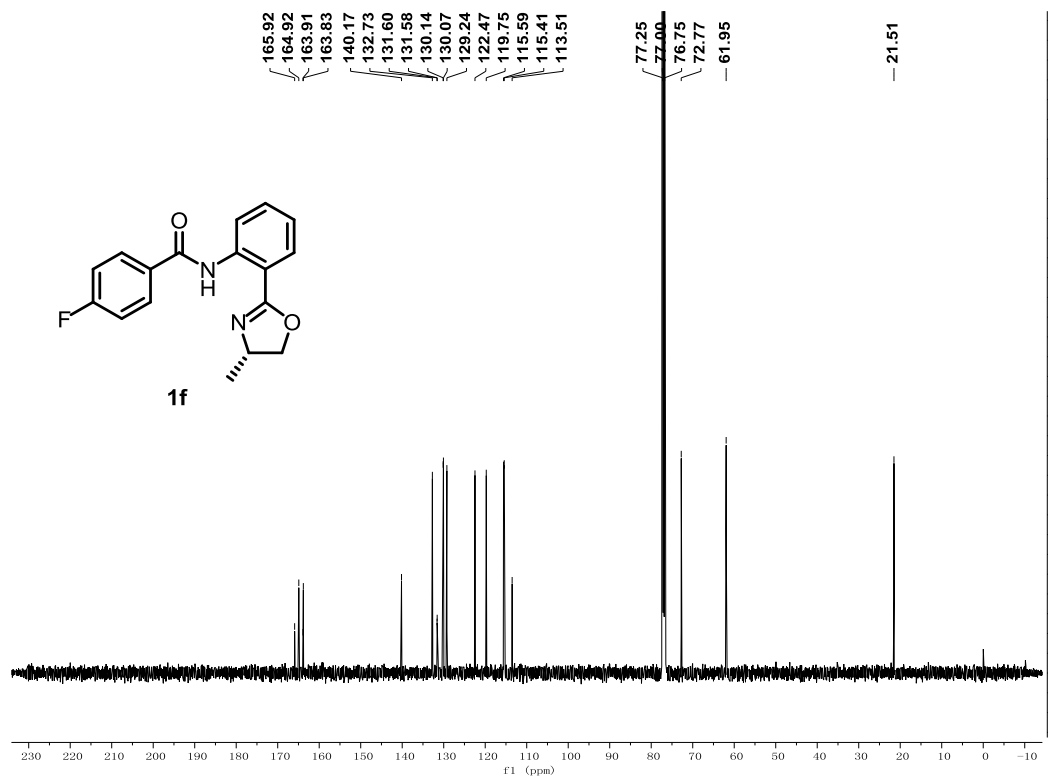

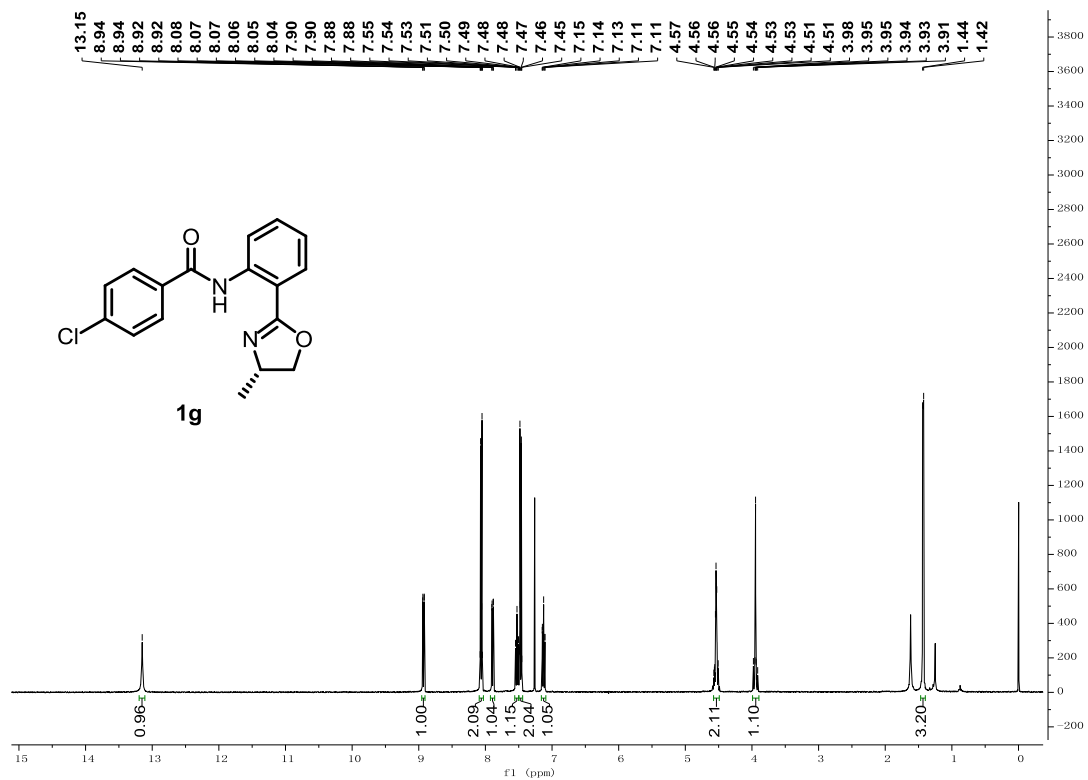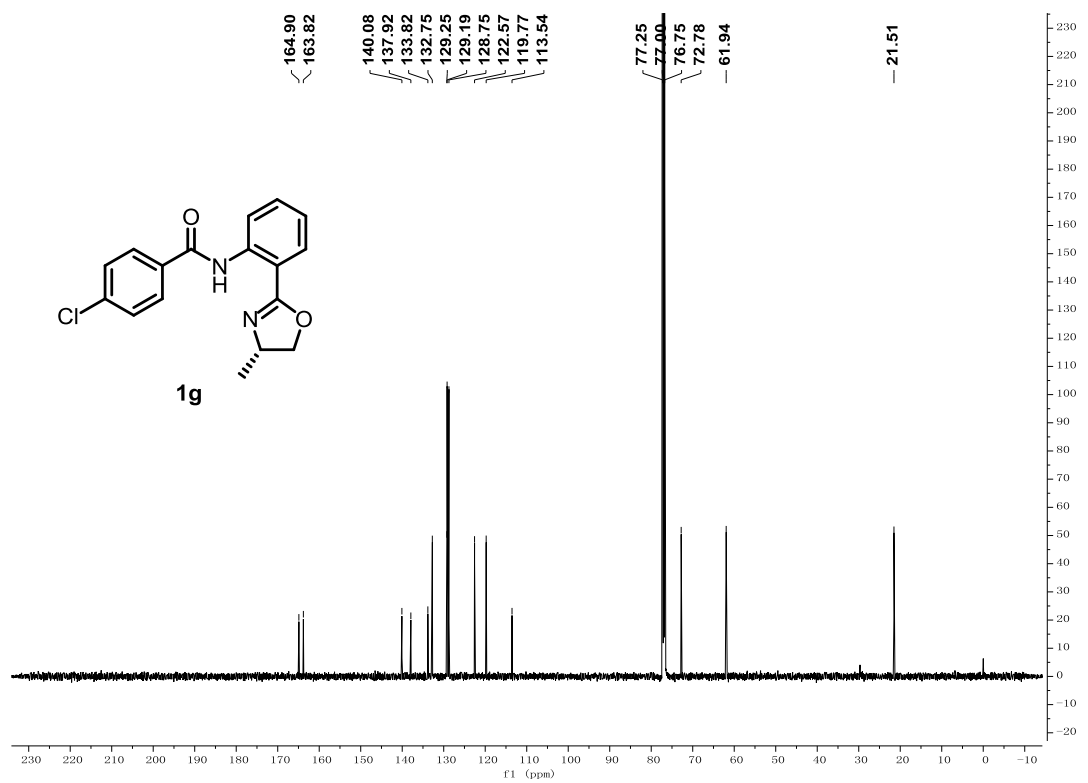

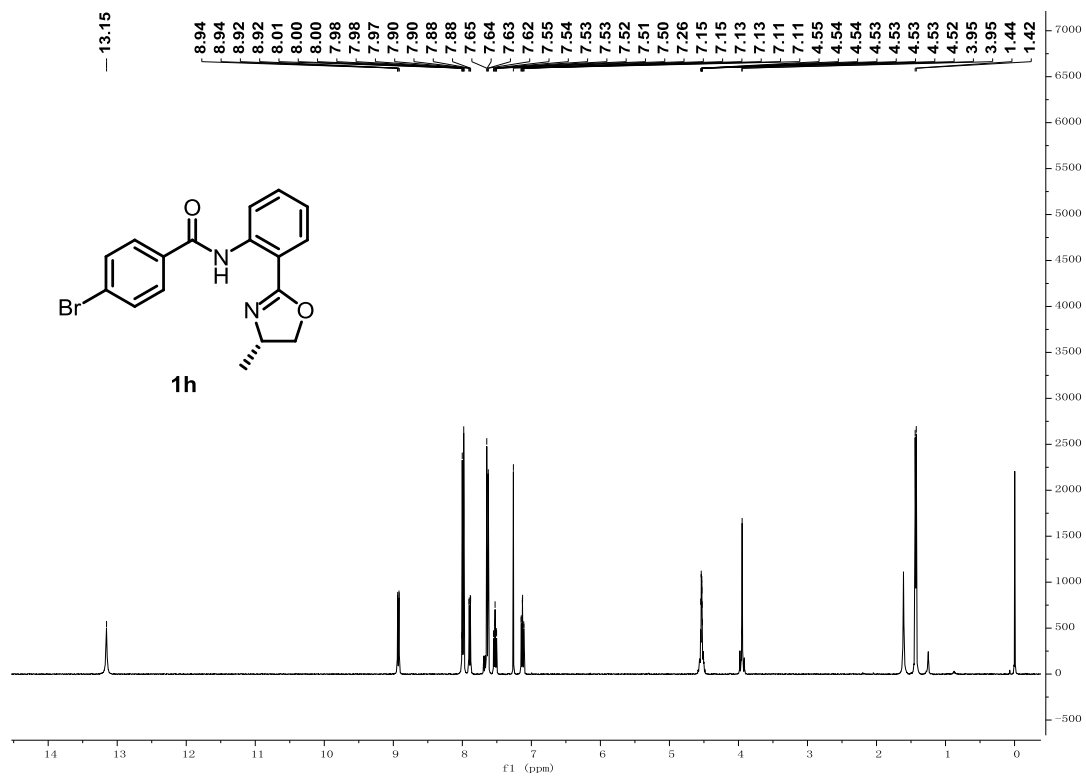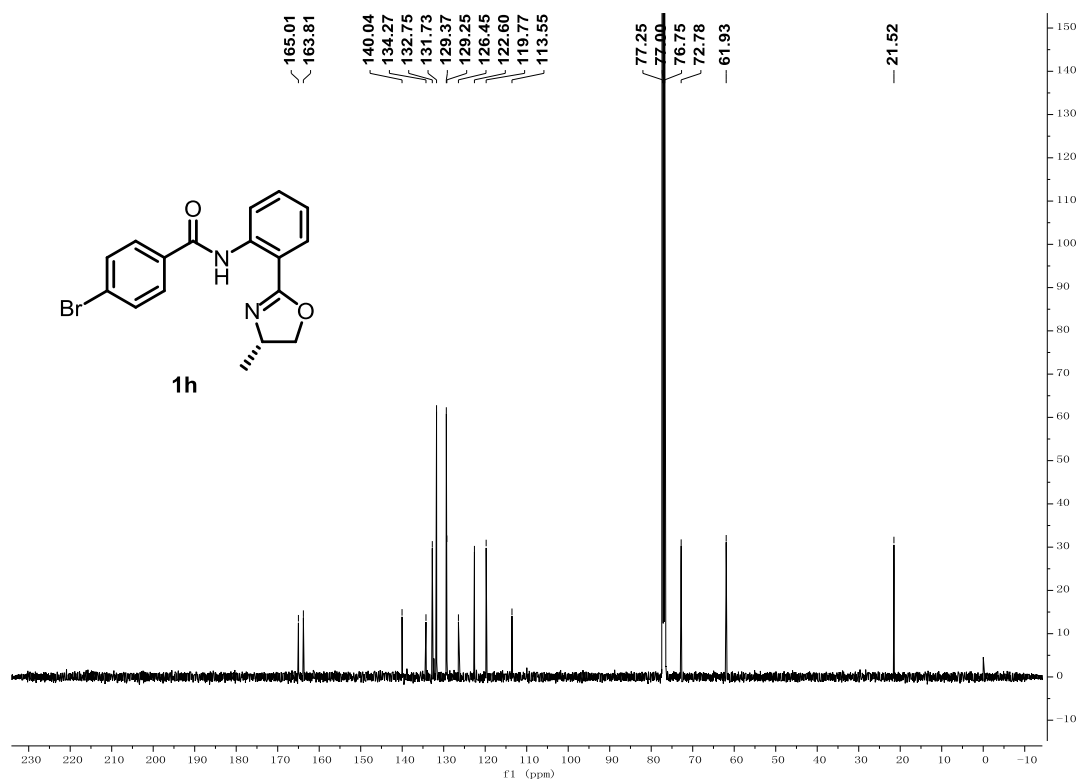

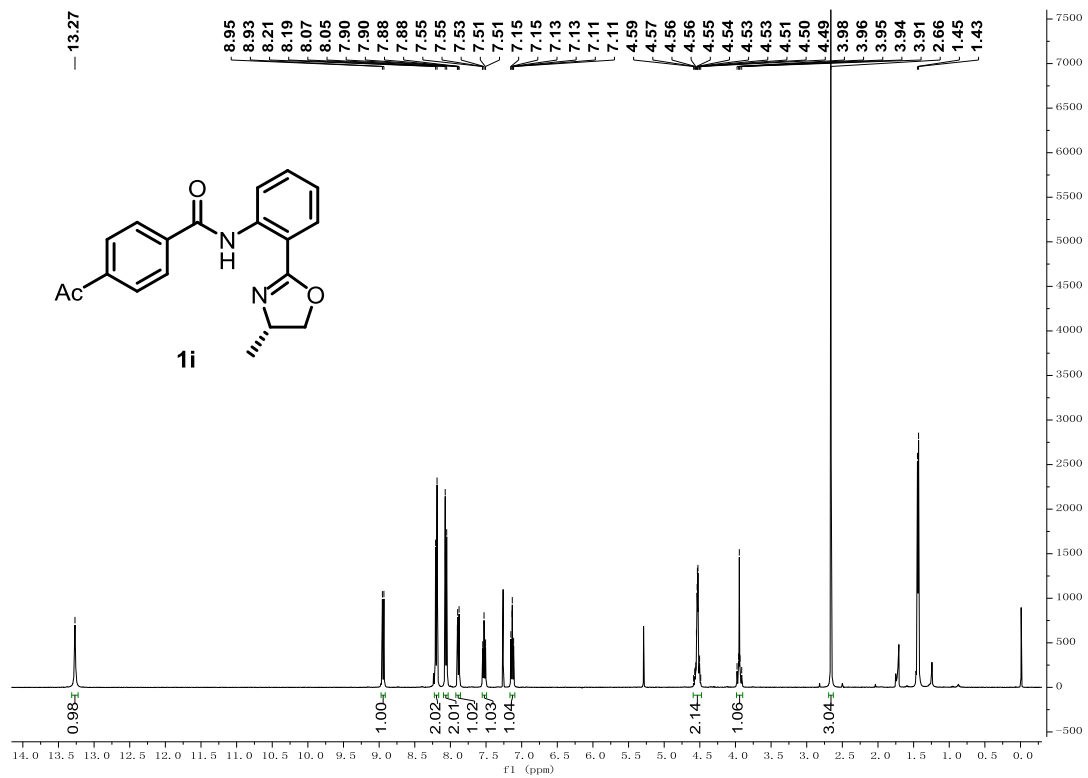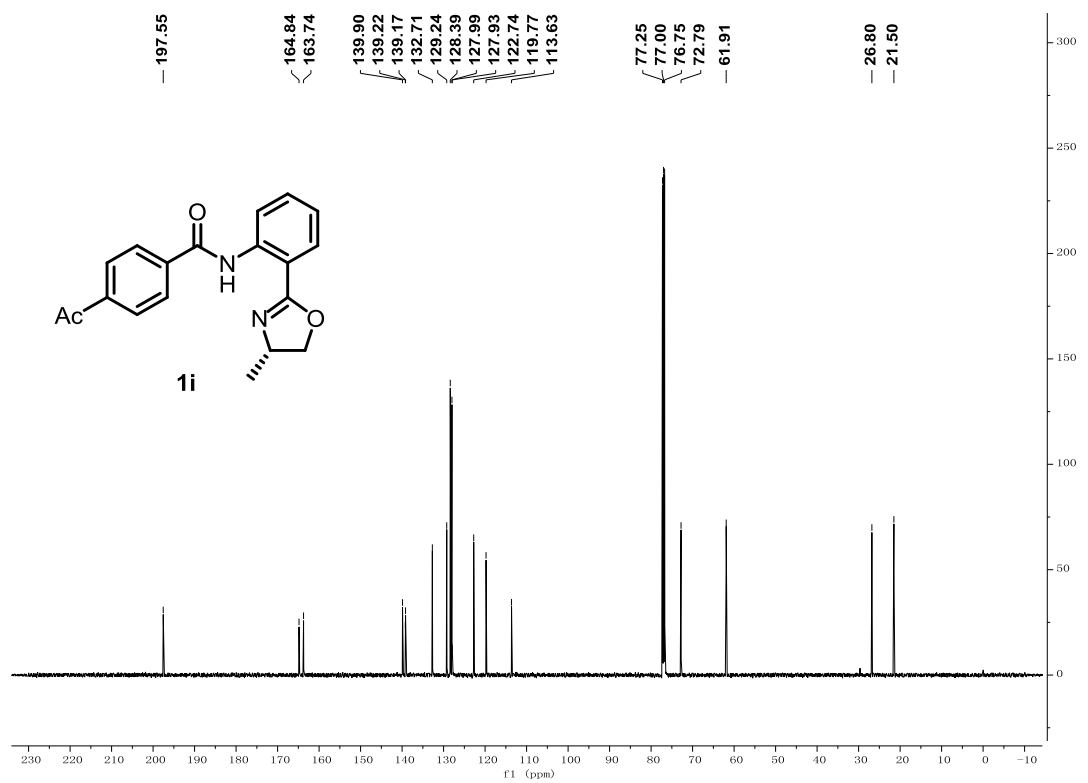



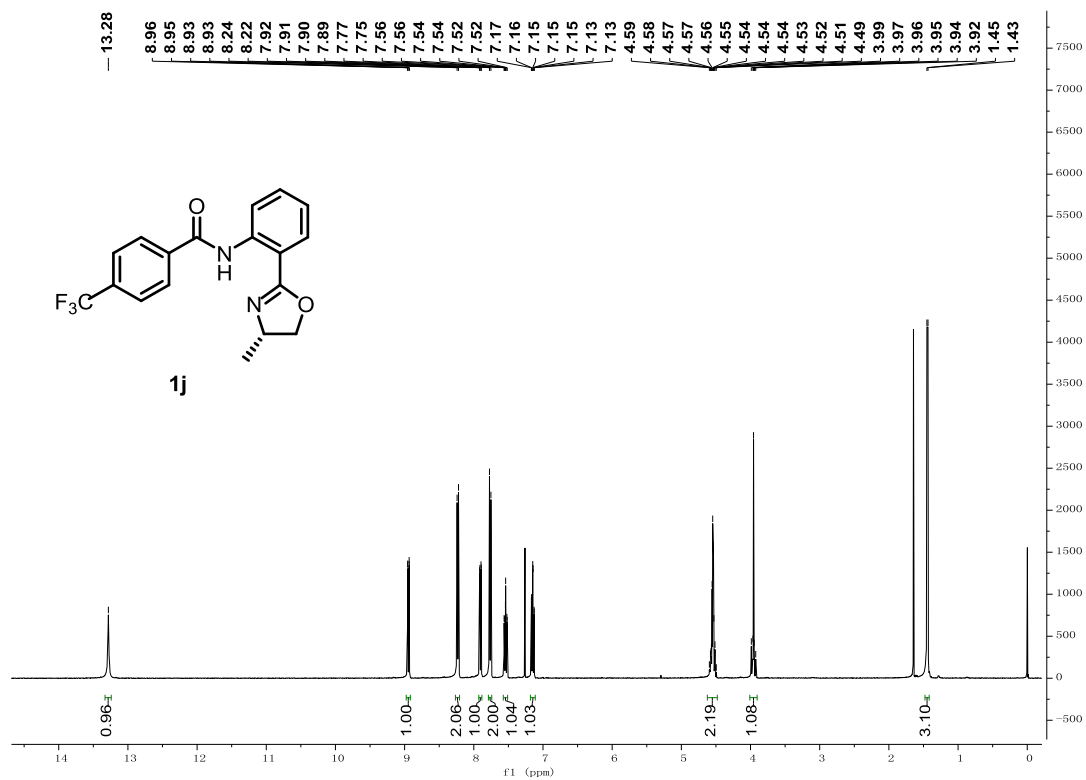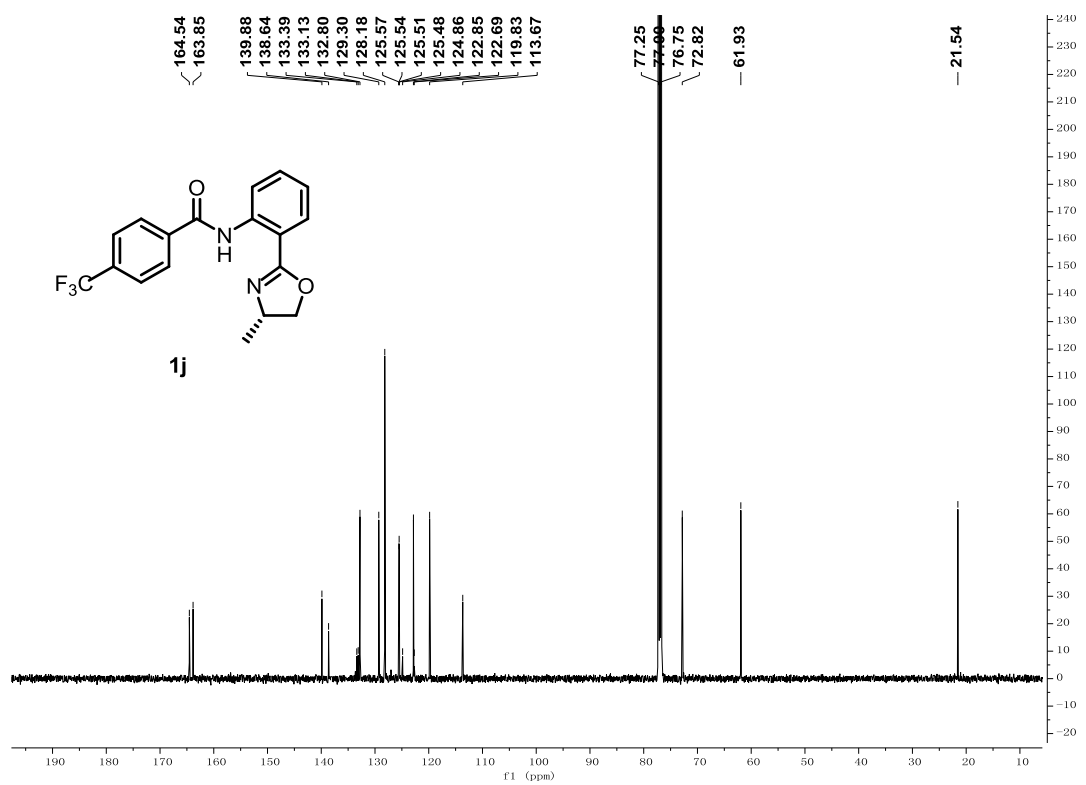

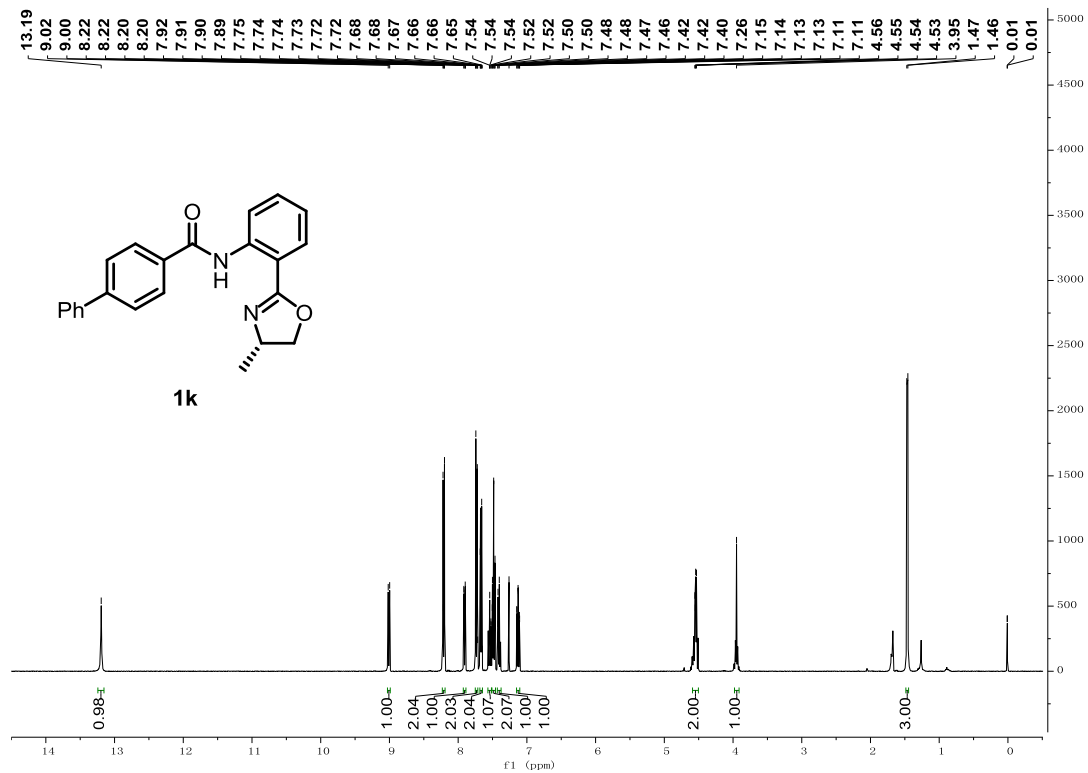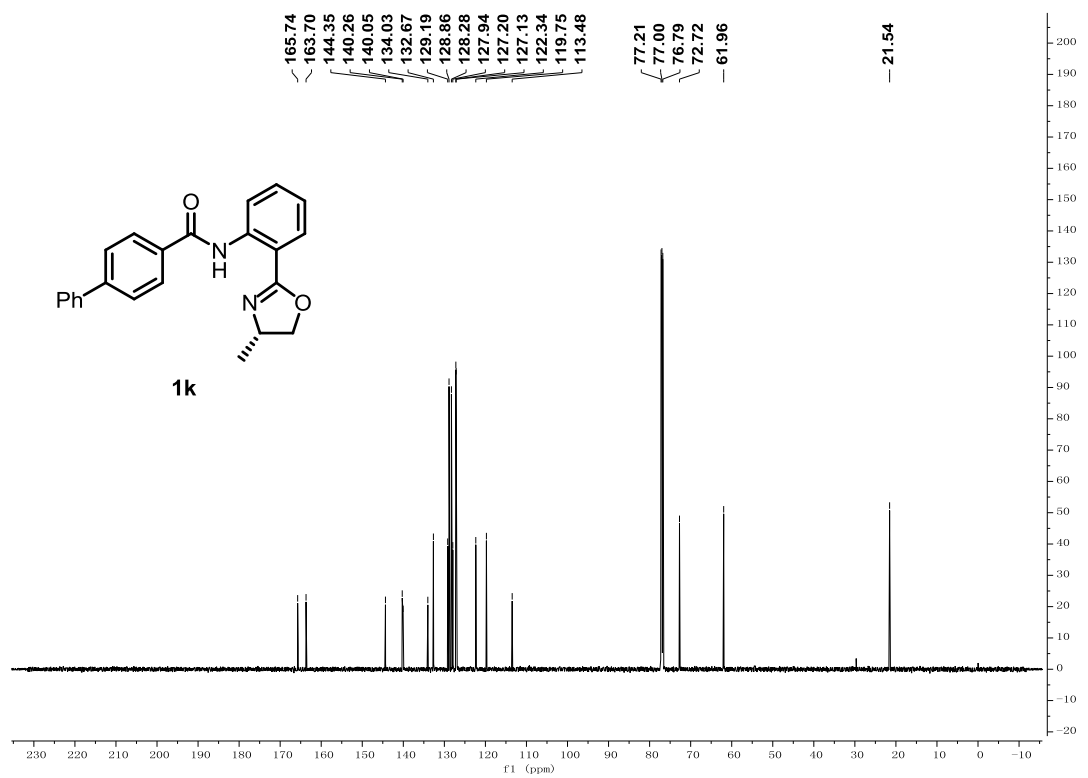

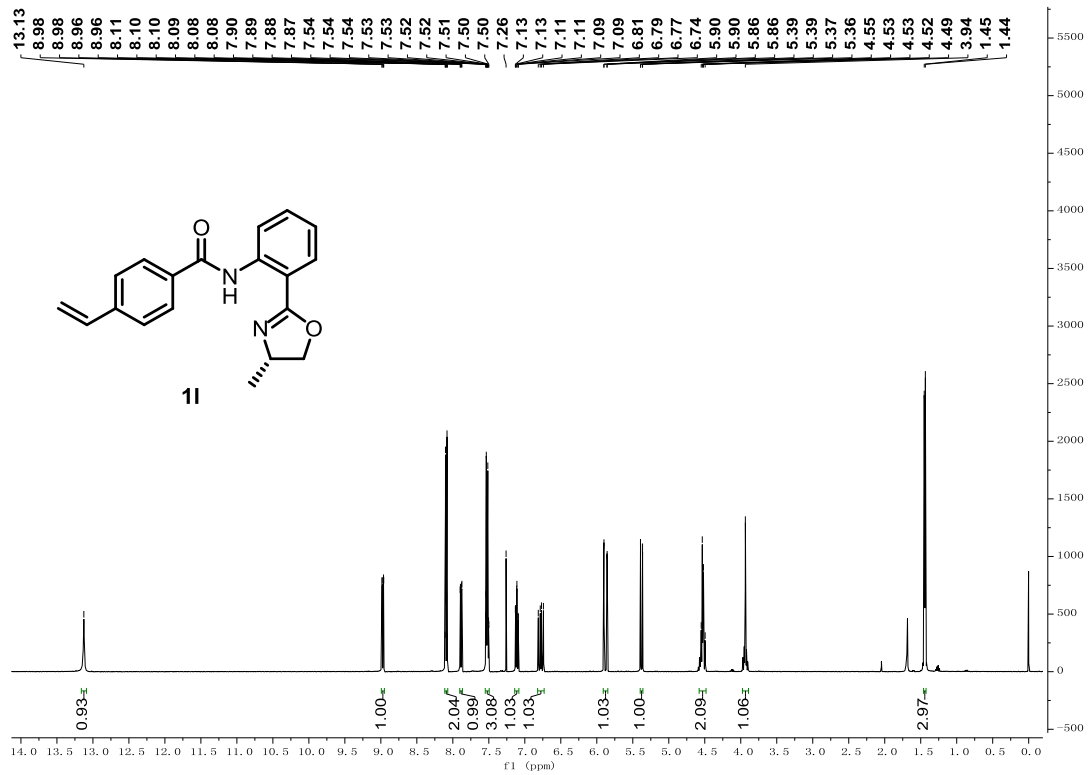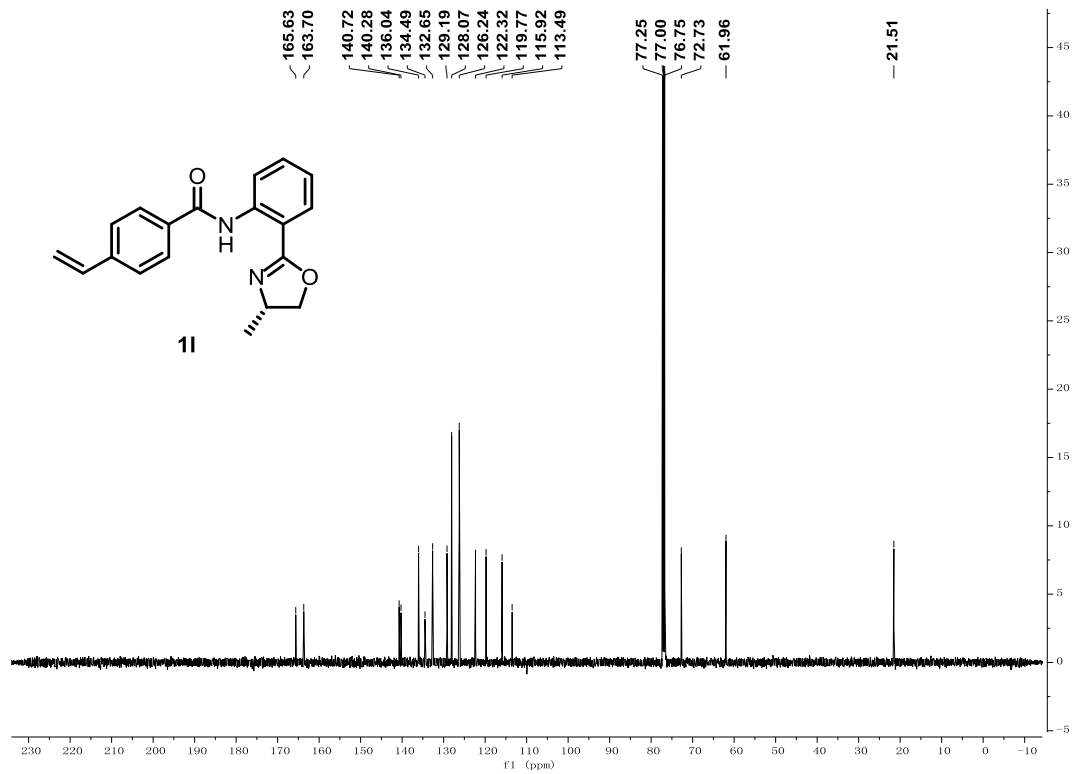

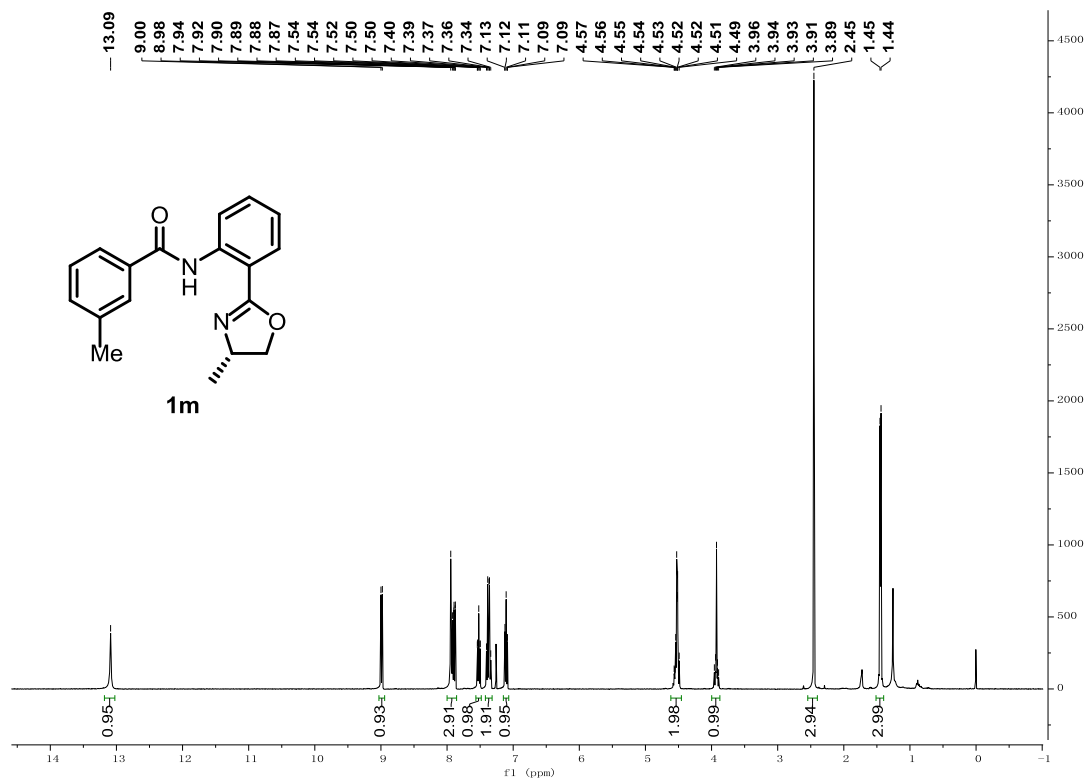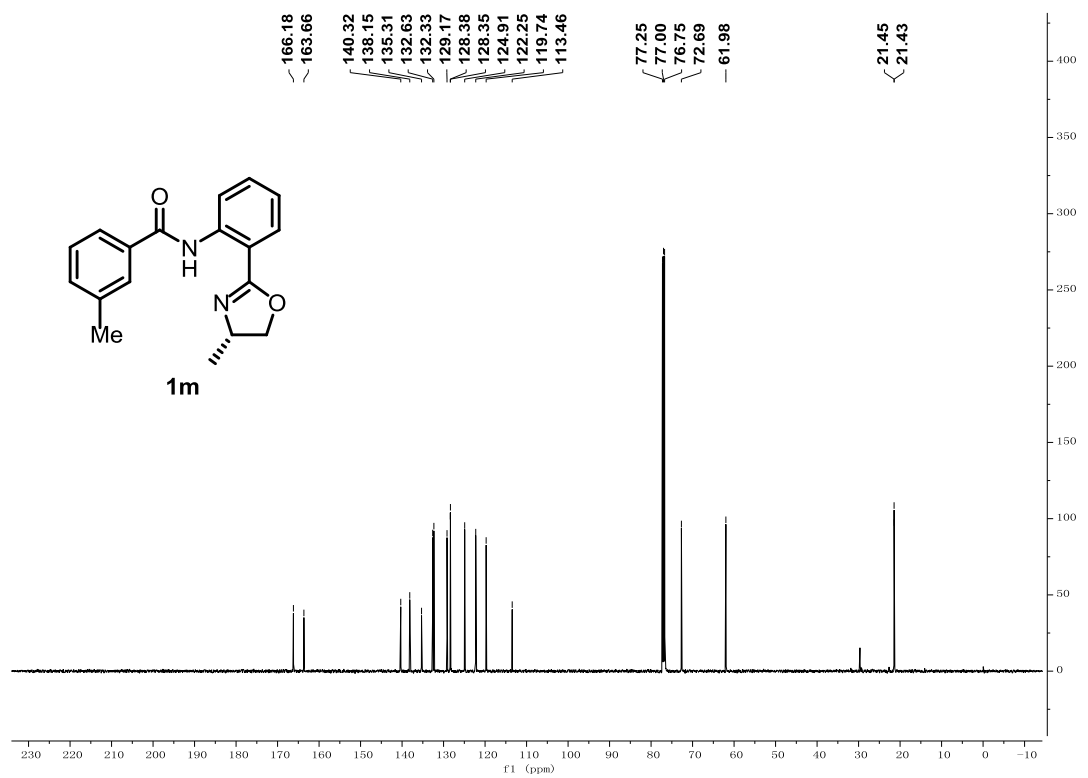

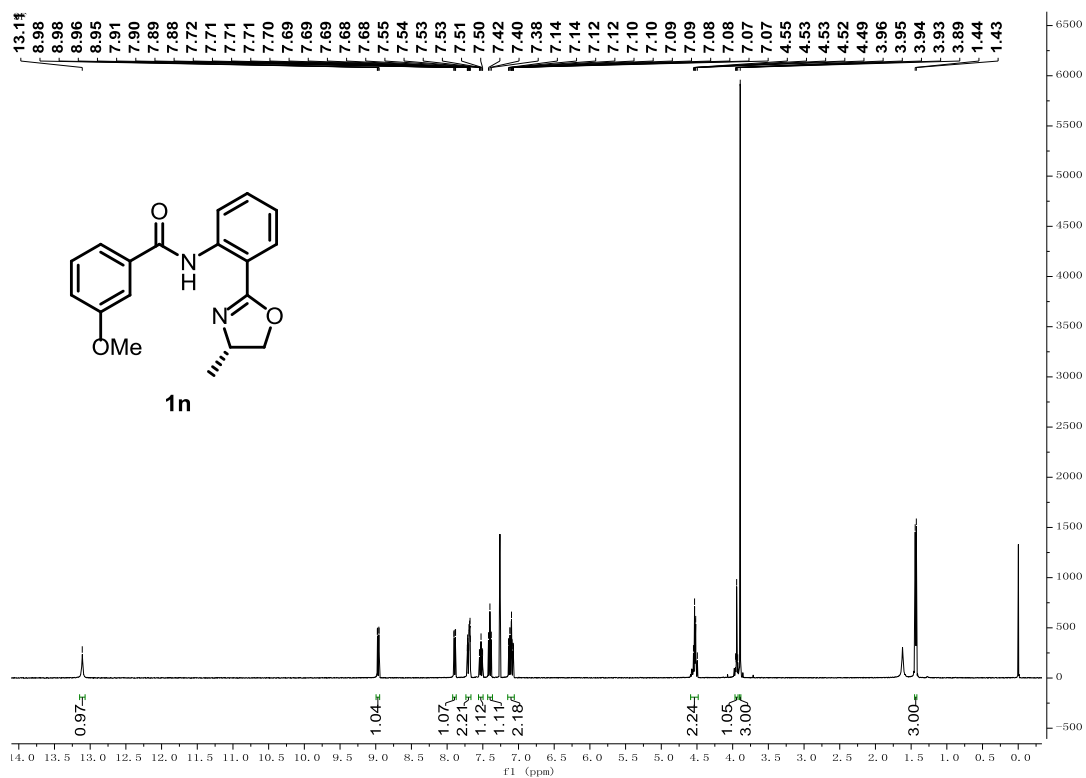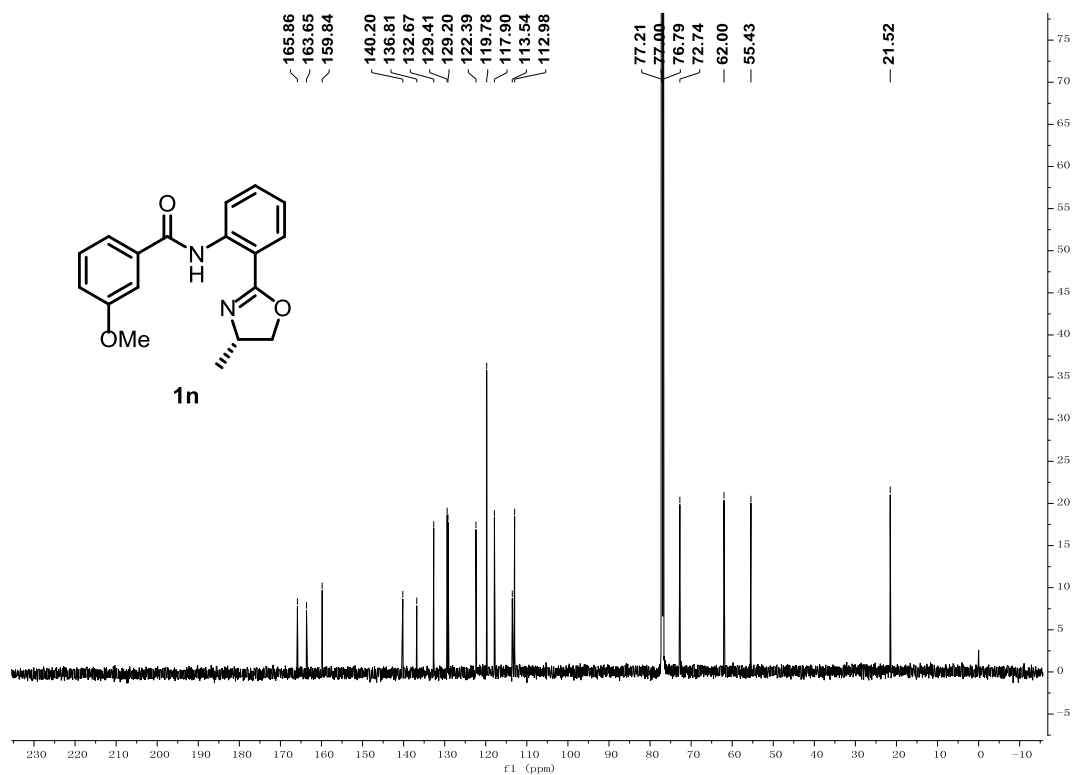

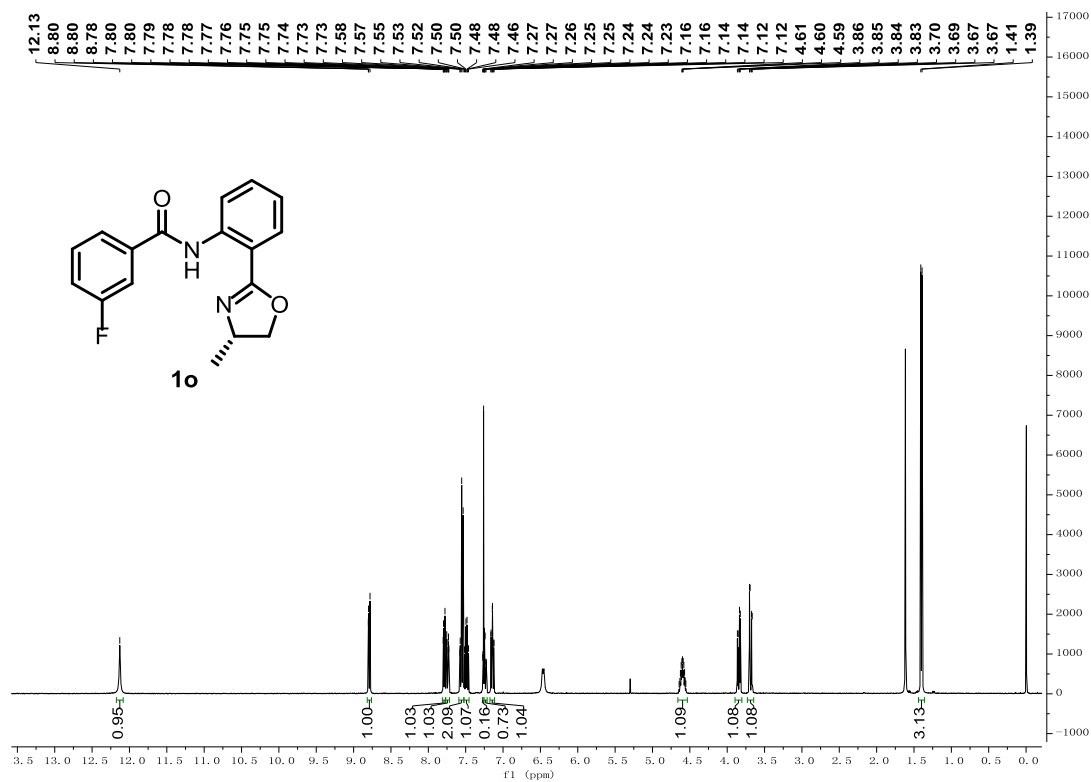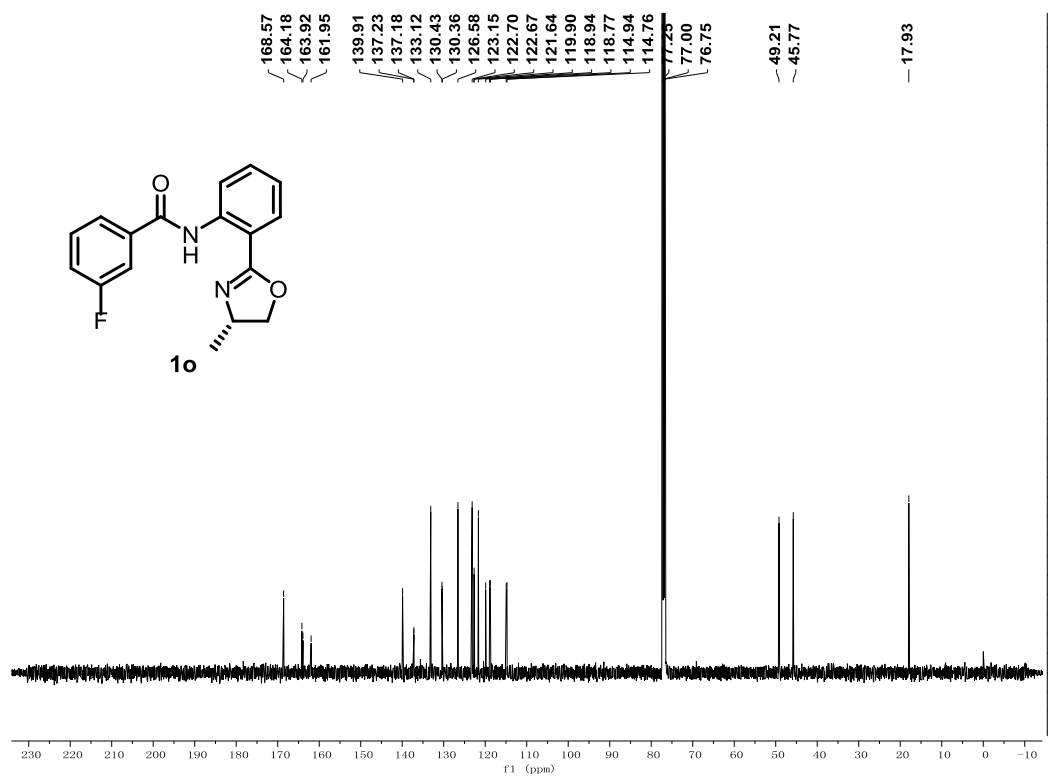

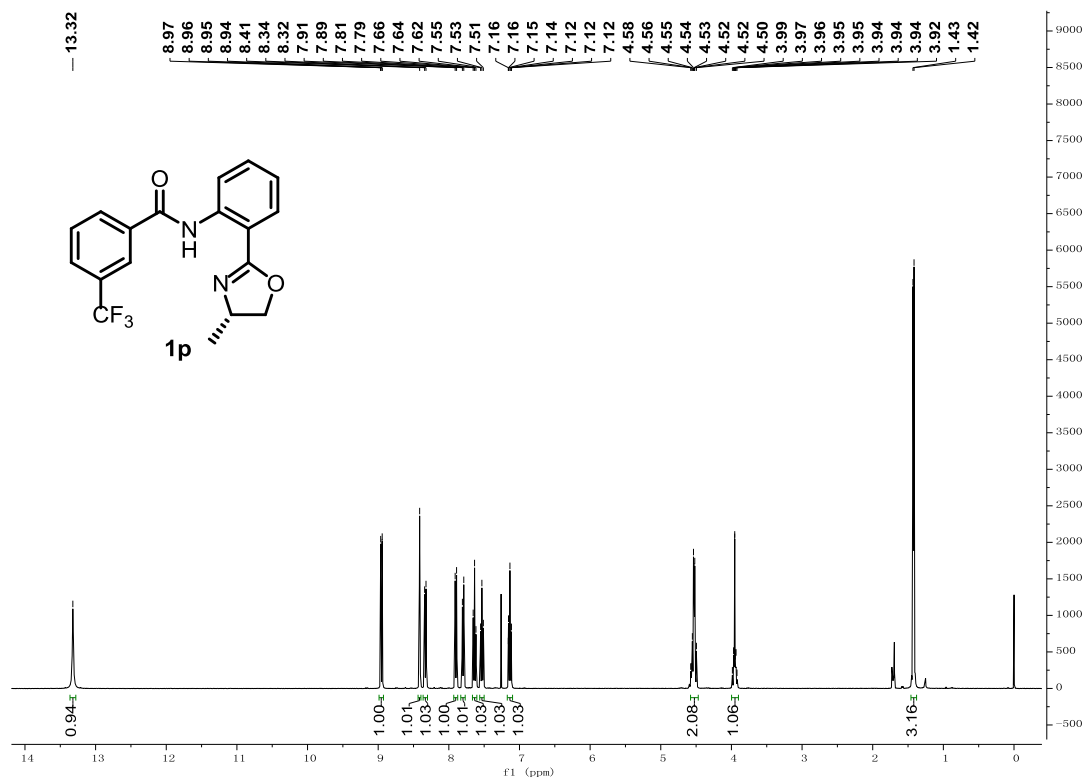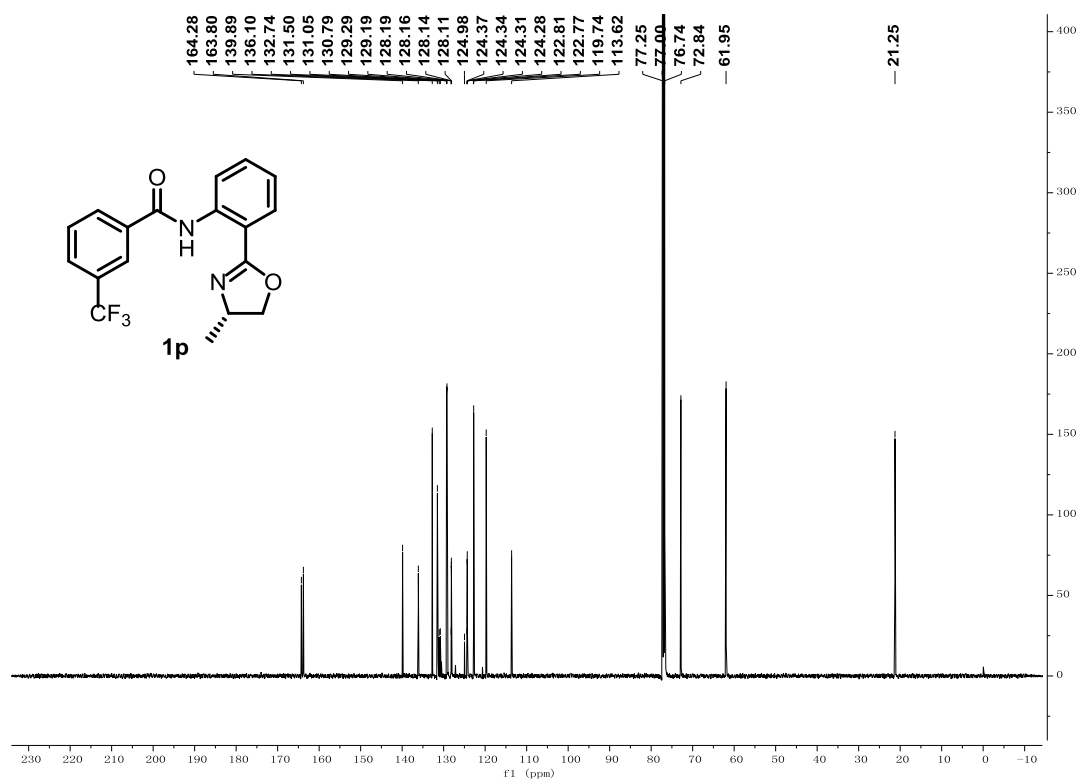

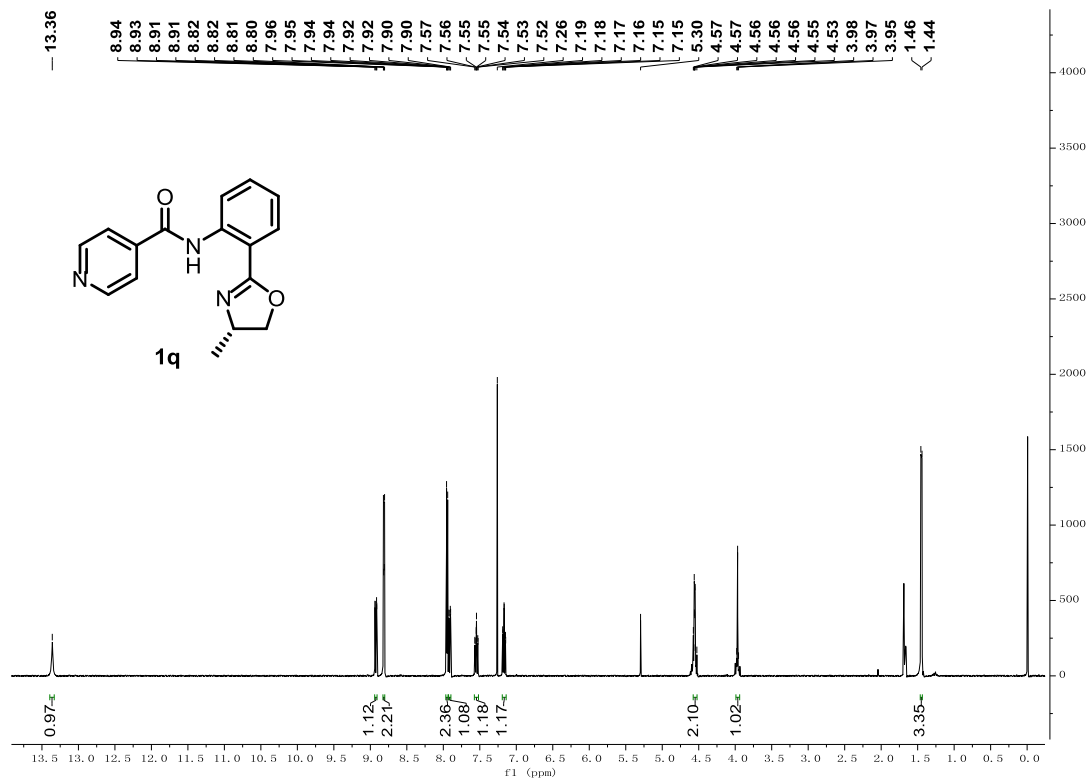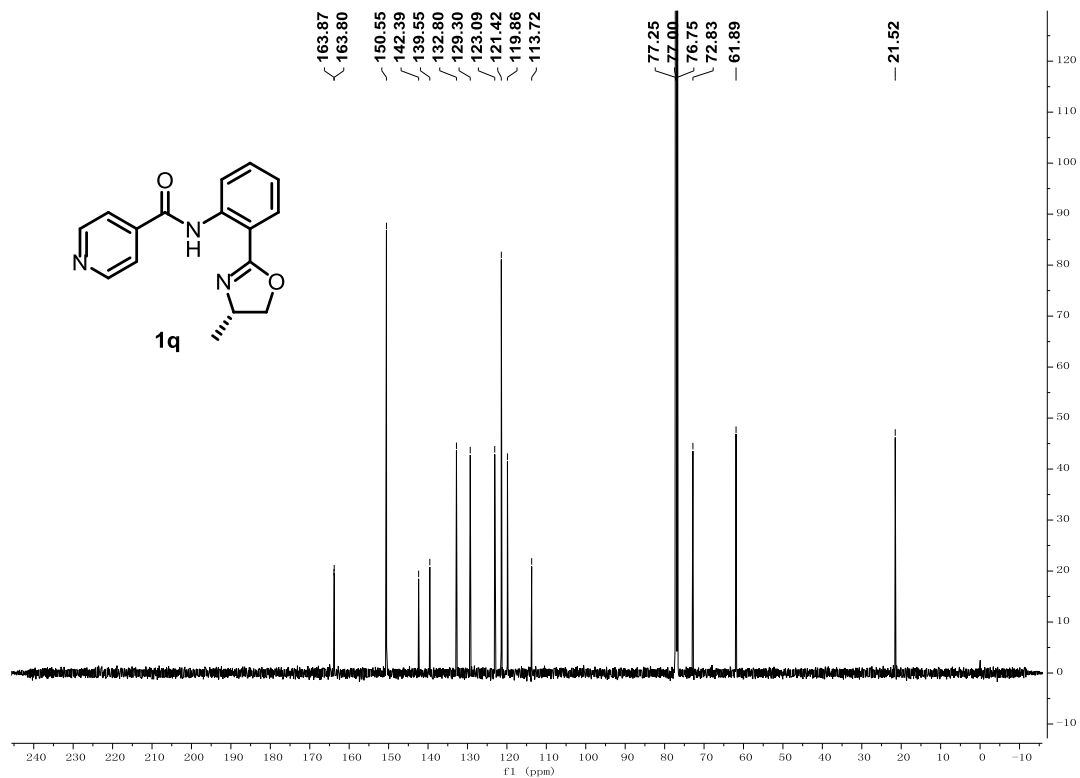



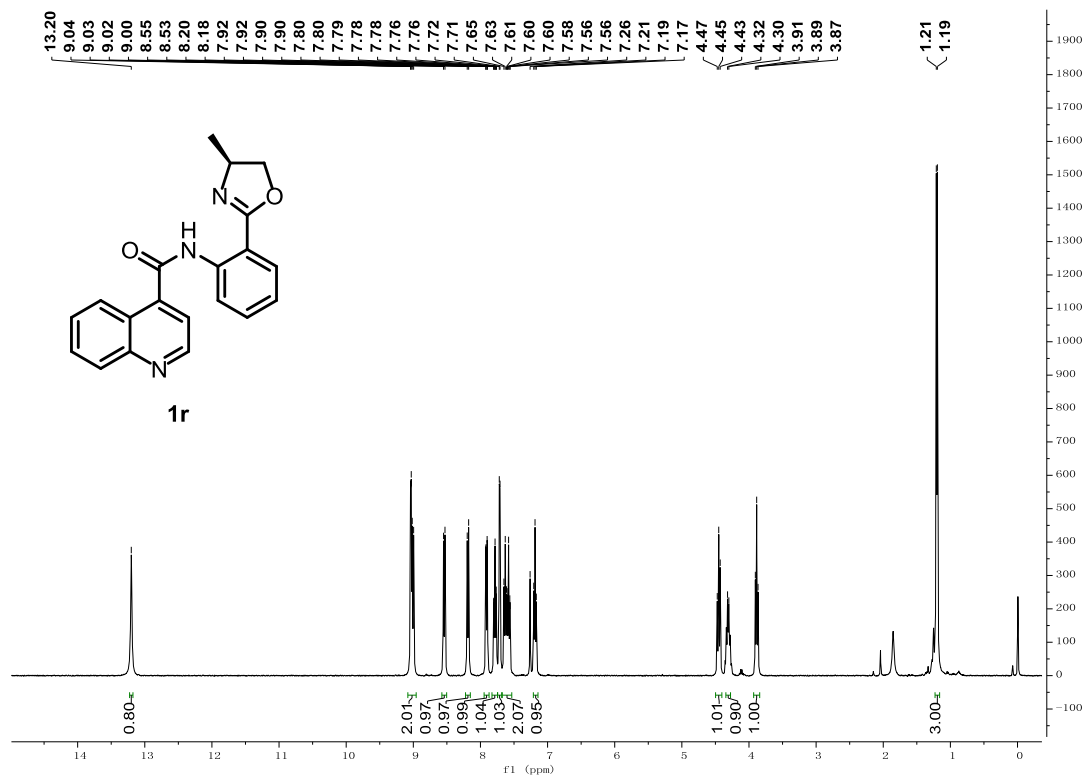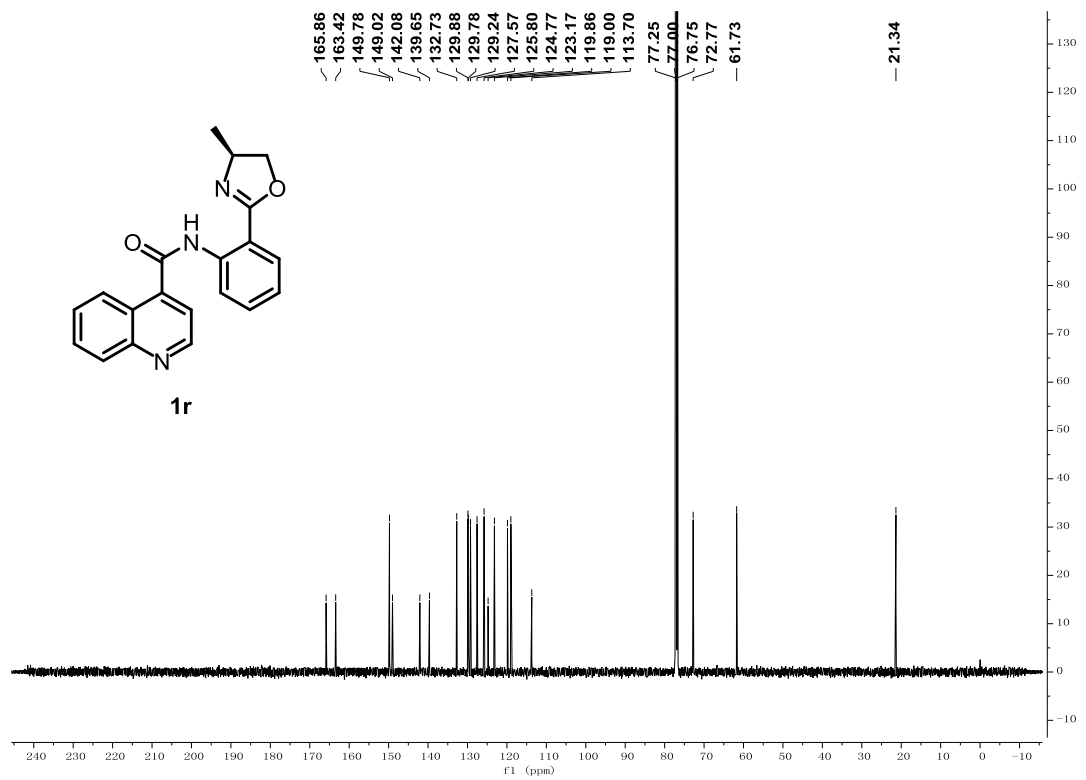

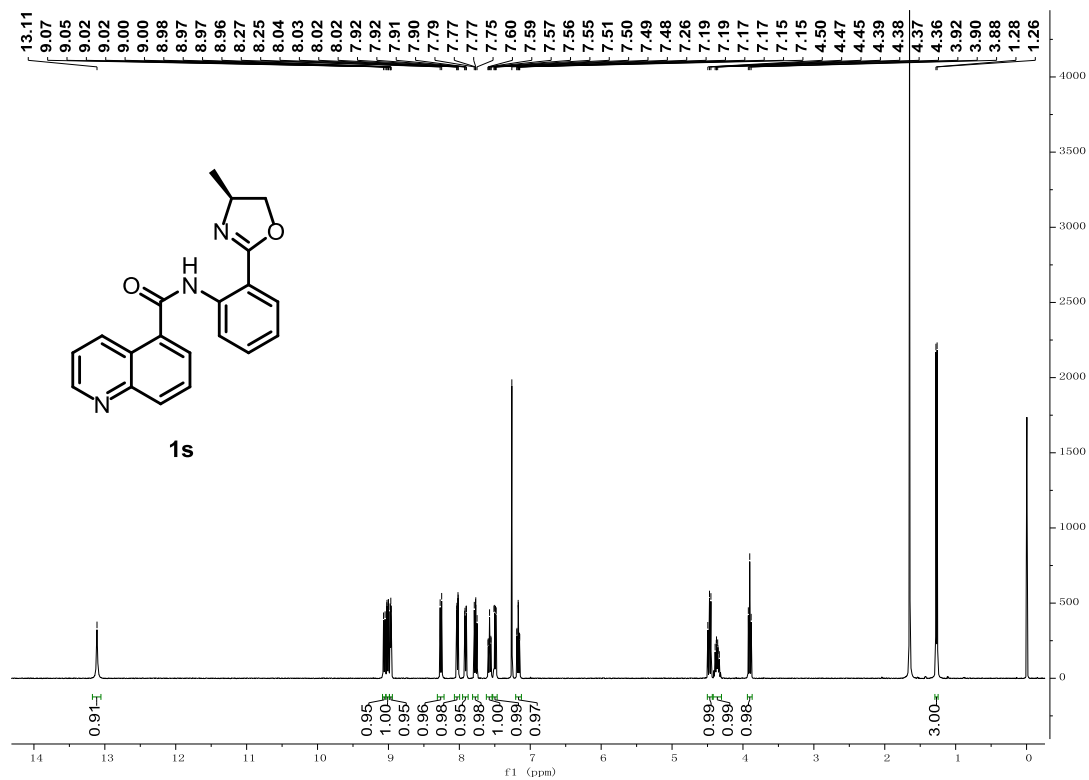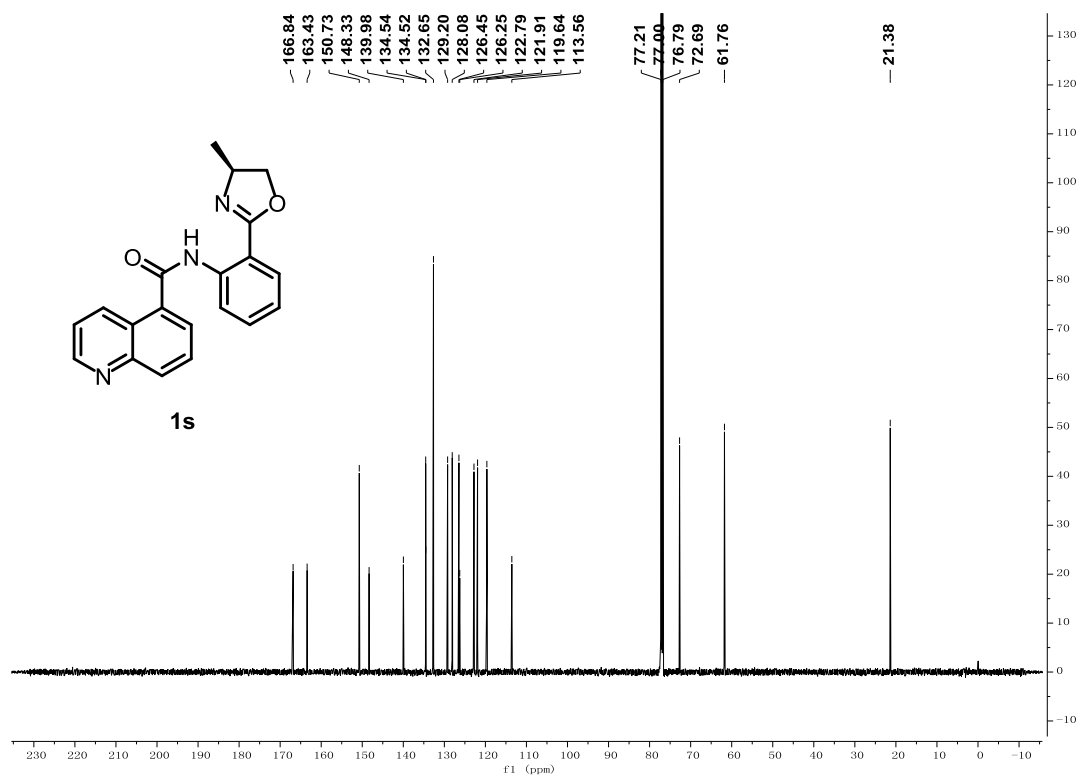

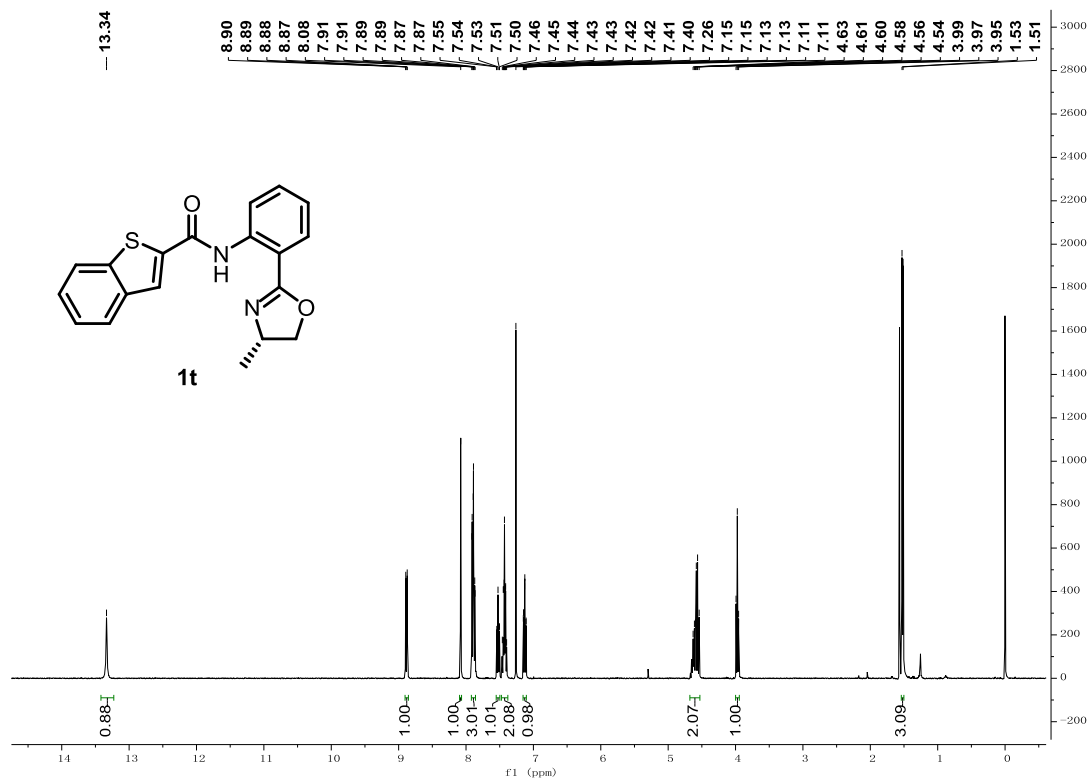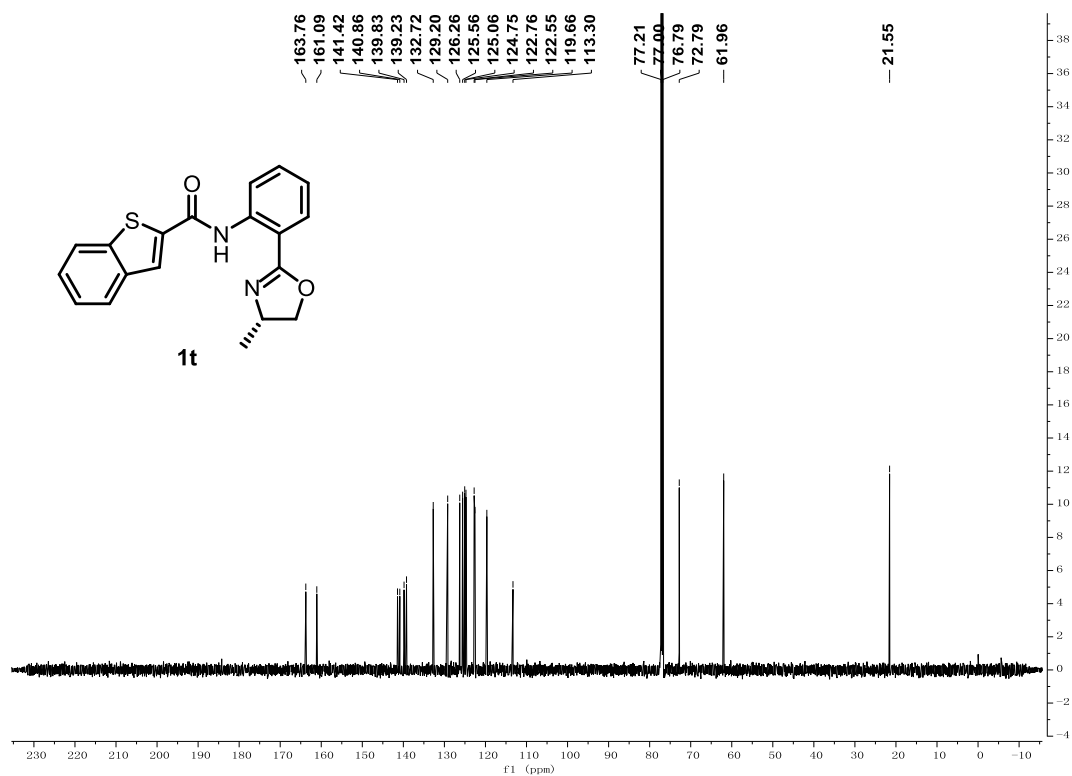

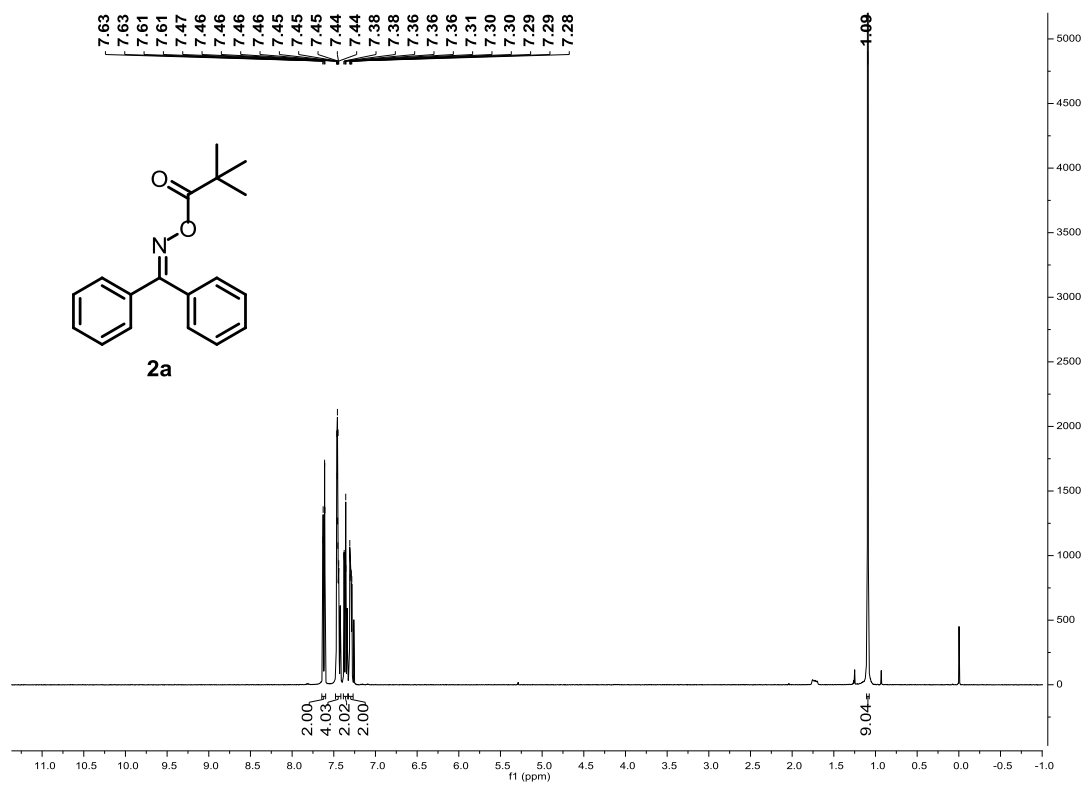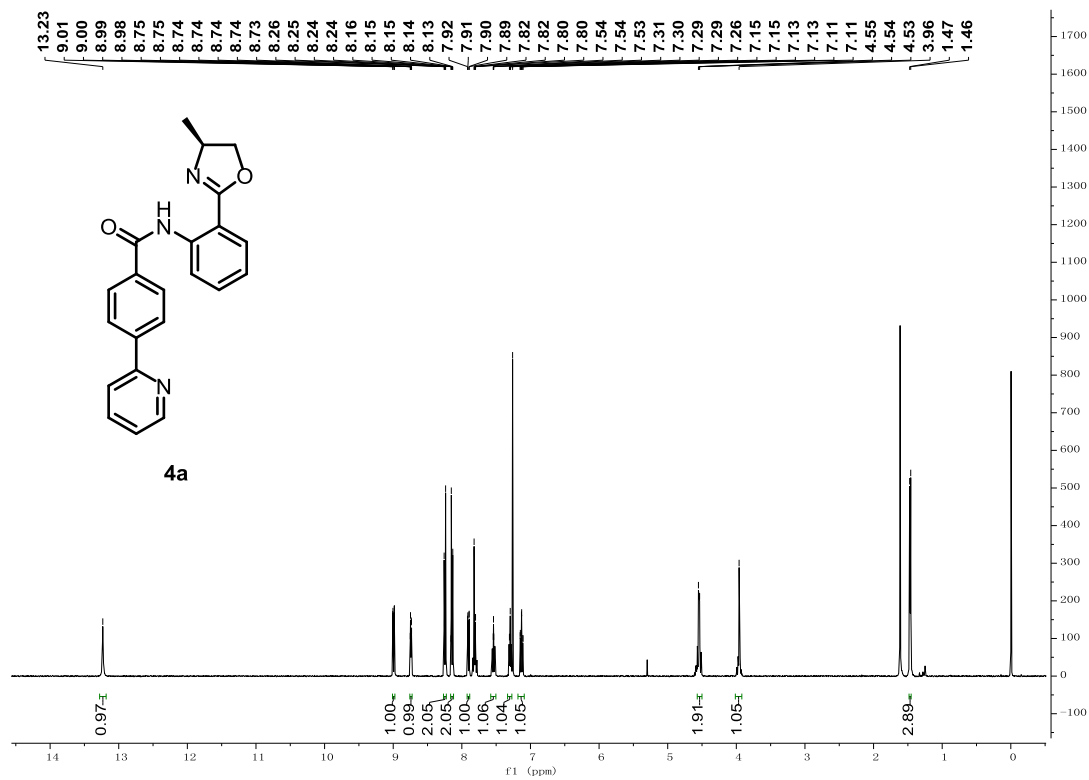

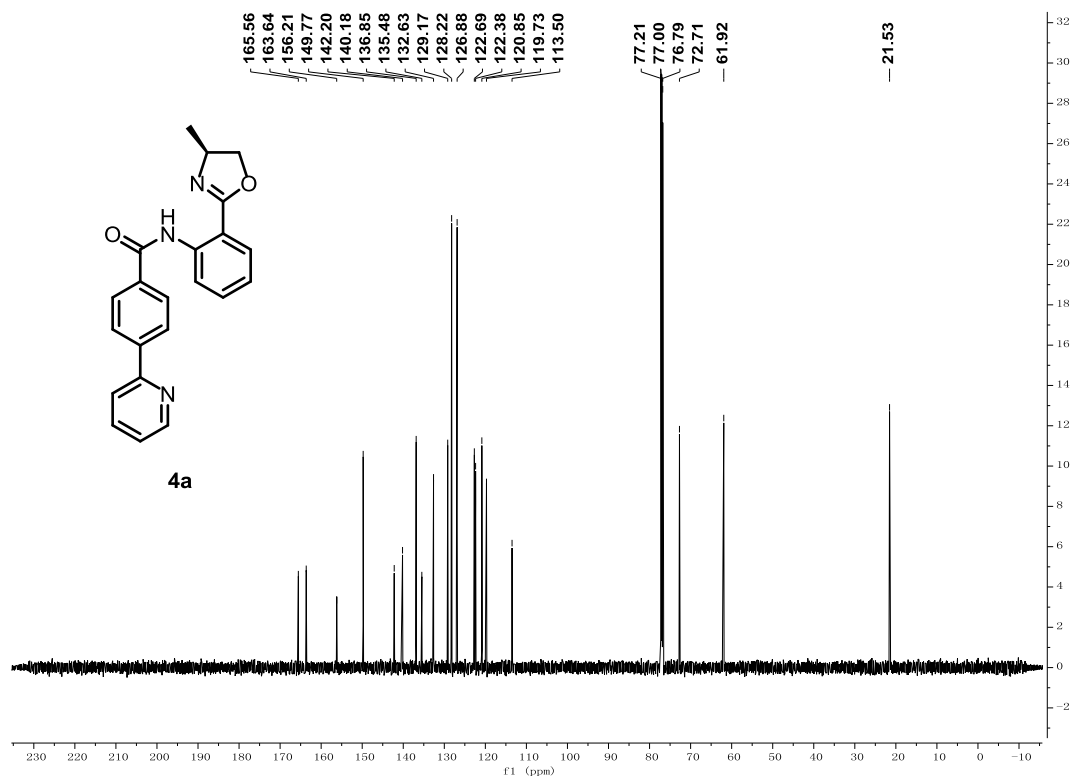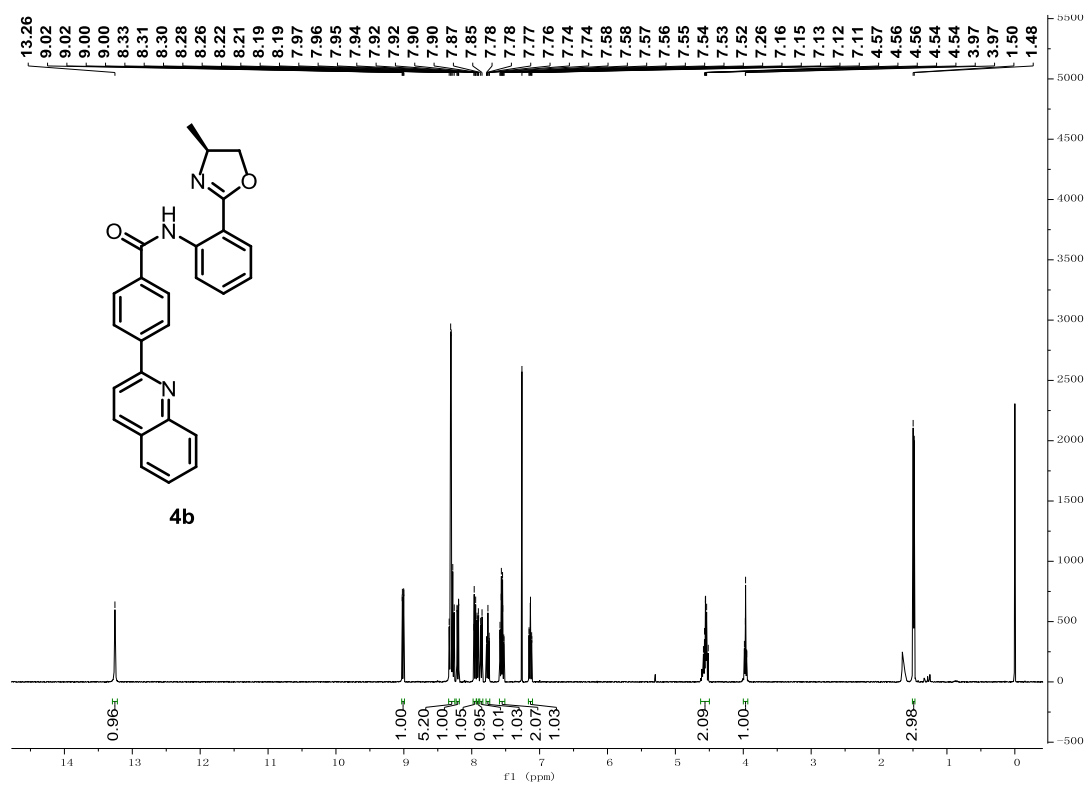

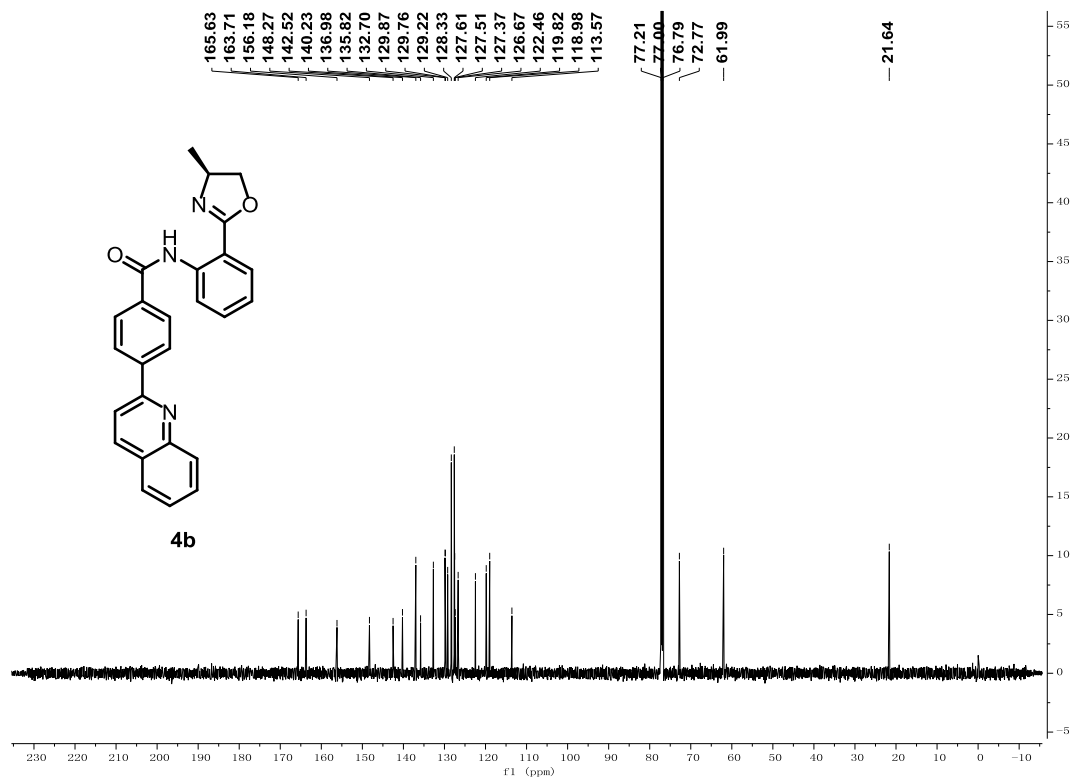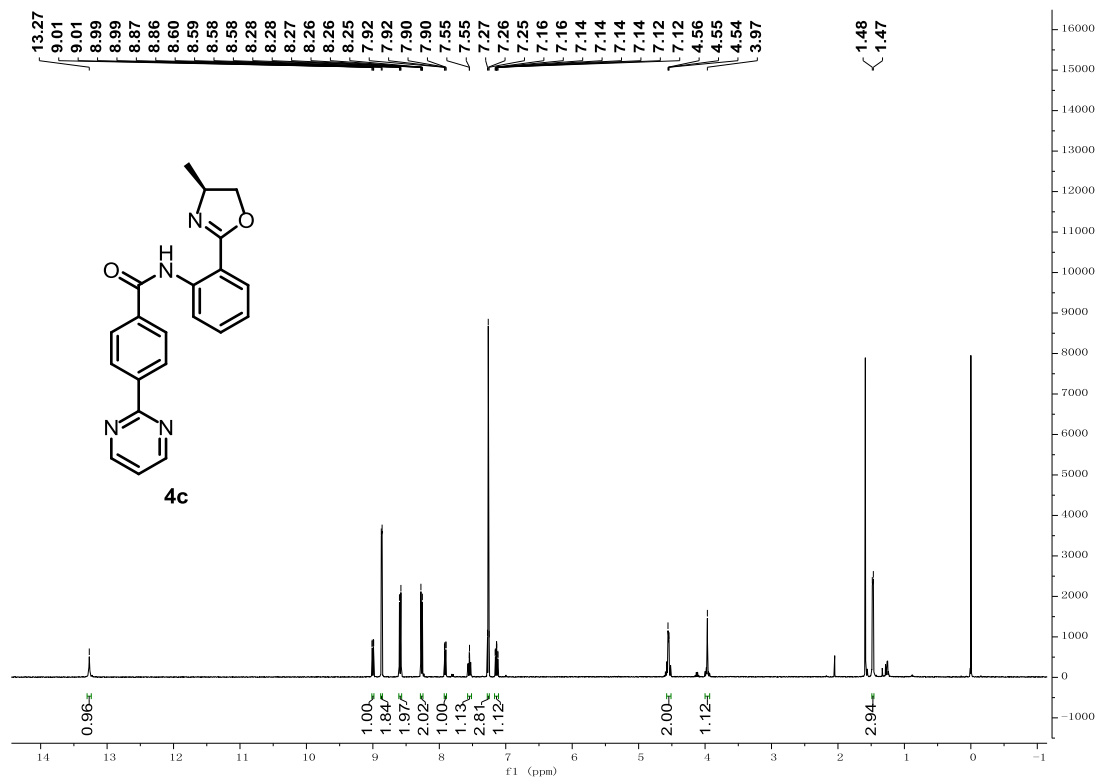

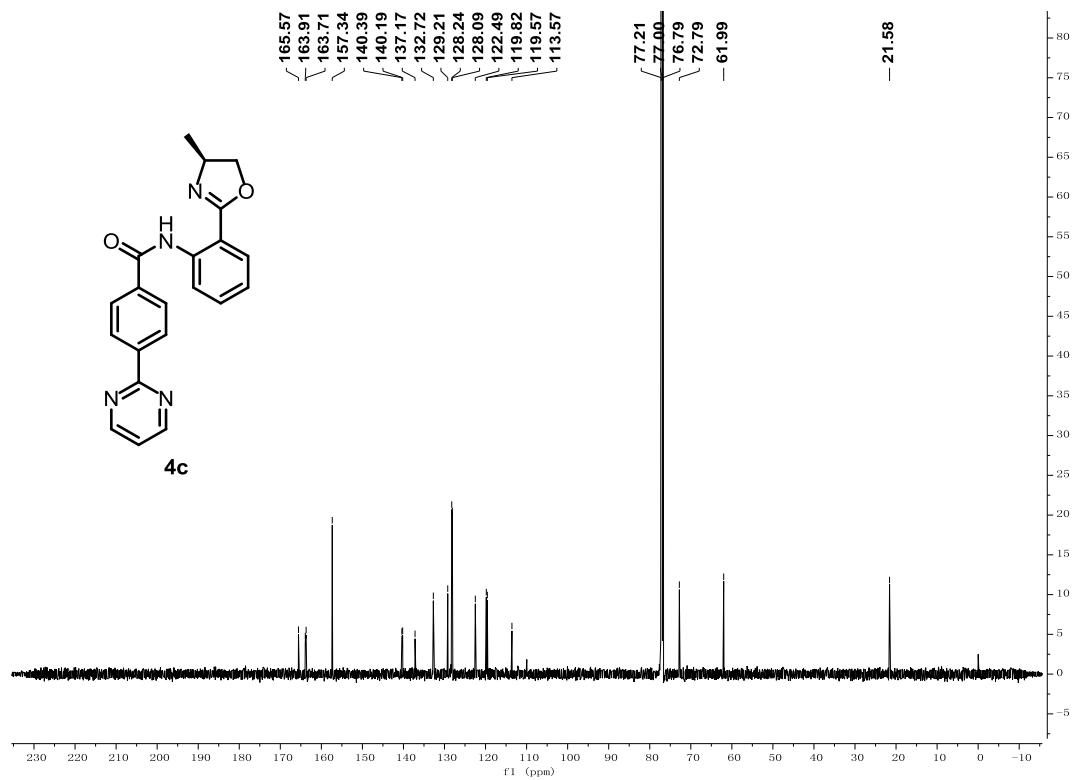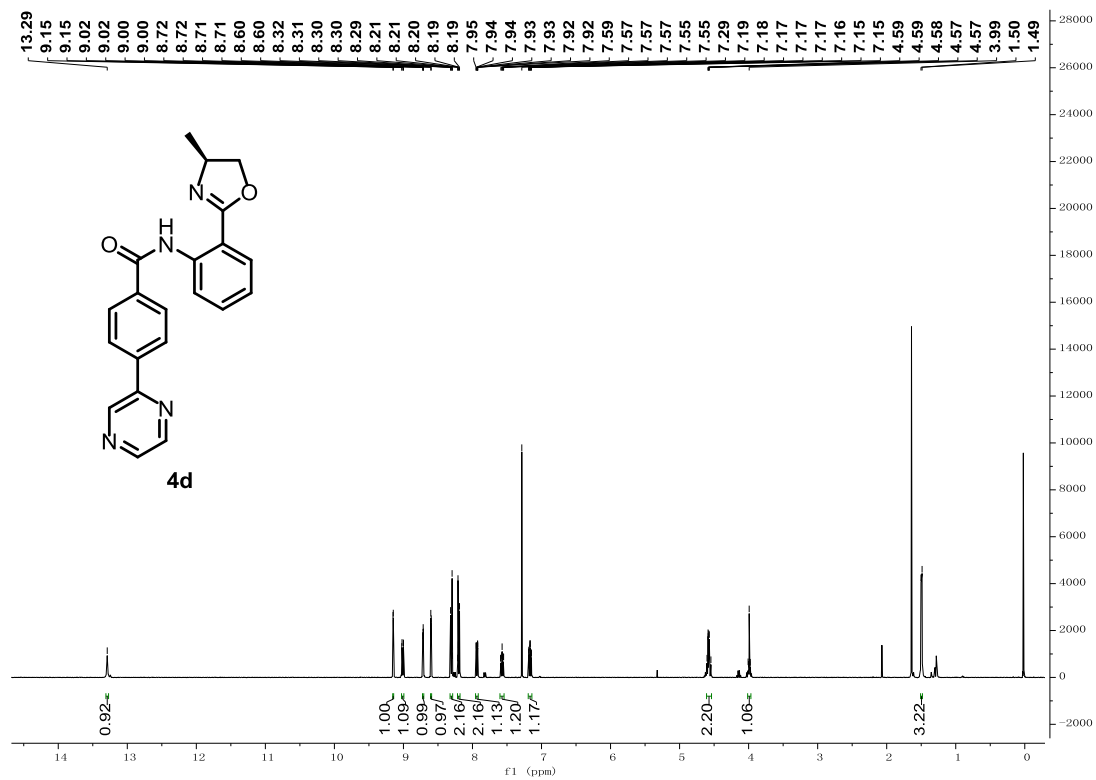

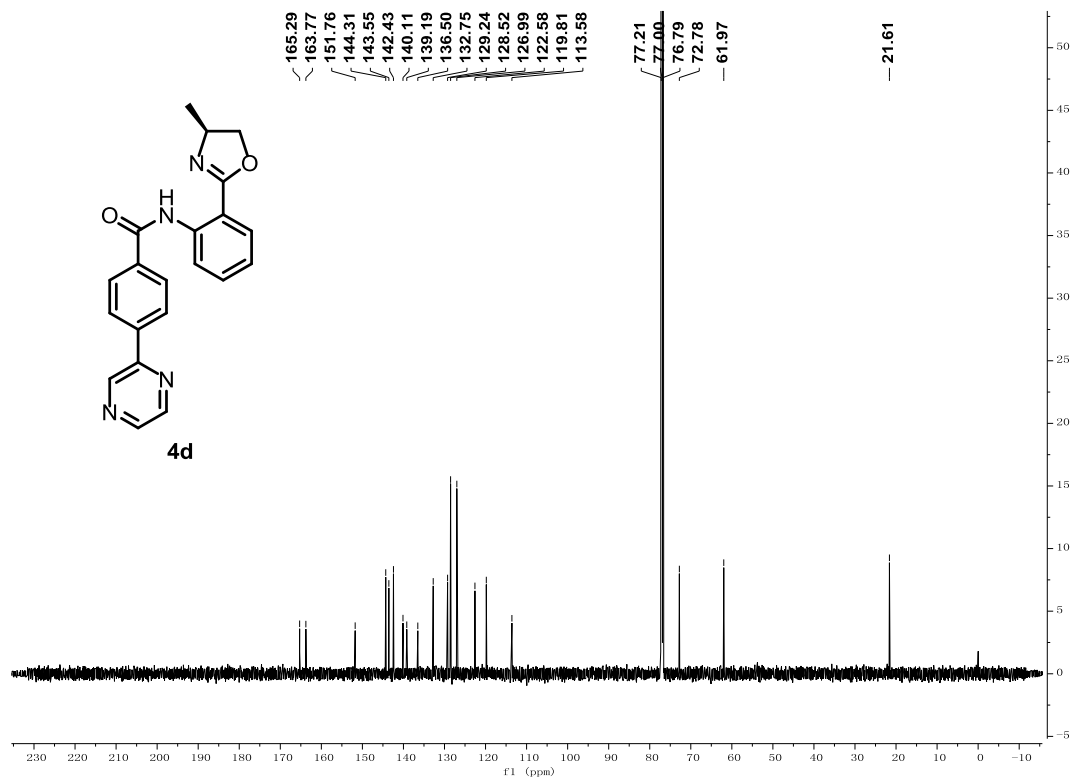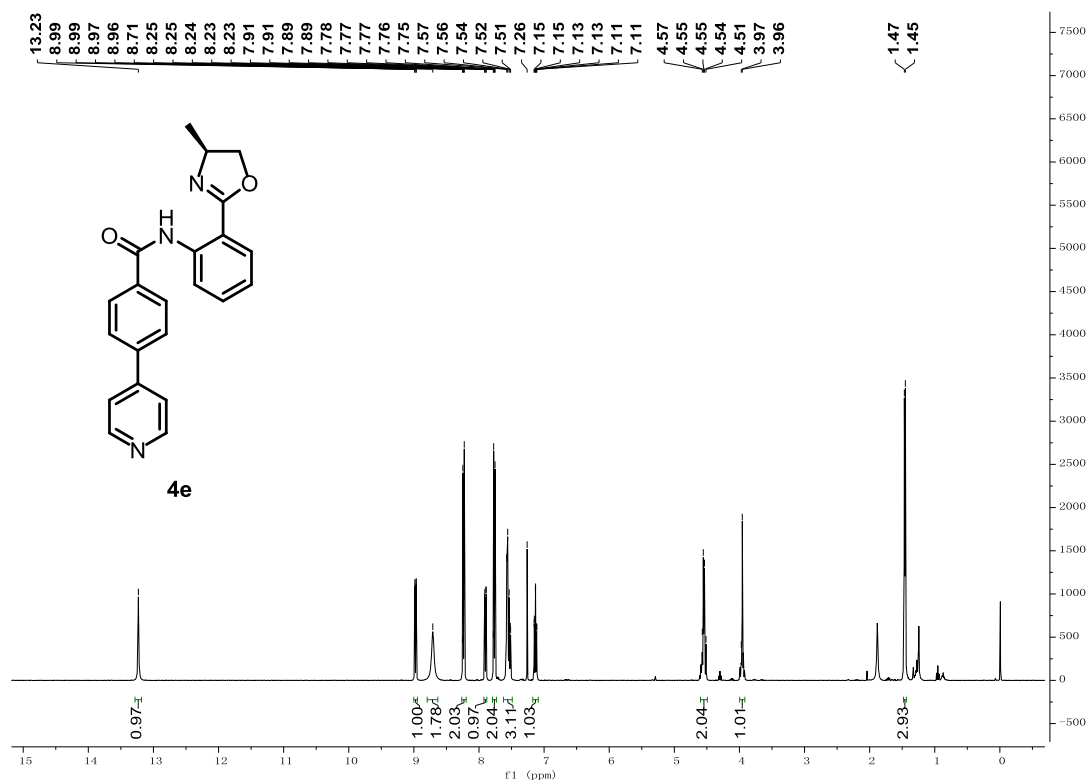



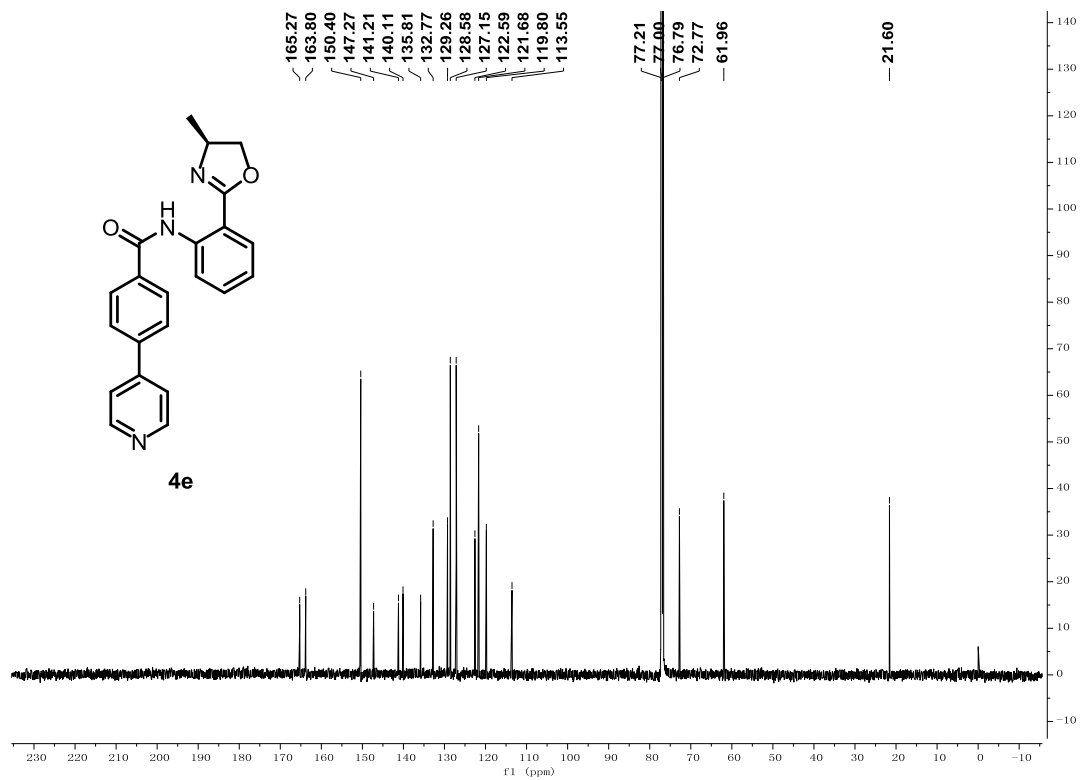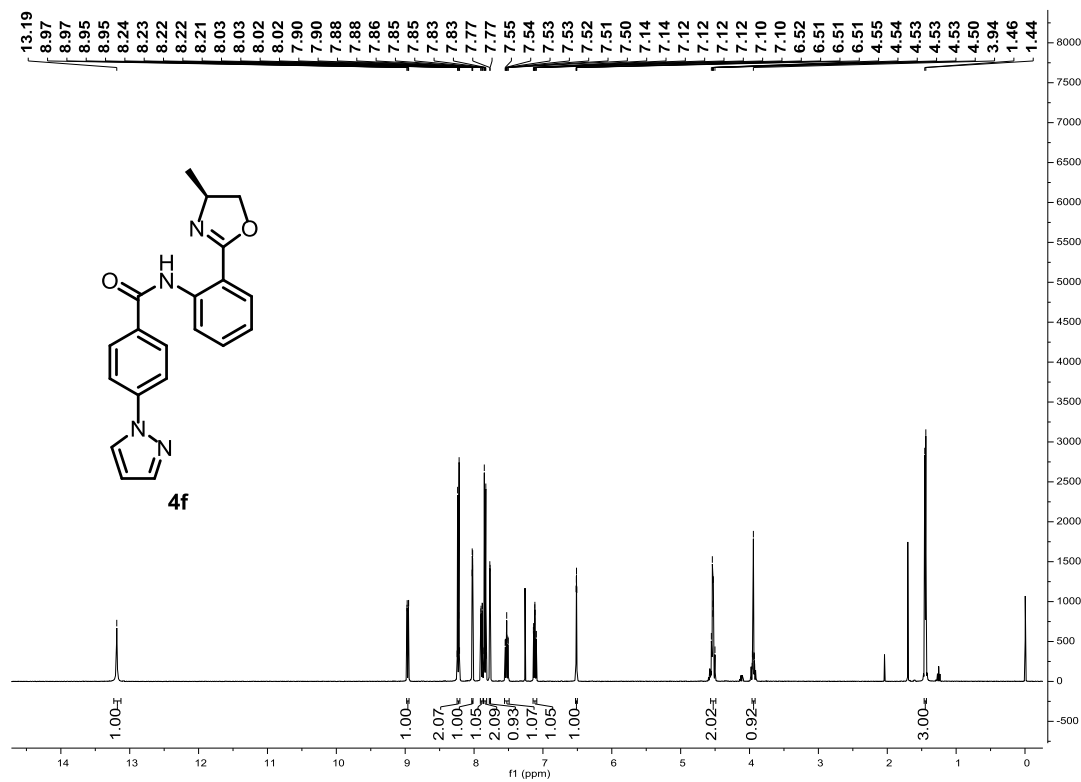

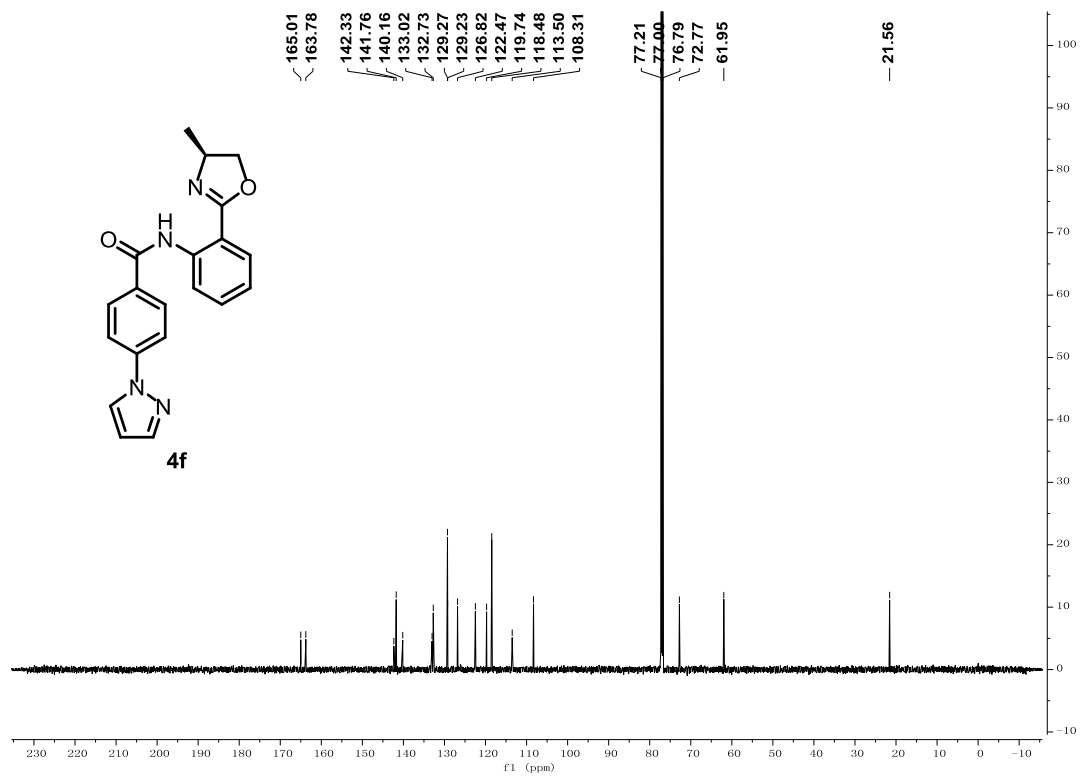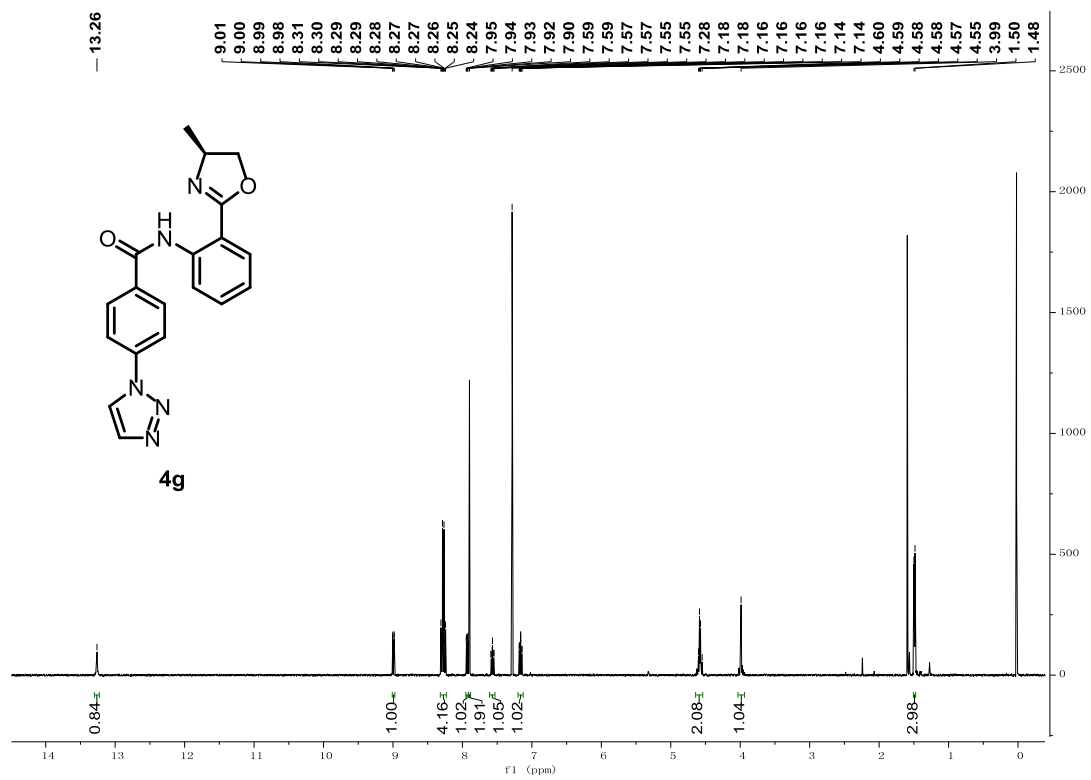

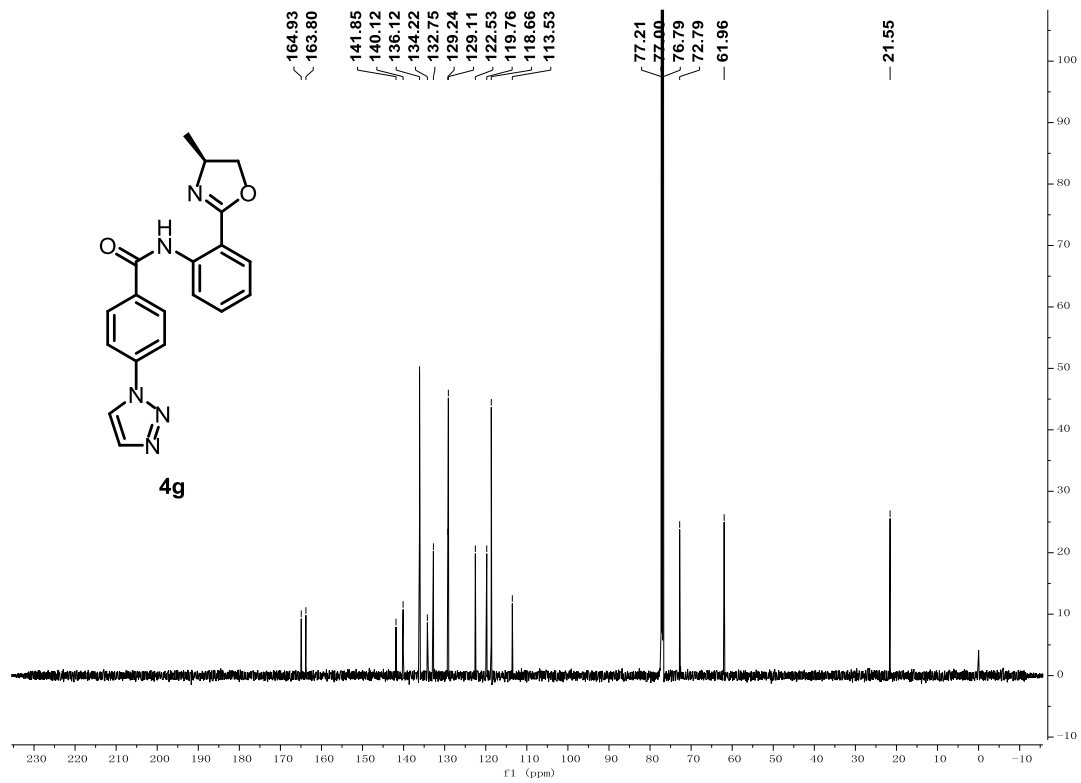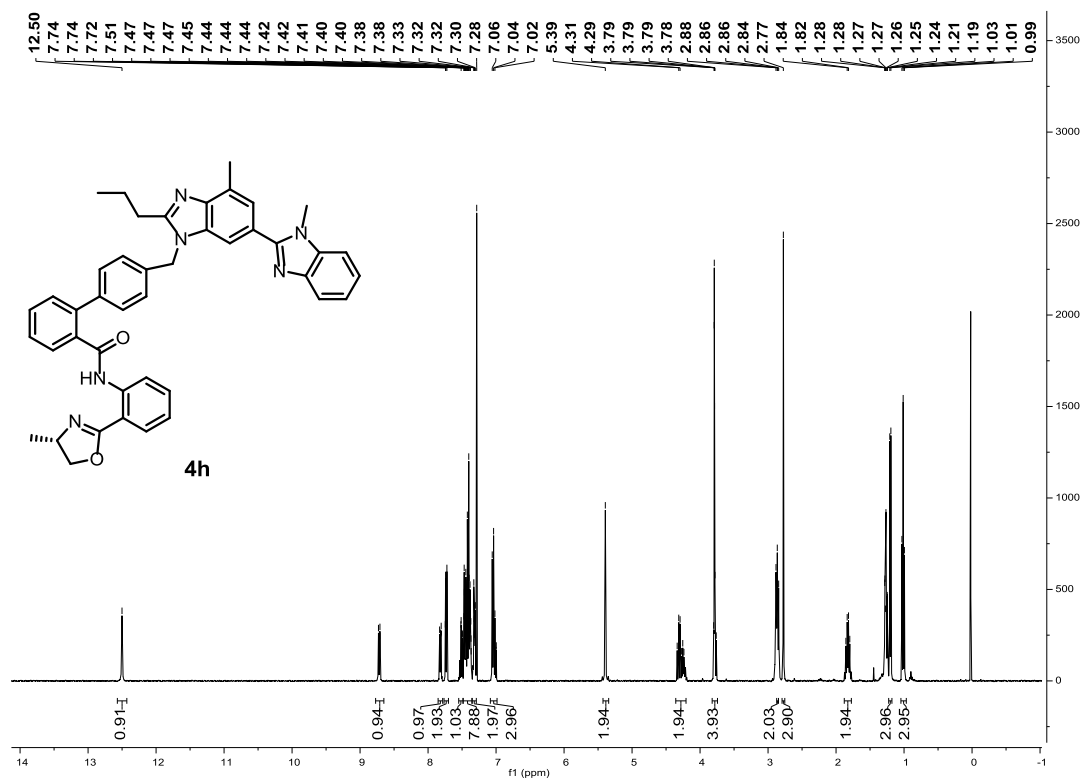

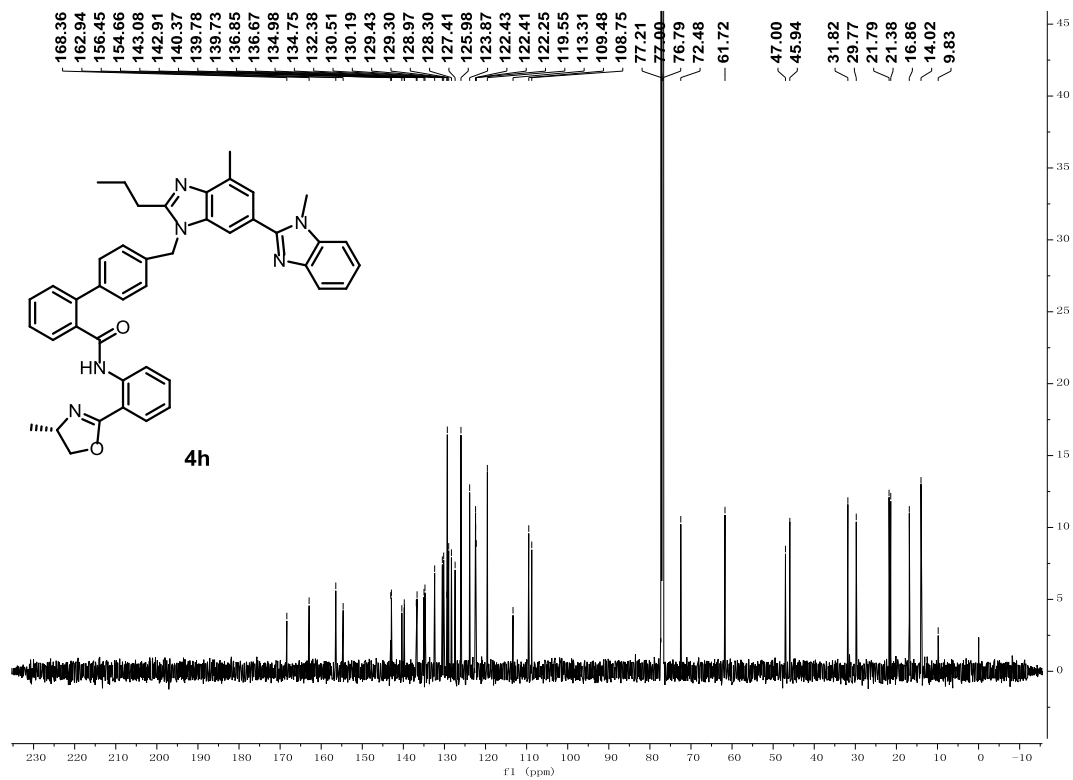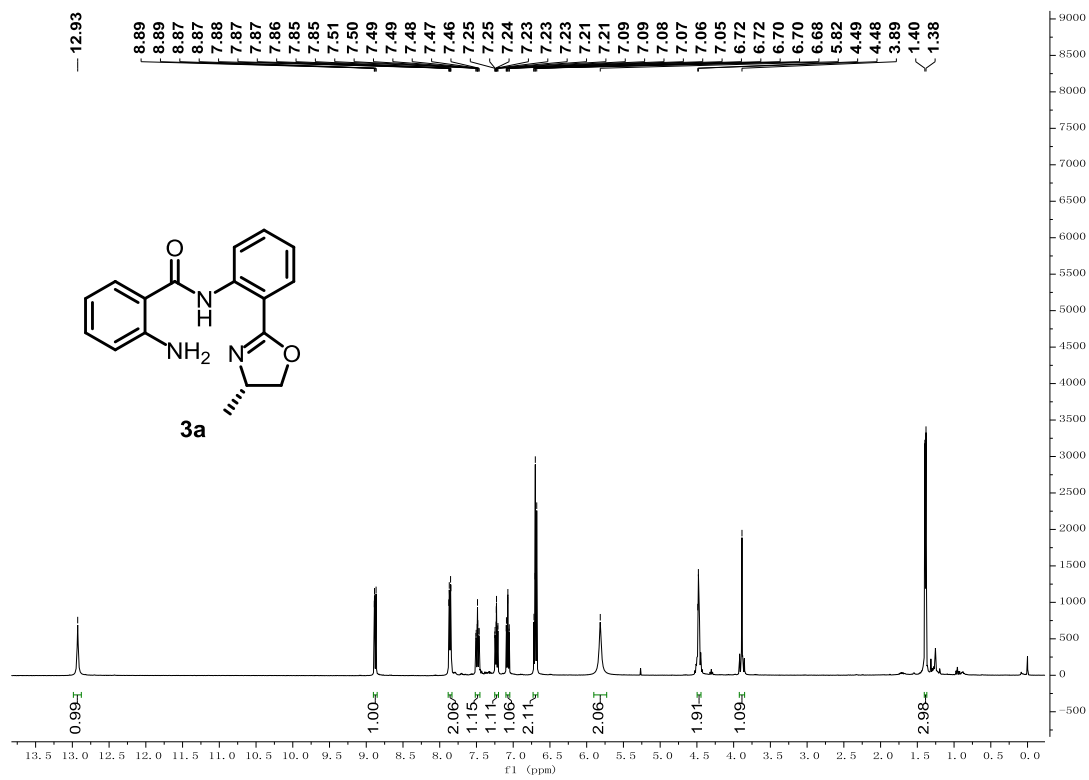

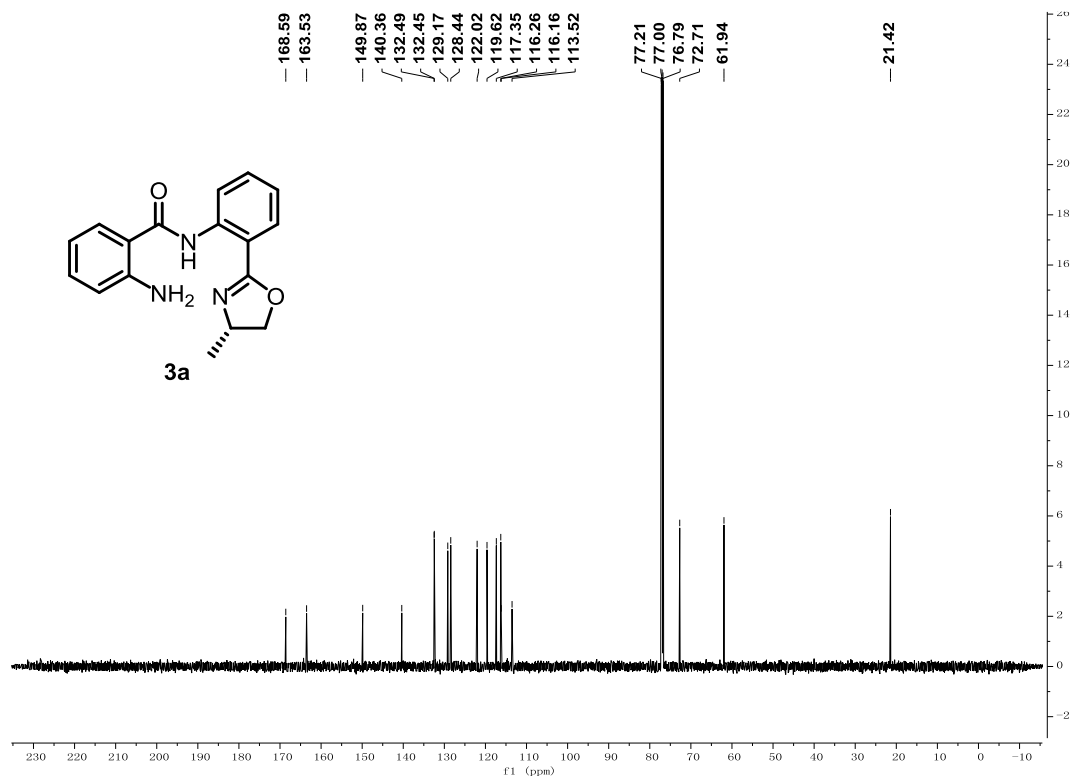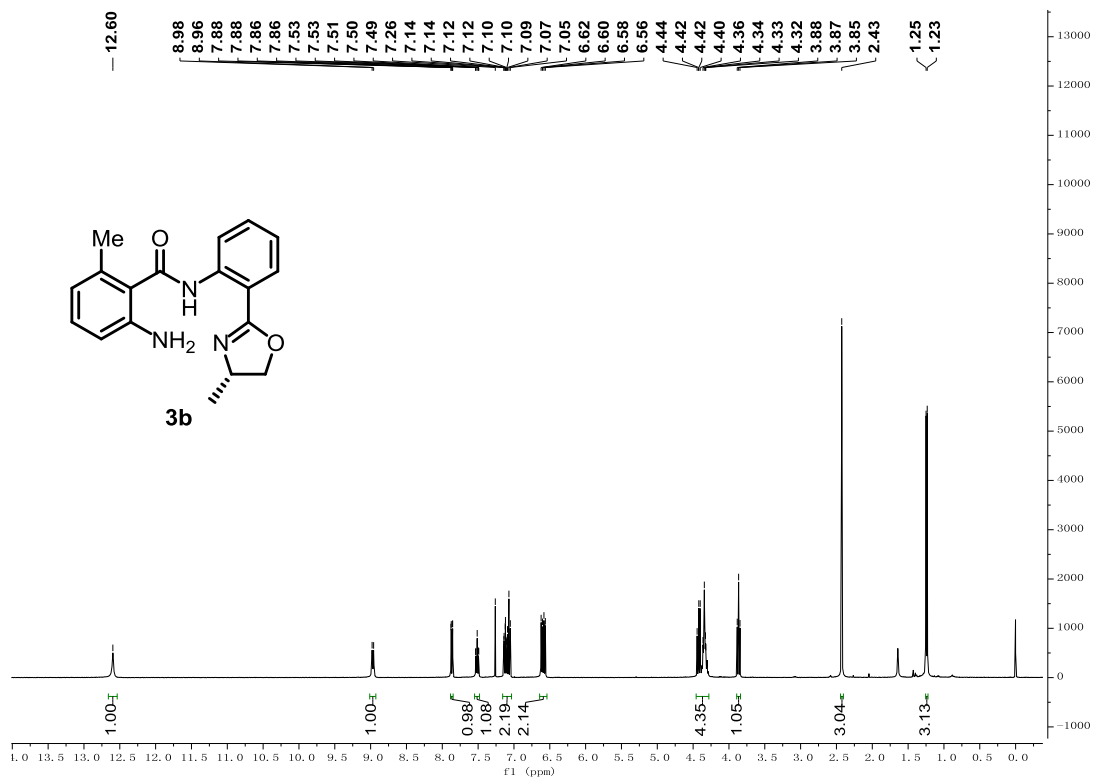

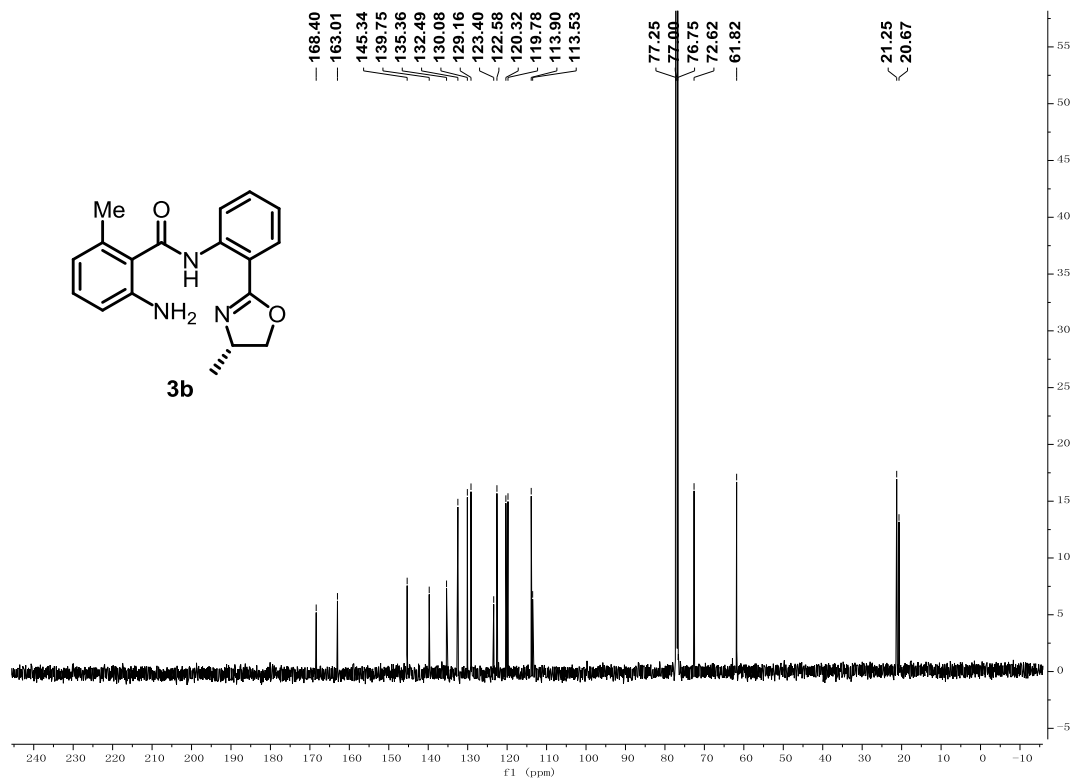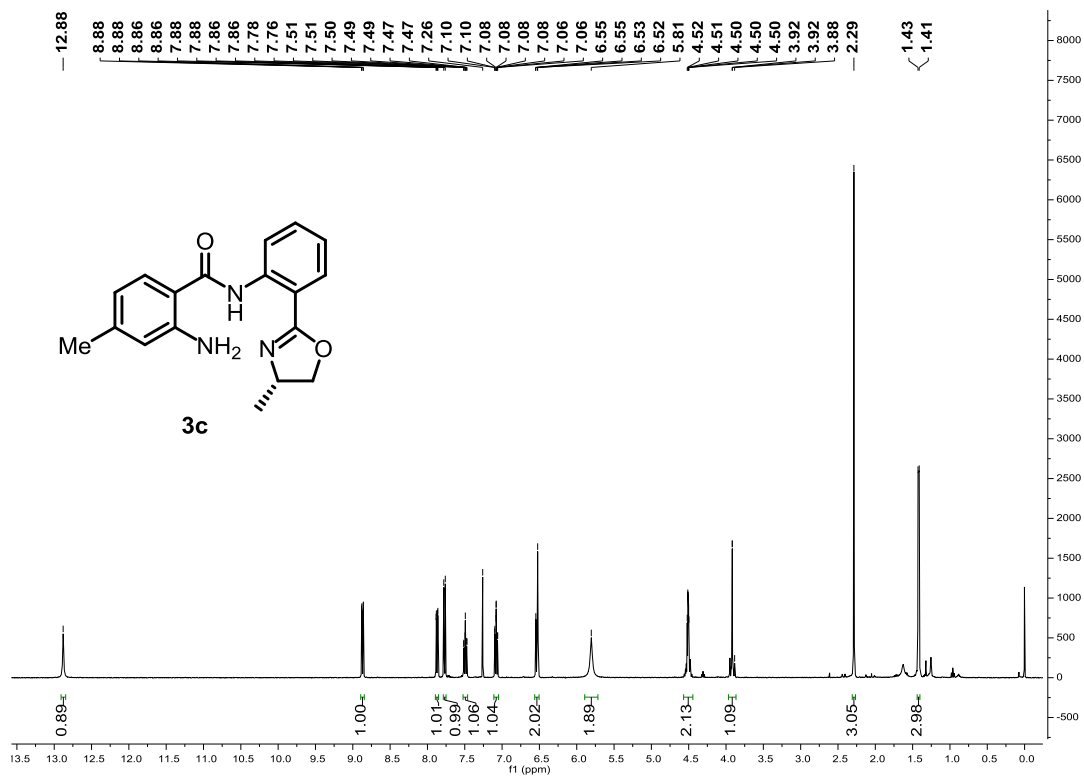

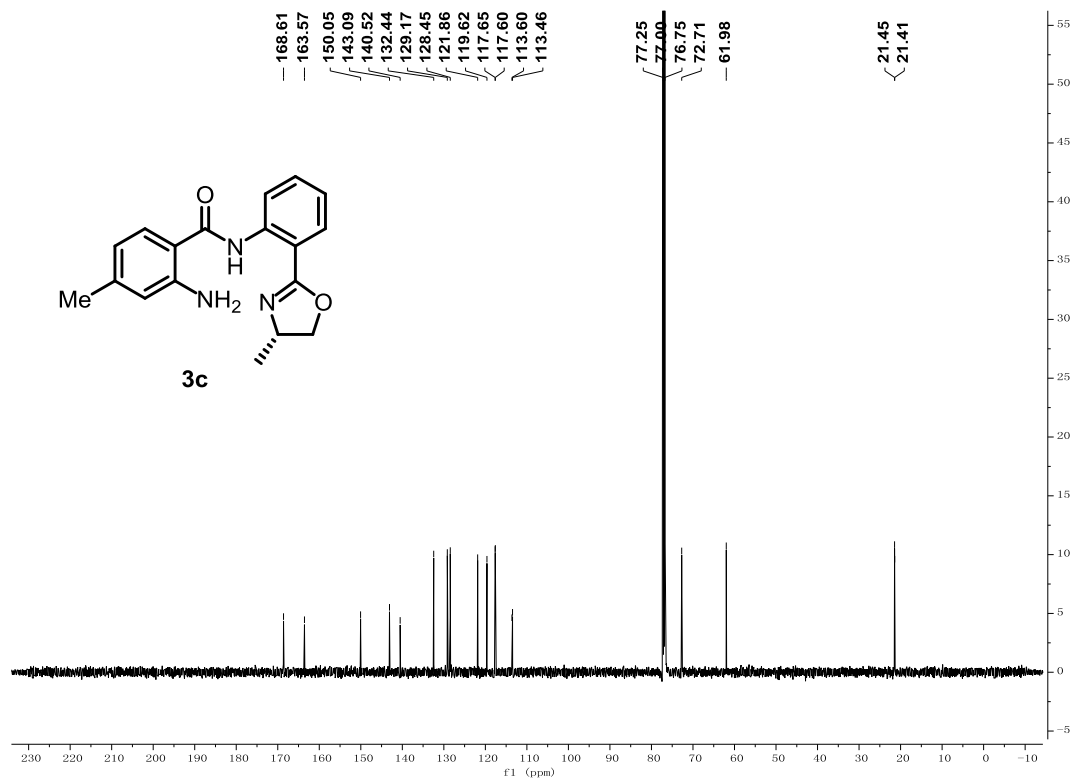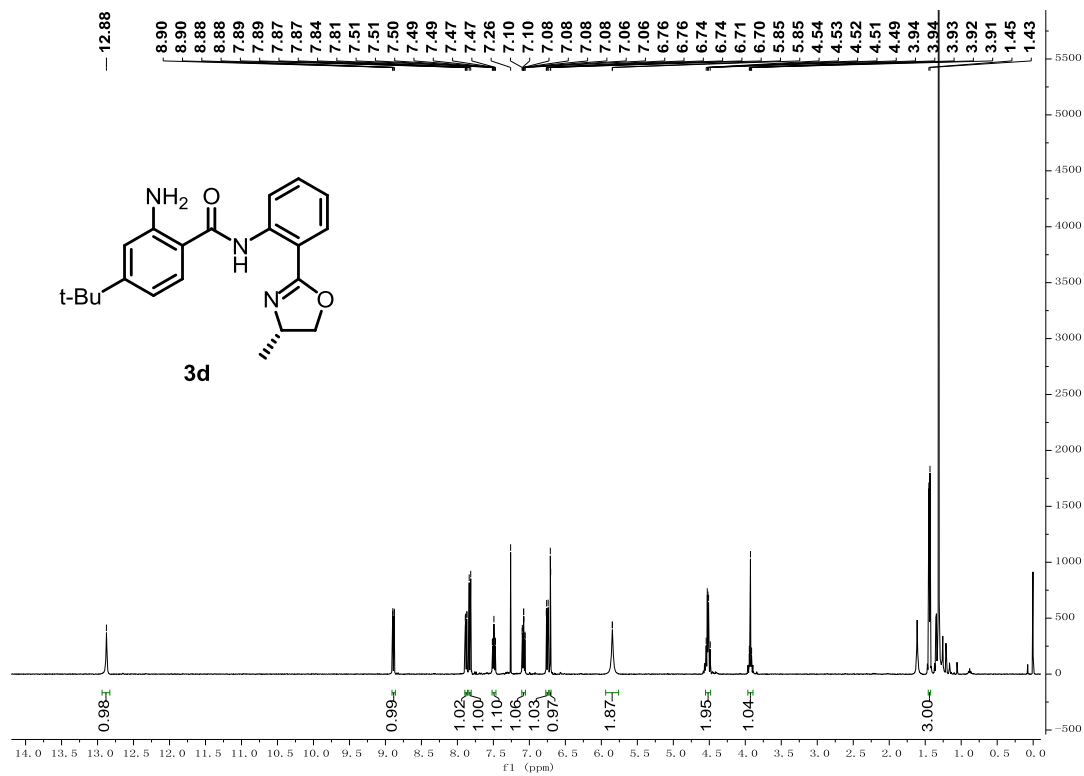

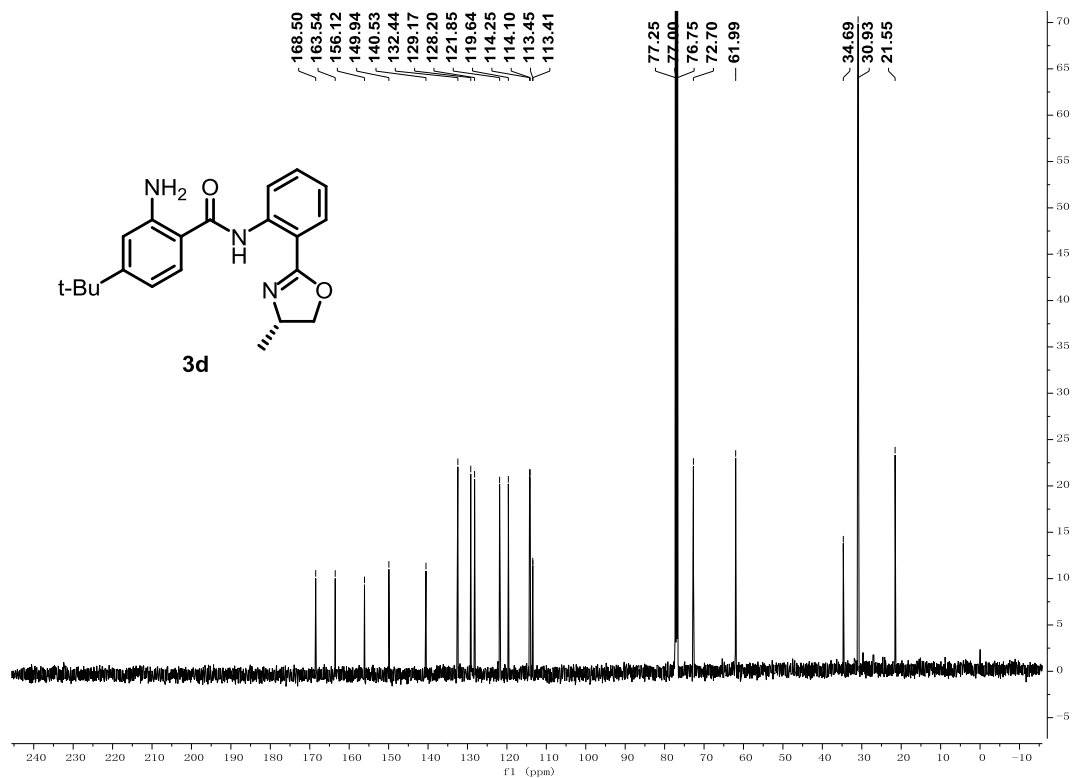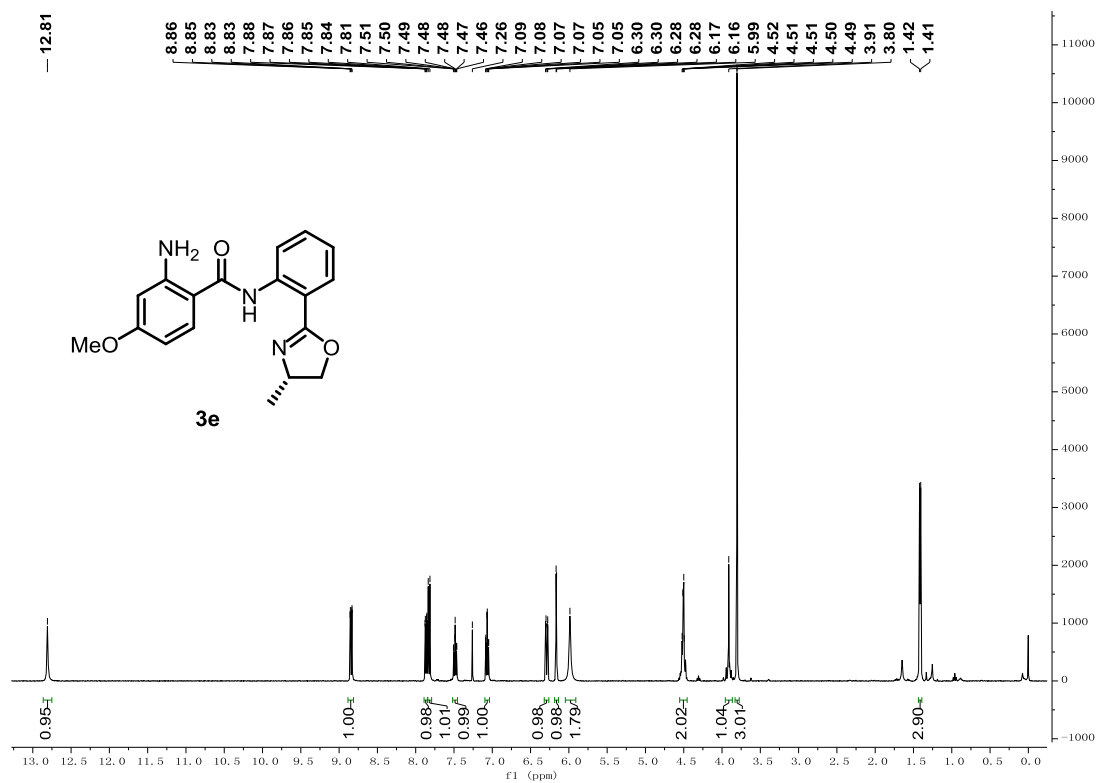



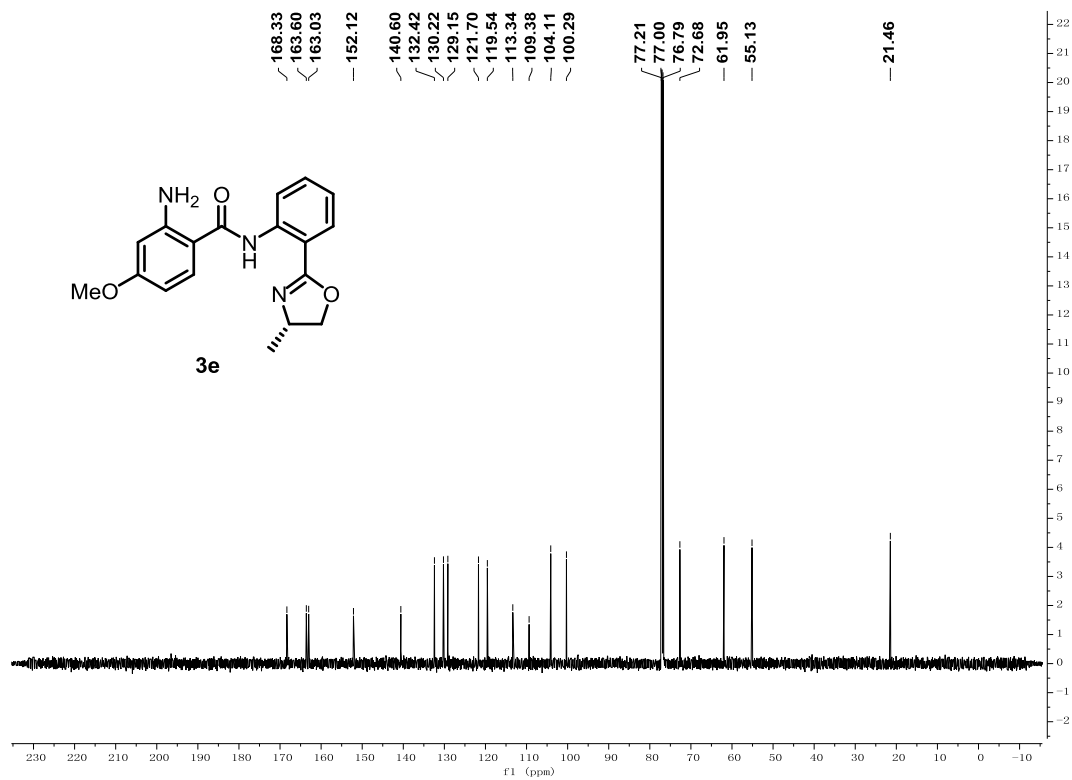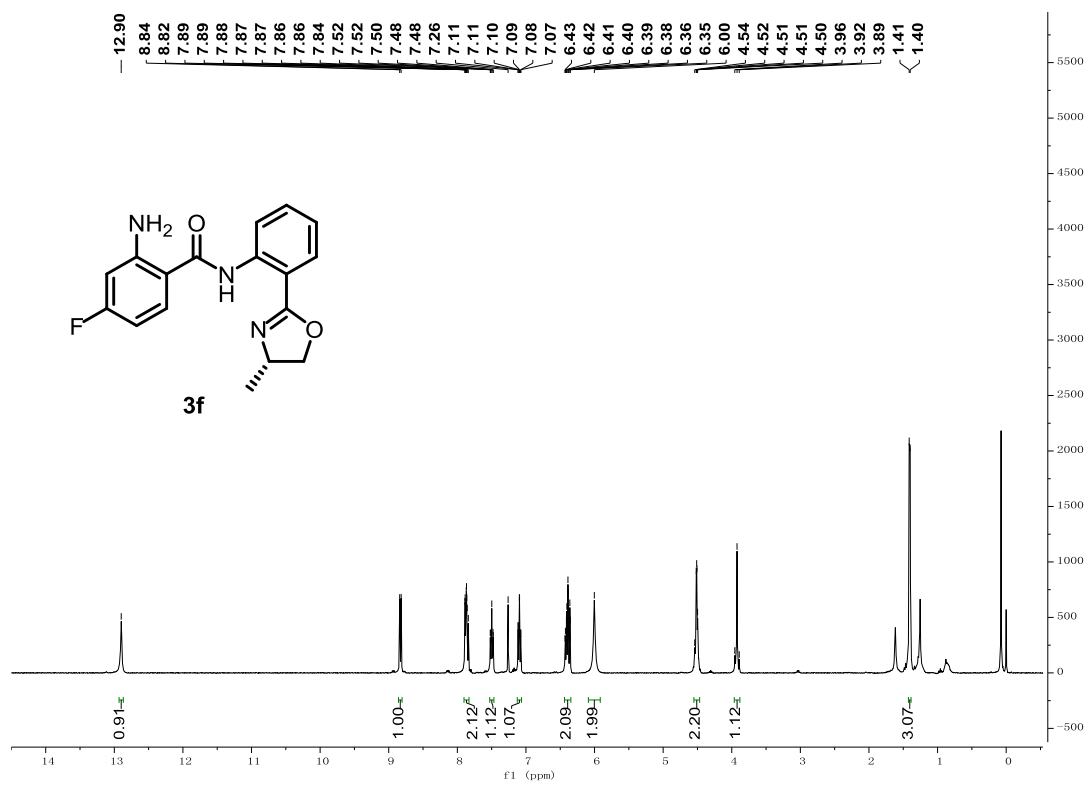

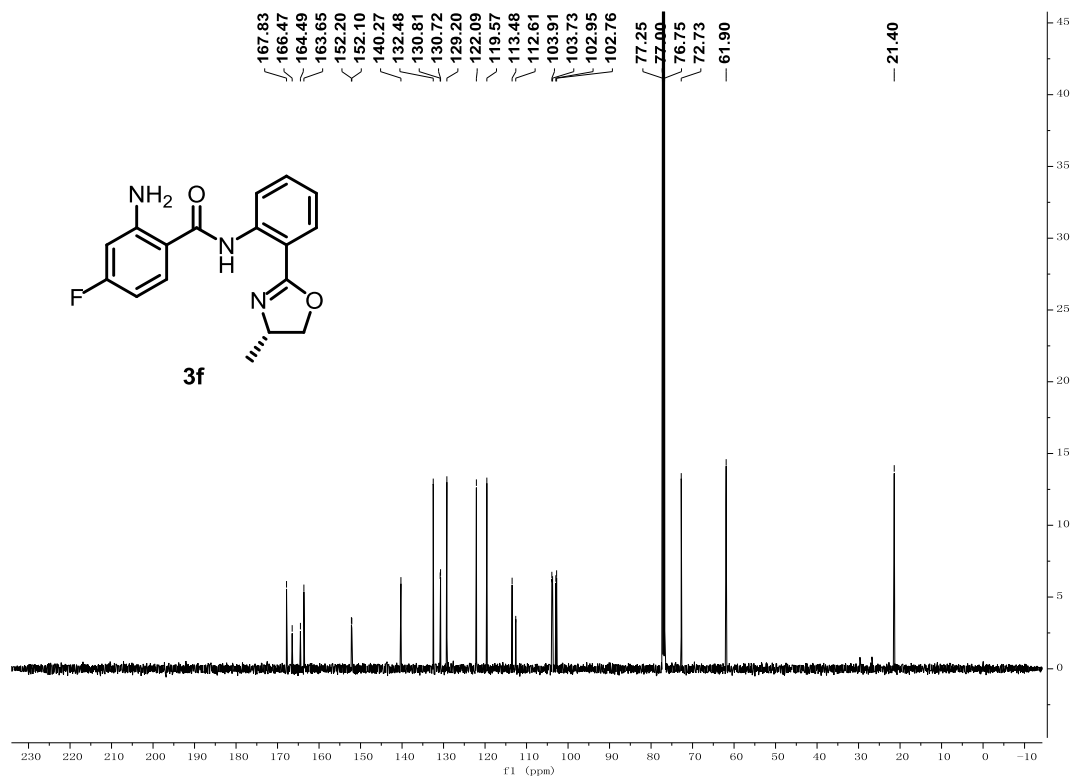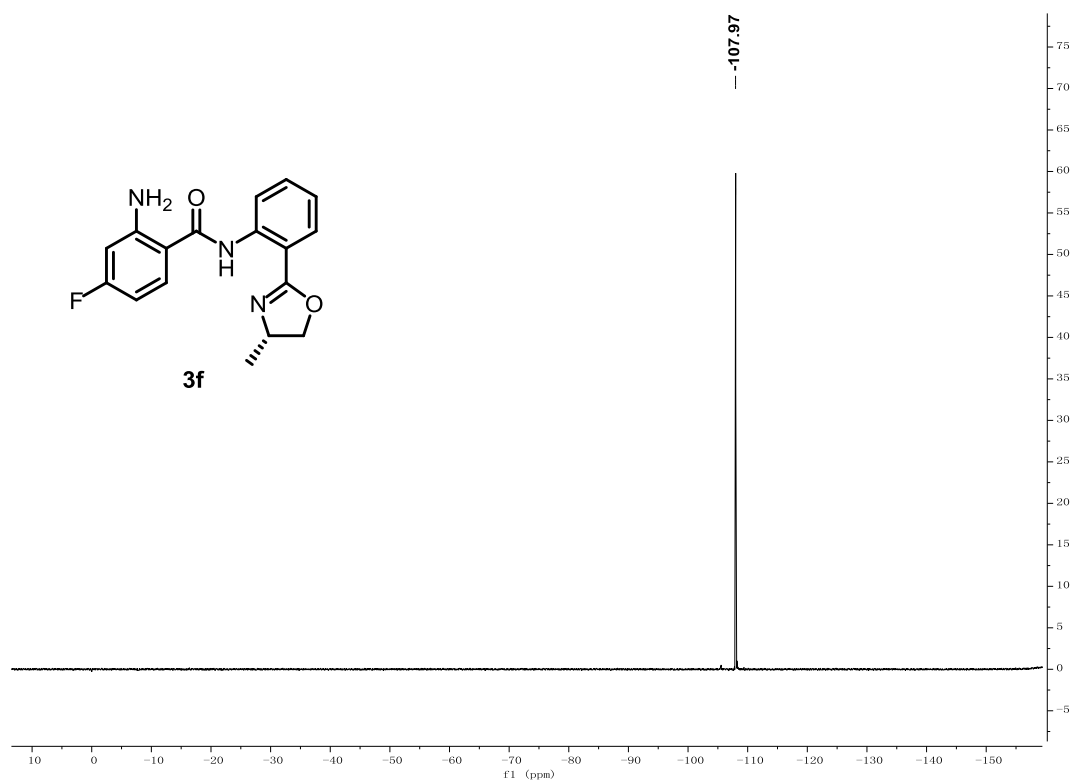

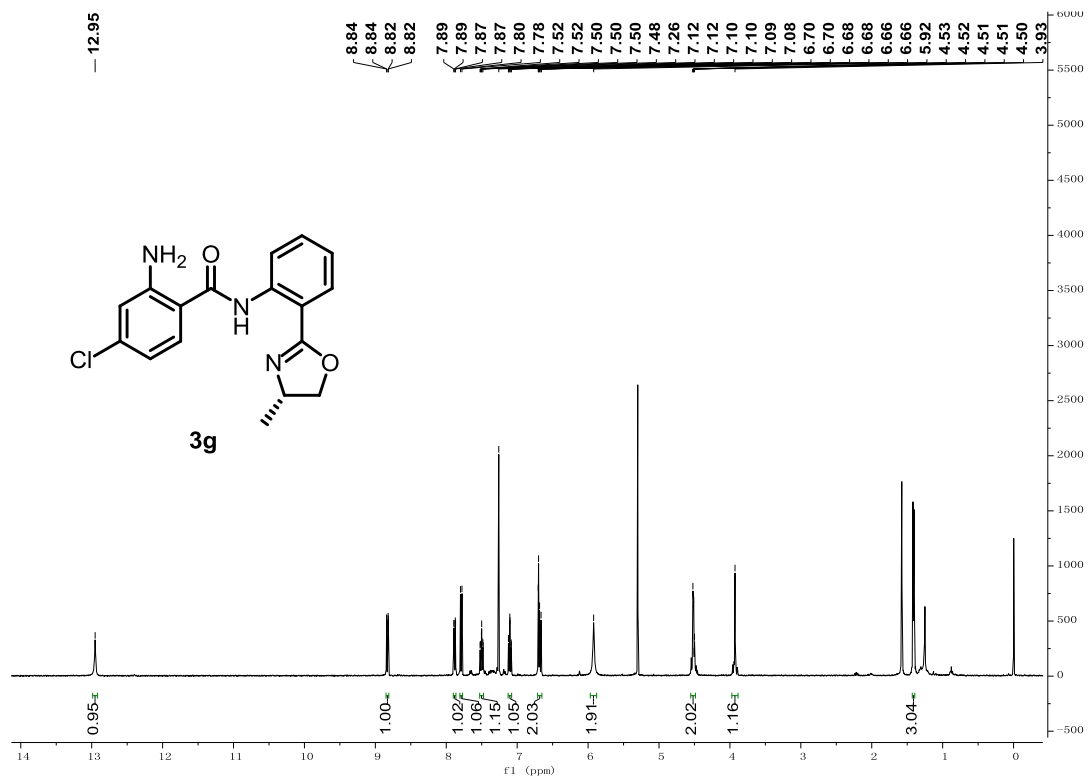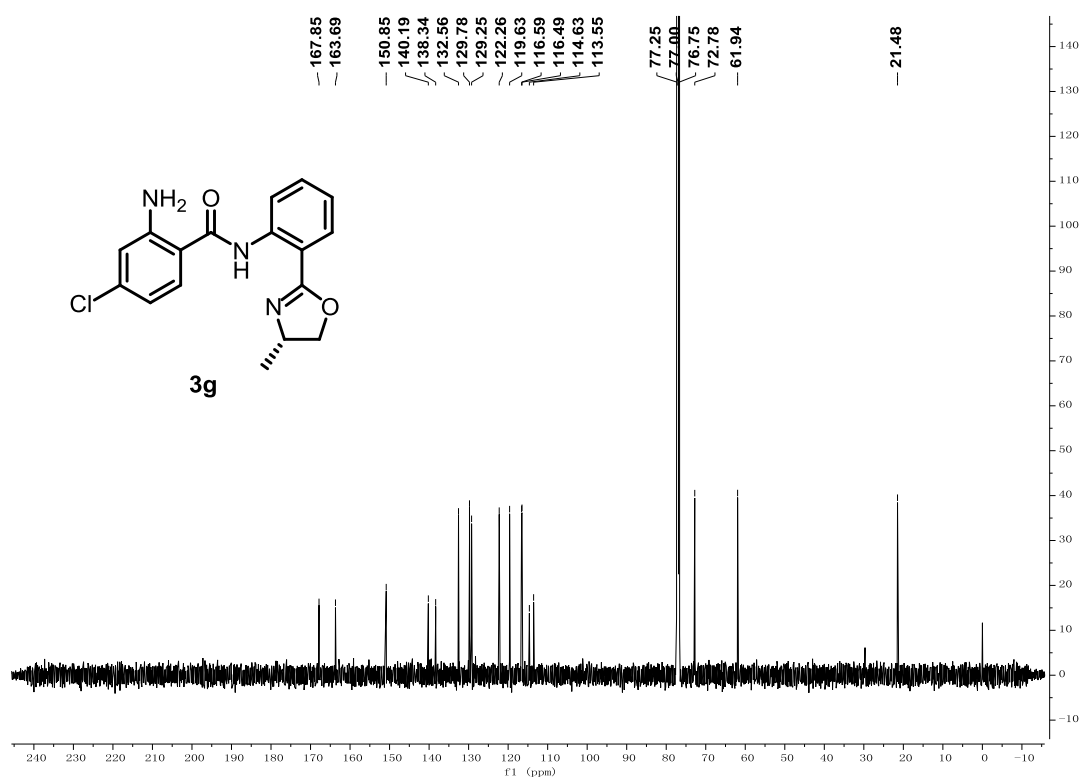

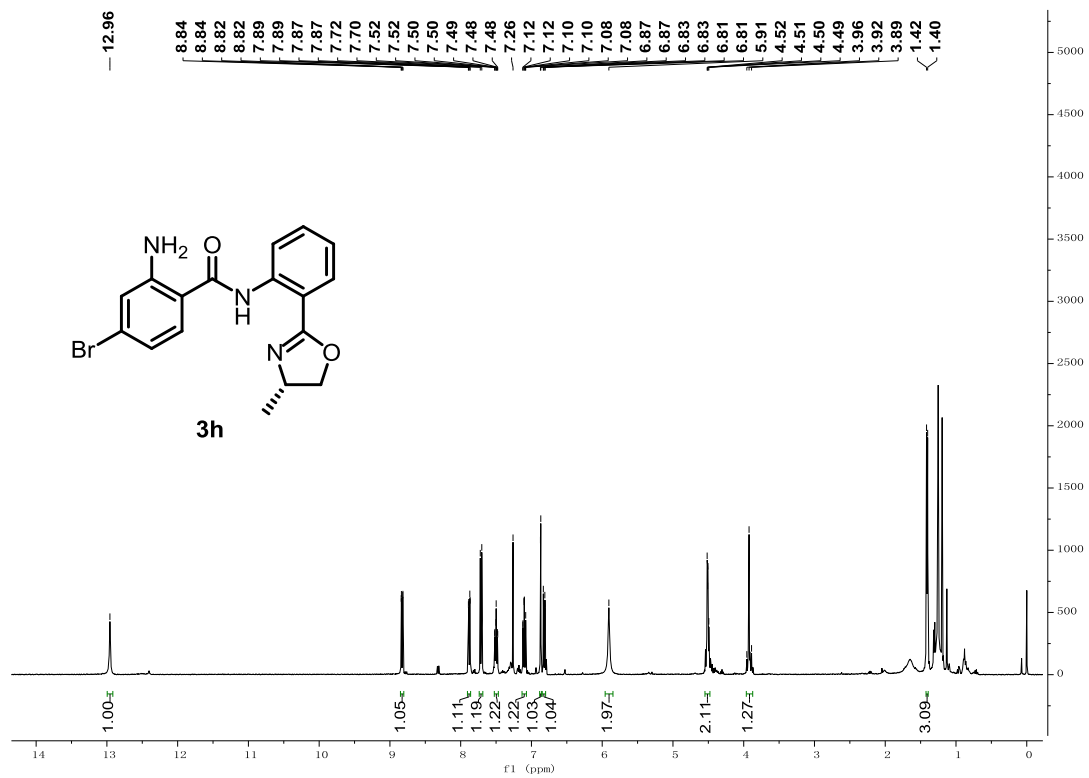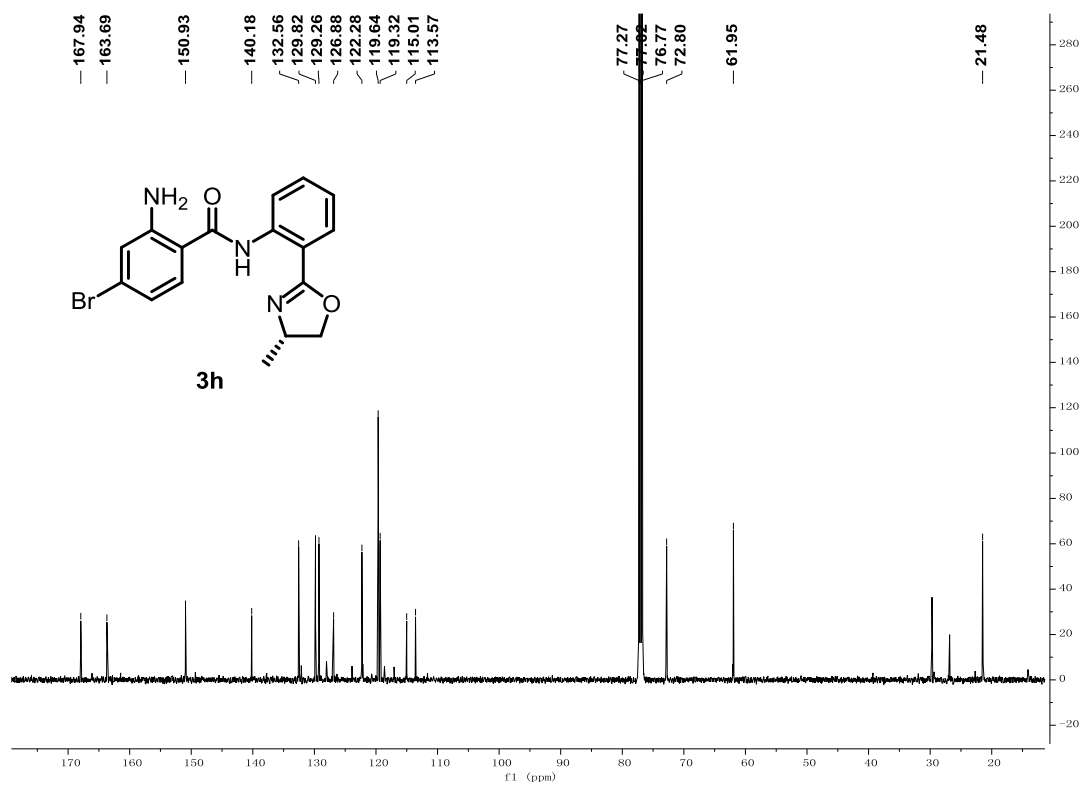

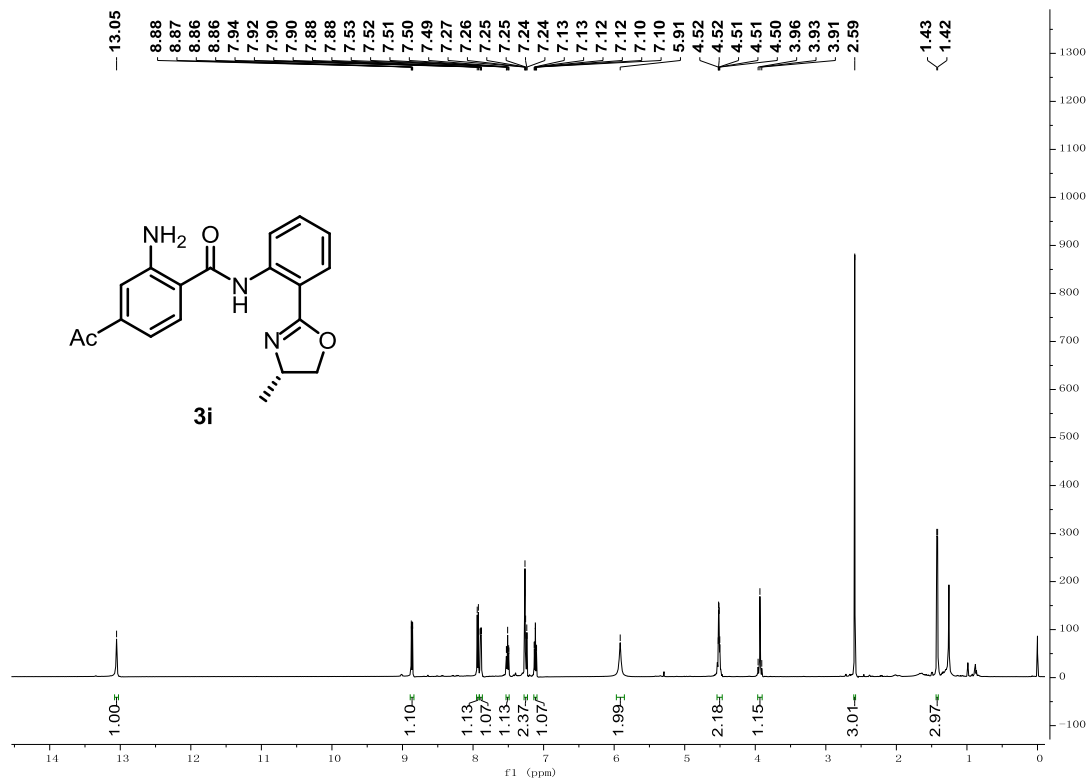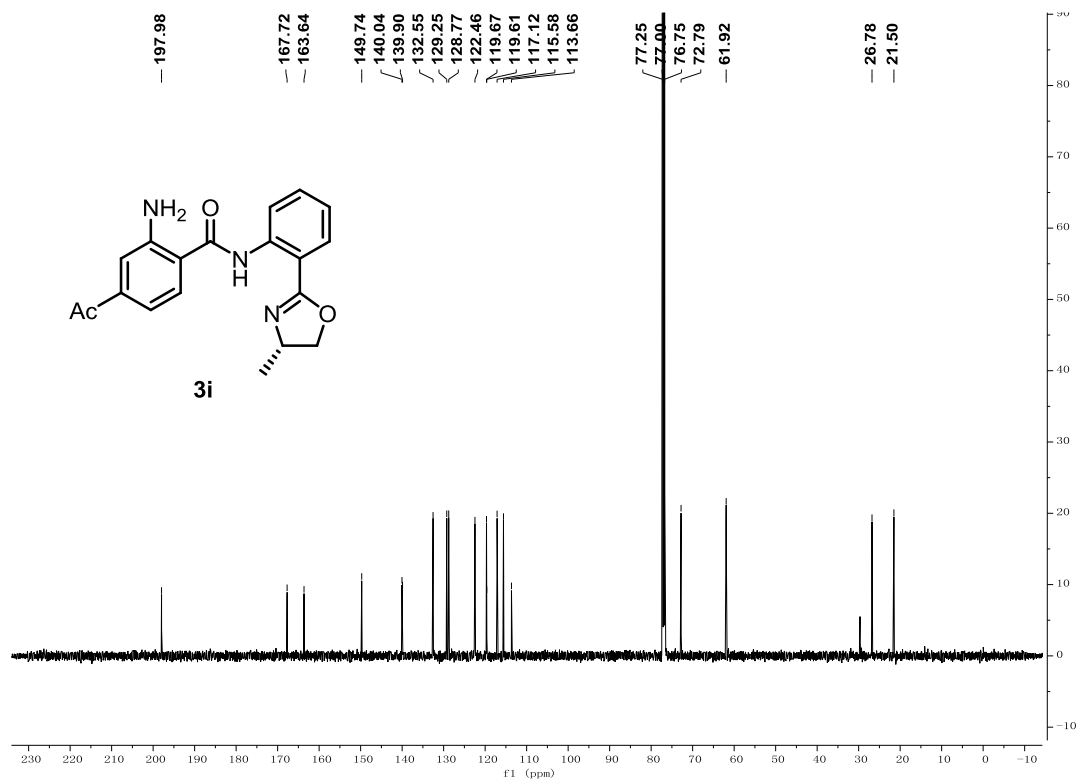

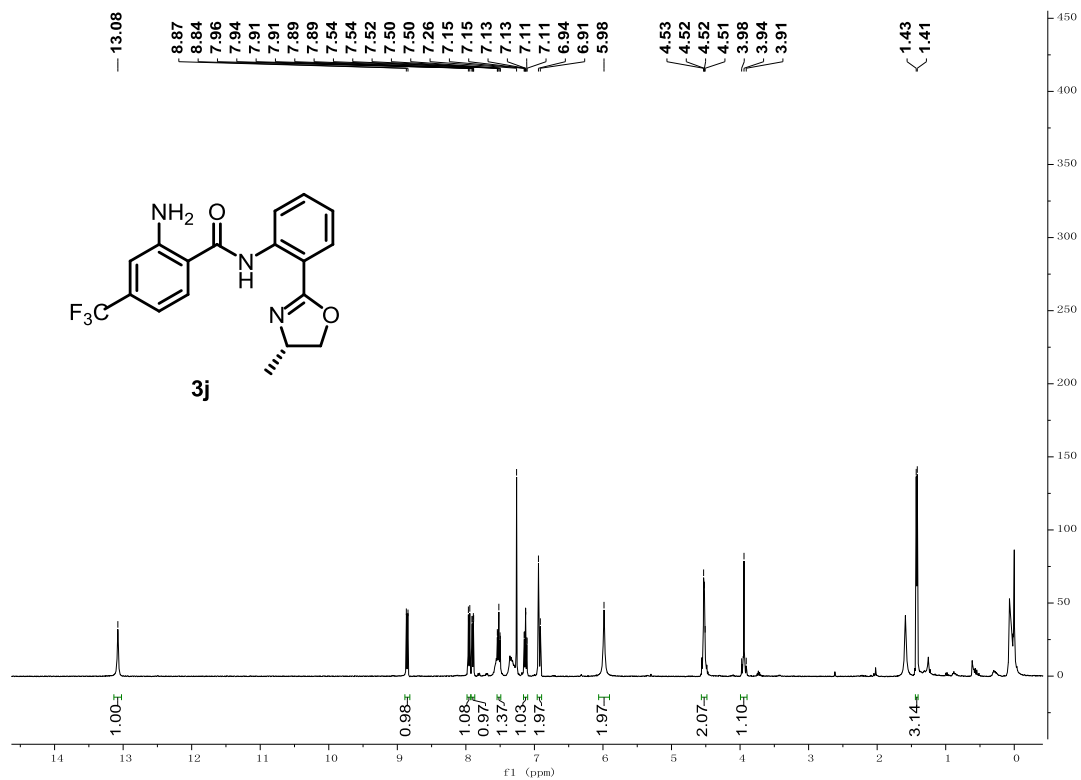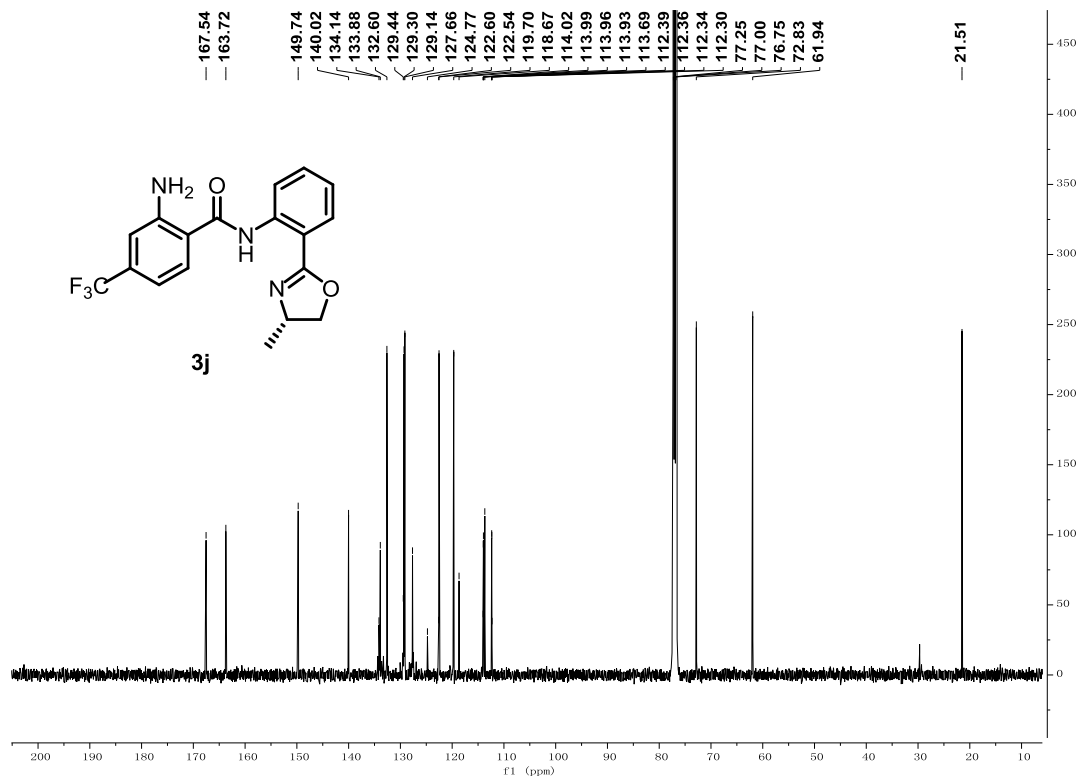

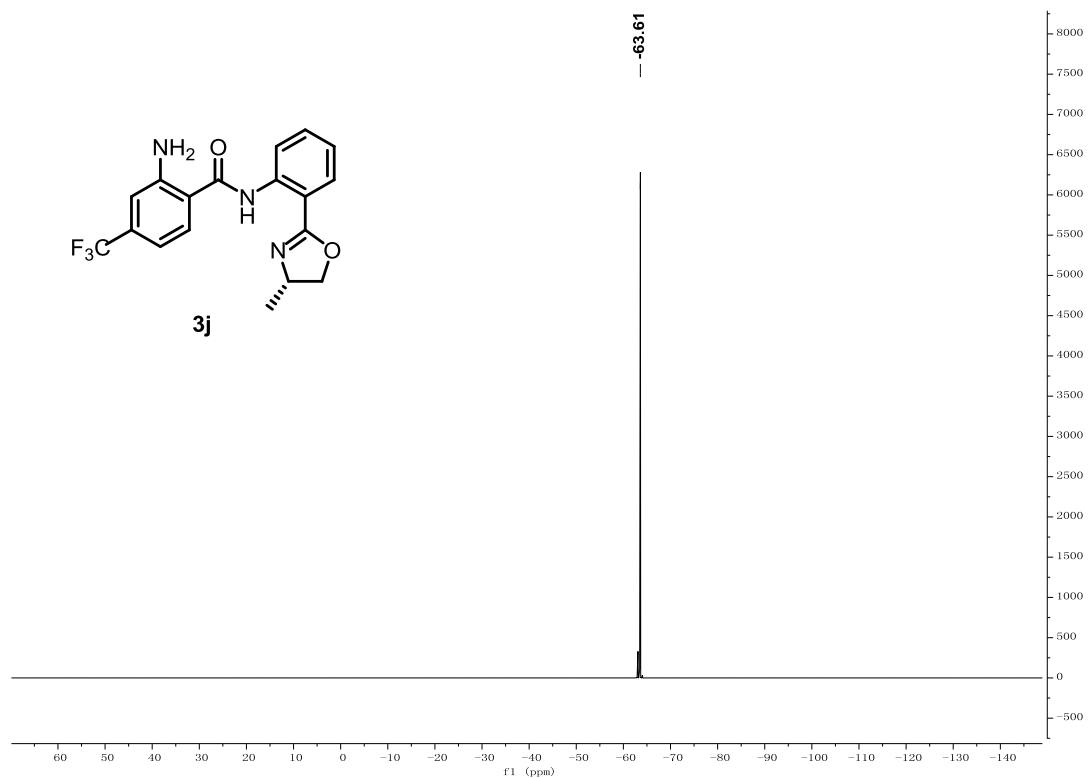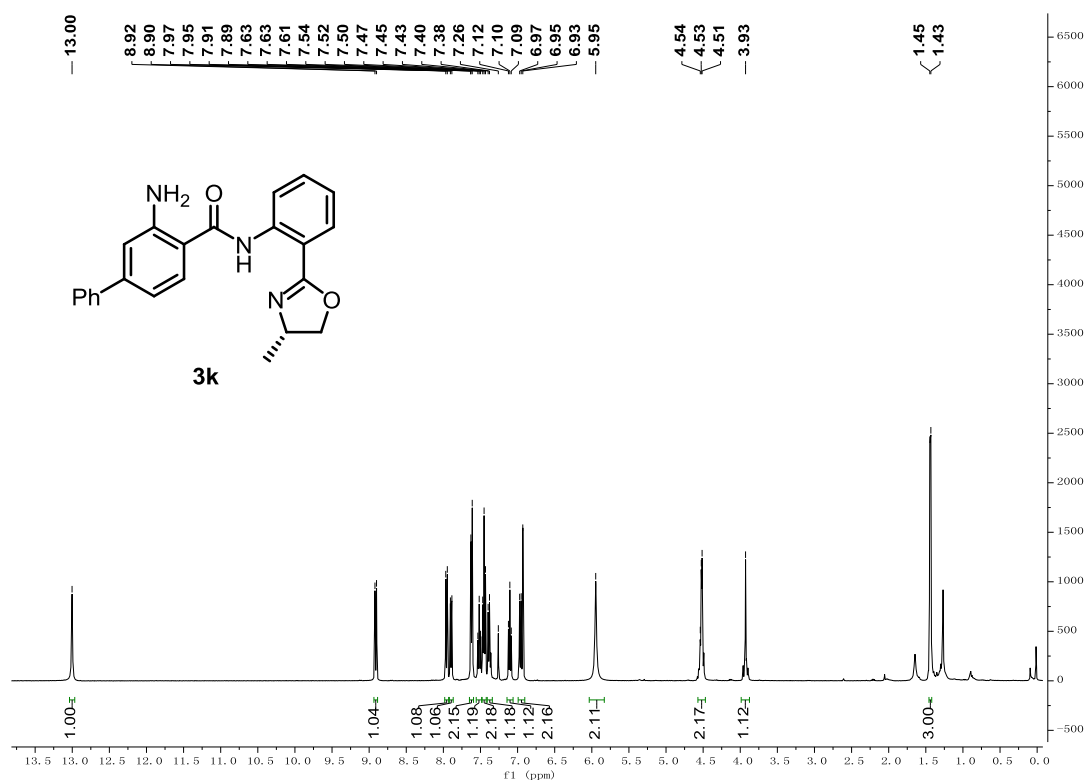

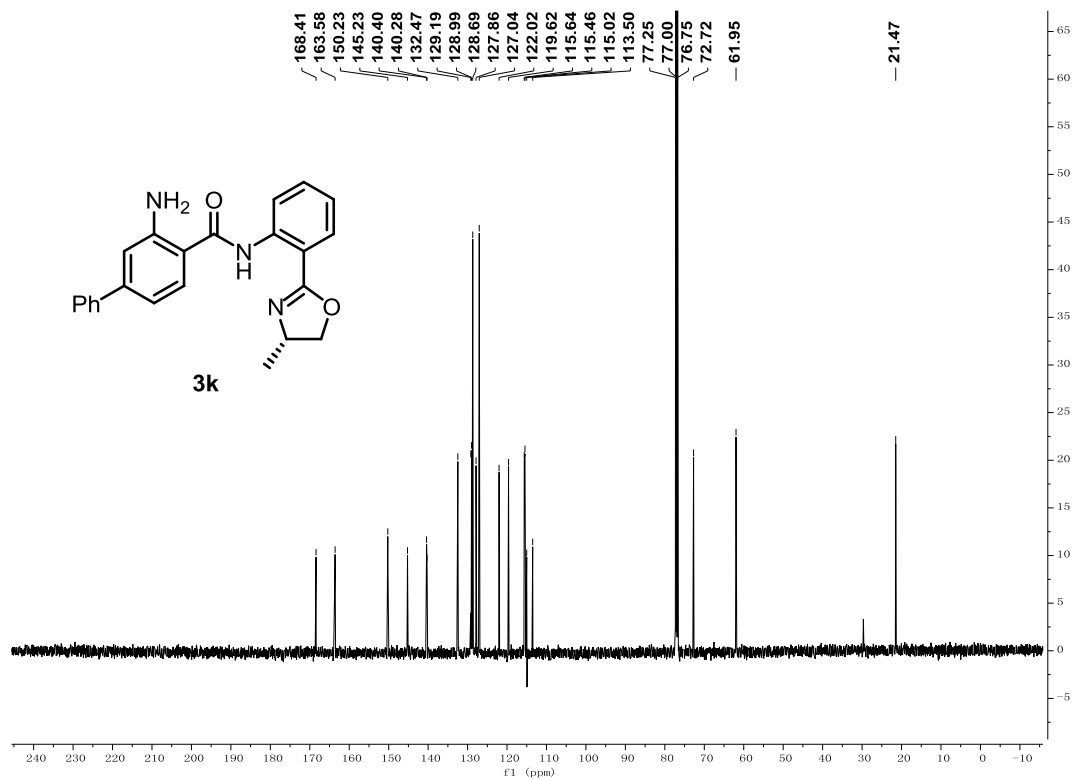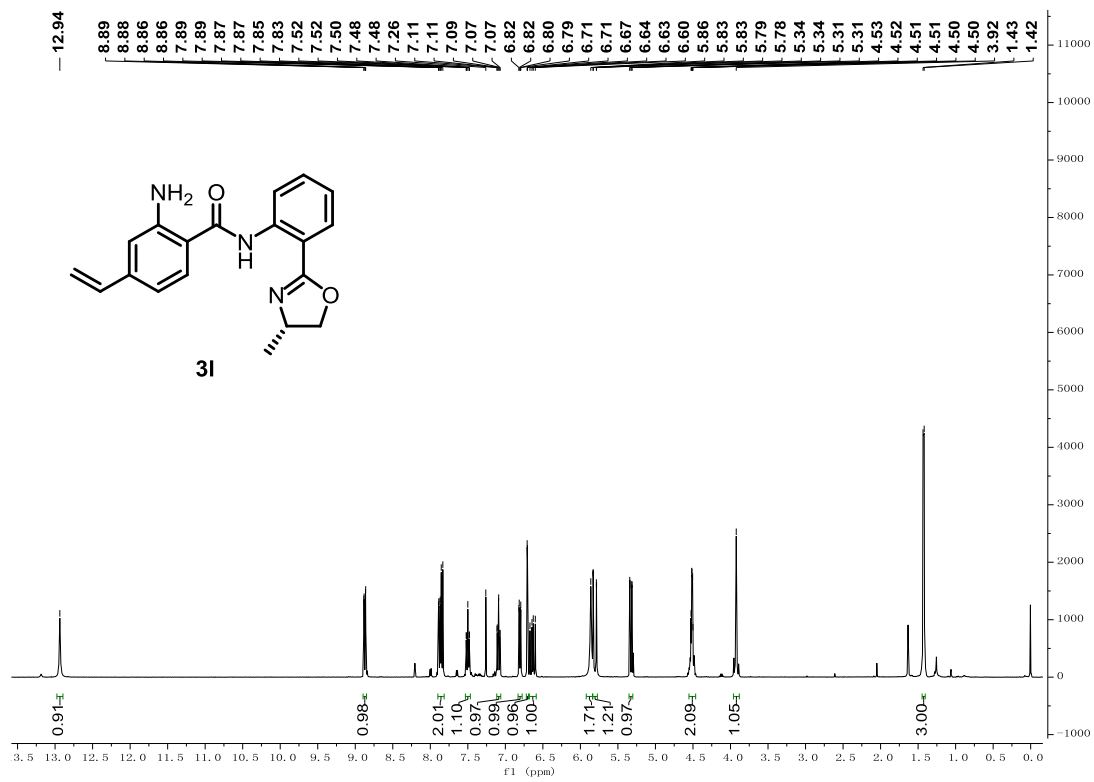



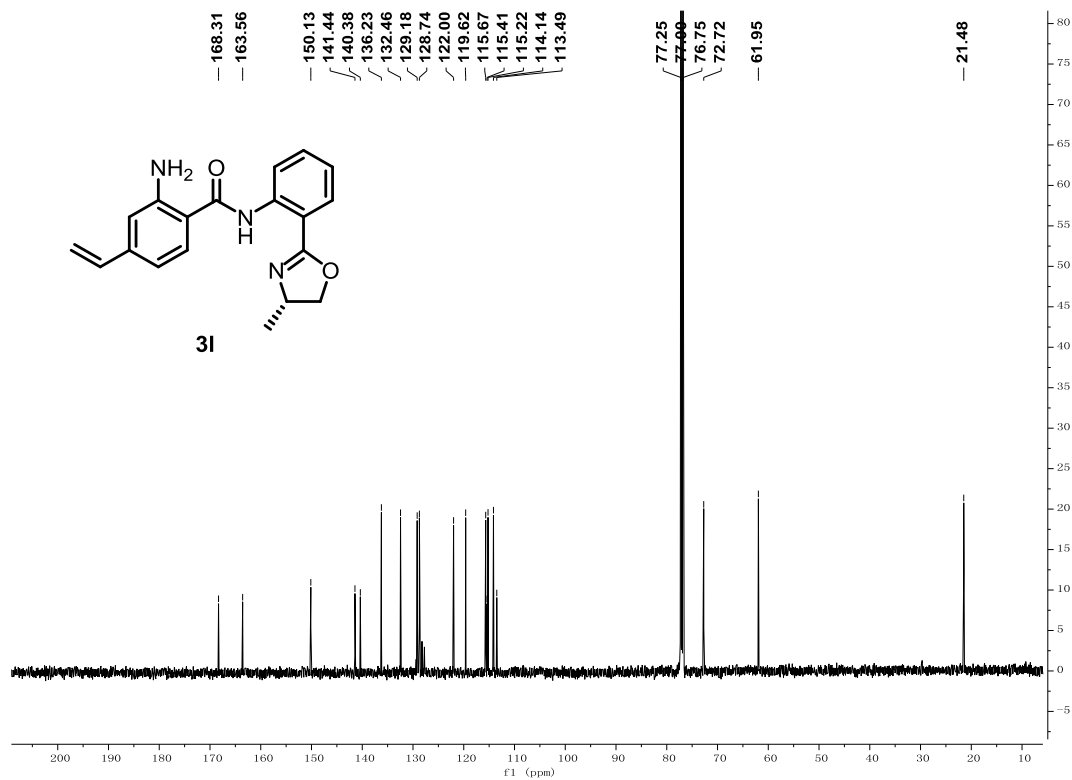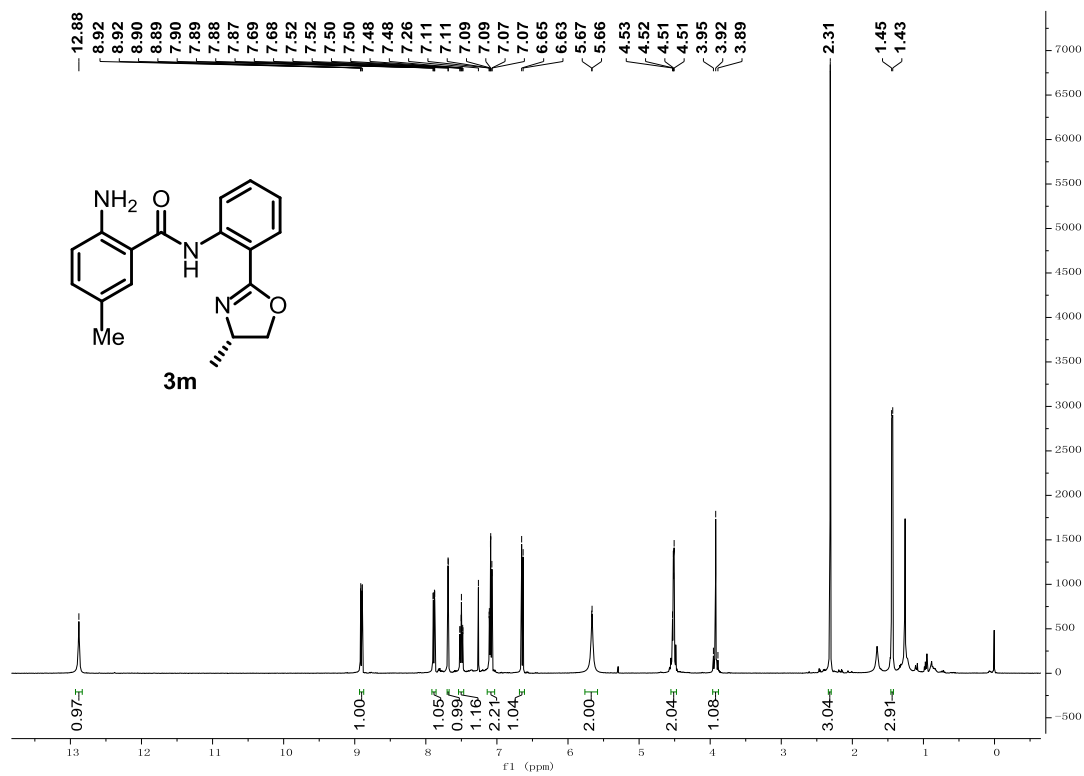

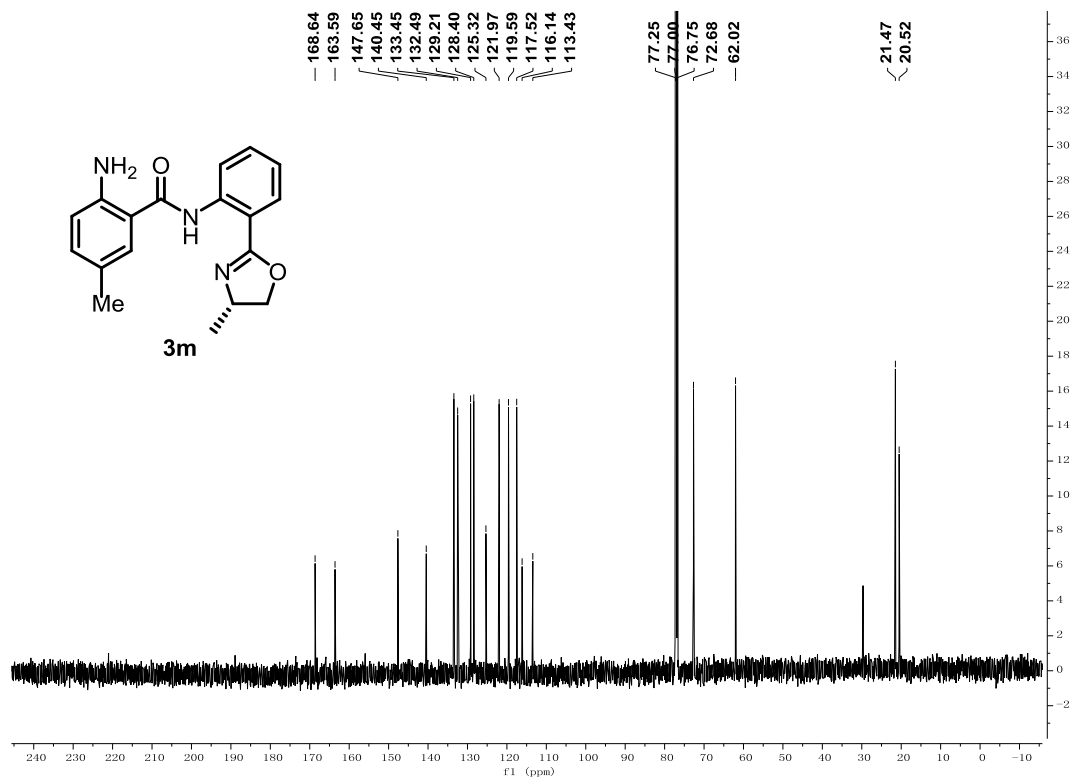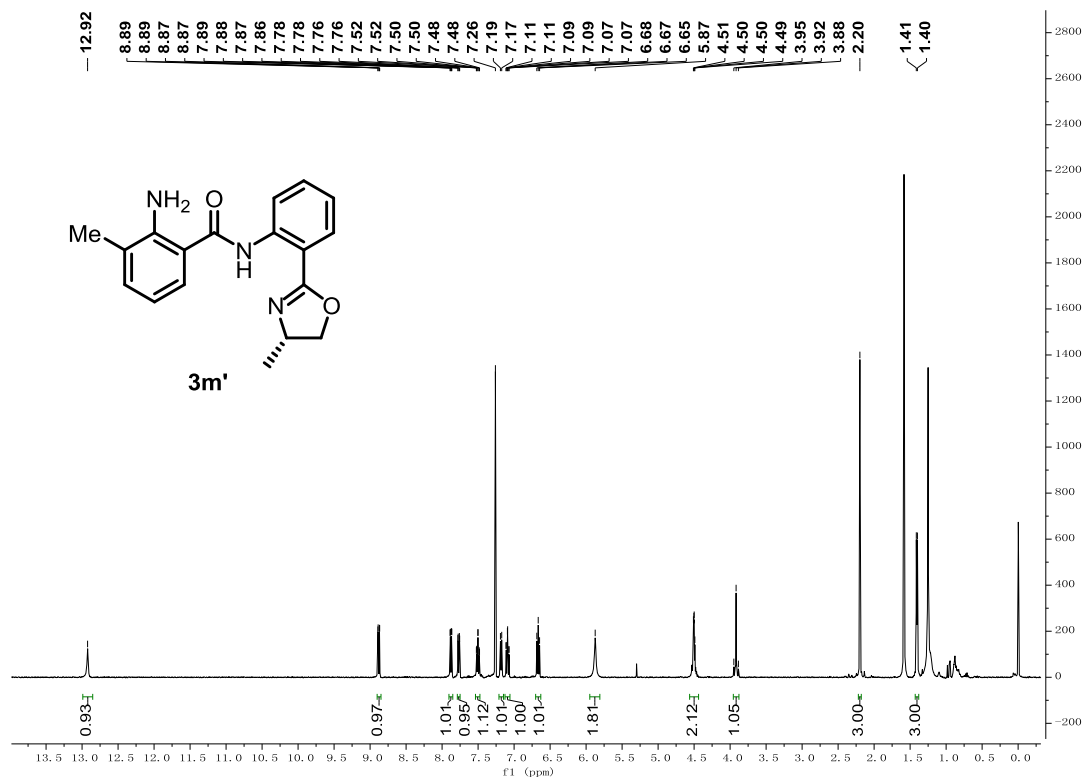

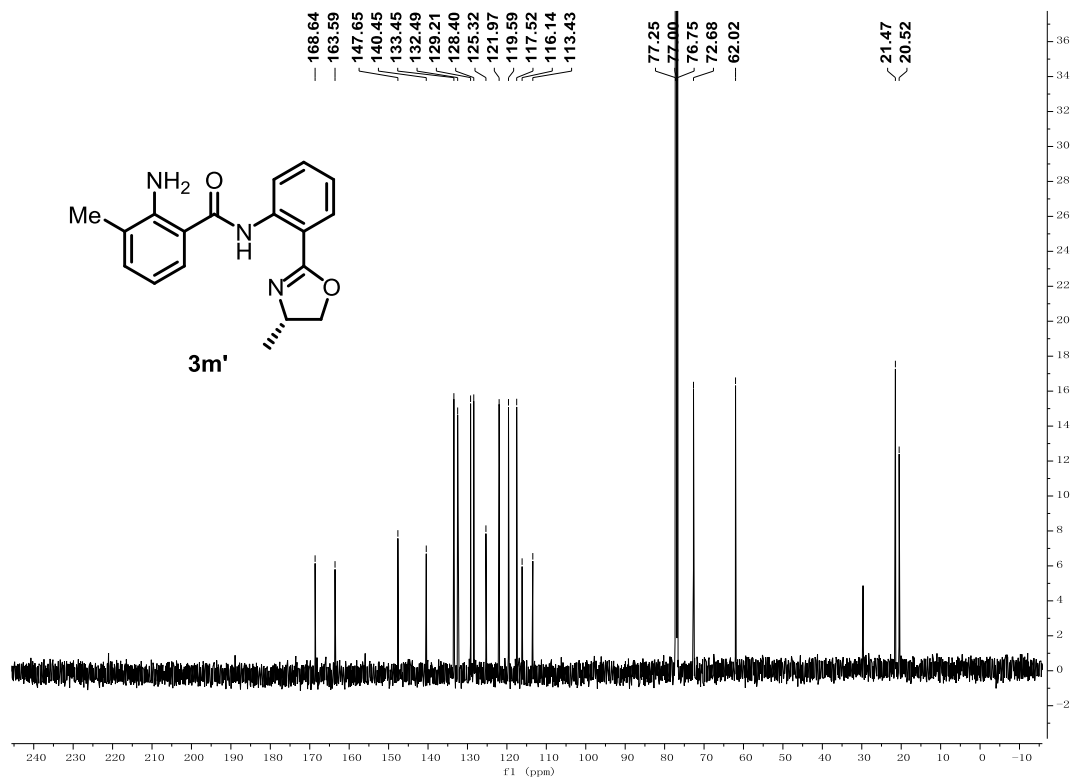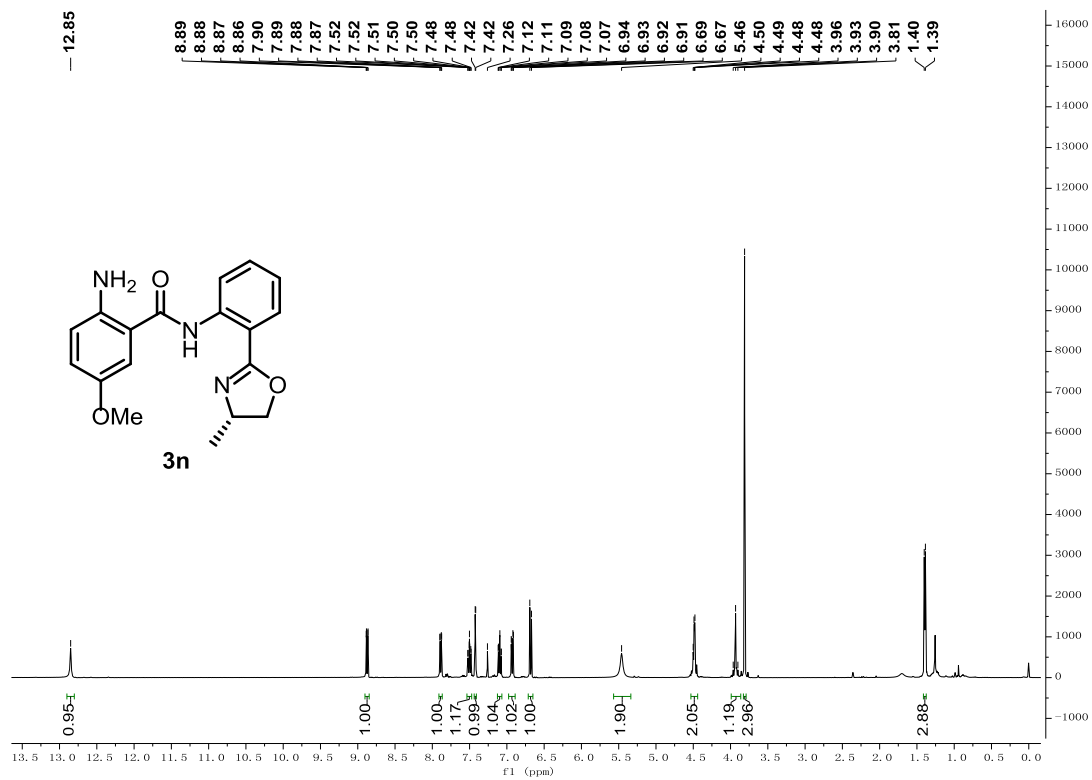

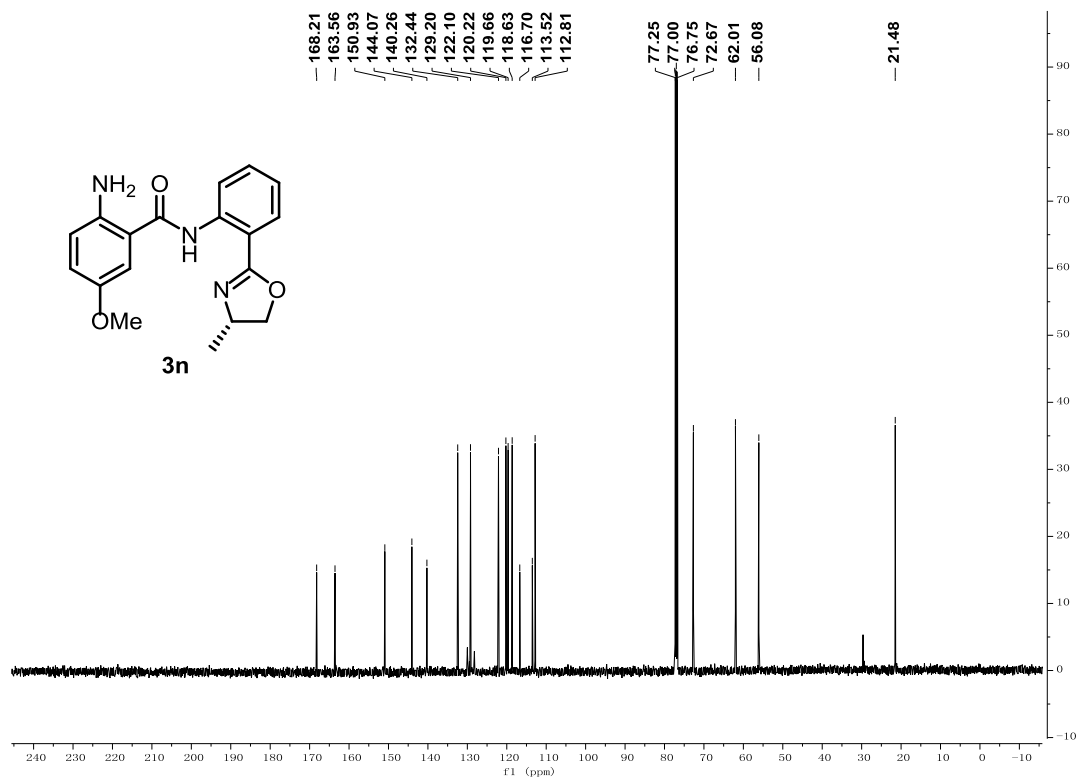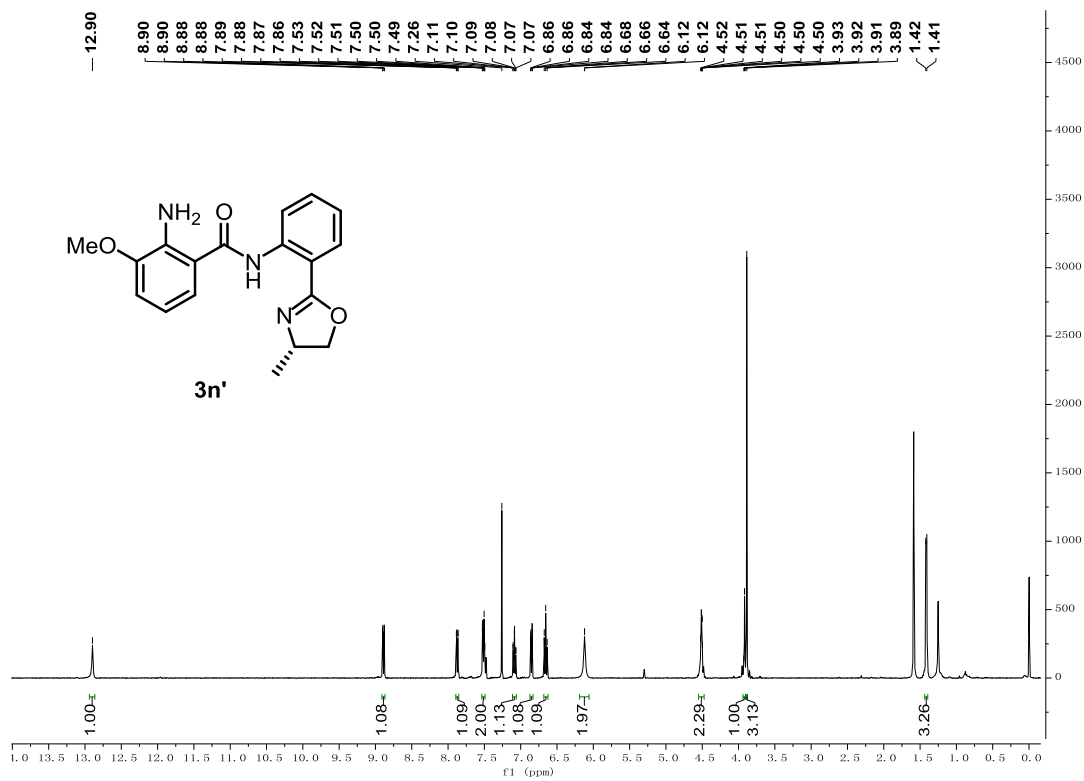

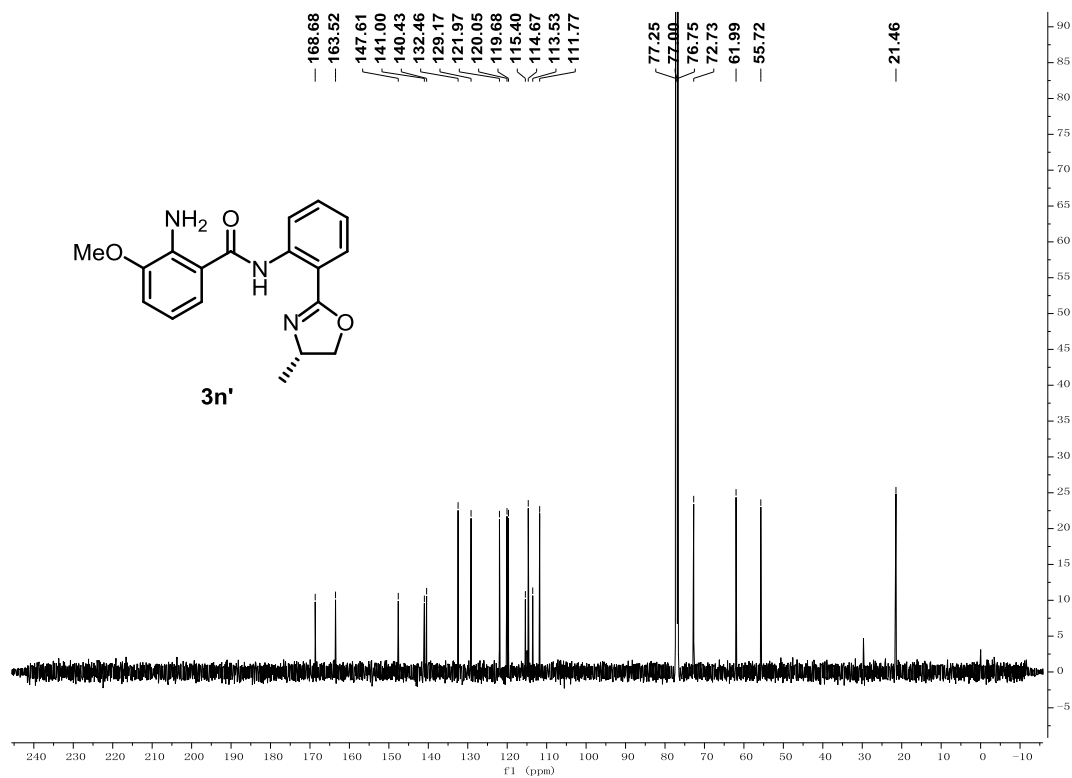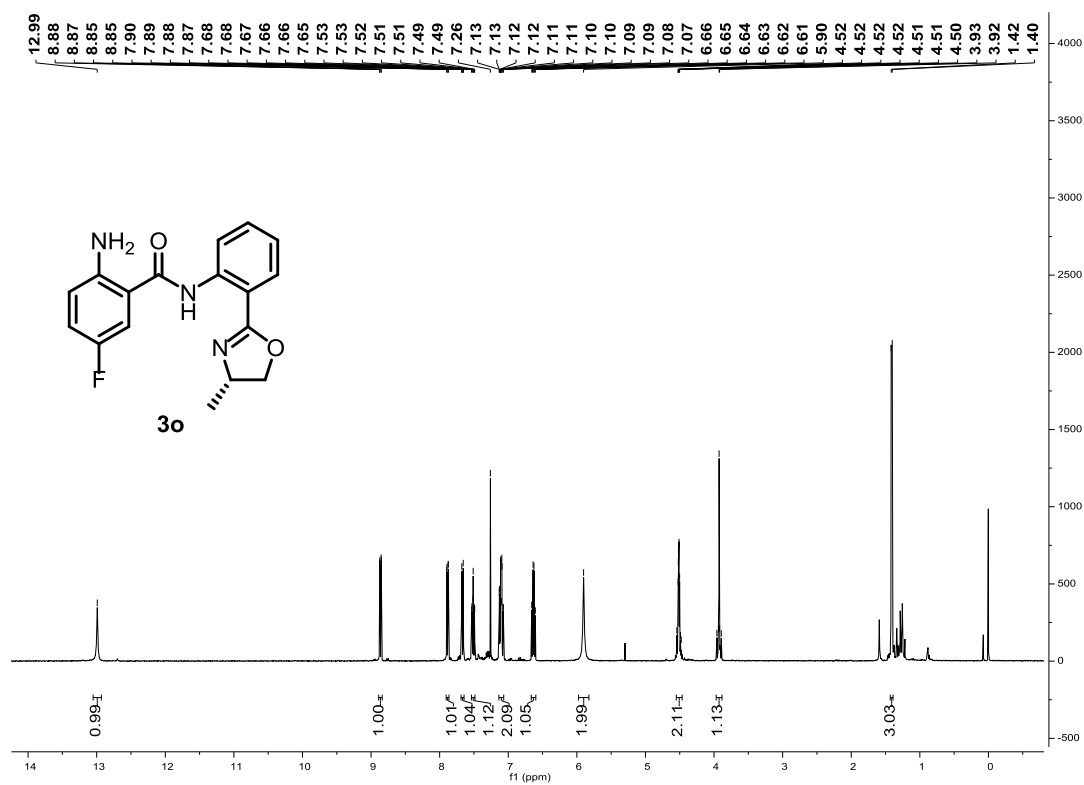

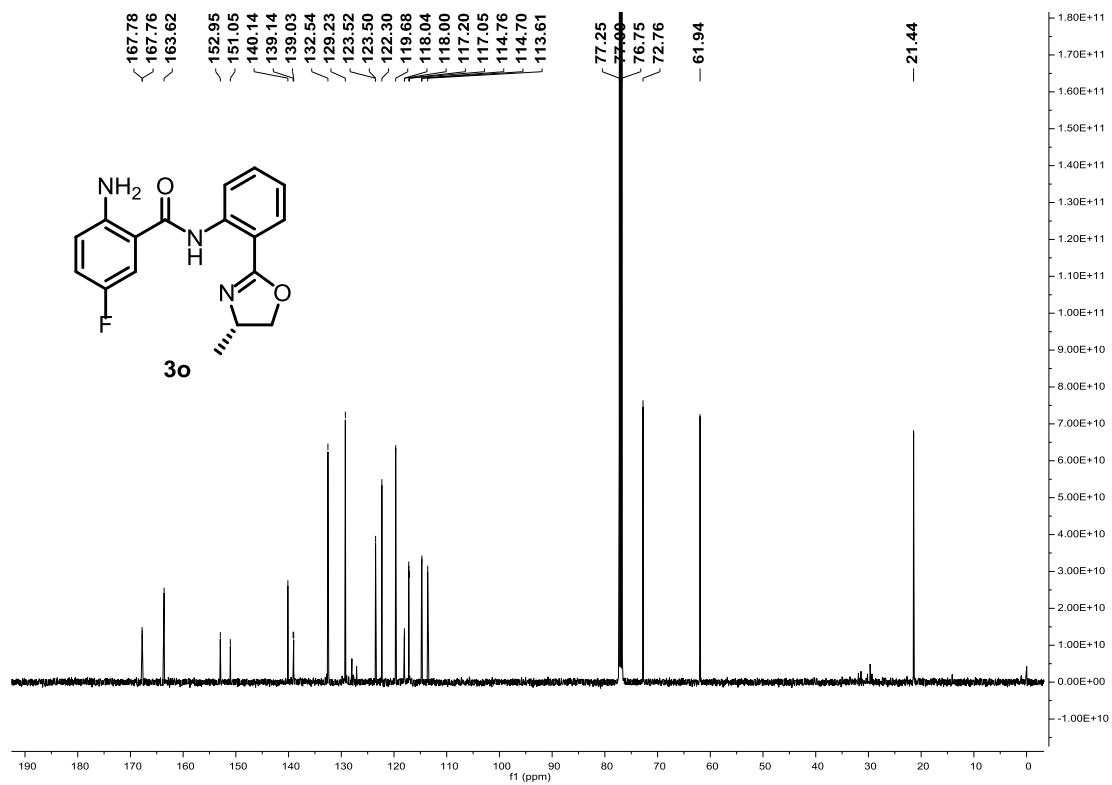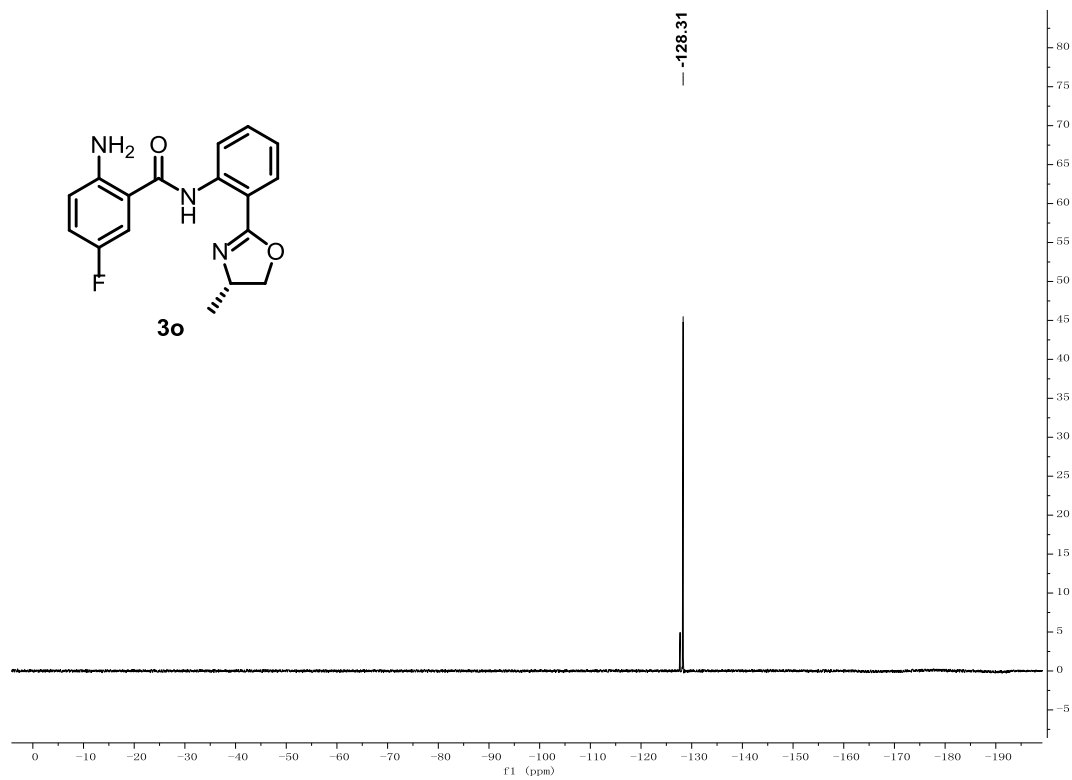

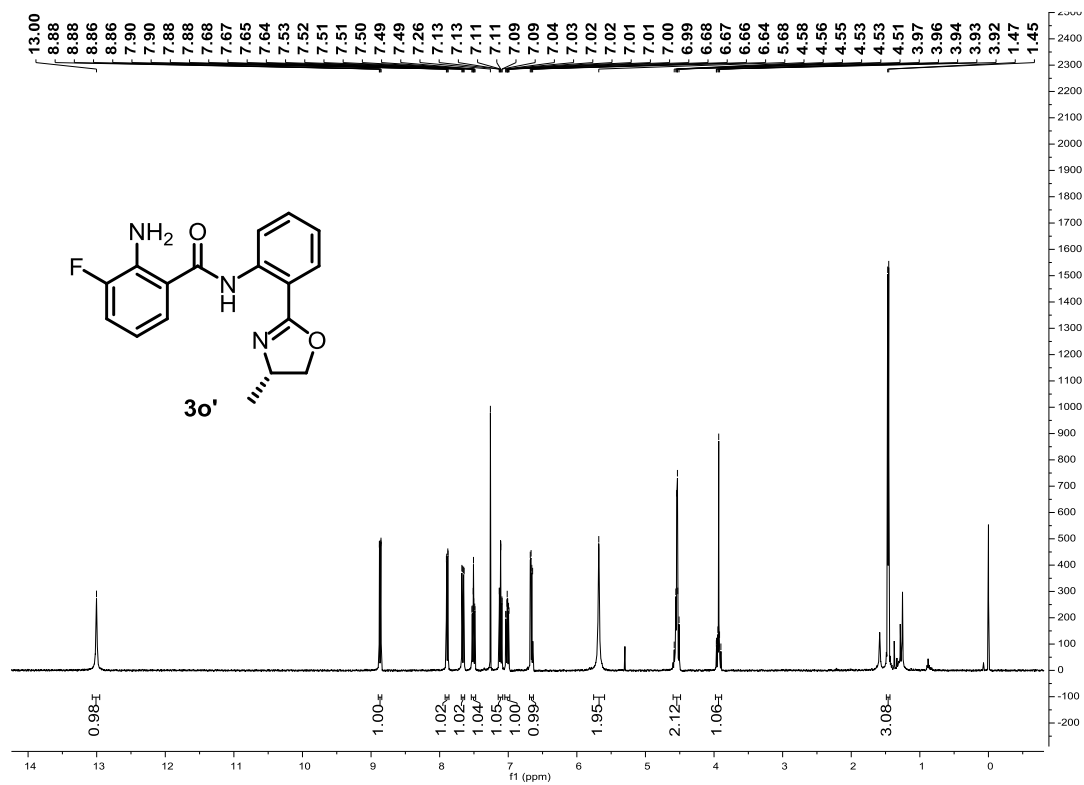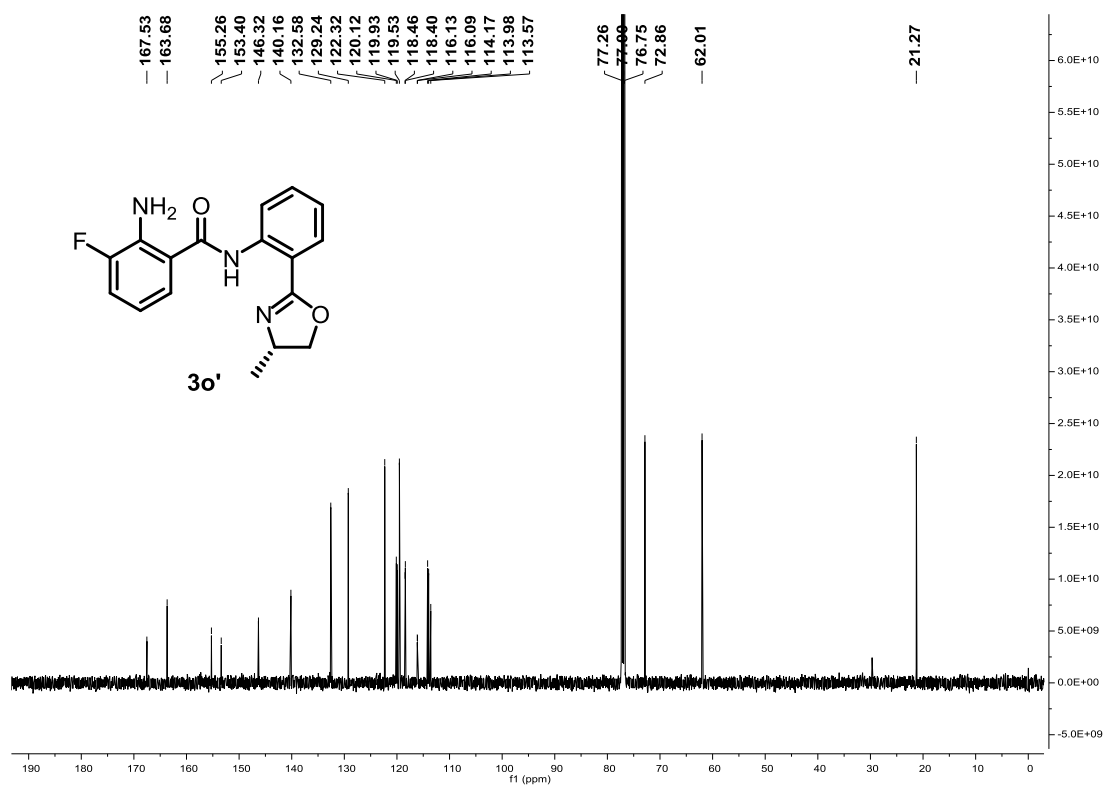

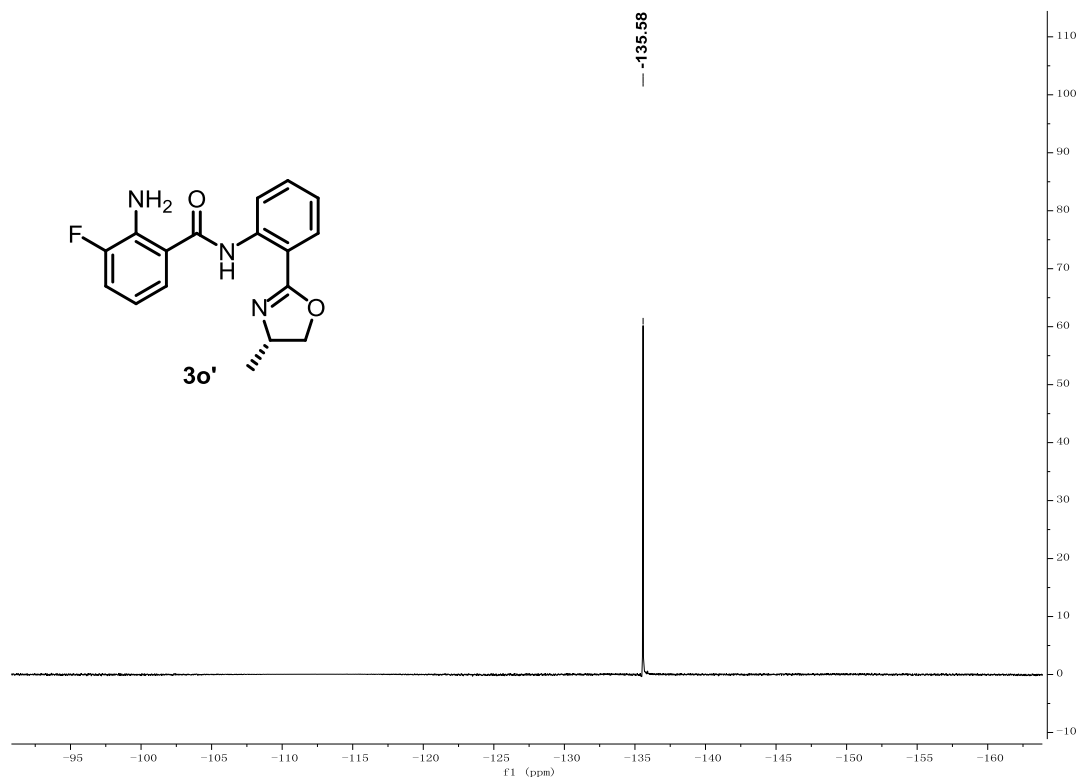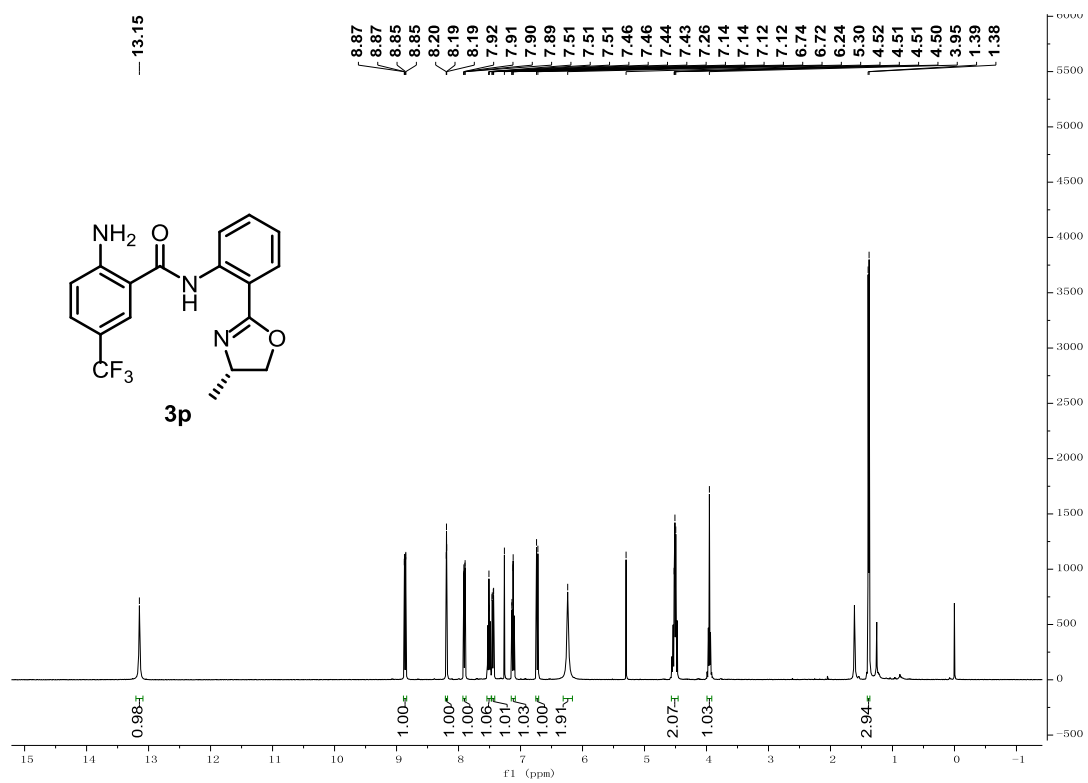



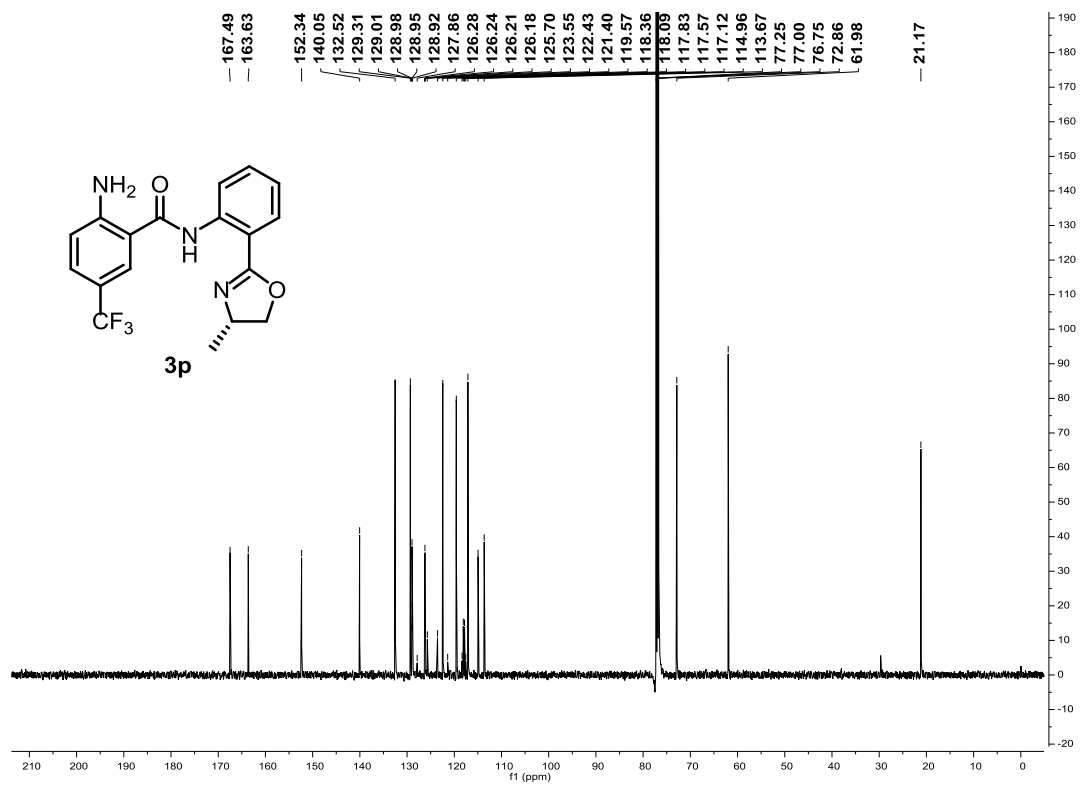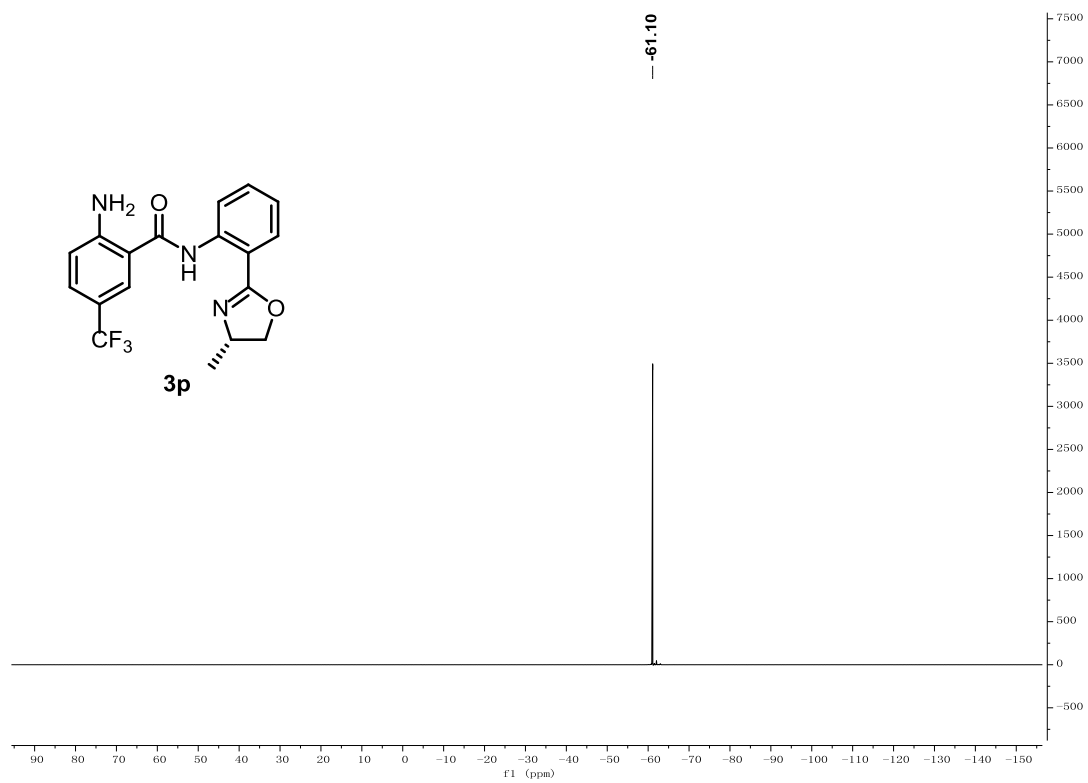

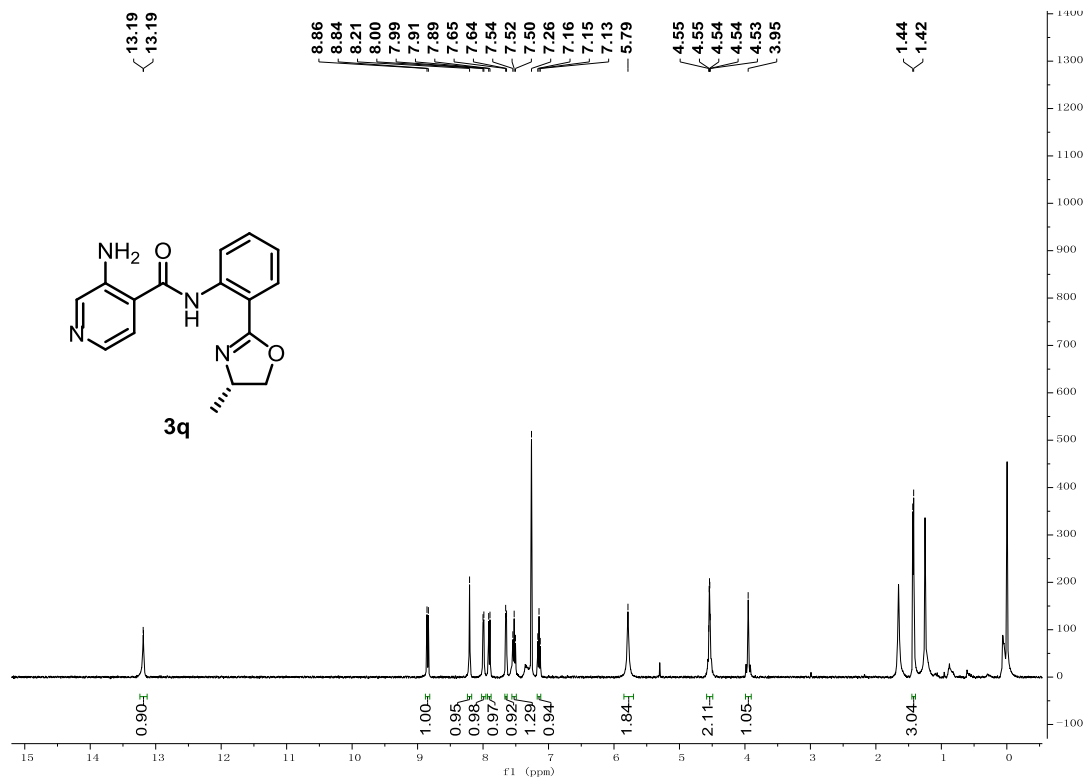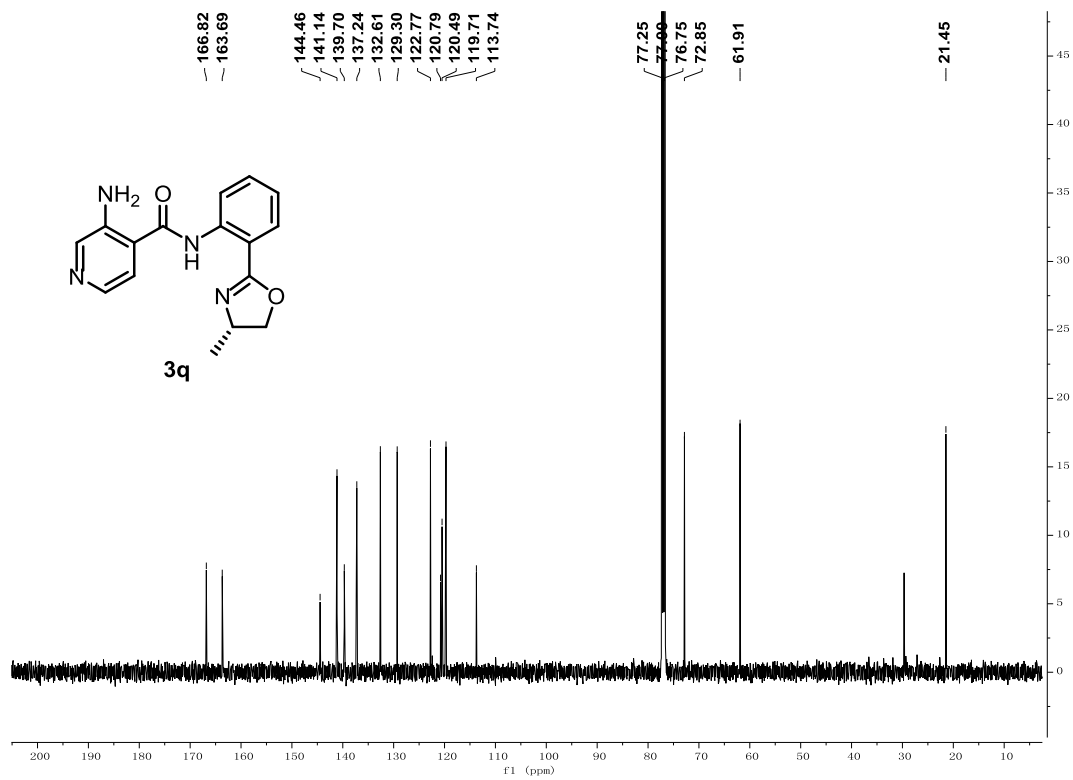

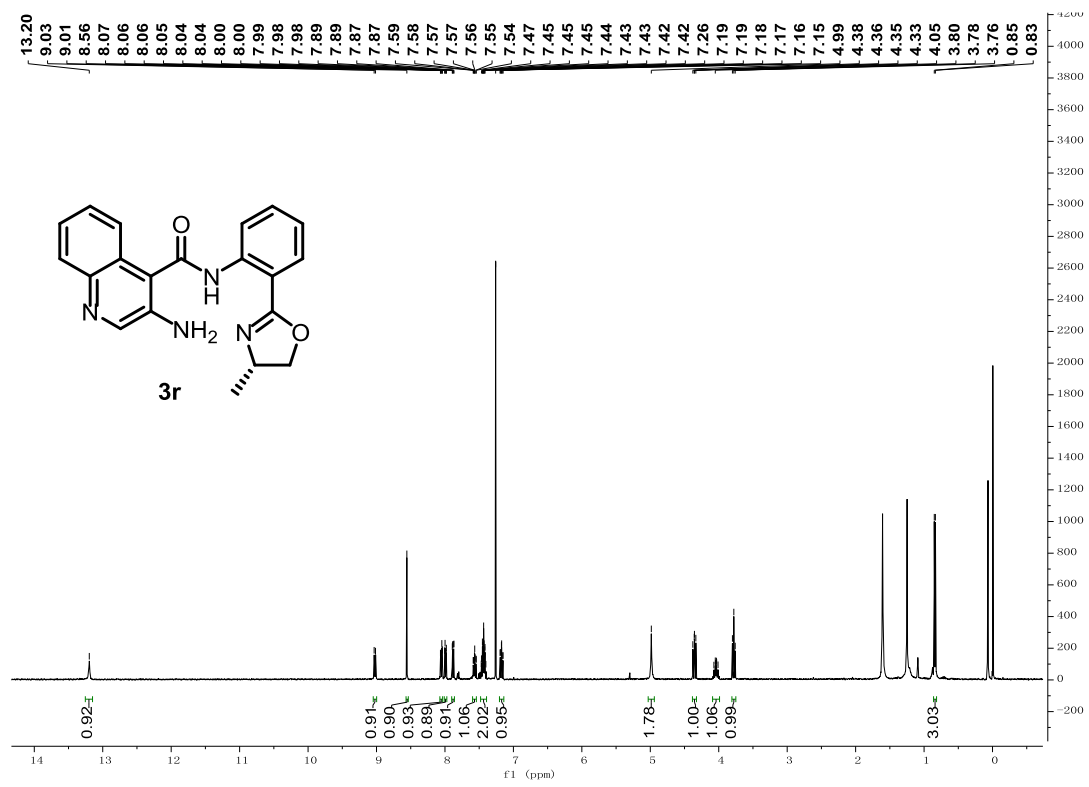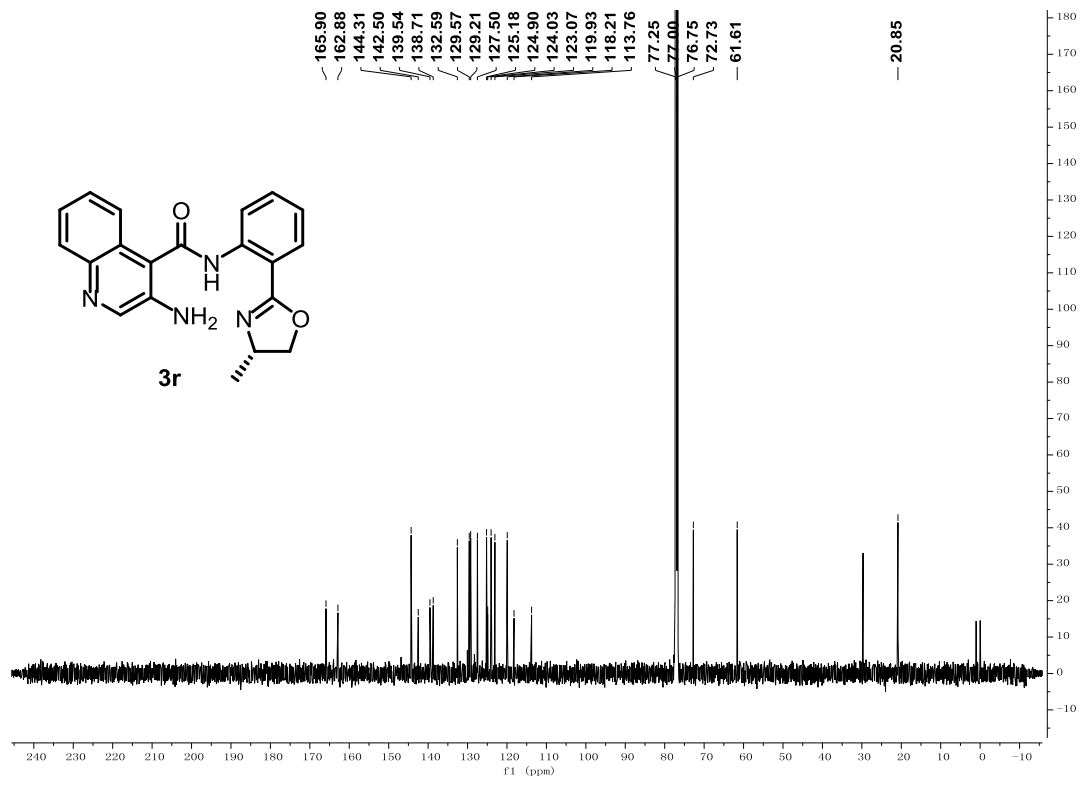

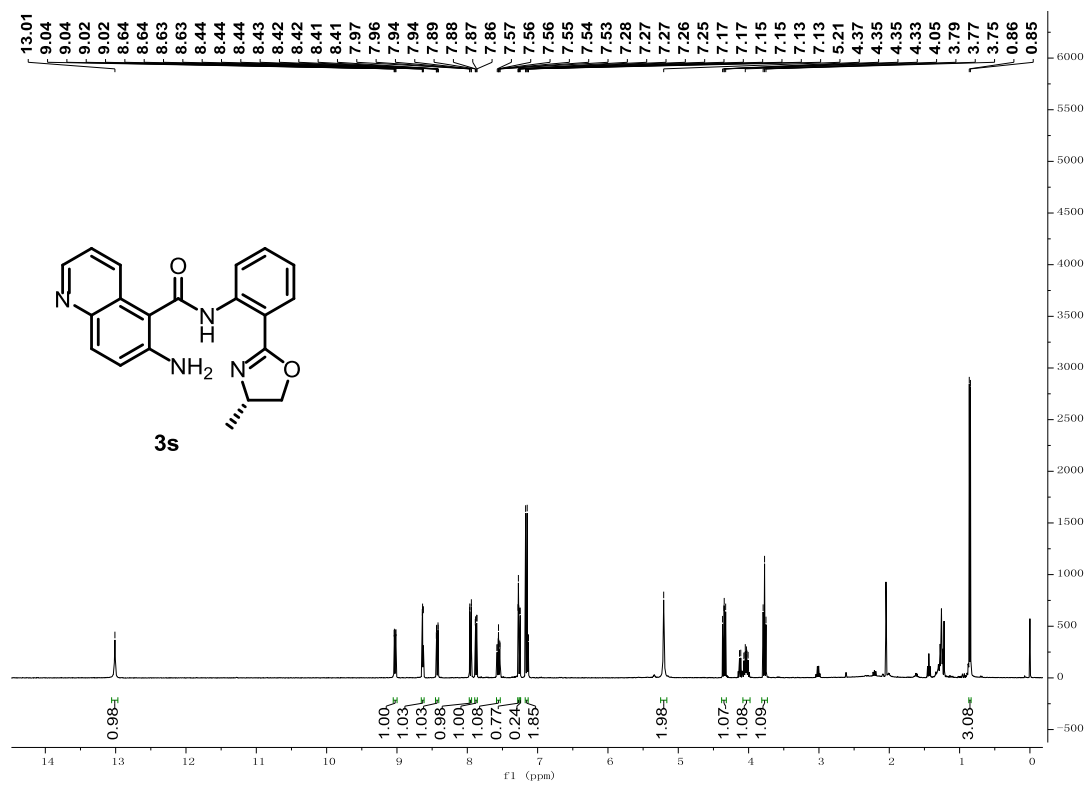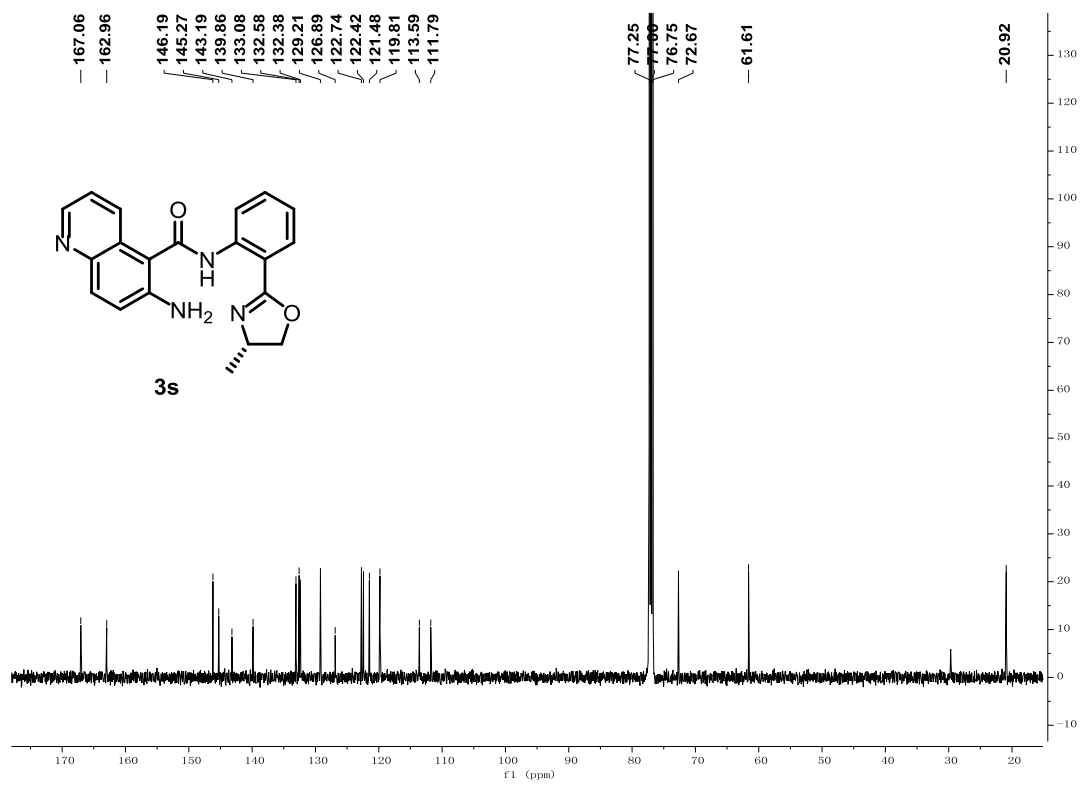

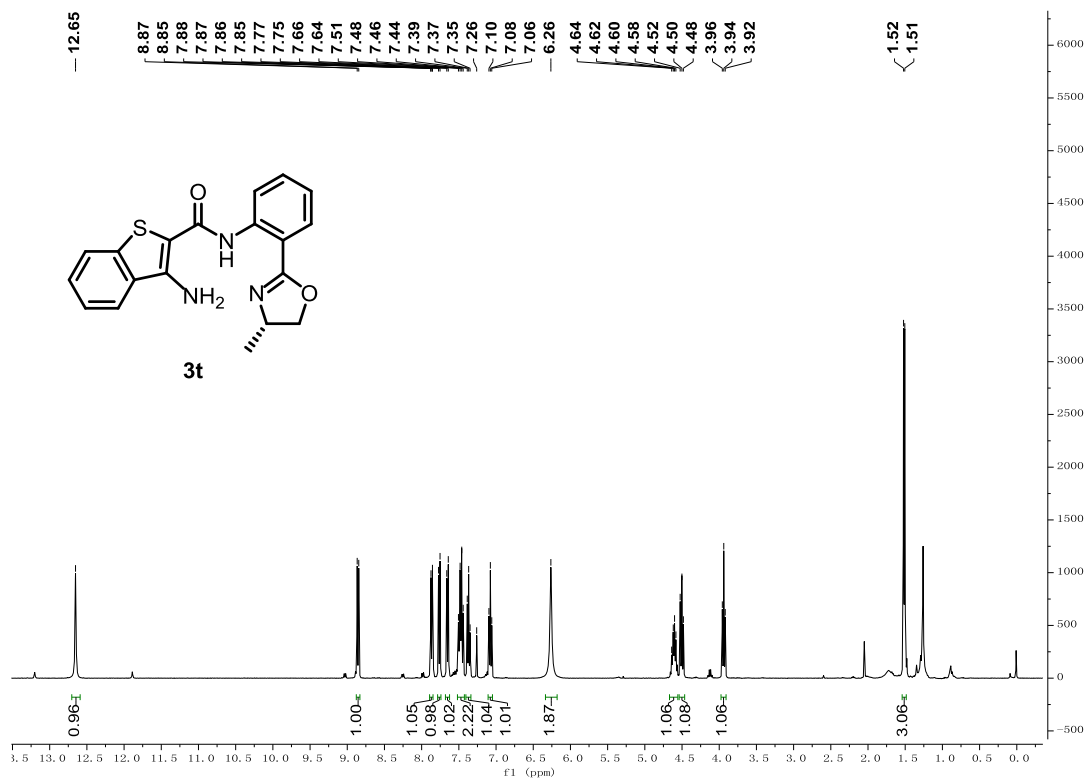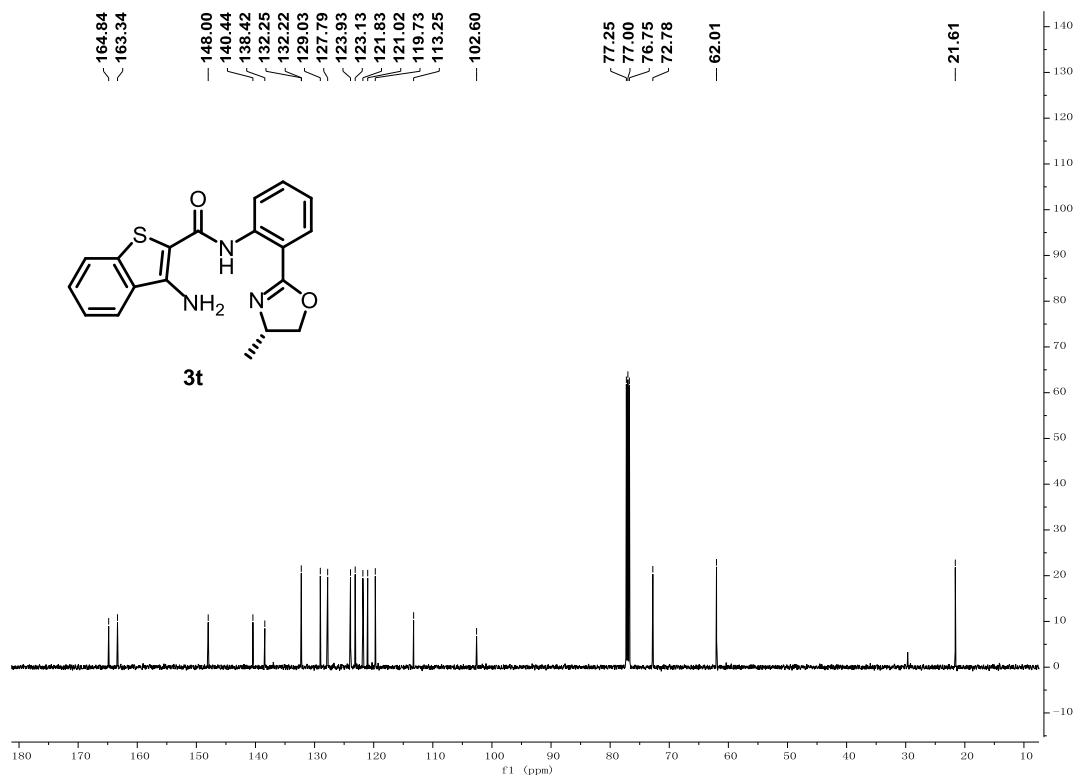

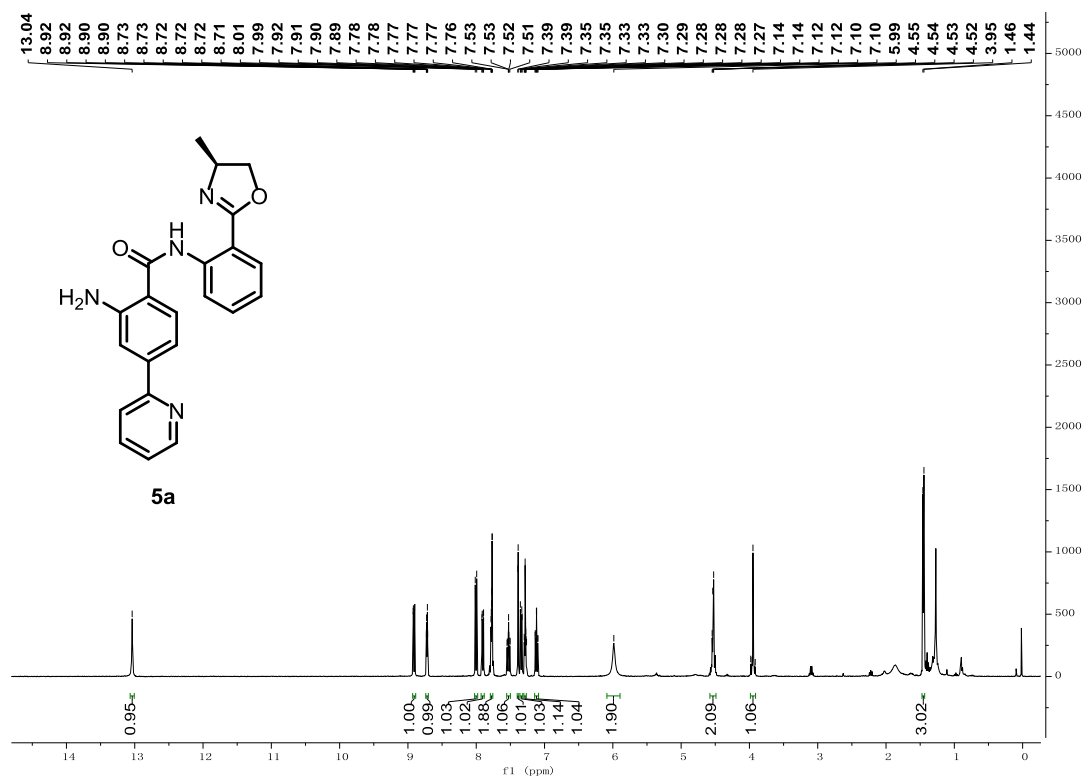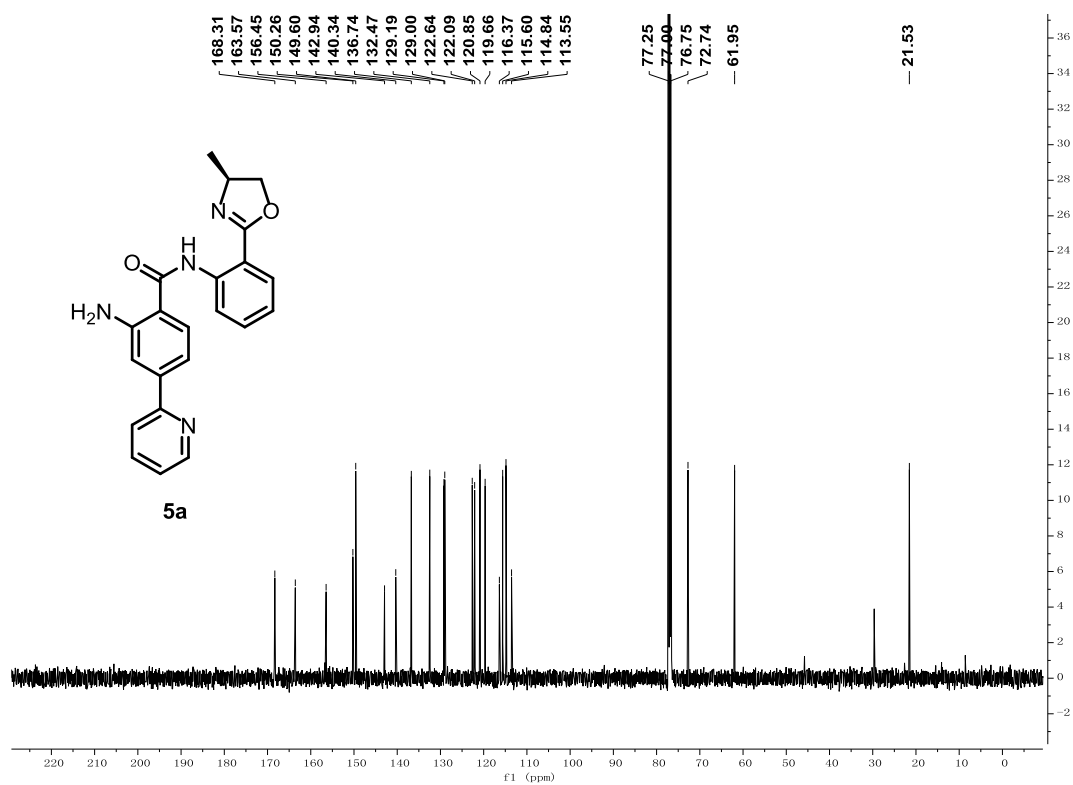

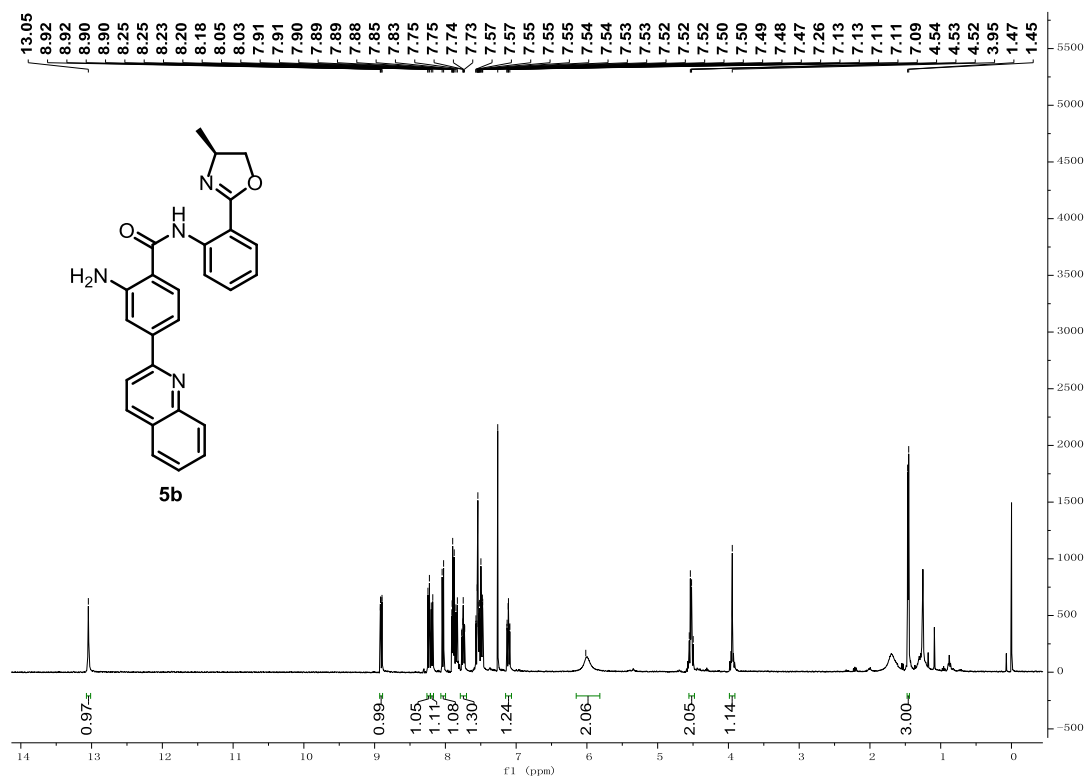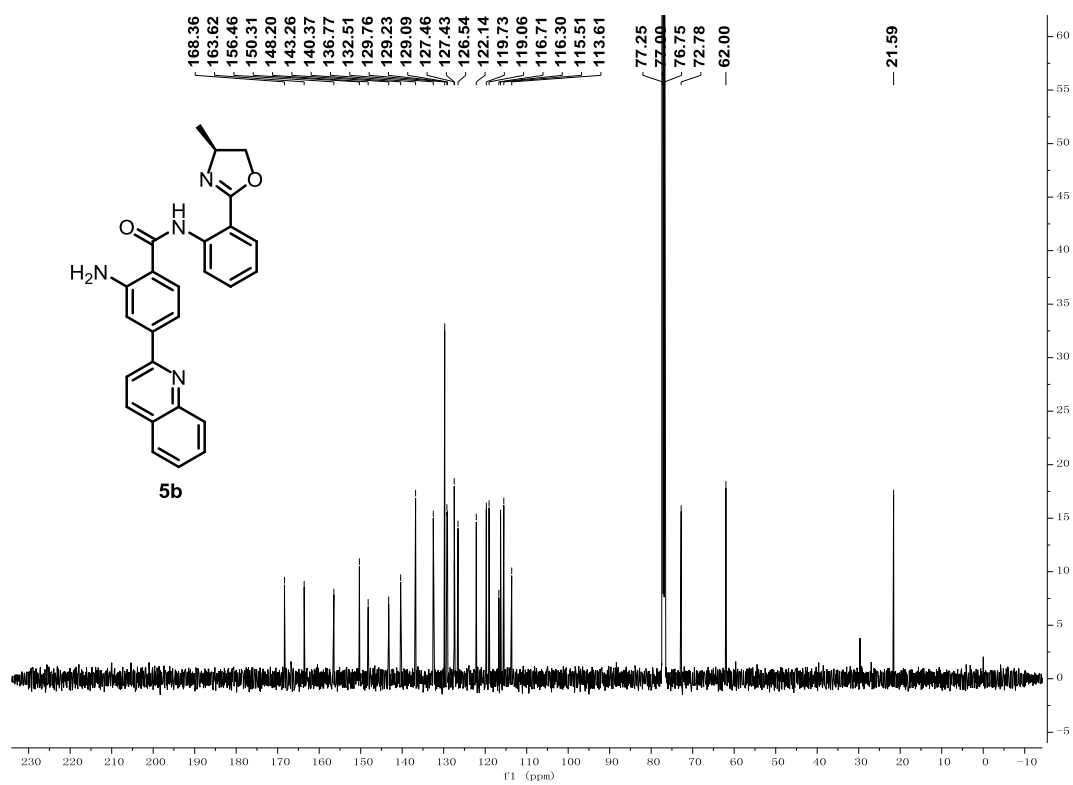

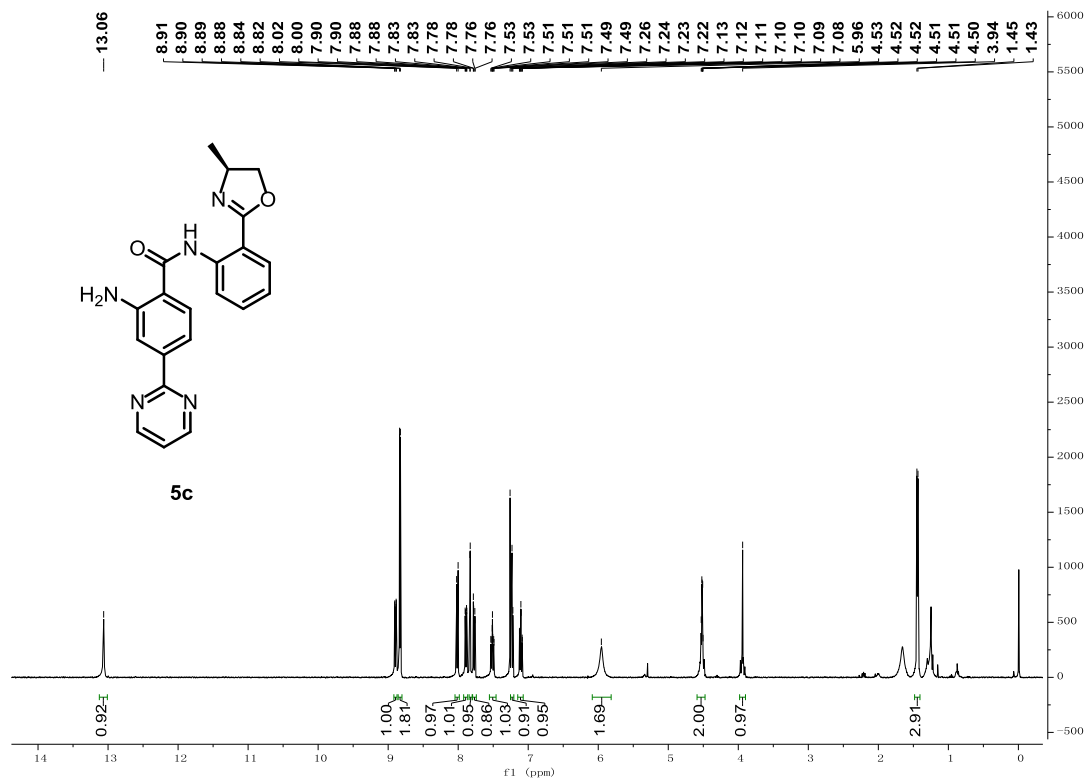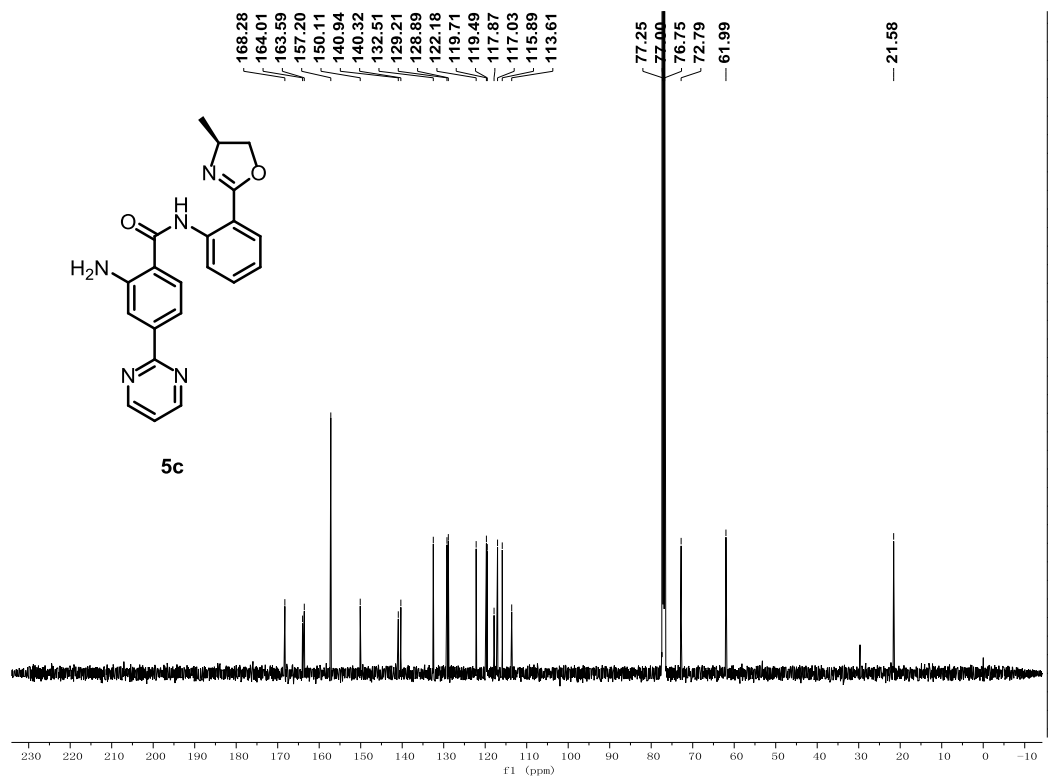



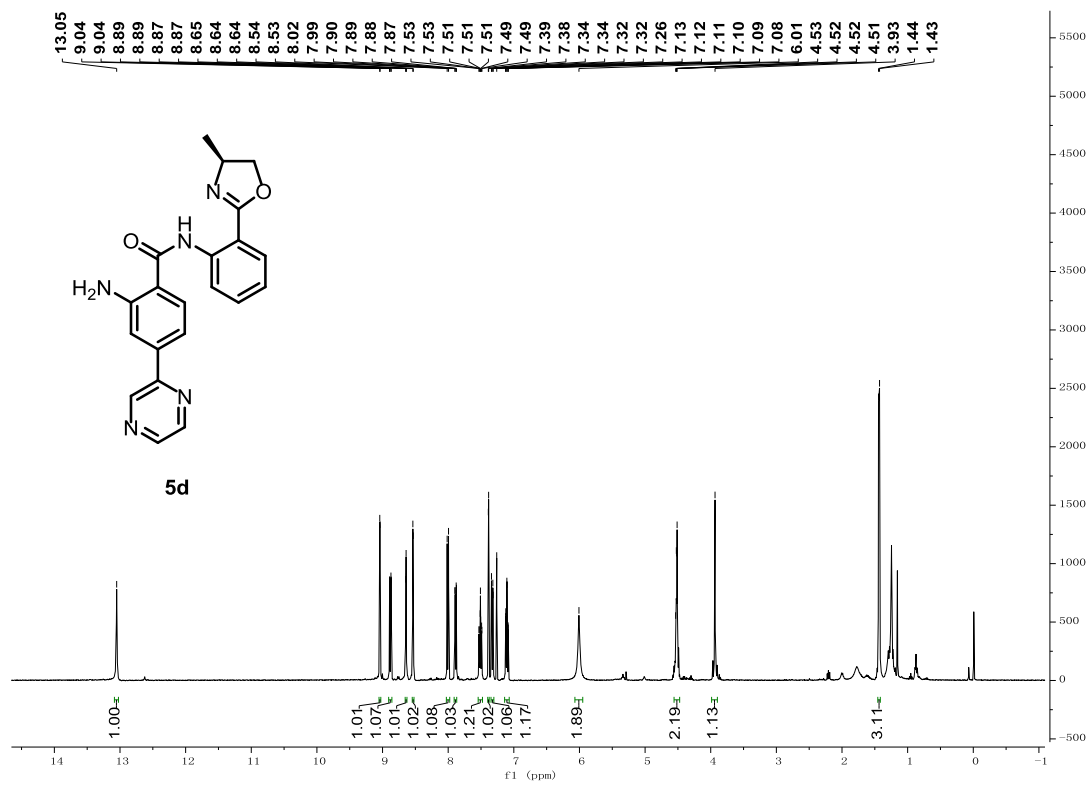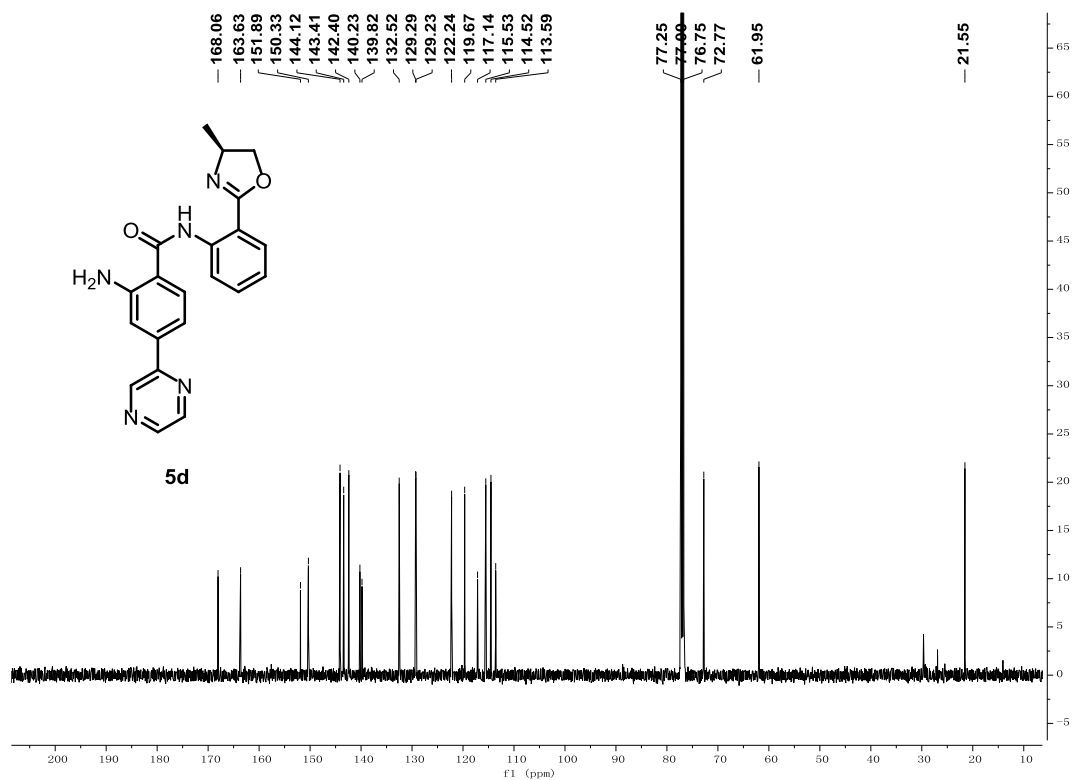

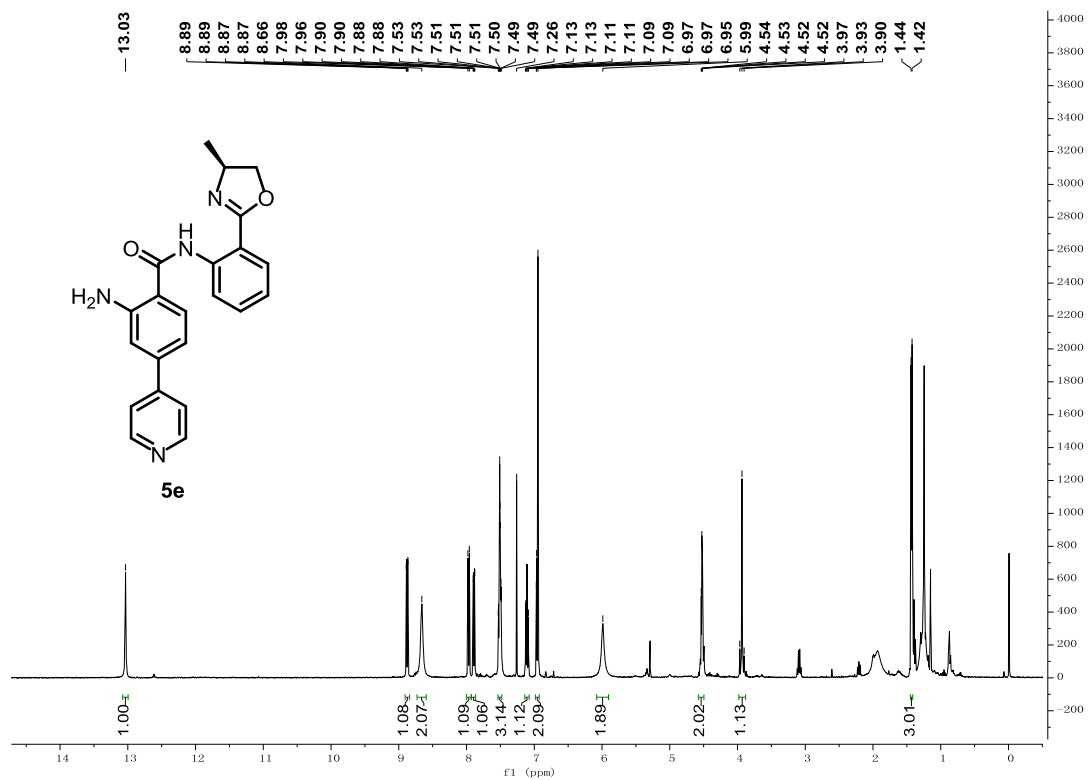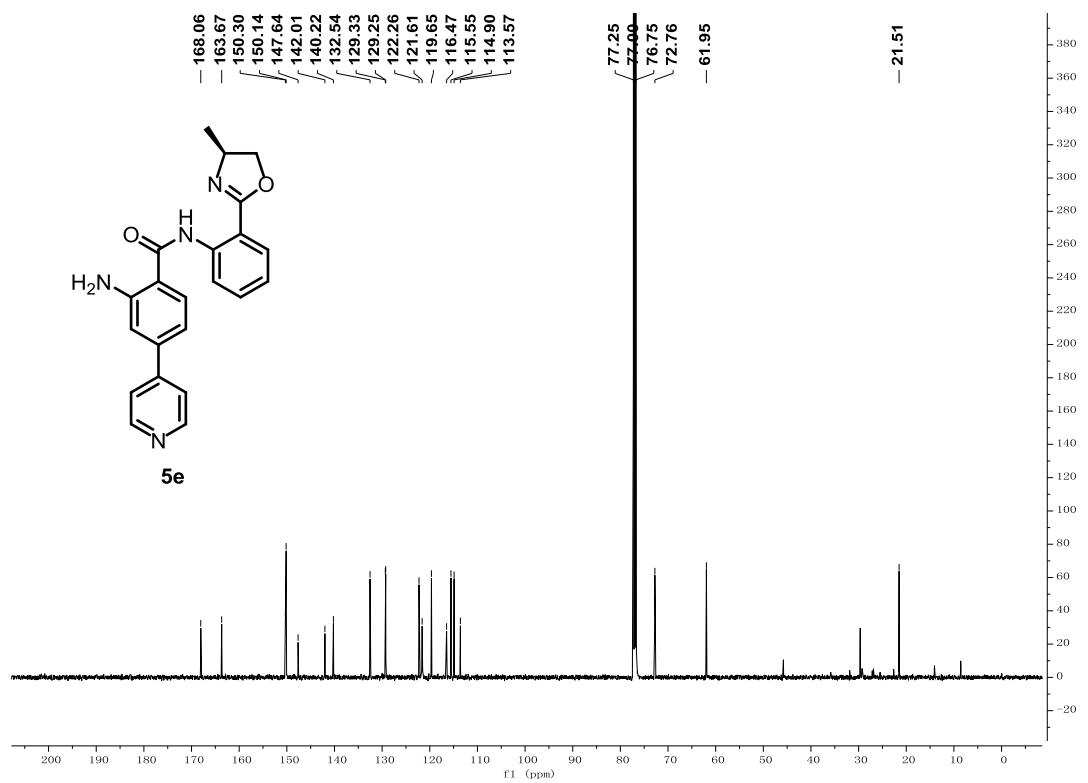

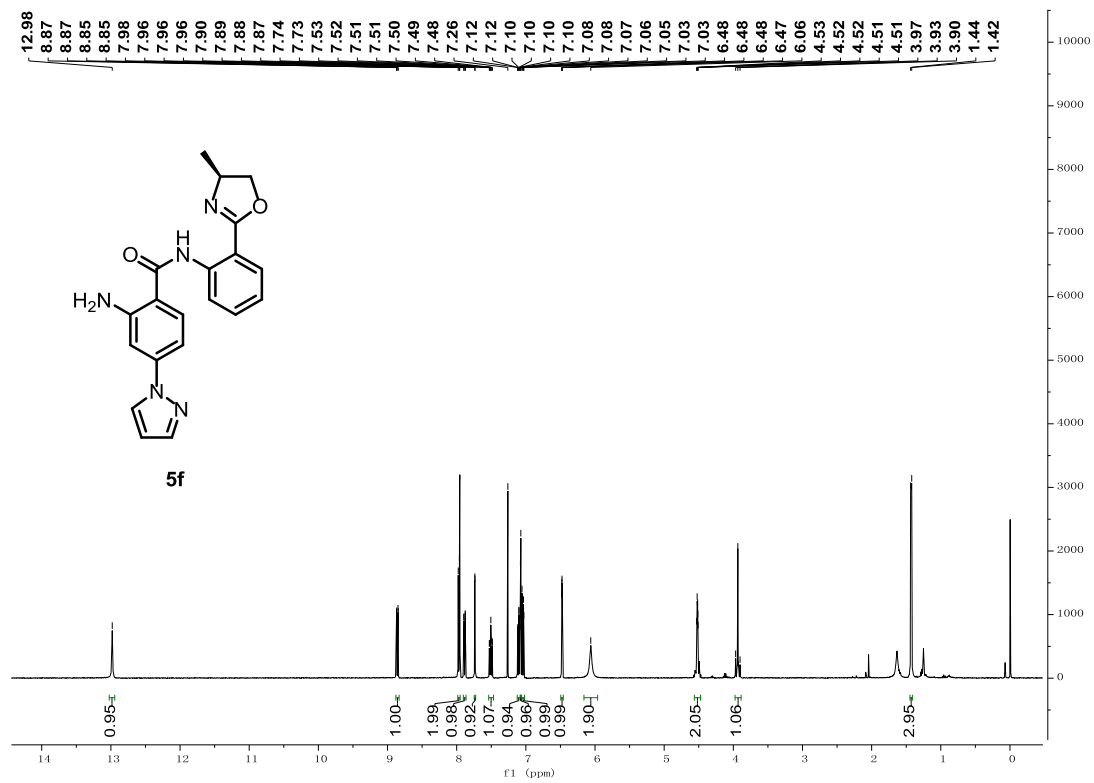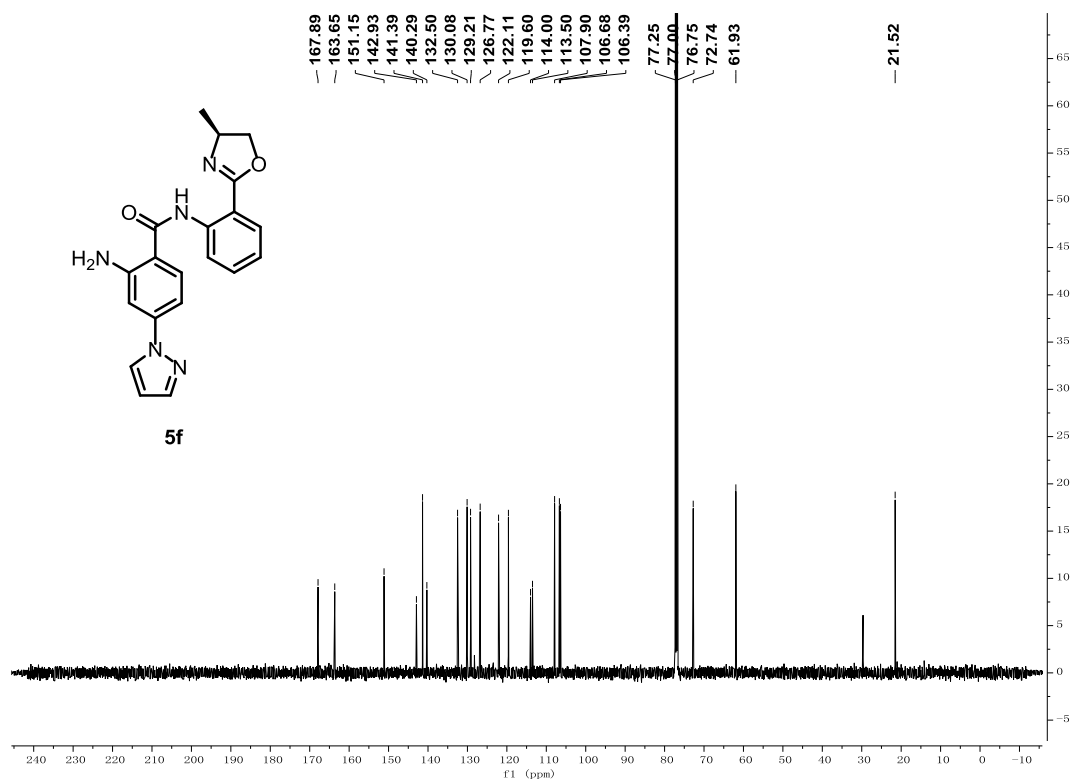

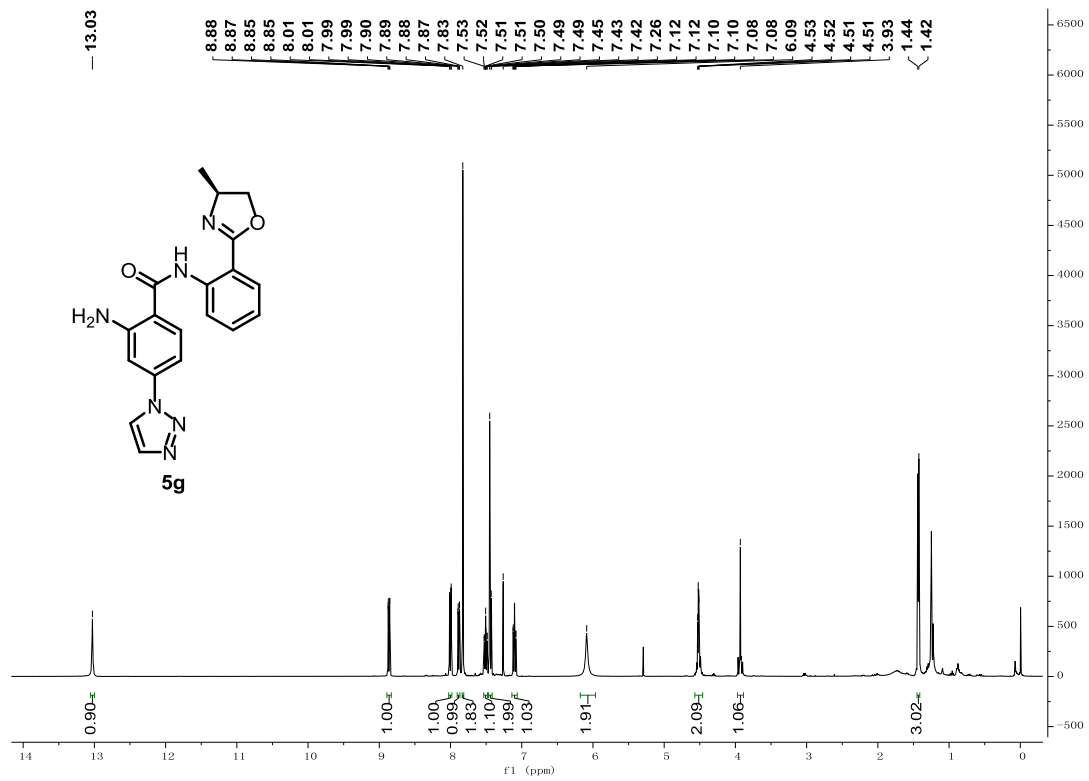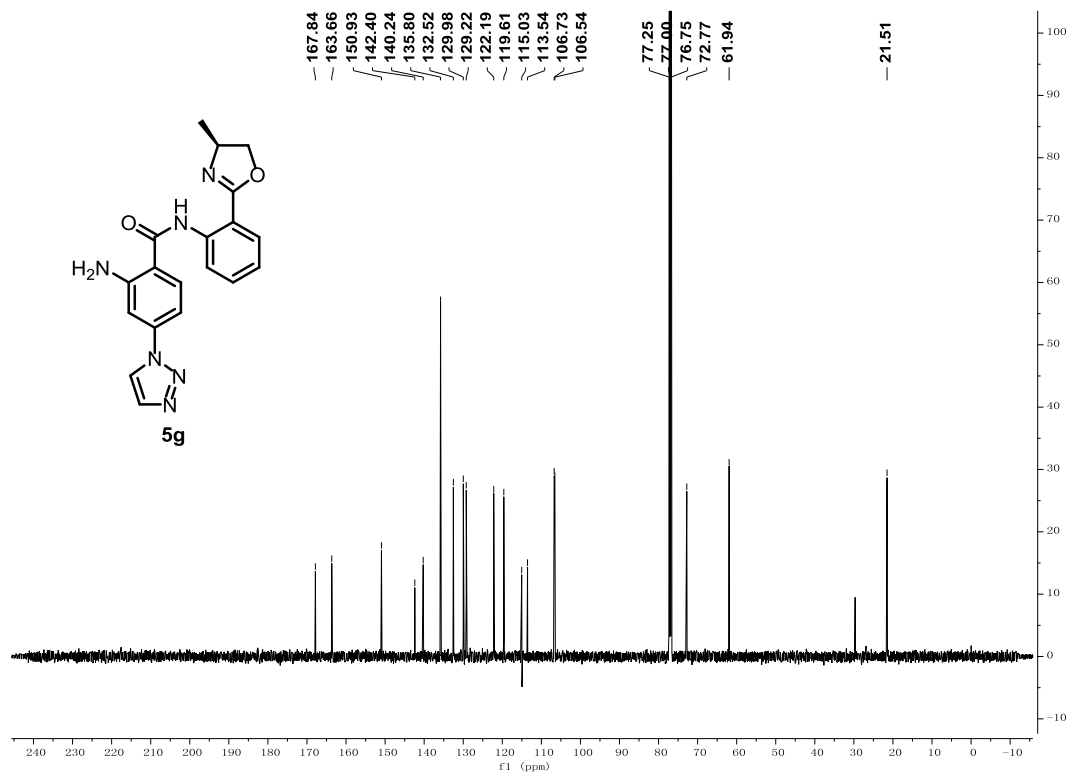

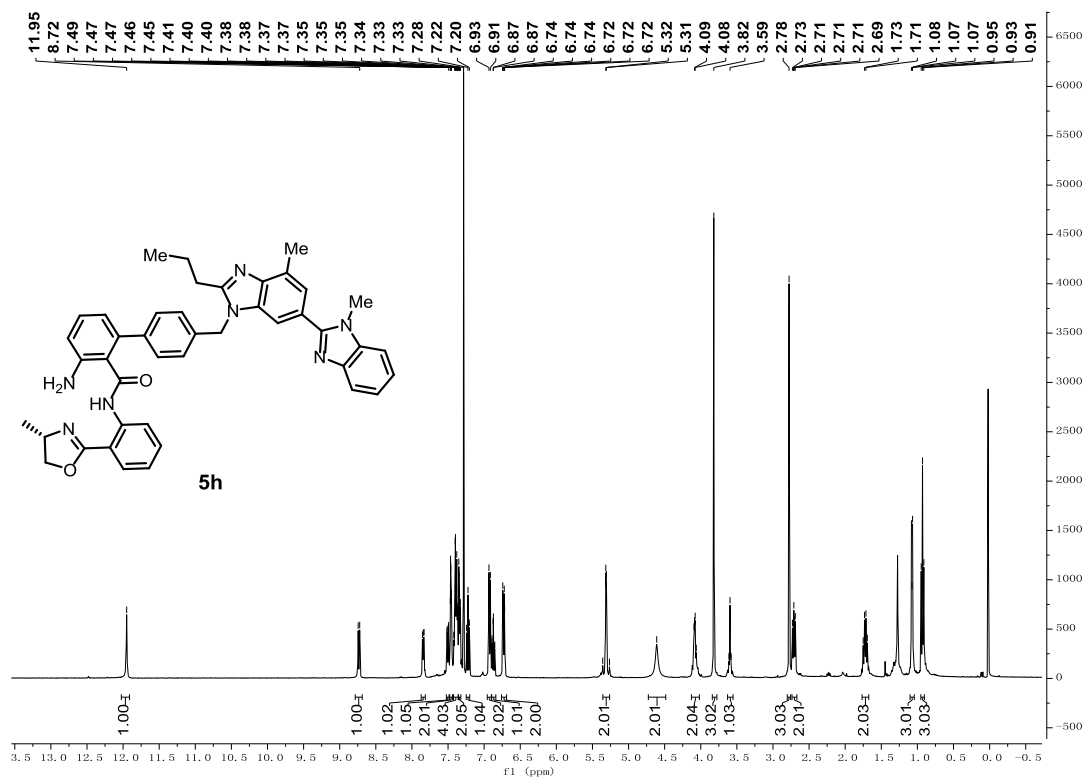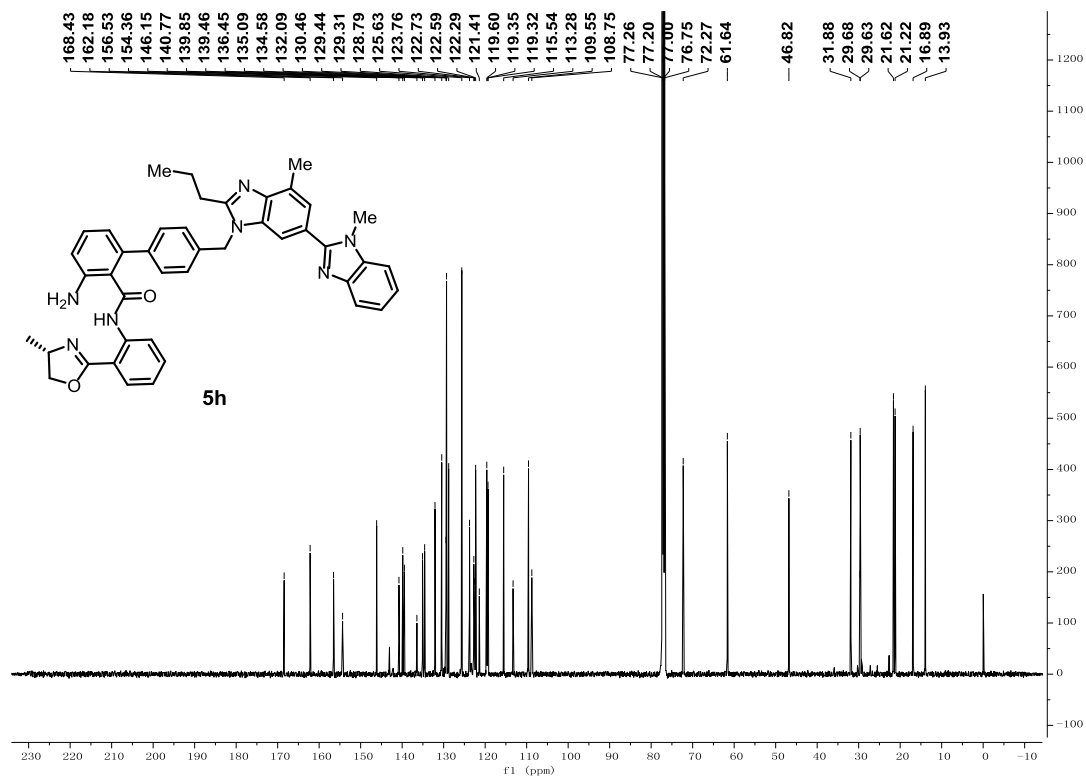

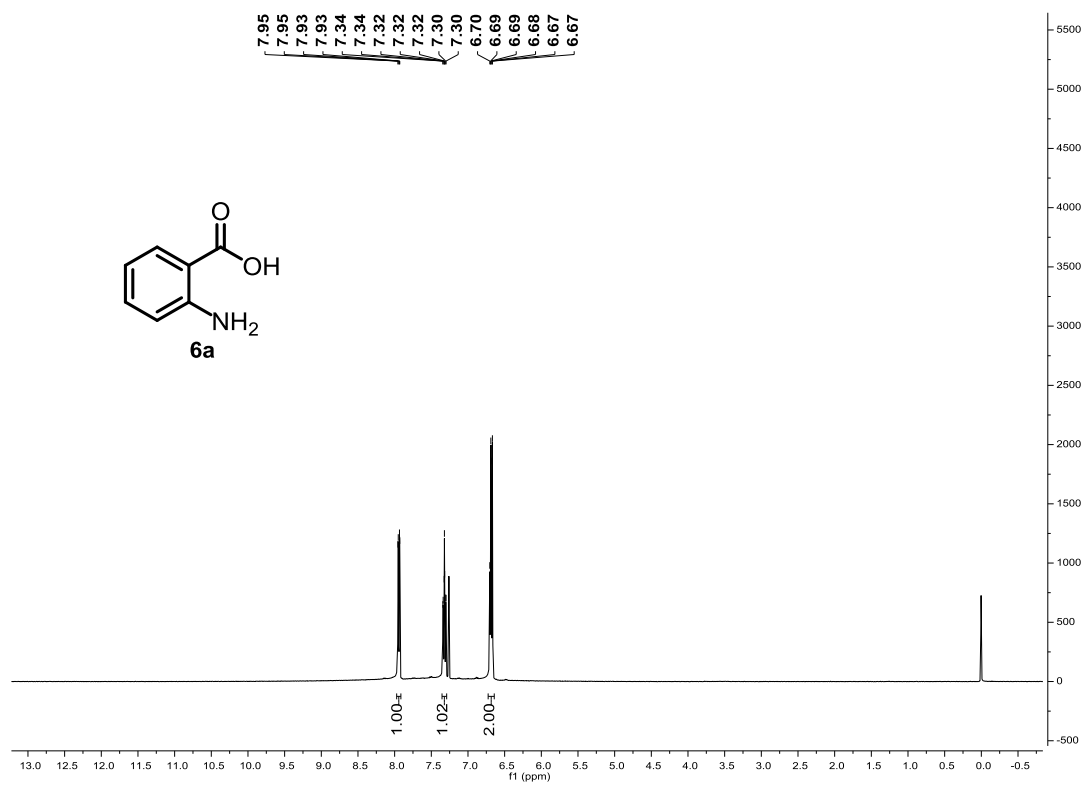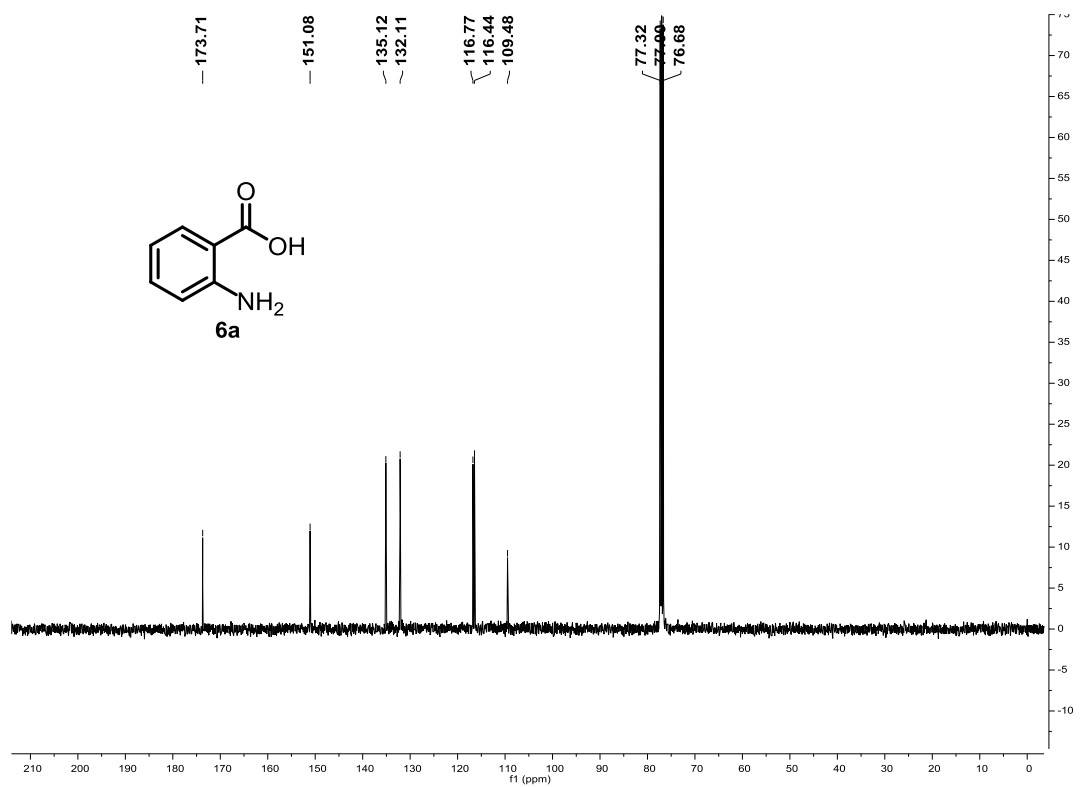

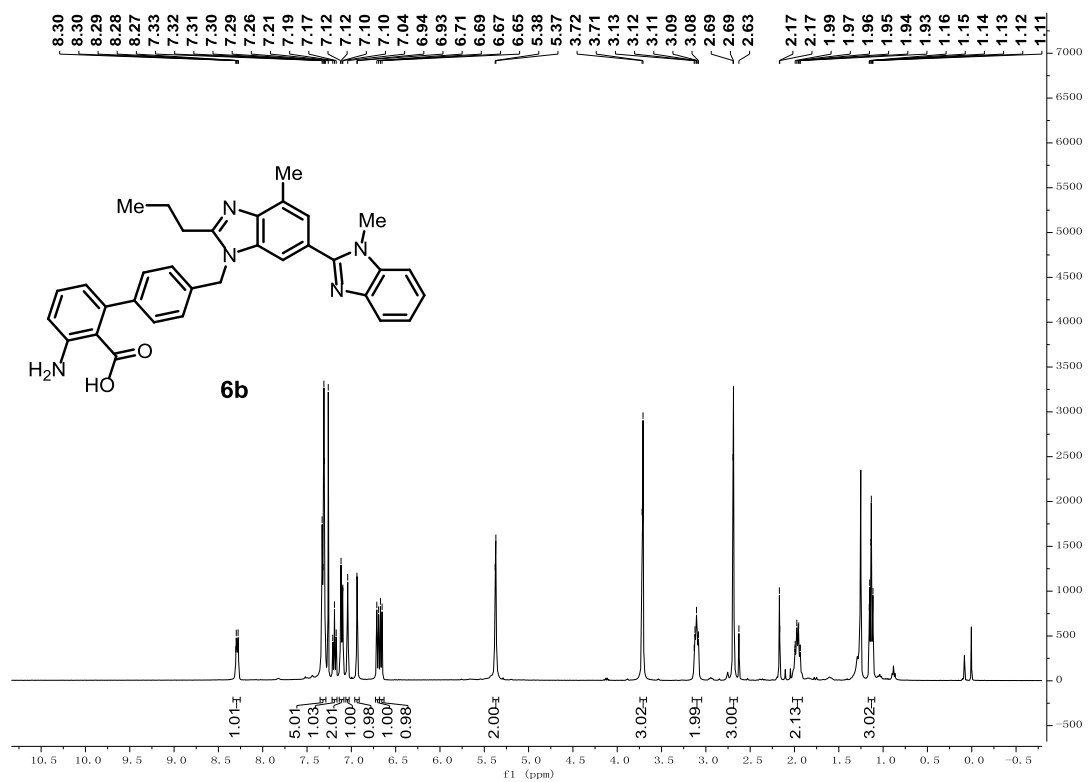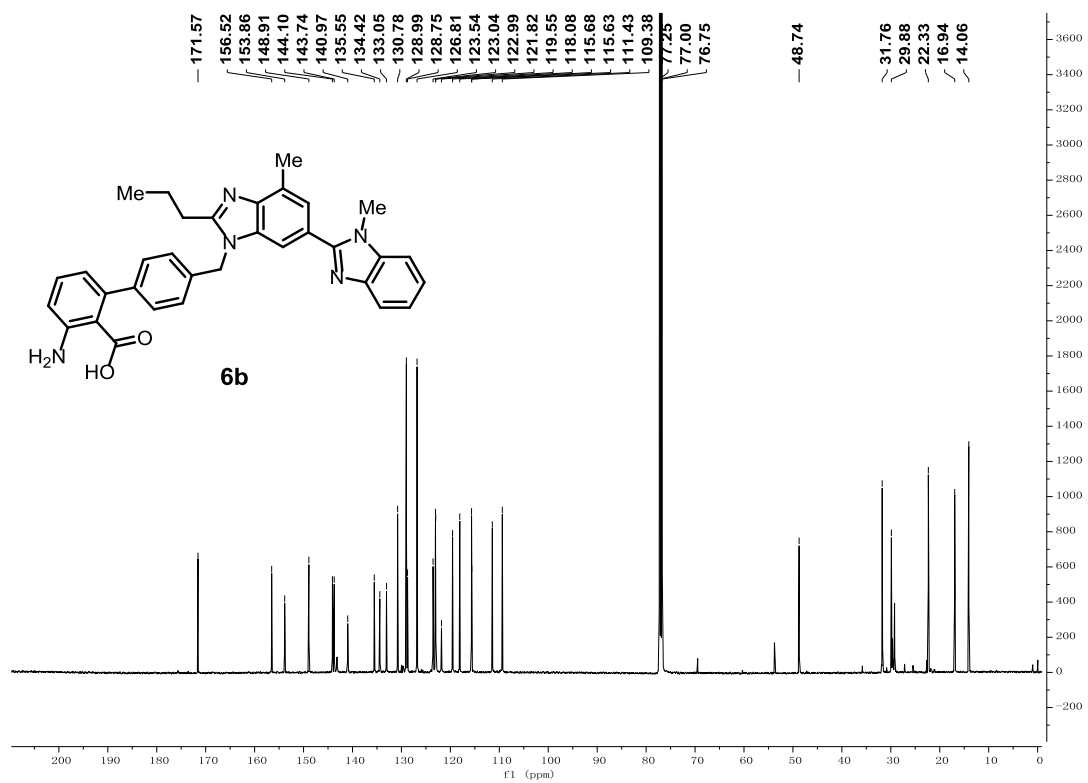

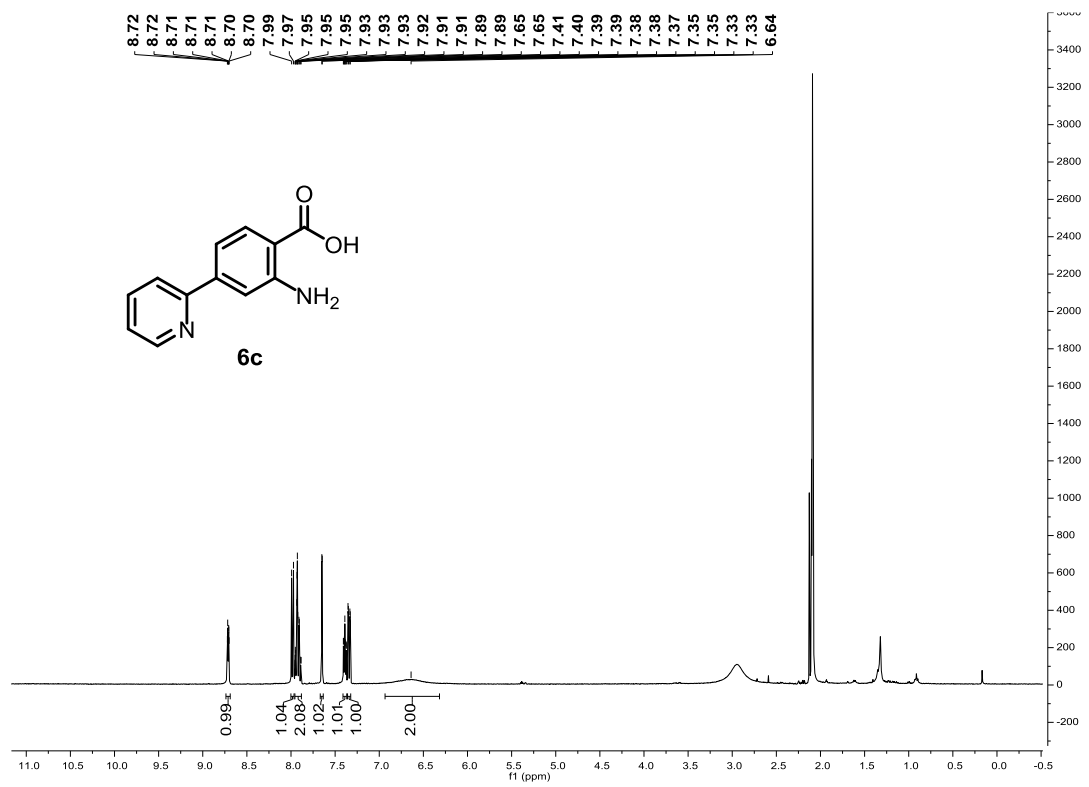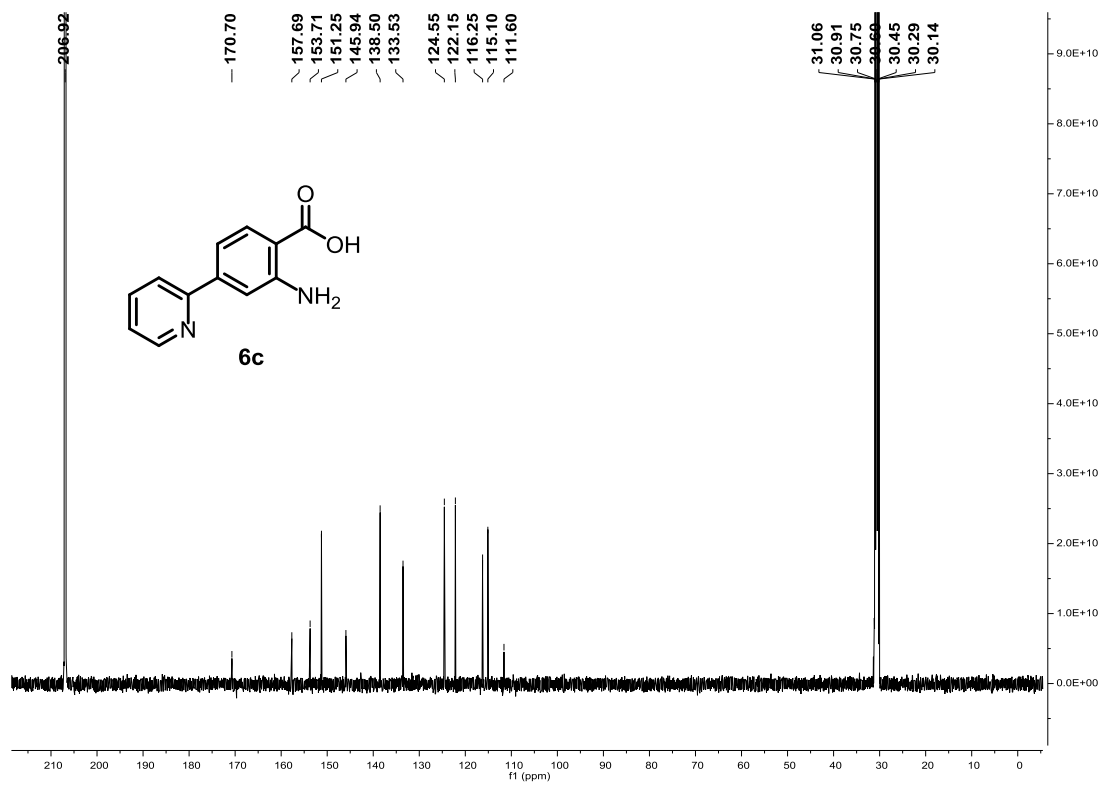



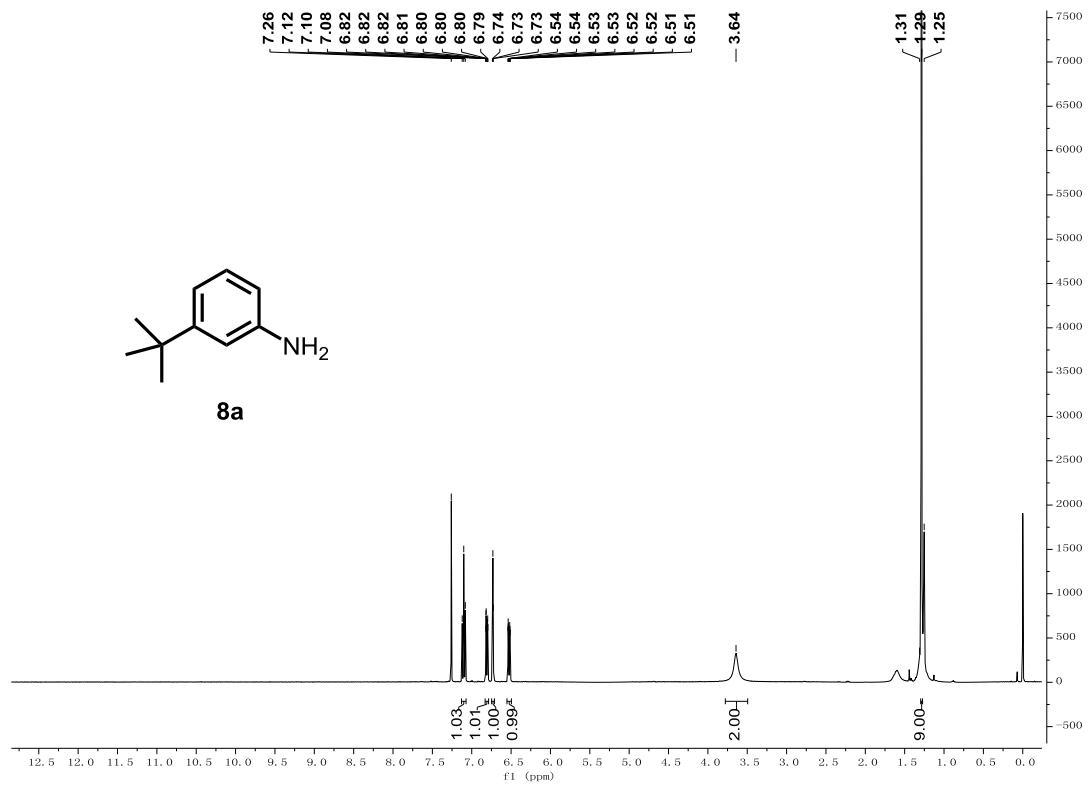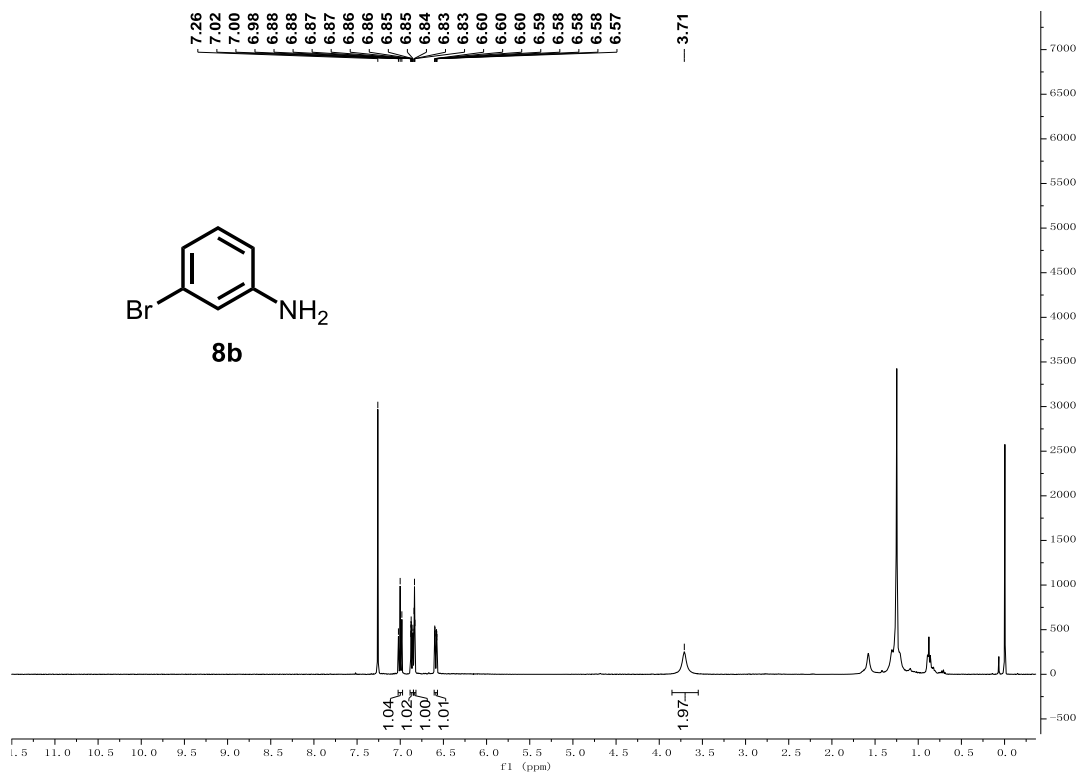

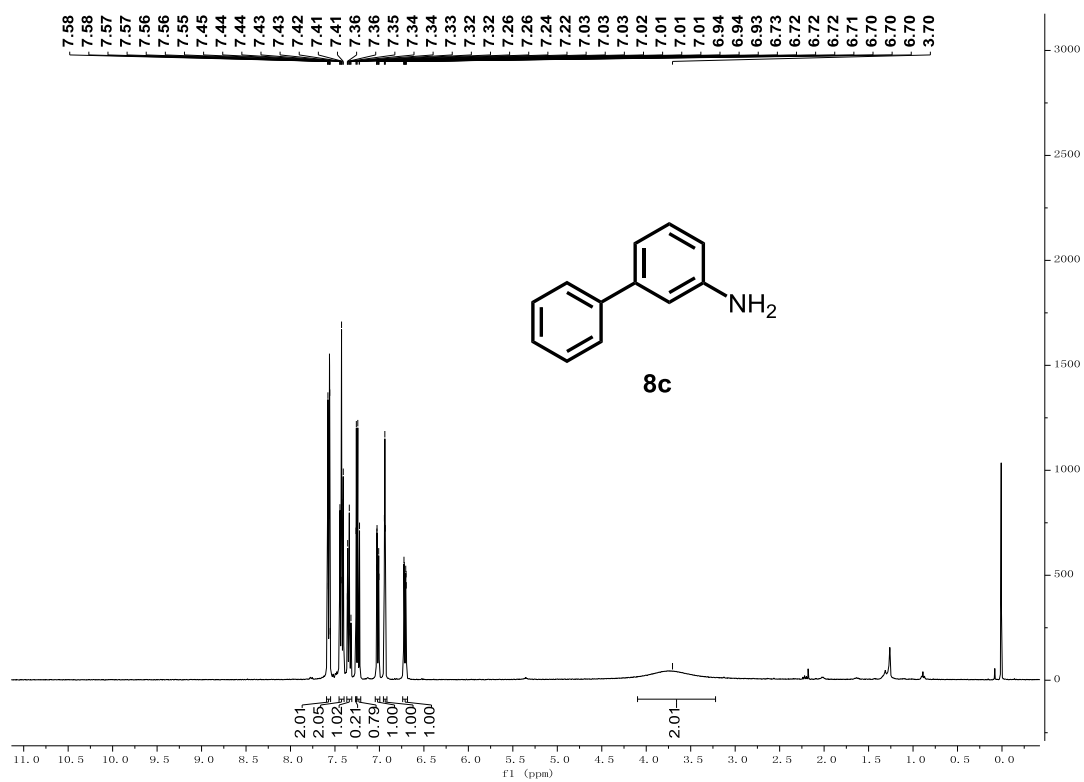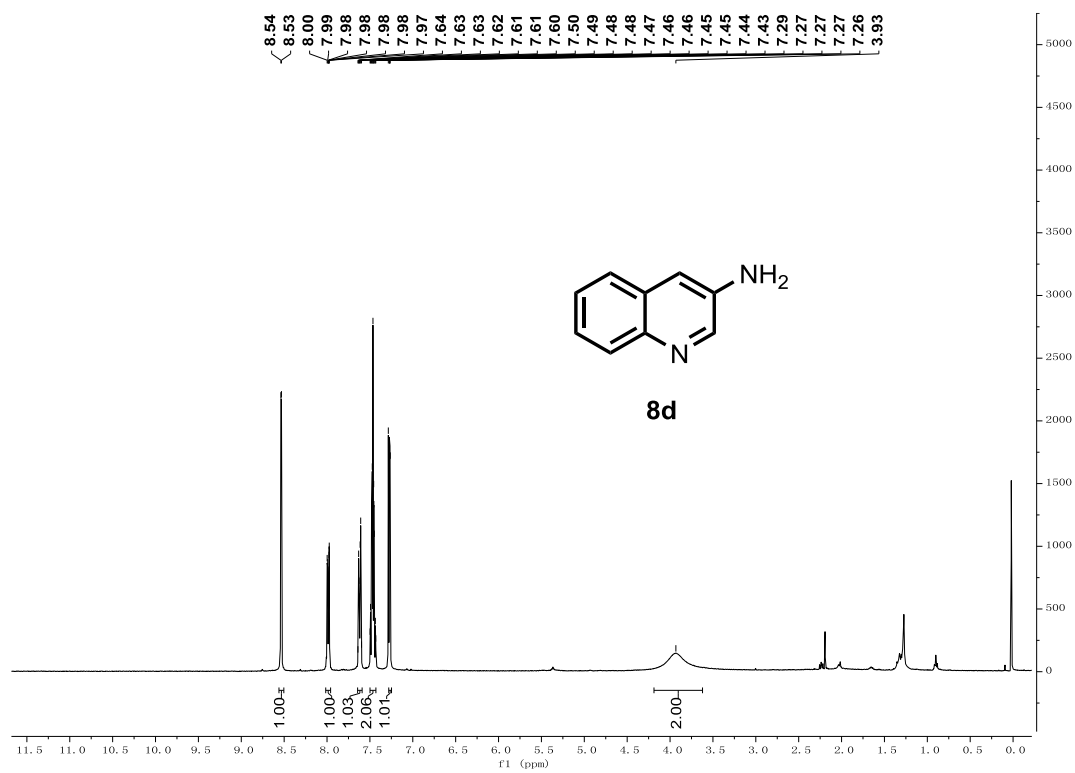



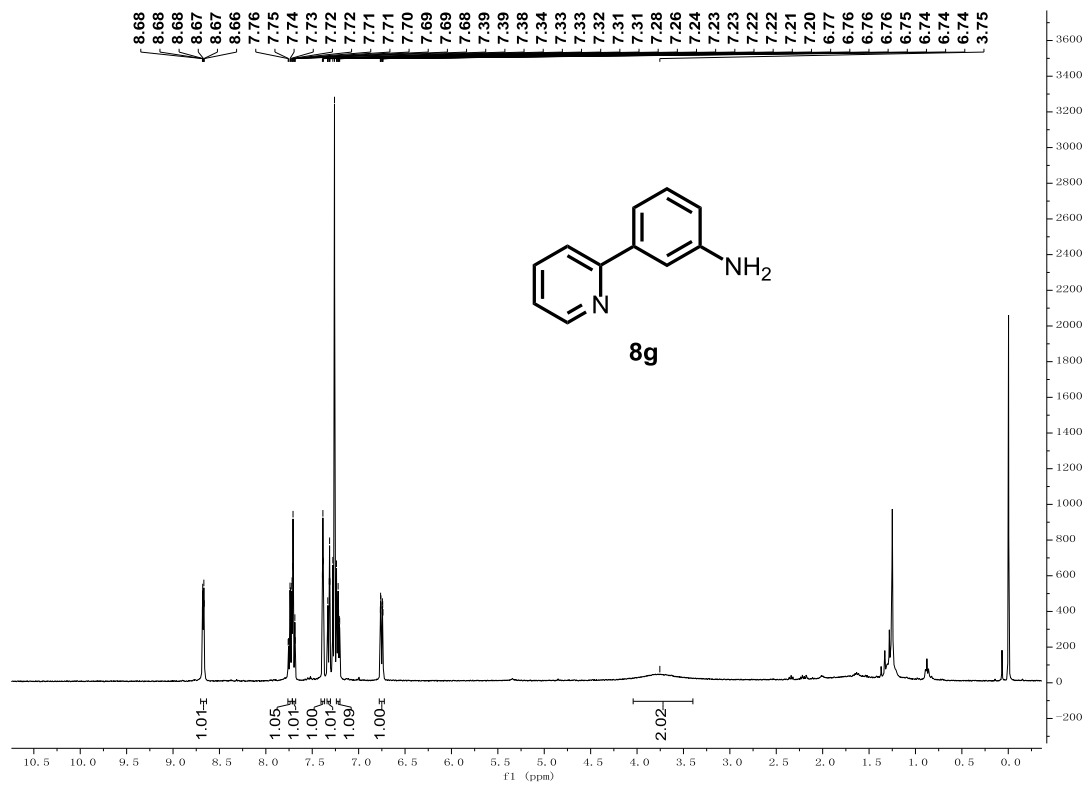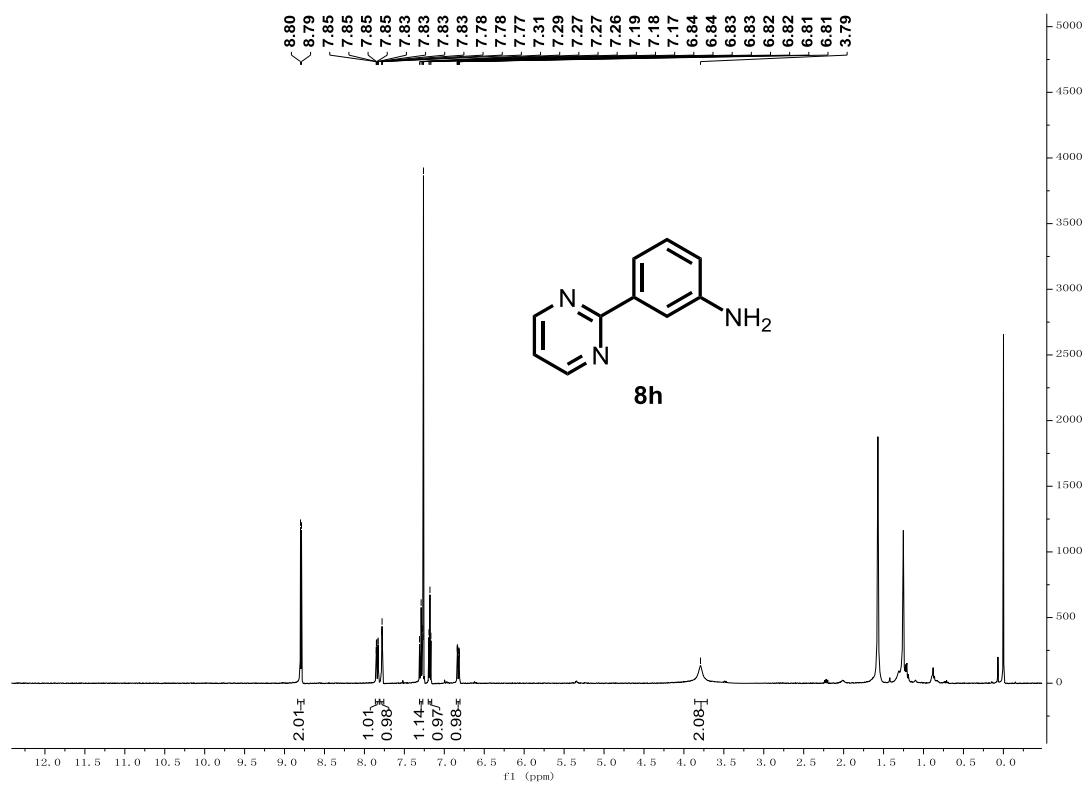

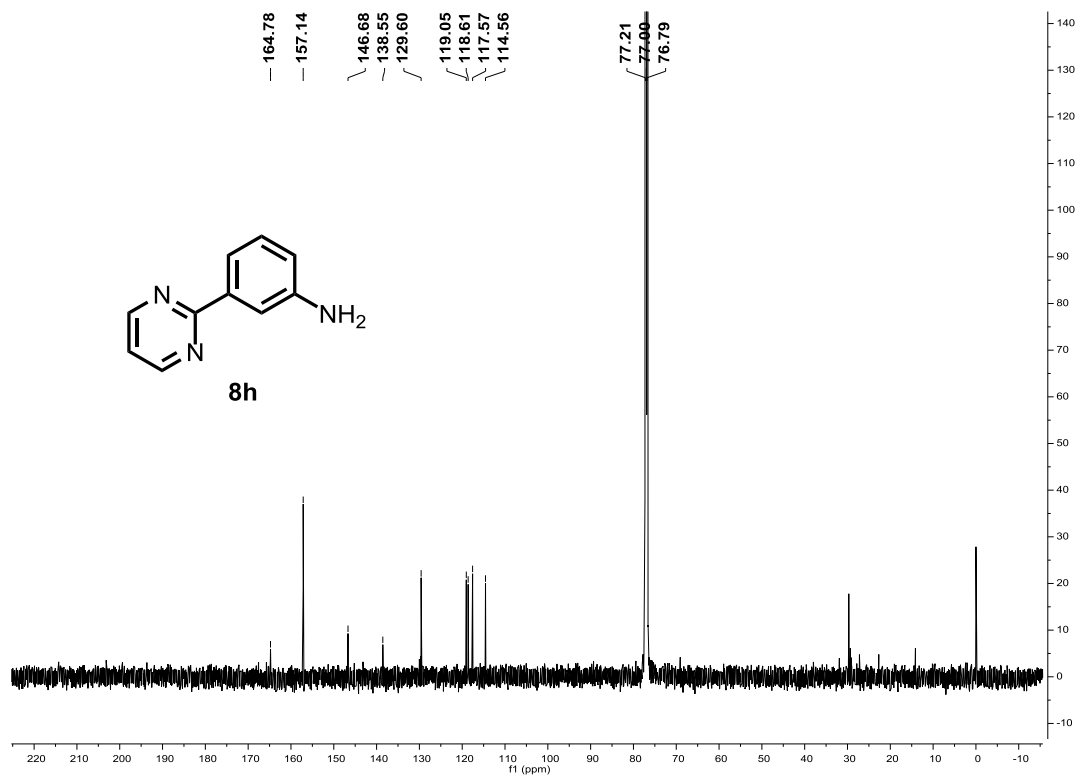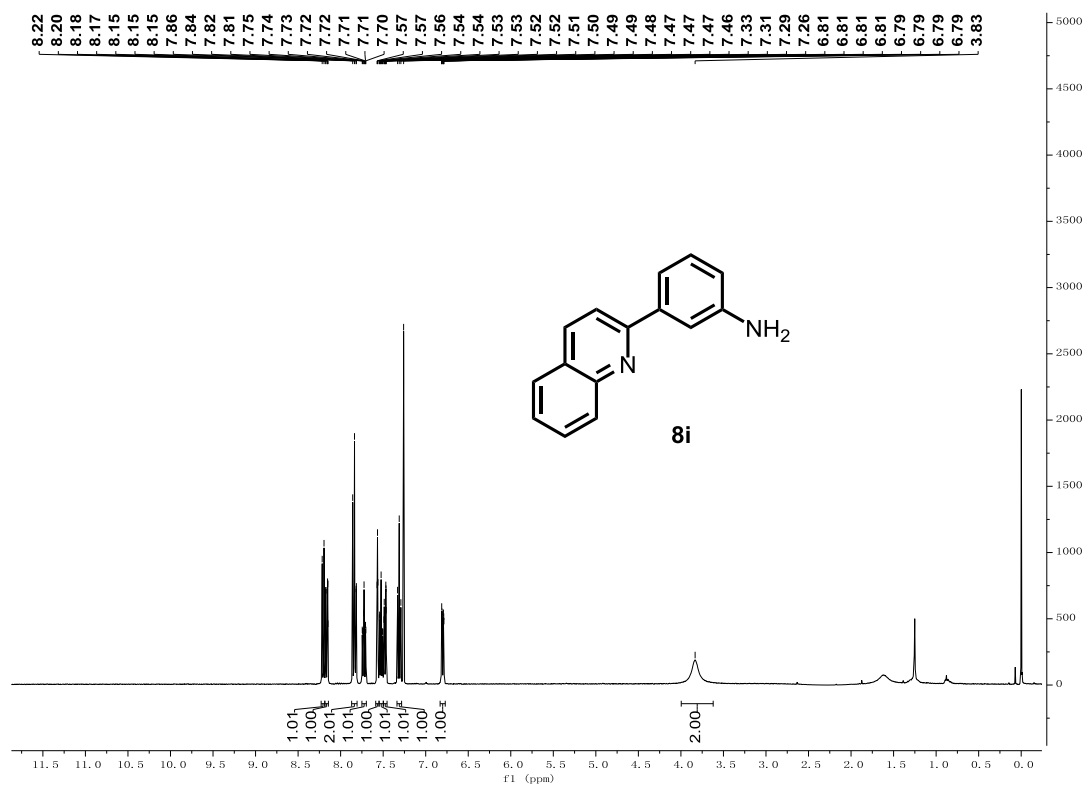

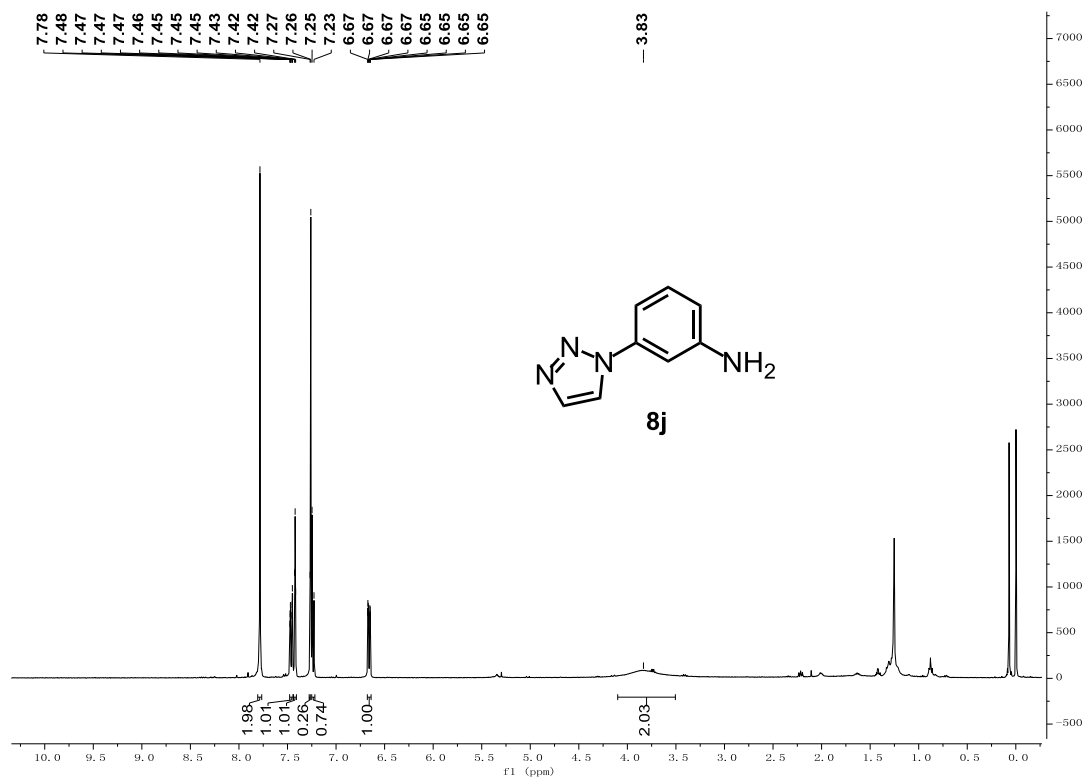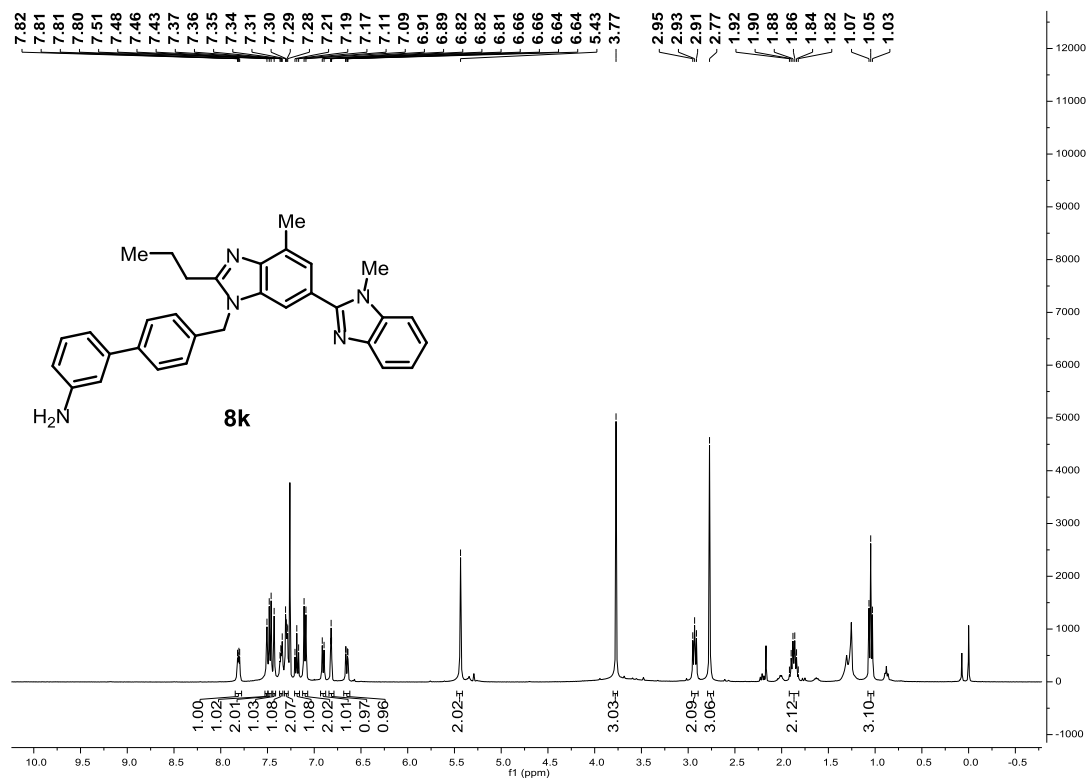

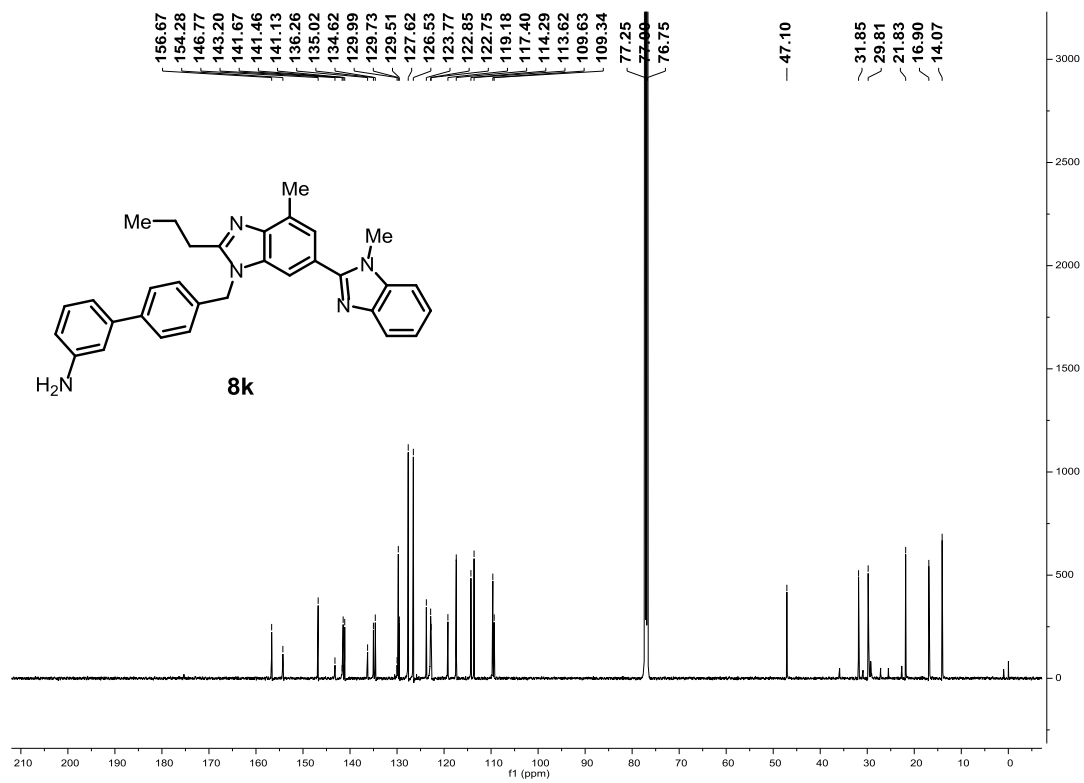

Supplement: SC-009-C8SC01256C-s001.pdf [file SC-009-C8SC01256C-s001.pdf]
